# Supplementary material for: Synthesis of cyclic chiral α-amino boronates by copper-catalyzed asymmetric dearomative borylation of indoles
Source: PubMed Central journal article supplement — Chem Sci. 2018 Jun 12;9(26):5855–9. doi: 10.1039/c8sc01815d (PMC6050576; doi:10.1039/c8sc01815d), 2018-06-12

Supporting Information for

**Synthesis of Cyclic Chiral  $\alpha$ -Amino Boronates by Copper-catalyzed Asymmetric Dearomative Borylation of Indoles**

Lili Chen, Jun-Jian Shen, Qian Gao, and Senmiao Xu\*

*State Key Laboratory for Oxo Synthesis and Selective Oxidation, Suzhou Research Institute, Lanzhou Institute of Chemical Physics (LICP), Chinese Academy of Sciences,*

*Lanzhou 730000, China*

*senmiaoxu@licp.cas.cn*

**Index**

|                                                                                           |          |
|-------------------------------------------------------------------------------------------|----------|
| 1. General.....                                                                           | S2       |
| 2. General procedures for the synthesis of N-Boc indole-3-carboxylate (GP1)...            | S3-S10   |
| 3. Synthesis of compound <b>S2</b> .....                                                  | S10      |
| 4. General procedures for the synthesis of compounds <b>1e</b> and <b>S3-S6</b> (GP2)...  | S10-S12  |
| 5. General procedures for the synthesis of compounds <b>1f</b> and <b>S7-S10</b> (GP3)... | S12-S14  |
| 6. Initial survey of copper-catalyzed dearomative borylation (Table S1).....              | S14      |
| 7. General procedures for asymmetric dearomative borylation of indole <b>1</b> ...        | S14-S26  |
| 8. Method to determine diastereoselective ratio (d.r.) by NMR.....                        | S26-S27  |
| 9. Control experiments for isomerization test.....                                        | S27-S29  |
| 10. Gram-scale dearomative borylation of indole <b>2c</b> .....                           | S30      |
| 11. C3 functionalization of 2-borylindoline <b>4</b> .....                                | S30-S33  |
| 12. NOSEY spectrum of allylated 2-borylindoline <b>4</b> .....                            | S33      |
| 13 Oxidation of 2-borylindoline <b>4</b> .....                                            | S33-S34  |
| 14 Stereospecific vinylation of 2-borylindoline <b>4</b> .....                            | S34-S35  |
| 15 Stereospecific arylation of 2-borylindoline <b>4</b> .....                             | S35-S36  |
| 16 Crystallographic data of compound <b>2s</b> .....                                      | S36-S37  |
| 17 NMR spectra of all new compounds.....                                                  | S37-S109 |

## ***1. General***

All oxygen- and moisture-sensitive manipulations were carried out under an inert atmosphere using standard Schlenk techniques or glovebox.

THF, Et<sub>2</sub>O, CH<sub>2</sub>Cl<sub>2</sub>, toluene, CH<sub>3</sub>CN, and 1,4-dioxane were purified by passing through a neutral alumina column under argon. All other chemicals and solvents were purchased and used as received.

<sup>1</sup>H NMR, <sup>13</sup>C NMR and <sup>11</sup>B NMR spectra were recorded on Zhongke-Niujin 400, Bruker 400, Bruker 600 NMR spectrometer at ambient temperature. <sup>13</sup>C shifts were obtained with <sup>1</sup>H decoupling. <sup>11</sup>B NMR chemical shifts are externally referenced to BF<sub>3</sub> OEt<sub>2</sub> (δ 0). HPLC data were collected on a Shimadzu LC-20AT spectrometer. Optical Rotation was recorded on a Perkin Elmer 341 polarimeter. High-resolution mass spectroscopy data were obtained on Agilent 6530, Agilent 6224 TOF LC/MS spectrometer. X-ray crystallography was measured on Bruker Smart APEX II.

## 2. General procedures for the synthesis of *N*-Boc indole-3-carboxylate **1** (GPI)

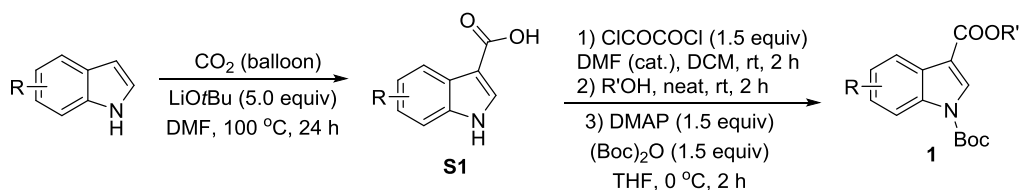

The preparation of indole-3-carboxylic acid **S1** was according to literature procedures.<sup>1</sup> To a 100mL flame-dried two-necked flask was charged with LiOtBu (2.0 g, 25 mmol, 5.0 equiv) was added indole (5 mmol, 1.0 equiv). The reaction vessel was evacuated under high vacuum and the atmosphere was replaced with a balloon of CO<sub>2</sub>. Then DMF (25 mL) was added and the mixture was allowed to stir for 24 h at 100 °C. Then the resulting mixture was cooled and carefully quenched by a solution of HCl (2 M, 50 mL) and extracted with EtOAc 3 times (3×30 mL). The combined organic layers were washed with water (50 mL), brine (50 mL) and dry over MgSO<sub>4</sub>. The dried organic phase was concentrated under reduced pressure and the residue (**S1**) was used in the next step without further purification.

Steps 2 and 3 were adapted from literature procedures.<sup>2,3</sup> To a 100-mL flask charged with crude **S1**, DCM (50 mL) and DMF (0.1 mL) was added (COCl)<sub>2</sub> (0.96 g, 7.5 mmol) slowly at 0 °C. The resulting mixture was then allowed to warm to room temperature and stir at same temperature for 2 h. After concentration, alcohol (30 mL) was introduced and the mixture was continued to stir at room temperature for additional 2 h. The alcohol was then removed and the residue was dissolved in THF (5 mL) followed by addition of DMAP (0.92 g, 7.5 mmol) and Boc<sub>2</sub>O (1.64 g, 7.5 mmol) at 0 °C. The reaction was then allowed to warm to room temperature and stir for 2 h. After concentration, the residue was purified by column chromatography on silica gel using PE/EtOAc (20:1) as the eluent to afford corresponding product **1**.

### Compound **1a**

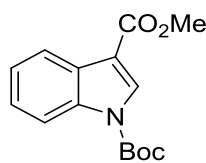

White solid, 1.32 g, 96% yield; <sup>1</sup>H NMR (400 MHz, CDCl<sub>3</sub>) δ 8.26 (s, 1H), 8.19-8.15 (m, 2H), 7.39-7.32 (m, 2H), 3.94 (s, 3H), 1.69 (s, 9H); <sup>13</sup>C NMR (100 MHz, CDCl<sub>3</sub>) δ 164.6, 148.9, 135.5, 132.0, 127.4, 125.1, 123.9, 121.6, 115.1, 112.1, 85.0, 51.4, 28.0; HRMS (ESI) calcd for C<sub>15</sub>H<sub>18</sub>NO<sub>4</sub> ([M+H]<sup>+</sup>): 276.1236, found: 276.1232.

1. W.-J. Yoo, M. G. Capdevila, X. Du and S. Kobayashi, *Org. Lett.* 2012, **14**, 5326.

2. E. C. Linton and M. C. Kozlowski, *J. Am. Chem. Soc.* 2008, **130**, 16162.

3. C. Fang, M. Li, X. Hu, W. Mo, B. Hu, N. Sun, L. Jin and Z. Shen *Adv. Syn. Catal.* 2016, **358**, 1157.

### Compound 1b

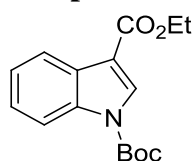

White solid, 1.39 g, 96% yield;  $^1\text{H}$  NMR (400 MHz,  $\text{CDCl}_3$ )  $\delta$  8.27(s, 1H), 8.18-8.15 (m, 2H), 7.39-7.32(m, 2H), 4.41 (q,  $J = 6.8$  Hz, 2H), 1.69 (s, 9H), 1.43 (t,  $J = 7.2$  Hz, 3H);  $^{13}\text{C}$  NMR (100 MHz,  $\text{CDCl}_3$ )  $\delta$  164.2, 149.0, 135.5, 132.0, 127.5, 125.0, 123.8, 121.7, 115.1, 112.5, 85.0, 60.3, 28.0, 14.4; HRMS (ESI) calcd for  $\text{C}_{16}\text{H}_{20}\text{NO}_4$  ( $[\text{M}+\text{H}]^+$ ): 290.1392, found: 290.1389.

### Compound 1c

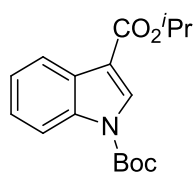

White solid, 1.48 g, 98% yield;  $^1\text{H}$  NMR (400 MHz,  $\text{CDCl}_3$ )  $\delta$  8.26 (s, 1H), 8.18-8.16 (m, 2H), 7.38-7.32 (m, 2H), 5.33-5.27 (m, 1H), 1.69 (s, 9H), 1.41 (d,  $J = 6.4$  Hz, 6H);  $^{13}\text{C}$  NMR (100 MHz,  $\text{CDCl}_3$ )  $\delta$  163.8, 149.0, 135.5, 131.9, 127.6, 125.0, 123.8, 121.7, 115.1, 112.9, 85.0, 67.7, 28.1, 22.1; HRMS (ESI) calcd for  $\text{C}_{17}\text{H}_{22}\text{NO}_4$  ( $[\text{M}+\text{H}]^+$ ): 304.1549, found: 304.1546.

### Compound 1d

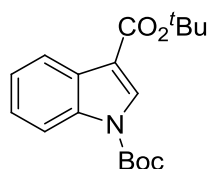

White solid, 1.47 g, 93% yield;  $^1\text{H}$  NMR (400 MHz,  $\text{CDCl}_3$ )  $\delta$  8.21 (s, 1H), 8.15-8.12 (m, 2H), 7.38-7.30 (m, 2H), 1.68 (s, 9H), 1.64 (s, 9H);  $^{13}\text{C}$  NMR (100 MHz,  $\text{CDCl}_3$ )  $\delta$  163.7, 149.1, 135.6, 131.8, 127.6, 124.9, 123.7, 121.7, 115.1, 114.1, 84.8, 80.9, 28.4, 28.1; HRMS (ESI) calcd for  $\text{C}_{18}\text{H}_{24}\text{NO}_4$  ( $[\text{M}+\text{H}]^+$ ): 318.1705, found: 318.1701.

### Compound 1g

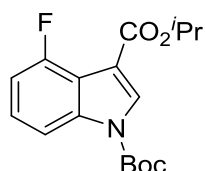

White solid, 0.66 g, 41% yield;  $^1\text{H}$  NMR (400 MHz,  $\text{CDCl}_3$ )  $\delta$  8.22 (s, 1H), 8.02 (d,  $J = 8.4$  Hz, 1H), 7.33-7.29 (m, 1H), 7.05-7.00 (m, 1H), 5.32-5.23 (m, 1H), 1.69 (s, 9H), 1.39 (d,  $J = 6.0$  Hz, 6H);  $^{13}\text{C}$  NMR (100 MHz,  $\text{CDCl}_3$ )  $\delta$  162.7, 155.9 (d,  $J = 252.0$  Hz), 148.7, 138.0 (d,  $J = 8.8$  Hz), 132.5, 126.0 (d,  $J = 7.7$  Hz), 115.5 (d,  $J = 19.6$  Hz),

112.3 (d,  $J = 3.8$  Hz), 111.2 (d,  $J = 4.0$  Hz), 110.3 (d,  $J = 20.8$  Hz), 85.5, 68.2, 28.0, 21.9; HRMS (ESI) calcd for  $C_{17}H_{21}FNO_4$  ( $[M+H]^+$ ): 322.1455, found: 322.1451.

### Compound 1h

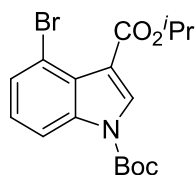

Colorless oil, 0.77 g, 40% yield;  $^1H$  NMR (400 MHz,  $CDCl_3$ )  $\delta$  8.22 (d,  $J = 8.0$  Hz, 1H), 8.11 (s, 1H), 7.52 (d,  $J = 7.6$  Hz, 1H), 7.22-7.18 (m, 1H), 5.33-5.24 (m, 1H), 1.68 (s, 9H), 1.41 (d,  $J = 6.4$  Hz, 6H);  $^{13}C$  NMR (100 MHz,  $CDCl_3$ )  $\delta$  163.3, 148.5, 136.7, 131.3, 128.8, 126.4, 125.9, 114.6, 114.3, 114.2, 85.4, 68.7, 28.0, 21.9; HRMS (ESI) calcd for  $C_{17}H_{21}^{79}BrNO_4$  ( $[M+H]^+$ ): 382.0654, found: 382.0650.

### Compound 1i

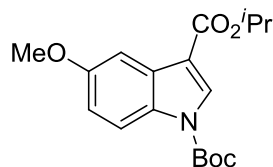

White solid, 0.69 g, 42% yield;  $^1H$  NMR (400 MHz,  $CDCl_3$ )  $\delta$  8.21 (s, 1H), 8.03 (d,  $J = 9.2$  Hz, 1H), 7.66 (d,  $J = 1.6$  Hz, 1H), 6.98-6.95 (m, 1H), 5.32-5.25 (m, 1H), 3.89 (s, 3H), 1.68 (s, 9H), 1.40 (d,  $J = 6.4$  Hz, 6H);  $^{13}C$  NMR (100 MHz,  $CDCl_3$ )  $\delta$  163.9, 156.7, 149.0, 132.1, 130.1, 128.7, 115.9, 114.3, 112.5, 103.7, 84.9, 67.7, 55.6, 28.1, 22.1; HRMS (ESI) calcd for  $C_{18}H_{24}NO_5$  ( $[M+H]^+$ ): 334.1654, found: 334.1650.

### Compound 1j

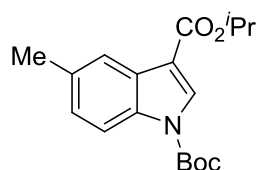

White solid, 0.68 g, 43% yield;  $^1H$  NMR (400 MHz,  $CDCl_3$ )  $\delta$  8.20 (s, 1H), 8.02 (d,  $J = 8.4$  Hz, 1H), 7.96 (s, 1H), 7.17 (d,  $J = 8.0$  Hz, 1H), 5.34-5.24 (m, 1H), 2.48 (s, 3H), 1.68 (s, 9H), 1.41 (d,  $J = 6.4$  Hz, 6H);  $^{13}C$  NMR (100 MHz,  $CDCl_3$ )  $\delta$  164.0, 149.1, 133.7, 133.5, 131.9, 127.8, 126.4, 121.5, 114.7, 112.5, 84.8, 67.7, 28.1, 22.1, 21.5; HRMS (ESI) calcd for  $C_{18}H_{24}NO_4$  ( $[M+H]^+$ ): 318.1705, found: 318.1703.

### Compound 1k

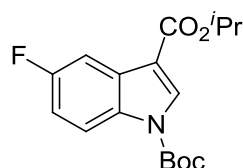

White solid, 0.69 g, 43% yield;  $^1\text{H}$  NMR (400 MHz,  $\text{CDCl}_3$ )  $\delta$  8.27 (s, 1H), 8.13-8.10 (m, 1H), 7.82-7.79 (m, 1H), 7.11-7.06 (m, 1H), 5.33-5.26 (m, 1H), 1.69 (s, 9H), 1.41 (d,  $J = 6.4$  Hz, 6H);  $^{13}\text{C}$  NMR (100 MHz,  $\text{CDCl}_3$ )  $\delta$  162.3 (d,  $J = 242.2$  Hz), 158.7, 148.8, 133.1, 131.9, 128.6, 116.2 (d,  $J = 9.2$  Hz), 113.0 (d,  $J = 25.2$  Hz), 112.7 (d,  $J = 3.8$  Hz), 107.5 (d,  $J = 25.1$  Hz), 85.3, 68.0, 28.1, 22.0; HRMS (ESI) calcd for  $\text{C}_{17}\text{H}_{21}\text{FNO}_4$  ( $[\text{M}+\text{H}]^+$ ): 322.1455, found: 322.1451.

### Compound 1l

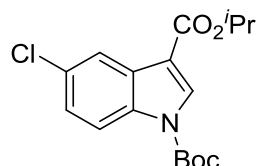

White solid, 1.23 g, 73% yield;  $^1\text{H}$  NMR (400 MHz,  $\text{CDCl}_3$ )  $\delta$  8.24 (s, 1H), 8.13 (d,  $J = 2.0$  Hz, 1H), 8.09 (d,  $J = 8.8$  Hz, 1H), 7.33-7.30 (m, 1H), 5.34-5.25 (m, 1H), 1.69 (s, 9H), 1.41 (d,  $J = 6.4$  Hz, 6H);  $^{13}\text{C}$  NMR (100 MHz,  $\text{CDCl}_3$ )  $\delta$  163.4, 148.7, 133.9, 132.8, 129.7, 128.7, 125.3, 121.4, 116.2, 112.3, 85.4, 68.1, 28.0, 22.0; HRMS (ESI) calcd for  $\text{C}_{17}\text{H}_{21}^{35}\text{ClNO}_4$  ( $[\text{M}+\text{H}]^+$ ): 338.1159, found: 338.1154.

### Compound 1m

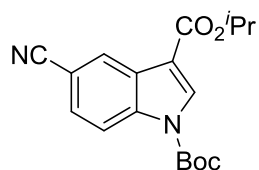

White solid, 0.66 g, 40% yield;  $^1\text{H}$  NMR (400 MHz,  $\text{CDCl}_3$ )  $\delta$  8.50 (s, 1H), 8.33 (s, 1H), 8.29 (d,  $J = 8.8$  Hz, 1H), 7.62 (d,  $J = 8.4$  Hz, 1H), 5.37-5.27 (m, 1H), 1.71 (s, 9H), 1.43 (d,  $J = 6.0$  Hz, 6H);  $^{13}\text{C}$  NMR (100 MHz,  $\text{CDCl}_3$ )  $\delta$  162.9, 148.3, 137.3, 133.6, 128.1, 127.6, 126.8, 119.5, 116.1, 112.8, 107.5, 86.3, 68.5, 28.0, 22.0; HRMS (ESI) calcd for  $\text{C}_{18}\text{H}_{21}\text{N}_2\text{O}_4$  ( $[\text{M}+\text{H}]^+$ ): 329.1501, found: 329.1495.

### Compound 1n

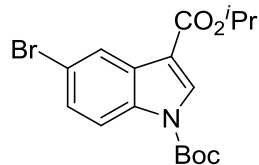

White solid, 0.92 g, 48% yield;  $^1\text{H}$  NMR (400 MHz,  $\text{CDCl}_3$ )  $\delta$  8.30 (d,  $J = 1.6$  Hz, 1H), 8.22 (s, 1H), 8.04 (d,  $J = 8.8$  Hz, 1H), 7.47-7.44 (m, 1H), 5.34-5.24 (m, 1H), 1.68 (s, 9H), 1.41 (d,  $J = 6.4$  Hz, 6H);  $^{13}\text{C}$  NMR (100 MHz,  $\text{CDCl}_3$ )  $\delta$  163.3, 148.6, 134.2, 132.6, 129.2, 127.9, 124.4, 117.5, 116.5, 112.2, 85.5, 68.0, 28.0, 22.0; HRMS (ESI) calcd for  $\text{C}_{17}\text{H}_{21}^{81}\text{BrNO}_4$  ( $[\text{M}+\text{H}]^+$ ): 384.0633, found: 384.0640.

### Compound 1o

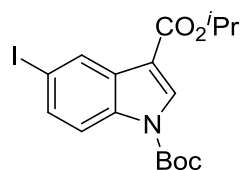

White solid, 0.90 g, 42% yield;  $^1\text{H}$  NMR (400 MHz,  $\text{CDCl}_3$ )  $\delta$  8.52 (d,  $J = 1.6$  Hz, 1H), 8.18 (s, 1H), 7.93 (d,  $J = 8.8$  Hz, 1H), 7.65-7.63 (m, 1H), 5.33-5.24 (m, 1H), 1.68 (s, 9H), 1.41 (d,  $J = 6.4$  Hz, 6H);  $^{13}\text{C}$  NMR (100 MHz,  $\text{CDCl}_3$ )  $\delta$  163.3, 148.6, 134.8, 133.6, 132.2, 130.6, 129.7, 116.9, 112.0, 88.4, 85.5, 68.1, 28.0, 22.0; HRMS (ESI) calcd for  $\text{C}_{17}\text{H}_{20}\text{INNaO}_4$  ( $[\text{M}+\text{Na}]^+$ ): 452.0335, found: 452.0330.

### Compound 1p

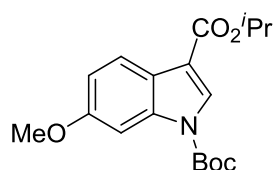

White solid, 0.55 g, 33% yield;  $^1\text{H}$  NMR (400 MHz,  $\text{CDCl}_3$ )  $\delta$  8.13 (s, 1H), 8.00 (d,  $J = 8.8$  Hz, 1H), 7.75 (s, 1H), 6.98-6.96 (m, 1H), 5.33-5.24 (m, 1H), 3.88 (s, 3H), 1.69 (s, 9H), 1.40 (d,  $J = 6.4$  Hz, 6H);  $^{13}\text{C}$  NMR (100 MHz,  $\text{CDCl}_3$ )  $\delta$  163.9, 158.1, 149.1, 136.6, 130.6, 122.2, 121.3, 113.3, 113.0, 99.0, 84.8, 67.7, 55.6, 28.1, 22.1; HRMS (ESI) calcd for  $\text{C}_{18}\text{H}_{23}\text{NNaO}_5$  ( $[\text{M}+\text{Na}]^+$ ): 356.1474, found: 356.1472.

### Compound 1q

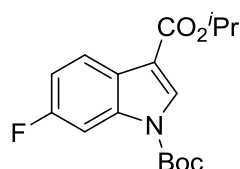

White solid, 0.85 g, 53% yield;  $^1\text{H}$  NMR (400 MHz,  $\text{CDCl}_3$ )  $\delta$  8.21 (s, 1H), 8.10-8.07 (m, 1H), 7.90-7.88 (m, 1H), 7.11-7.06 (m, 1H), 5.34-5.24 (m, 1H), 1.69 (s, 9H), 1.40 (d,  $J = 6.4$  Hz, 6H);  $^{13}\text{C}$  NMR (100 MHz,  $\text{CDCl}_3$ )  $\delta$  163.6, 161.1 (d,  $J = 240.0$  Hz), 148.7, 135.7 (d,  $J = 12.9$  Hz), 131.9 (d,  $J = 3.2$  Hz), 123.9, 122.6 (d,  $J = 9.7$  Hz), 112.8, 112.2 (d,  $J = 23.8$  Hz), 102.5 (d,  $J = 28.5$  Hz), 85.4, 67.9, 28.0, 22.0; HRMS (ESI) calcd for  $\text{C}_{17}\text{H}_{21}\text{FNO}_4$  ( $[\text{M}+\text{H}]^+$ ): 322.1455, found: 322.1450.

### Compound 1r

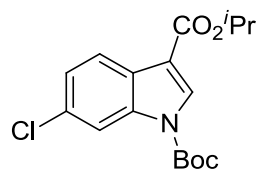

White solid, 0.62 g, 37% yield;  $^1\text{H}$  NMR (400 MHz,  $\text{CDCl}_3$ )  $\delta$  8.21 (s, 2H), 8.06 (d,  $J = 8.4$  Hz, 1H), 7.32-7.29 (m, 1H), 5.33-5.24 (m, 1H), 1.69 (s, 9H), 1.40 (d,  $J = 6.4$  Hz, 6H);  $^{13}\text{C}$  NMR (100 MHz,  $\text{CDCl}_3$ )  $\delta$  163.4, 148.6, 135.8, 132.1, 131.0, 126.1, 124.4, 122.5, 115.4, 112.8, 85.5, 67.9, 28.0, 22.0; HRMS (ESI) calcd for  $\text{C}_{17}\text{H}_{21}^{35}\text{ClNO}_4$  ( $[\text{M}+\text{H}]^+$ ): 338.1159, found: 338.1153.

### Compound 1s

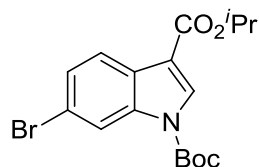

White solid, 1.24 g, 65% yield;  $^1\text{H}$  NMR (400 MHz,  $\text{CDCl}_3$ )  $\delta$  8.38 (s, 1H), 8.19 (s, 1H), 8.01 (d,  $J = 8.4$  Hz, 1H), 7.45 (d,  $J = 8.4$  Hz, 1H), 5.32-5.26 (m, 1H), 1.69 (s, 9H), 1.41 (d,  $J = 6.0$  Hz, 6H);  $^{13}\text{C}$  NMR (100 MHz,  $\text{CDCl}_3$ )  $\delta$  163.4, 148.6, 136.1, 132.0, 127.1, 126.4, 122.8, 118.8, 118.3, 112.8, 85.6, 68.0, 28.0, 22.0; HRMS (ESI) calcd for  $\text{C}_{17}\text{H}_{20}^{81}\text{BrNNaO}_4$  ( $[\text{M}+\text{Na}]^+$ ): 406.0453, found: 406.0449.

### Compound 1t

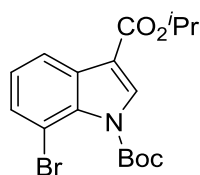

White solid, 0.99 g, 52% yield;  $^1\text{H}$  NMR (400 MHz,  $\text{CDCl}_3$ )  $\delta$  8.18-8.16(m, 2H), 7.57 (d,  $J = 7.6$  Hz, 1H), 7.22-7.19 (m, 1H), 5.32-5.26 (m, 1H), 1.68 (s, 9H), 1.41 (d,  $J = 6.0$  Hz, 6H);  $^{13}\text{C}$  NMR (100 MHz,  $\text{CDCl}_3$ )  $\delta$  163.3, 147.8, 135.0, 133.8, 130.9, 130.3, 125.0, 121.0, 112.3, 107.4, 85.7, 67.9, 27.8, 22.0; HRMS (ESI) calcd for  $\text{C}_{17}\text{H}_{21}^{79}\text{BrNO}_4$  ( $[\text{M}+\text{H}]^+$ ): 382.0654, found: 382.0651.

### Compound 1u

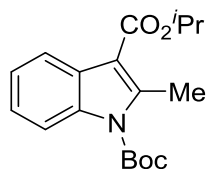

White solid, 0.16 g, 10% yield;  $^1\text{H}$  NMR (400 MHz,  $\text{CDCl}_3$ )  $\delta$  8.11-8.06 (m, 2H), 7.29-7.27 (m, 2H), 5.35-5.29 (m, 1H), 2.98 (s, 3H), 1.70 (s, 9H), 1.43 (d,  $J = 6.0$  Hz, 6H);  $^{13}\text{C}$  NMR (100 MHz,  $\text{CDCl}_3$ )  $\delta$  165.0, 150.0, 145.6, 135.4, 127.2, 124.0, 123.5, 121.3, 114.8, 110.6, 84.9, 67.5, 28.1, 22.2, 15.0; HRMS (ESI) calcd for  $\text{C}_{18}\text{H}_{24}\text{NO}_4$  ( $[\text{M}+\text{H}]^+$ ): 318.1705, found: 318.1704.



### Compound 1v

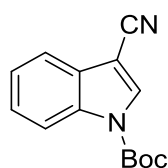

White solid, 1.20 g, 99% yield;  $^1\text{H}$  NMR (400 MHz,  $\text{CDCl}_3$ )  $\delta$  8.17 (d,  $J = 8.4$  Hz, 1H), 8.10 (s, 1H), 7.70 (d,  $J = 7.6$  Hz, 1H), 7.46-7.35 (m, 2H), 1.70 (s, 9H);  $^{13}\text{C}$  NMR (100 MHz,  $\text{CDCl}_3$ )  $\delta$  148.1, 134.2, 133.2, 128.0, 126.2, 124.2, 119.7, 115.6, 114.1, 92.2, 85.9, 27.9; HRMS (ESI) calcd for  $\text{C}_{14}\text{H}_{14}\text{N}_2\text{NaO}_2$  ( $[\text{M}+\text{Na}]^+$ ): 265.0947, found: 265.0949.

### Compound 1w

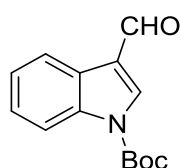

White solid, 1.04 g, 85% yield;  $^1\text{H}$  NMR (400 MHz,  $\text{CDCl}_3$ )  $\delta$  10.10 (s, 1H), 8.29 (d,  $J = 7.6$  Hz, 1H), 8.24 (s, 1H), 8.15 (d,  $J = 8.0$  Hz, 1H), 7.44-7.36 (m, 2H), 1.71 (s, 9H);  $^{13}\text{C}$  NMR (100 MHz,  $\text{CDCl}_3$ )  $\delta$  185.8, 156.6, 148.8, 136.5, 135.9, 126.1, 124.6, 122.1, 121.5, 115.1, 85.6, 28.1; HRMS (ESI) calcd for  $\text{C}_{14}\text{H}_{16}\text{NO}_3$  ( $[\text{M}+\text{H}]^+$ ): 246.1125, found: 246.1127.

### Compound 1x

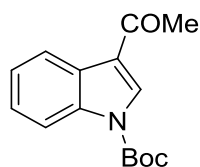

White solid, 1.17 g, 90% yield;  $^1\text{H}$  NMR (400 MHz,  $\text{CDCl}_3$ )  $\delta$  8.38-8.36 (m, 1H), 8.23 (s, 1H), 8.11 (d,  $J = 7.2$  Hz, 1H), 7.40-7.33 (m, 2H), 2.57 (s, 3H), 1.72 (s, 9H);  $^{13}\text{C}$  NMR (100 MHz,  $\text{CDCl}_3$ )  $\delta$  193.9, 149.1, 135.5, 132.4, 127.3, 125.4, 124.3, 122.7, 120.6, 114.9, 85.4, 28.1, 27.7; HRMS (ESI) calcd for  $\text{C}_{15}\text{H}_{17}\text{NNaO}_3$  ( $[\text{M}+\text{Na}]^+$ ): 282.1101, found: 282.1105.

### Compound 1y

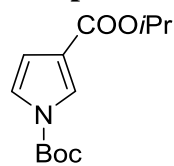

Colorless oil, 0.77 g, 60% yield;  $^1\text{H}$  NMR (400 MHz,  $\text{CDCl}_3$ )  $\delta$  7.80 (s, 1H), 7.20-7.19 (m, 1H), 6.60-6.59 (m, 1H), 5.23-5.13 (m, 1H), 1.61 (s, 9H), 1.32 (d,  $J = 6.0$  Hz, 6H);  $^{13}\text{C}$  NMR (100 MHz,  $\text{CDCl}_3$ )  $\delta$  163.6, 148.1, 124.5, 120.5, 111.9, 84.8, 81.0,

67.4, 27.8, 21.9; HRMS (ESI) calcd for C<sub>13</sub>H<sub>20</sub>NO<sub>4</sub> ([M+H]<sup>+</sup>): 254.1387, found: 254.1390.

### 3. Synthesis of Compound S2

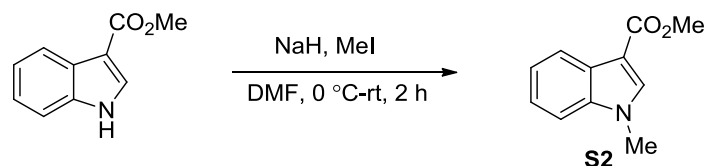

The preparation of compound **S2** was adapted from the literature procedures.<sup>4</sup> To a 50-mL flask charged with methyl indole-3-carboxylate (1.75 g, 10 mmol) and DMF (10 mL) was added NaH (0.80 g, 60% in mineral oil, 20 mmol) in 5 portions at 0 °C. The resulting mixture was allowed to stir at same temperature for 0.5 h. Methyl iodide (1.24 mL, 20 mmol) was then introduced slowly at 0 °C. The reaction was then warmed to room temperature and continued to stir for 2 h. Water (10 mL) was then added slowly at 0 °C to quench the reaction. The mixture was then extracted with EtOAc 3 times (3 X 30 mL). The combined organic phase was then washed with water 3 times (3 X 20 mL). After removal of the solvent, the residue was purified by column chromatography on silica gel using PE/EtOAc (20:1) as the eluent to afford *N*-Methyl indole **S2** as white solid (1.88 g, 99% yield).

<sup>1</sup>H NMR (400 MHz, CDCl<sub>3</sub>) δ 8.18-8.16 (m, 1H), 7.75 (s, 1H), 7.33-7.27 (m, 3H), 3.90 (s, 3H), 3.79 (s, 3H); <sup>13</sup>C NMR (100 MHz, CDCl<sub>3</sub>) δ 165.4, 137.1, 135.1, 126.5, 122.7, 121.8, 121.5, 109.7, 106.7, 50.9, 33.4; HRMS (ESI) calcd for C<sub>11</sub>H<sub>12</sub>NO<sub>2</sub> ([M+H]<sup>+</sup>): 190.0868, found: 190.0861.

### 4. General Procedures for the synthesis of compounds 1e and S3-S6 (GP2)

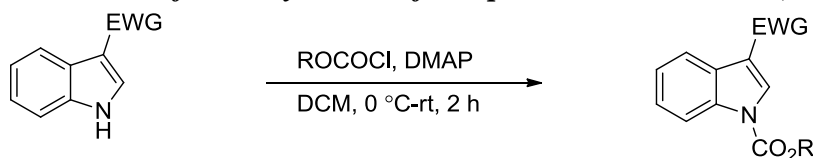

The synthesis of compounds **1e** and **S3-S6** was adapted from literature procedures.<sup>5</sup> To a 100-mL flask charged with 3-substituted indole (10 mmol, carboxylic esters were prepared according to the GP1) and DCM (20 mL) was introduced DMAP (1.8 g, 15 mmol, 1.5 equiv) followed by slow addition of chloro methylformate or CbzCl (15 mmol, 1.5 equiv) at 0 °C. The resulting mixture was allowed to warm to room temperature and stir for 2 h. The reaction was then diluted by 1 M HCl (20 mL) and extracted with DCM 3 times (3 X 20 mL). The combined organic phase was dried over Na<sub>2</sub>SO<sub>4</sub>. After removal of the solvent, the residue was purified by column chromatography on silica gel using PE/EtOAc (10:1) as the eluent to afford corresponding 1,3-disubstituted indole.

4. M. Kitano, A. Kojima, K. Nakano, A. Miyagishi, T. Noguchi and N. Ohashi, *Chem. Pharm. Bull.* 1999, **47**, 1538.

5. C. N. Rao, D. Lentz and H.-U. Reissig, *Angew. Chem., Int. Ed.* 2015, **54**, 2750.

### Compound 1e

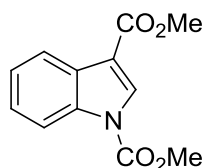

White solid, 2.05 g, 88% yield;  $^1\text{H}$  NMR (400 MHz,  $\text{CDCl}_3$ )  $\delta$  8.27 (s, 1H), 8.18-8.15 (m, 2H), 7.41-7.34 (m, 2H), 4.07 (s, 3H), 3.93 (s, 3H);  $^{13}\text{C}$  NMR (100 MHz,  $\text{CDCl}_3$ )  $\delta$  164.4, 150.8, 135.4, 131.5, 127.3, 125.3, 124.2, 121.6, 115.0, 112.9, 54.3, 51.5; HRMS (ESI) calcd for  $\text{C}_{12}\text{H}_{12}\text{NO}_4$  ( $[\text{M}+\text{H}]^+$ ): 234.0766, found: 234.0763.

### Compound S3

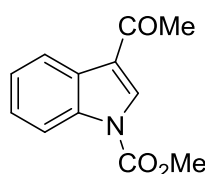

White solid, 1.98 g, 91% yield;  $^1\text{H}$  NMR (400 MHz,  $\text{CDCl}_3$ )  $\delta$  8.38 (d,  $J = 6.8$  Hz, 1H), 8.24 (s, 1H), 8.16 (d,  $J = 7.6$  Hz, 1H), 7.43-7.36 (m, 2H), 4.12 (s, 3H), 2.57 (s, 3H);  $^{13}\text{C}$  NMR (100 MHz,  $\text{CDCl}_3$ )  $\delta$  193.8, 151.0, 135.5, 131.9, 127.2, 125.8, 124.7, 122.7, 121.3, 114.8, 54.5, 27.7; HRMS (ESI) calcd for  $\text{C}_{12}\text{H}_{12}\text{NO}_3$  ( $[\text{M}+\text{H}]^+$ ): 218.0817, found: 218.0811.

### Compound S4

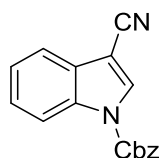

White solid, 2.23 g, 81% yield;  $^1\text{H}$  NMR (400 MHz,  $\text{CDCl}_3$ )  $\delta$  8.21 (d,  $J = 8.0$  Hz, 1H), 8.14 (s, 1H), 7.71 (d,  $J = 8.0$  Hz, 1H), 7.50-7.37 (m, 7H), 5.49 (s, 2H);  $^{13}\text{C}$  NMR (100 MHz,  $\text{CDCl}_3$ )  $\delta$  149.5, 134.3, 134.0, 132.8, 129.2, 128.9, 128.8, 127.9, 126.6, 124.6, 119.9, 115.6, 113.8, 93.3, 69.9; HRMS (ESI) calcd for  $\text{C}_{17}\text{H}_{13}\text{N}_2\text{O}_2$  ( $[\text{M}+\text{H}]^+$ ): 277.0977, found: 277.0974.

### Compound S5

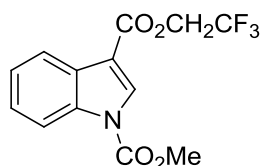

White solid, 2.80 g, 93% yield;  $^1\text{H}$  NMR (400 MHz,  $\text{CDCl}_3$ )  $\delta$  8.37 (s, 1H), 8.21 (d,  $J = 7.6$  Hz, 1H), 8.14 (d,  $J = 7.6$  Hz, 1H), 7.45-7.38 (m, 2H), 4.76-4.70 (m, 2H), 4.11 (s, 3H);  $^{13}\text{C}$  NMR (100 MHz,  $\text{CDCl}_3$ )  $\delta$  162.0, 150.7, 135.5, 132.6, 127.0, 125.8, 124.6,

123.1 (q,  $J = 275.7$  Hz), 121.5, 115.2, 111.3, 60.1 (q,  $J = 36.4$  Hz), 54.6; HRMS (ESI) calcd for  $C_{13}H_{11}F_3NO_4$  ( $[M+H]^+$ ): 302.0640, found: 302.0636.

### Compound S6

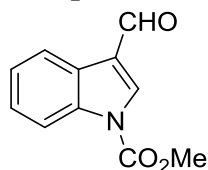

White solid, 1.87 g, 92% yield;  $^1H$  NMR (400 MHz,  $CDCl_3$ )  $\delta$  10.08 (s, 1H), 8.28 (d,  $J = 7.6$  Hz, 1H), 8.22 (s, 1H), 8.16 (d,  $J = 8.0$  Hz, 1H), 7.45-7.36 (m, 2H), 4.11 (s, 3H);  $^{13}C$  NMR (100 MHz,  $CDCl_3$ )  $\delta$  185.7, 150.6, 136.0, 135.8, 126.3, 125.9, 124.8, 122.1, 115.0, 54.6 (two aromatic carbon signals overlap); HRMS (ESI) calcd for  $C_{11}H_9NNaO_3$  ( $[M+Na]^+$ ): 226.0480, found: 226.0479.

### 5. General Procedures for the synthesis of compounds 1f and S7-S10 (GP3)

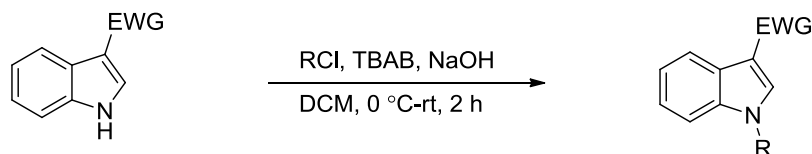

The synthesis of compounds **1f** and **S7-S10** was adapted from the literature procedures.<sup>6</sup> To a 100-mL flask charged with 3-substituted indole (10 mmol, carboxylic esters were prepared according to the GP1), DCM (10 mL), TBAB (0.32 g, 1.0 mmol), and NaOH (0.80 g, 20 mmol) was added corresponding CbzCl (15 mmol, 1.5 equiv), acyl chloride (15 mmol, 1.5 equiv) or TsCl (15 mmol, 1.5 equiv) slowly at 0 °C. The resulting mixture was allowed to warm to room temperature and stir for 3 h. The reaction was then diluted by 1 M HCl (20 mL) and extracted with DCM 3 times (3 X 10 mL). The combined organic phase was dried over  $Na_2SO_4$ . After removal of the solvent, the residue was purified by column chromatography on silica gel using PE/EtOAc (10:1) as the eluent to afford corresponding 1,3-disubstituted indole.

### Compound 1f

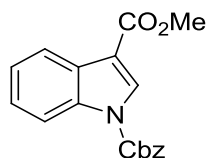

White solid, 2.93 g, 95% yield;  $^1H$  NMR (400 MHz,  $CDCl_3$ )  $\delta$  8.28 (s, 1H), 8.20-8.14 (m, 2H), 7.49-7.32 (m, 7H), 5.46 (s, 2H), 3.91 (s, 3H);  $^{13}C$  NMR (100 MHz,  $CDCl_3$ )  $\delta$  164.4, 150.2, 135.5, 134.4, 131.5, 129.0, 128.8, 128.7, 127.4, 125.4, 124.2, 121.7, 115.1, 113.0, 69.4, 51.5; HRMS (ESI) calcd for  $C_{18}H_{16}NO_4$  ( $[M+H]^+$ ): 310.1079, found: 310.1078.

6. E. Reimann *Pharmazie* 2000, **55**, 907-912.

### Compound S7

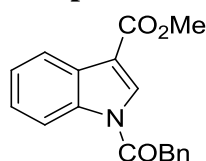

White solid, 2.46 g, 84% yield;  $^1\text{H NMR}$  (400 MHz,  $\text{CDCl}_3$ )  $\delta$  8.47 (d,  $J = 8.4$  Hz, 1H), 8.21 (s, 1H), 8.13 (d,  $J = 7.2$  Hz, 1H), 7.42 - 7.32 (m, 7H), 4.28 (s, 2H), 3.94 (s, 3H);  $^{13}\text{C NMR}$  (100 MHz,  $\text{CDCl}_3$ )  $\delta$  169.5, 164.3, 136.1, 132.5, 130.7, 129.1, 129.0, 127.7, 127.2, 126.1, 124.9, 121.5, 116.6, 114.0, 51.6, 42.6; HRMS (ESI) calcd for  $\text{C}_{18}\text{H}_{16}\text{NO}_3$  ( $[\text{M}+\text{H}]^+$ ): 294.1130, found: 294.1126.

### Compound S8

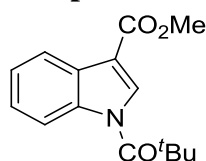

White solid, 1.86 g, 72% yield;  $^1\text{H NMR}$  (400 MHz,  $\text{CDCl}_3$ )  $\delta$  8.48 (d,  $J = 8.0$  Hz, 1H), 8.42 (s, 1H), 8.16 (d,  $J = 7.6$  Hz, 1H), 7.43-7.36 (m, 2H), 3.96 (s, 3H), 1.55 (s, 9H);  $^{13}\text{C NMR}$  (100 MHz,  $\text{CDCl}_3$ )  $\delta$  177.2, 164.6, 137.2, 131.5, 126.4, 125.9, 124.6, 121.2, 117.1, 112.9, 51.6, 41.6, 28.7; HRMS (ESI) calcd for  $\text{C}_{15}\text{H}_{18}\text{NO}_3$  ( $[\text{M}+\text{H}]^+$ ): 260.1287, found: 260.1281.

### Compound S9

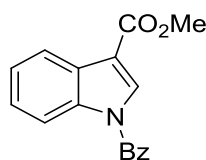

White solid, 2.18 g, 78% yield;  $^1\text{H NMR}$  (400 MHz,  $\text{CDCl}_3$ )  $\delta$  8.39 (d,  $J = 8.0$  Hz, 1H), 8.20 (d,  $J = 7.2$  Hz, 1H), 7.99 (s, 1H), 7.76 (d,  $J = 7.6$  Hz, 2H), 7.68-7.65 (m, 1H), 7.59-7.55 (m, 2H), 7.46-7.41 (m, 2H), 3.91 (s, 3H);  $^{13}\text{C NMR}$  (100 MHz,  $\text{CDCl}_3$ )  $\delta$  168.6, 164.4, 136.3, 133.4, 133.3, 132.7, 129.4, 128.9, 127.6, 125.7, 125.0, 121.6, 116.2, 113.2, 51.6; HRMS (ESI) calcd for  $\text{C}_{17}\text{H}_{13}\text{NNaO}_3$  ( $[\text{M}+\text{Na}]^+$ ): 302.0793, found: 302.0787.

### Compound S10

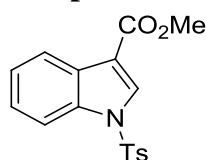

White solid, 2.30 g, 70% yield;  $^1\text{H NMR}$  (400 MHz,  $\text{CDCl}_3$ )  $\delta$  8.28 (s, 1H), 8.13 (d,  $J = 7.6$  Hz, 1H), 7.97 (d,  $J = 7.6$  Hz, 1H), 7.82 (d,  $J = 7.2$  Hz, 2H), 7.38-7.31 (m, 2H), 7.24 (d,  $J = 7.6$  Hz, 2H), 3.92 (s, 3H), 2.33 (s, 3H);  $^{13}\text{C NMR}$  (100 MHz,  $\text{CDCl}_3$ )  $\delta$  164.0, 145.7, 134.7, 134.5, 132.0, 130.1, 127.7, 127.0, 125.3, 124.3, 122.0, 113.4,

113.2, 51.5, 21.5; HRMS (ESI) calcd for C<sub>17</sub>H<sub>16</sub>NO<sub>4</sub>S ([M+H]<sup>+</sup>): 330.0800, found: 330.0797.

**6. Table S1. Initial Survey of Copper-catalyzed Dearomative Borylation Using Achiral ligand (dppe).**

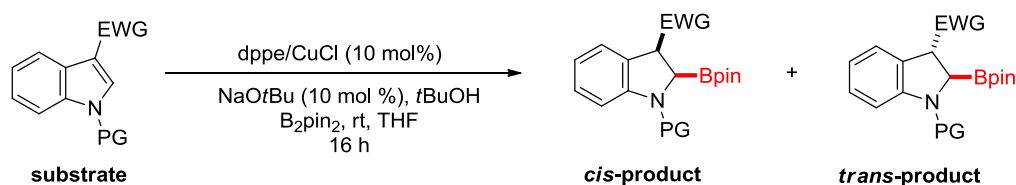

| To entry  | substrate  | PG, EWG                                                             | results                           |
|-----------|------------|---------------------------------------------------------------------|-----------------------------------|
| 1         | <b>S2</b>  | Me, CO <sub>2</sub> Me                                              | no reaction                       |
| 2         | <b>S3</b>  | CO <sub>2</sub> Me, COMe                                            | yes, major <i>trans</i> -product. |
| 3         | <b>S4</b>  | Cbz, CN                                                             | no reaction                       |
| 4         | <b>S5</b>  | CO <sub>2</sub> Me, CO <sub>2</sub> CH <sub>2</sub> CF <sub>3</sub> | yes, major <i>trans</i> -product  |
| 5         | <b>S6</b>  | CO <sub>2</sub> Me, CHO                                             | messy                             |
| 6         | <b>S7</b>  | COBn, CO <sub>2</sub> Me                                            | trace                             |
| 7         | <b>S8</b>  | COtBu, CO <sub>2</sub> Me                                           | trace                             |
| 8         | <b>S9</b>  | Bz, CO <sub>2</sub> Me                                              | trace                             |
| 9         | <b>S10</b> | Ts, CO <sub>2</sub> Me                                              | no reaction                       |
| <b>10</b> | <b>1a</b>  | <i>Boc</i> , CO <sub>2</sub> Me                                     | <i>yes, major cis</i> -product    |
| 11        | <b>1e</b>  | CO <sub>2</sub> Me, CO <sub>2</sub> Me                              | yes, major <i>trans</i> -product  |
| 12        | <b>1f</b>  | Cbz, CO <sub>2</sub> Me                                             | yes, major <i>trans</i> -product  |

**Conclusions:** 1) When indole substrate bearing electron-withdrawing group such as acyl, formyl, or alkoxy carbonyl in its 3-position was used, alkoxy carbonyl substitution in nitrogen was responsible for the reaction to take place; 2) In the presence of achiral ligand dppe, only substrate **1a** could give *cis*-product preferentially; 3) *Trans*-product was not stable towards isolation by chromatography on either silica gel or alumina whereas *cis*-one was isolable.

Therefore, we chose indole **1a** as model substrate to further evaluate reactivity and stereoselectivity in the presence of chiral catalyst.

**7. General procedures for the catalytic asymmetric dearomative borylation of indole 1**

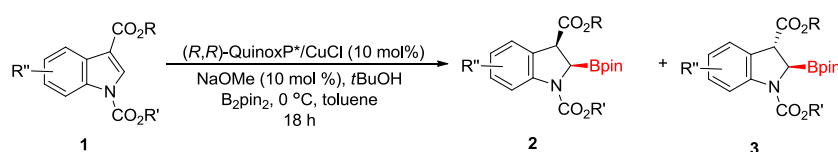

In a nitrogen-filled glovebox, to a 25-mL flame-dried Schlenk tube charged with CuCl (2.0 mg, 0.02 mmol), NaOMe (1.1 mg, 0.02 mmol) and (*R,R*)-QuinoxP\* (6.7 mg, 0.02 mmol) was added toluene (0.5 mL). The resulting mixture was allowed to

stir at room temperature for 0.5 h. B<sub>2</sub>pin<sub>2</sub> (0.30 mmol in 0.5 mL) was then introduced and the reaction was allowed to stir at room temperature for 10 min followed by addition of indole **1** (0.20 mmol in 1 mL toluene) and *t*BuOH (37.5 μL, 0.4 mmol) at 0 °C. The resulting mixture was continued to stir at 0 °C for 18-48 hours. After removal of the solvent, the <sup>1</sup>H NMR of crude mixture was taken to determine the d.r. value. The residue was purified by column chromatography on silica gel using PE/EtOAc (12:1) as the eluent to affording corresponding 2-boryl indoline **2** or **3**.

### Compound 2a

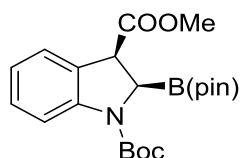

Colorless oil, 70.9 mg, 88% yield, 95:5 *d.r.*, 86% *ee*,  $[\alpha]_D^{25} = -57.7$  (*c* 0.40, CHCl<sub>3</sub>). <sup>1</sup>H NMR (400 MHz, CDCl<sub>3</sub>) δ 7.49 (brs, 1H), 7.27-7.17 (m, 2H), 6.93-6.90 (m, 1H), 4.44 (brs, 1H), 4.11 (d, *J* = 11.6 Hz, 1H), 3.74 (s, 3H), 1.58 (s, 9H), 1.31 (s, 6H), 1.30 (s, 6H); <sup>13</sup>C NMR (100 MHz, CDCl<sub>3</sub>) δ 172.4, 152.4, 142.1, 128.6, 128.3, 125.1, 121.8, 114.8, 83.8, 81.4, 52.4, 48.8, 47.2, 28.3, 25.3, 24.7; <sup>11</sup>B NMR (128 MHz, CDCl<sub>3</sub>) δ 31.6; HRMS (ESI) calcd for C<sub>21</sub>H<sub>31</sub>BNO<sub>6</sub> ([M+H]<sup>+</sup>): 404.2244, found: 404.2245. The enantiopurity was determined by HPLC analysis (Daicel Chiralpak IE column, Hexane/*i*PrOH = 98: 2, flow rate = 1.0 mL/min., wavelength = 230 nm, *t*<sub>R</sub> = 13.09 (minor), 15.85 (major)).

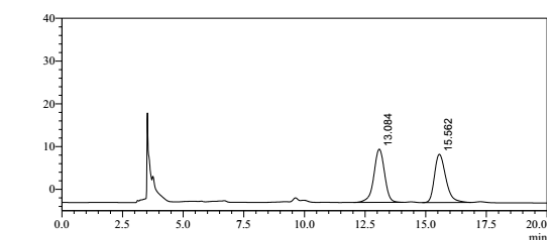

| Peak ID | Ret. Time | Height | Area   | Area%   |
|---------|-----------|--------|--------|---------|
| 1       | 13.084    | 12441  | 382199 | 51.065  |
| 2       | 15.562    | 11280  | 366262 | 48.935  |
| Total   |           |        |        | 100.000 |

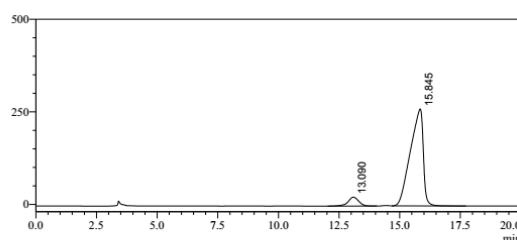

| Peak ID | Ret. Time | Height | Area    | Area%   |
|---------|-----------|--------|---------|---------|
| 1       | 13.090    | 23995  | 735536  | 7.036   |
| 2       | 15.845    | 261743 | 9718475 | 92.964  |
| Total   |           |        |         | 100.000 |

### Compound 2b

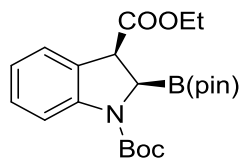

Colorless oil, 72.6 mg, 87% yield, 95:5 *d.r.*, 93% *ee*  $[\alpha]_D^{25} = -66.5$  (*c* 0.2, CHCl<sub>3</sub>). <sup>1</sup>H NMR (400 MHz, CDCl<sub>3</sub>) δ 7.50 (brs, 1H), 7.28 (d, *J* = 7.2 Hz, 1H), 7.20-7.17 (m, 1H), 6.92-6.89 (m, 1H), 4.47 (d, *J* = 11.2 Hz, 1H), 4.21 (q, *J* = 7.2 Hz, *J* = 14.0 Hz, 2H), 4.11 (d, *J* = 12.0 Hz, 1H), 1.58 (s, 9H), 1.32-1.26 (m, 15H); <sup>13</sup>C NMR (100 MHz, CDCl<sub>3</sub>) δ 172.0, 152.4, 142.3, 128.5, 128.3, 124.8, 121.8, 115.1, 83.8, 81.2, 61.4, 48.6, 47.5, 28.3, 25.3, 24.8, 14.1; <sup>11</sup>B NMR (128 MHz, CDCl<sub>3</sub>) δ 31.6; HRMS (ESI) calcd for C<sub>22</sub>H<sub>32</sub>BNNaO<sub>6</sub> ([M+Na]<sup>+</sup>): 440.2220, found: 440.2216. The enantiopurity was

determined by HPLC analysis (Daicel Chiralpak IE column, Hexane/*i*PrOH = 98: 2, flow rate = 1.0 mL/min., wavelength = 254 nm,  $t_R$  = 13.11 (minor), 16.61 (major).

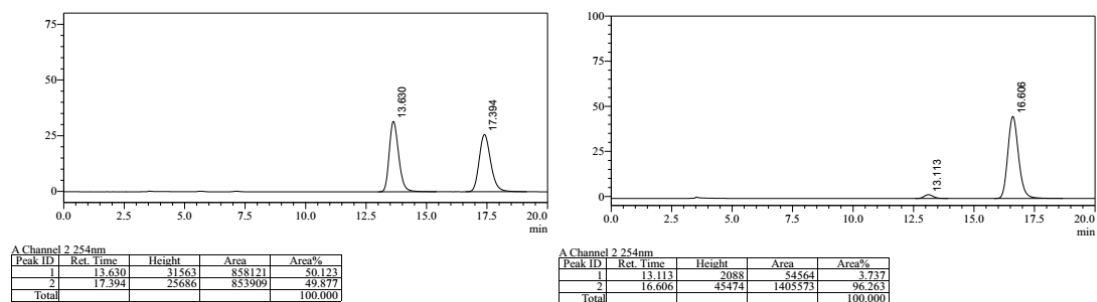

### Compound 2c

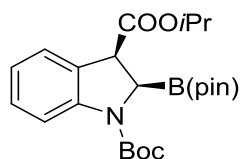

Colorless oil, 75.0 mg, 87% yield, 95:5 *d.r.*, 95% *ee*,  $[\alpha]_D^{25} = -66.3$  (*c* 0.15, CHCl<sub>3</sub>). <sup>1</sup>H NMR (400 MHz, CDCl<sub>3</sub>)  $\delta$  7.51 (brs, 1H), 7.29 (d, *J* = 7.6 Hz, 1H), 7.20-7.16 (m, 1H), 6.91-6.88 (m, 1H), 5.07-5.01 (m, 1H), 4.44 (d, *J* = 12.0 Hz, 1H), 4.10 (d, *J* = 12.0 Hz, 1H), 1.58 (s, 9H), 1.32-1.25 (m, 18H); <sup>13</sup>C NMR (100 MHz, CDCl<sub>3</sub>)  $\delta$  171.6, 152.4, 142.3, 128.5, 128.3, 124.7, 121.7, 115.0, 83.8, 81.2, 69.2, 48.7, 47.8, 28.4, 25.3, 24.9, 21.8, 21.7; <sup>11</sup>B NMR (128 MHz, CDCl<sub>3</sub>)  $\delta$  31.8; HRMS (ESI) calcd for C<sub>23</sub>H<sub>34</sub>BNNaO<sub>6</sub> ([M+Na]<sup>+</sup>): 454.2377, found: 454.2376. The enantiopurity was determined by HPLC analysis (Daicel Chiralpak IE column, Hexane/*i*PrOH = 98:2, flow rate = 1.0 mL/min., wavelength = 254 nm,  $t_R$  = 11.11 (minor), 14.56 (major).

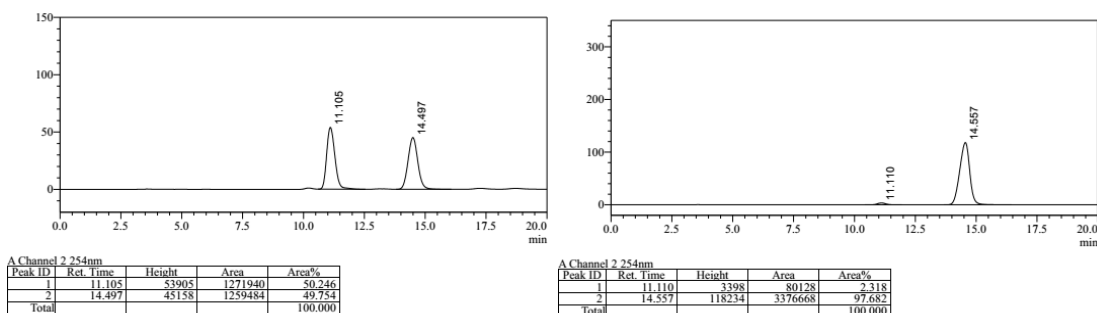

### Compound 2d

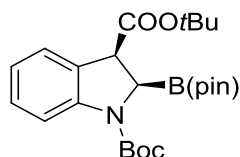

Colorless oil, 80.1 mg, 90% yield, 96:4 *d.r.*, 91% *ee*,  $[\alpha]_D^{25} = -30.9$  (*c* 0.19, CHCl<sub>3</sub>). <sup>1</sup>H NMR (400 MHz, CDCl<sub>3</sub>)  $\delta$  7.51 (s, 1H), 7.30 (d, *J* = 7.2 Hz, 1H), 7.19-7.15 (m, 1H), 6.91-6.87 (m, 1H), 4.41 (d, *J* = 12.0 Hz, 1H), 4.06 (d, *J* = 12.0 Hz, 1H), 1.57 (s, 9H), 1.47 (s, 9H), 1.33 (s, 6H), 1.31 (s, 6H); <sup>13</sup>C NMR (100 MHz, CDCl<sub>3</sub>)  $\delta$  171.2, 152.2, 141.9, 128.3, 124.5, 121.5, 114.9, 83.5, 81.8, 80.8, 48.4, 28.2, 27.8, 25.2, 24.7



(two aromatic carbons overlap; *B*-adjacent carbon overlaps with C3-carbon);  $^{11}\text{B}$  NMR (128 MHz,  $\text{CDCl}_3$ )  $\delta$  31.5; HRMS (ESI) calcd for  $\text{C}_{24}\text{H}_{36}\text{BNNaO}_6$  ( $[\text{M}+\text{Na}]^+$ ): 468.2535, found: 468.2531. The enantiopurity was determined by HPLC analysis (Daicel Chiralpak IE column, Hexane/*i*PrOH = 98:2, flow rate = 1.0 mL/min., wavelength = 254 nm,  $t_{\text{R}}$  = 10.13 (minor), 14.21 (major).

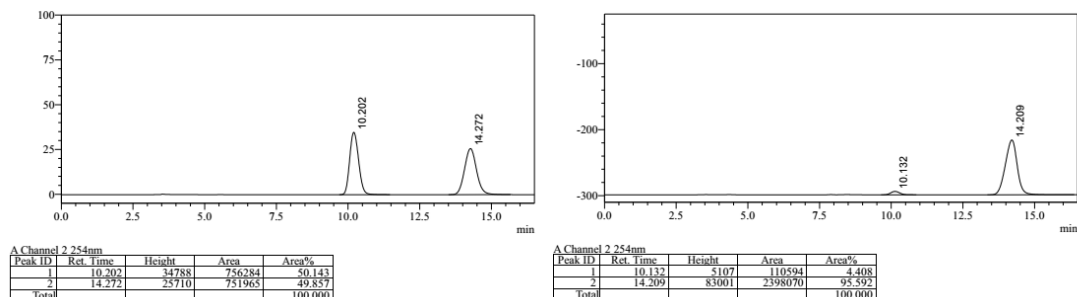

### Compound 2e

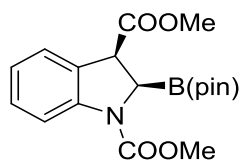

Colorless oil, 54.1 mg, 75% yield, 90:10 *d.r.*, 78% *ee*,  $[\alpha]_D^{25} = -9.2$  (*c* 0.2,  $\text{CHCl}_3$ ).  $^1\text{H}$  NMR (400 MHz,  $\text{CDCl}_3$ )  $\delta$  7.93 (brs, 1H), 7.29-7.21 (m, 2H), 6.97 - 6.94 (m, 1H), 4.50 (s, 1H), 4.12 (d,  $J = 11.6$  Hz, 1H), 3.81 (s, 3H), 3.75 (s, 3H), 1.31 (s, 6H), 1.30 (s, 6H).  $^{13}\text{C}$  NMR (100 MHz,  $\text{CDCl}_3$ )  $\delta$  172.4, 153.3, 142.8, 128.8, 127.5, 124.6, 122.4, 115.1, 84.0, 60.3, 52.6, 48.4, 25.2, 24.8 (*B*-adjacent carbon overlaps with C3-carbon);  $^{11}\text{B}$  NMR (128 MHz,  $\text{CDCl}_3$ )  $\delta$  31.9; HRMS (ESI) calcd for  $\text{C}_{18}\text{H}_{24}\text{BNNaO}_6$  ( $[\text{M}+\text{Na}]^+$ ): 384.1594, found: 384.1592. The enantiopurity was determined by HPLC analysis (Daicel Chiralpak IC column, Hexane/*i*PrOH = 90:10, flow rate = 1.0 mL/min., wavelength = 254 nm,  $t_{\text{R}}$  = 12.68 (major), 14.28 (minor).

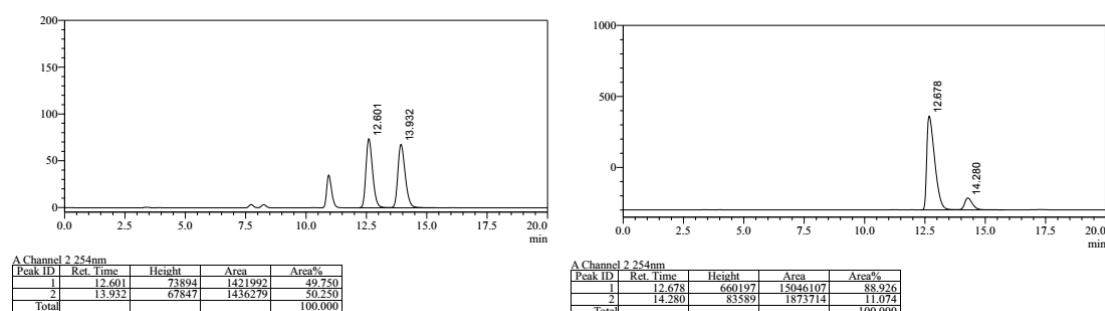

### Compound 2f

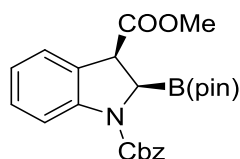

White solid, 66.4 mg, 76% yield, 95:5 *d.r.*, 68% *ee*,  $[\alpha]_D^{25} = -49.2$  (*c* 0.24, CHCl<sub>3</sub>). <sup>1</sup>H NMR (400 MHz, CDCl<sub>3</sub>) δ 7.95-7.41 (m 1H), 7.41-7.28 (m, 7H), 6.94 (s, 1H), 5.39-5.07 (m, 2H), 4.50 (brs, 1H), 4.20 (brs, 1H), 3.74 (s, 3H), 1.18 (brs, 12H); <sup>13</sup>C NMR (100 MHz, CDCl<sub>3</sub>) δ 172.3, 152.8, 142.7, 136.0, 128.8, 128.4, 127.9, 127.7, 125.3, 124.5, 122.5, 115.3, 84.0, 66.9, 52.5, 48.5, 47.4, 25.1, 24.7; <sup>11</sup>B NMR (128 MHz, CDCl<sub>3</sub>) δ 31.8; HRMS (ESI) calcd for C<sub>24</sub>H<sub>29</sub>BNO<sub>6</sub> ([M+H]<sup>+</sup>): 438.2088, found: 438.2090; The enantiopurity was determined by HPLC analysis (Daicel Chiralpak IC column, Hexane/*i*PrOH = 90: 10, flow rate = 1.0 mL/min., wavelength = 254 nm, *t*<sub>R</sub> = 14.25 (major), 15.42 (minor).

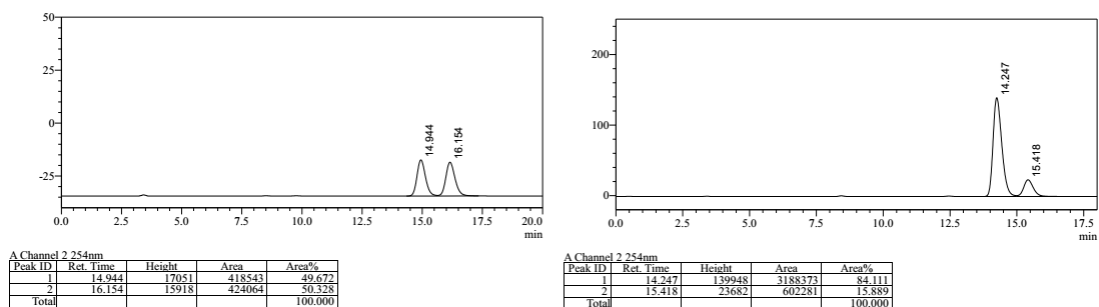

## Compound 2g

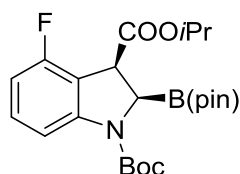

Colorless oil, 83.5 mg, 93% yield, >98:2 *d.r.*, 94% *ee*,  $[\alpha]_D^{25} = -73.8$  (*c* 0.14, CHCl<sub>3</sub>). <sup>1</sup>H NMR (400 MHz, CDCl<sub>3</sub>) δ 7.53 (brs, 1H), 7.18-7.13 (m, 1H), 6.64-6.59 (m, 1H), 5.04-5.01 (m, 1H), 4.45 (d, *J* = 10.0 Hz, 1H), 4.16 (d, *J* = 12.0 Hz, 1H), 1.57 (s, 9H), 1.30-1.22 (m, 18H); <sup>13</sup>C NMR (100 MHz, CDCl<sub>3</sub>) δ 171.2, 159.1 (d, *J* = 245.6 Hz), 152.1, 145.0, 130.3 (d, *J* = 8.1 Hz), 115.7 (d, *J* = 17.9 Hz), 110.6, 108.7 (d, *J* = 20.2 Hz), 84.0, 81.7, 69.1, 50.0, 44.9, 28.3, 25.2, 24.7, 21.6, 21.4; <sup>11</sup>B NMR (128 MHz, CDCl<sub>3</sub>) δ 31.5 ppm; HRMS (ESI) calcd for C<sub>23</sub>H<sub>33</sub>BFNNaO<sub>6</sub> ([M+Na]<sup>+</sup>): 472.2283, found: 472.2290. The enantiopurity was determined by HPLC analysis (Daicel Chiralpak IE column, Hexane/*i*PrOH = 98:2, flow rate = 1.0 mL/min., wavelength = 254 nm, *t*<sub>R</sub> = 8.44 (minor), 9.59 (major).

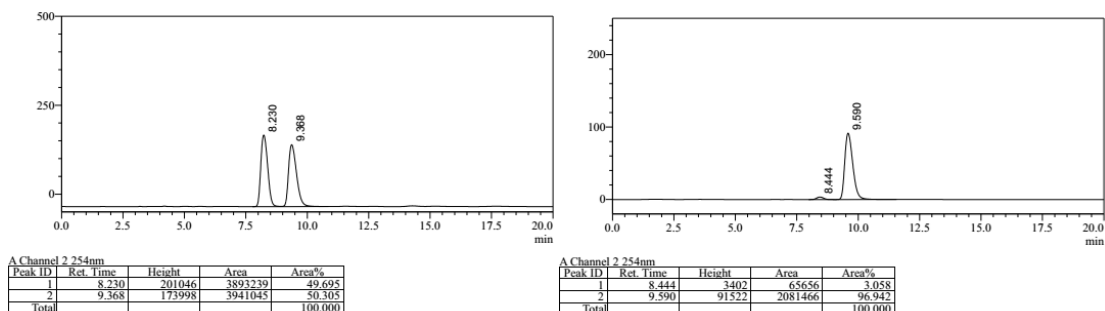

## Compound 2h

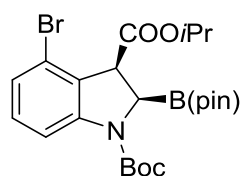

Colorless oil, 65.4 mg, 64% yield, 94:6 *d.r.*, 93% *ee*,  $[\alpha]_D^{25} = -17.5$  (*c* 0.16, CHCl<sub>3</sub>). <sup>1</sup>H NMR (400 MHz, CDCl<sub>3</sub>)  $\delta$  7.42 (brs, 1H), 7.07-7.06 (m, 2H), 5.01 (s, 1H), 4.27 (brs, 1H), 4.09 (brs, 1H), 1.57 (s, 9H), 1.29-1.23 (m, 18H); <sup>13</sup>C NMR (100 MHz, CDCl<sub>3</sub>)  $\delta$  170.5, 152.5, 140.0, 130.6, 130.0, 125.0, 120.2, 113.5, 84.2, 82.2, 69.0, 49.1, 49.0, 28.3, 25.4, 24.6, 21.6, 21.5; <sup>11</sup>B NMR (128 MHz, CDCl<sub>3</sub>)  $\delta$  31.1; HRMS (ESI) calcd for C<sub>23</sub>H<sub>33</sub>B<sup>81</sup>BrNNaO<sub>6</sub> ([M+Na]<sup>+</sup>): 534.1462, found: 534.1464. The enantiopurity was determined by HPLC analysis (Daicel Chiralpak IE column, Hexane/*i*PrOH = 98:2, flow rate = 1.0 mL/min., wavelength = 254 nm, *t*<sub>R</sub> = 9.63 (minor), 11.91 (major)).

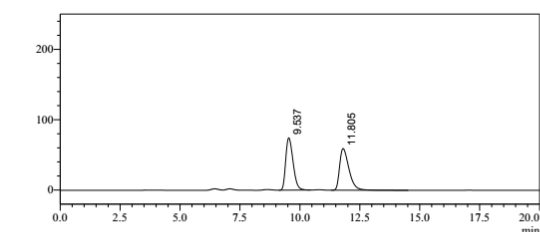

| Peak ID | Ret. Time | Height | Area    | Area%   |
|---------|-----------|--------|---------|---------|
| 1       | 9.537     | 74289  | 1589982 | 49.704  |
| 2       | 11.805    | 59218  | 1608896 | 50.296  |
| Total   |           |        |         | 100.000 |

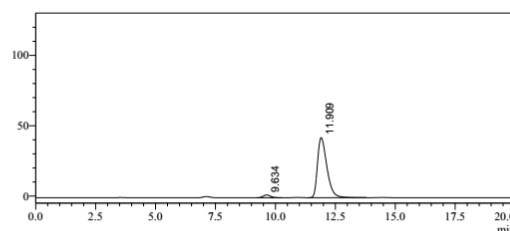

| Peak ID | Ret. Time | Height | Area    | Area%   |
|---------|-----------|--------|---------|---------|
| 1       | 9.634     | 1933   | 41372   | 3.427   |
| 2       | 11.909    | 42664  | 1166028 | 96.573  |
| Total   |           |        |         | 100.000 |

## Compound 2i

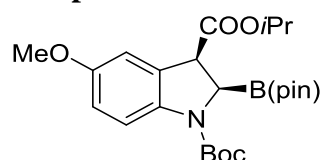

Colorless oil, 77.4 mg, 84% yield, 95:5 *d.r.*, 95% *ee*,  $[\alpha]_D^{25} = -46.6$  (*c* 0.38, CHCl<sub>3</sub>). <sup>1</sup>H NMR (400 MHz, CDCl<sub>3</sub>)  $\delta$  7.39 (s, 1H), 6.88 (s, 1H), 6.75-6.72 (m, 1H), 5.08-5.02 (m, 1H), 4.42 (d, *J* = 11.6 Hz, 1H), 4.10 (d, *J* = 12.0 Hz, 1H), 3.74 (s, 3H), 1.56 (s, 9H), 1.32-1.27 (m, 18H); <sup>13</sup>C NMR (100 MHz, CDCl<sub>3</sub>)  $\delta$  171.4, 155.0, 152.3, 136.0, 129.5, 115.5, 113.7, 110.7, 83.8, 81.0, 69.2, 55.6, 48.9, 47.8, 28.4, 25.3, 24.8, 21.8(2), 21.8(0); <sup>11</sup>B NMR (128 MHz, CDCl<sub>3</sub>)  $\delta$  30.5; HRMS (ESI) calcd for C<sub>24</sub>H<sub>37</sub>BNO<sub>7</sub> ([M+H]<sup>+</sup>): 462.2663, found: 462.2665. The enantiopurity was determined by HPLC analysis (Daicel Chiralpak IC column, Hexane/*i*PrOH = 90:10, flow rate = 1.0 mL/min., wavelength = 254 nm, *t*<sub>R</sub> = 5.31 (major), 6.32 (minor)).

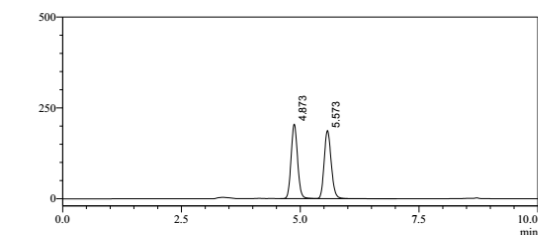

| Peak ID | Ret. Time | Height | Area    | Area%   |
|---------|-----------|--------|---------|---------|
| 1       | 4.873     | 205064 | 1949896 | 50.130  |
| 2       | 5.573     | 187695 | 1939776 | 49.870  |
| Total   |           |        |         | 100.000 |

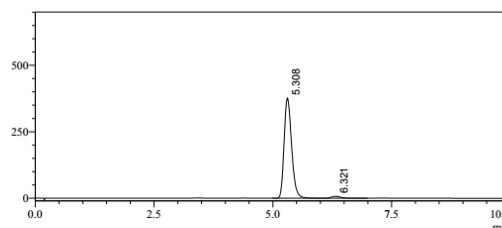

| Peak ID | Ret. Time | Height | Area    | Area%   |
|---------|-----------|--------|---------|---------|
| 1       | 5.308     | 376486 | 4187665 | 97.554  |
| 2       | 6.321     | 7279   | 104258  | 2.446   |
| Total   |           |        |         | 100.000 |

## Compound 2j

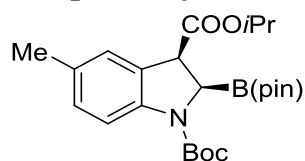

Colorless oil, 81.0 mg, 91% yield, 97:3 *d.r.*, 96% *ee*,  $[\alpha]_D^{25} = -39.7$  (*c* 0.08, CHCl<sub>3</sub>). <sup>1</sup>H NMR (400 MHz, CDCl<sub>3</sub>) δ 7.36 (s, 1H), 7.08 (s, 1H), 6.98 (d, *J* = 8.0 Hz, 1H), 5.07-5.01(m, 1H), 4.40 (d, *J* = 11.6 Hz, 1H), 4.09 (d, *J* = 12.0 Hz, 1H), 2.26 (s, 3H), 1.57 (s, 9H), 1.32-1.26 (m, 18H); <sup>13</sup>C NMR (100 MHz, CDCl<sub>3</sub>) δ 171.7, 152.4, 139.9, 131.1, 129.0, 128.5, 125.3, 114.7, 83.7, 81.1, 69.1, 48.7, 47.8, 28.4, 25.3, 24.9, 21.8, 21.7, 20.8; <sup>11</sup>B NMR (128 MHz, CDCl<sub>3</sub>) δ 31.8; HRMS (ESI) calcd for C<sub>24</sub>H<sub>37</sub>BNO<sub>6</sub> ([M+H]<sup>+</sup>): 446.2714, found: 446.2710. The enantiopurity was determined by HPLC analysis (Daicel Chiralpak IE column, Hexane/*i*PrOH = 98:2, flow rate = 1.0 mL/min., wavelength = 254 nm, *t*<sub>R</sub> = 14.48 (minor), 16.10 (major)).

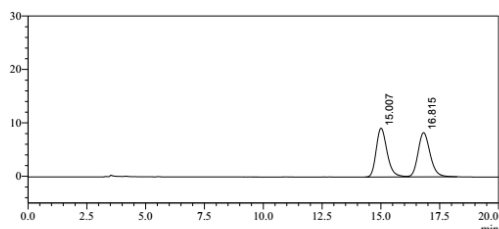

| Peak ID | Ret. Time | Height | Area   | Area%   |
|---------|-----------|--------|--------|---------|
| 1       | 15.007    | 9134   | 294351 | 49.857  |
| 2       | 16.815    | 8281   | 296039 | 50.143  |
| Total   |           |        |        | 100.000 |

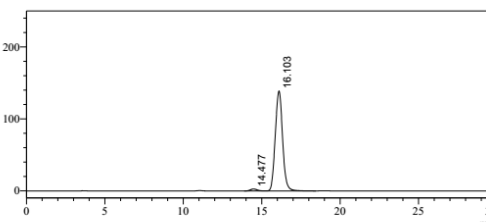

| Peak ID | Ret. Time | Height | Area    | Area%   |
|---------|-----------|--------|---------|---------|
| 1       | 14.477    | 2753   | 84206   | 1.829   |
| 2       | 16.103    | 139084 | 4518703 | 98.171  |
| Total   |           |        |         | 100.000 |

## Compound 2k

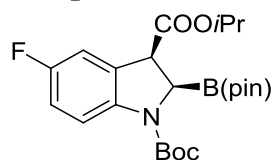

Colorless oil, 60.2 mg, 67% yield, 85:15 *d.r.*, 93% *ee*,  $[\alpha]_D^{25} = -32.8$  (*c* 0.14, CHCl<sub>3</sub>). <sup>1</sup>H NMR (400 MHz, CDCl<sub>3</sub>) δ 7.41 (brs, 1H), 7.01 (d, *J* = 6.8 Hz, 1H), 6.90-6.86 (m, 1H), 5.07-5.02 (m, 1H), 4.42 (d, *J* = 11.6 Hz, 1H), 4.13 (d, *J* = 12.0 Hz, 1H), 1.57 (s, 9H), 1.32-1.27(m, 18H); <sup>13</sup>C NMR (100 MHz, CDCl<sub>3</sub>) δ 171.0, 158.2 (d, *J* = 238.1 Hz), 152.2, 138.4, 129.8, 115.5, 114.9 (d, *J* = 22.7 Hz), 112.1, 83.9, 81.4, 69.6, 49.0, 47.6, 28.3, 25.3, 24.8, 21.8; <sup>11</sup>B NMR (128 MHz, CDCl<sub>3</sub>) δ 31.3; HRMS (ESI) calcd for C<sub>23</sub>H<sub>34</sub>BFNO<sub>6</sub> ([M+H]<sup>+</sup>): 450.2463, found: 450.2462. The enantiopurity was

determined by HPLC analysis (Daicel Chiralpak IE column, Hexane/*i*PrOH = 98:2, flow rate = 1.0 mL/min., wavelength = 254 nm,  $t_R$  = 8.59 (minor), 11.70 (major).

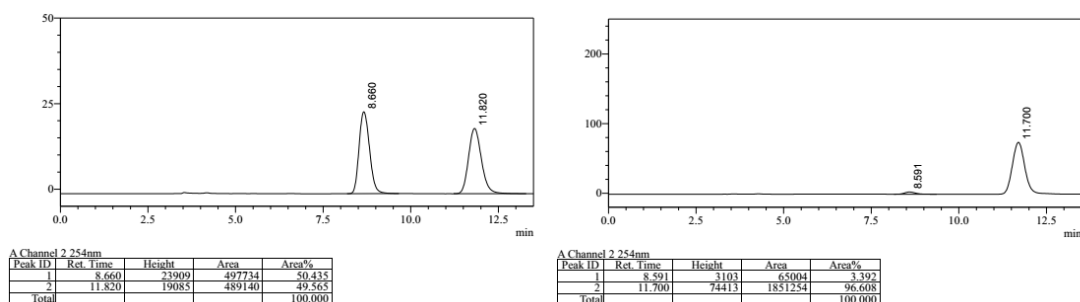

## Compound 2l

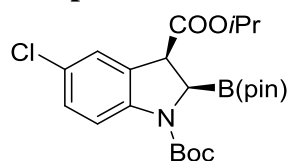

Colorless oil, 77.2 mg, 83% yield, 94:6 *d.r.*, 95% *ee*,  $[\alpha]_D^{25} = -25.0$  (*c* 0.20, CHCl<sub>3</sub>). <sup>1</sup>H NMR (400 MHz, CDCl<sub>3</sub>)  $\delta$  7.35 (s, 1H), 7.25 (s, 1H), 7.14 (d, *J* = 8.4 Hz, 1H), 5.08-5.02 (m, 1H), 4.41 (d, *J* = 11.6 Hz, 1H), 4.12 (d, *J* = 12.0 Hz, 1H), 1.57 (s, 9H), 1.32-1.27 (m, 18H); <sup>13</sup>C NMR (100 MHz, CDCl<sub>3</sub>)  $\delta$  171.0, 152.1, 140.8, 130.0, 128.5, 126.6, 124.9, 115.9, 83.9, 81.6, 69.6, 49.1, 47.6, 28.3, 25.3, 25.0, 21.8; <sup>11</sup>B NMR (128 MHz, CDCl<sub>3</sub>)  $\delta$  31.4; HRMS (ESI) calcd for C<sub>23</sub>H<sub>33</sub>BClNO<sub>6</sub> ([M+Na]<sup>+</sup>): 488.1987, found: 488.1982. The enantiopurity was determined by HPLC analysis (Daicel Chiralpak IE column, Hexane/*i*PrOH = 98:2, flow rate = 1.0 mL/min., wavelength = 254 nm,  $t_R$  = 8.62 (minor), 10.67 (major).

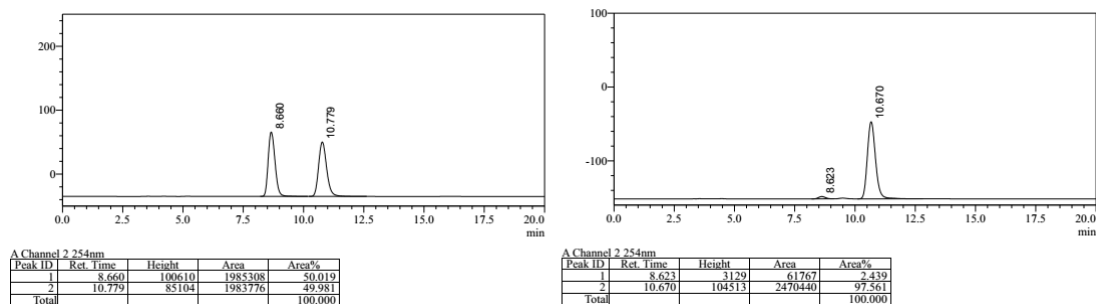

## Compound 2m

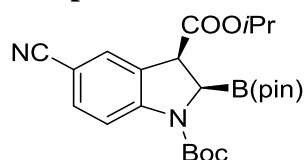

Colorless oil, 45.6 mg, 50% yield, 71:29 *d.r.*, 85% *ee*,  $[\alpha]_D^{25} = -57.1$  (*c* 0.14, CHCl<sub>3</sub>). <sup>1</sup>H NMR (400 MHz, CDCl<sub>3</sub>)  $\delta$  7.84 (brs, 1H), 7.56 (s, 1H), 7.50 (d, *J* = 7.6 Hz, 1H), 5.10-5.03 (m, 1H), 4.44 (d, *J* = 12.4 Hz, 1H), 4.16 (d, *J* = 12.0 Hz, 1H), 1.58 (s, 9H), 1.32-1.27 (m, 18H); <sup>13</sup>C NMR (100 MHz, CDCl<sub>3</sub>)  $\delta$  170.5, 151.7, 145.7, 133.6, 129.4,, 128.5, 119.4, 115.2, 104.4, 84.0, 82.5, 70.0, 49.2, 47.3, 28.2, 25.2, 24.9, 21.7; <sup>11</sup>B

NMR (128 MHz, CDCl<sub>3</sub>)  $\delta$  31.2 ppm; HRMS (ESI) calcd for C<sub>24</sub>H<sub>33</sub>BN<sub>2</sub>NaO<sub>6</sub> ([M+Na]<sup>+</sup>): 479.2329, found: 479.2332. The enantiopurity was determined by HPLC analysis (Daicel Chiralpak IE column, Hexane/*i*PrOH = 90: 10, flow rate = 1.0 mL/min., wavelength = 254 nm,  $t_R$  = 11.06 (minor), 15.86 (major)).

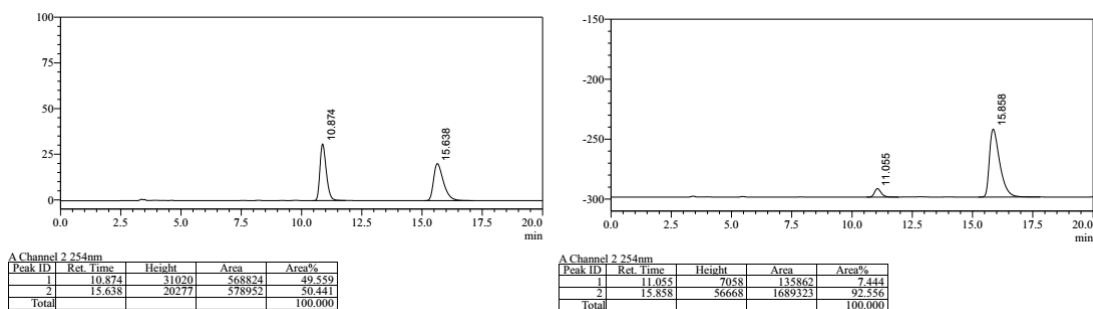

## Compound 2n

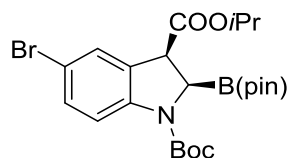

Colorless oil, 89.9 mg, 88% yield, 95:5 *d.r.*, 94% *ee*,  $[\alpha]_D^{25} = -20.0$  (*c* 0.76, CHCl<sub>3</sub>). <sup>1</sup>H NMR (400 MHz, CDCl<sub>3</sub>)  $\delta$  7.70-7.27 (m, 3H), 5.08-5.02 (m, 1H), 4.41 (d, *J* = 12.0 Hz, 1H), 4.11 (d, *J* = 12.0 Hz, 1H), 1.57 (s, 9H), 1.31-1.26(m, 18H); <sup>13</sup>C NMR (100 MHz, CDCl<sub>3</sub>)  $\delta$  171.0, 152.1, 141.4, 131.4, 130.5, 127.8, 116.4, 113.9, 83.9, 81.7, 69.6, 49.0, 47.5, 28.3, 25.3, 25.0, 21.8; <sup>11</sup>B NMR (128 MHz, CDCl<sub>3</sub>)  $\delta$  31.4; HRMS (ESI) calcd for C<sub>23</sub>H<sub>33</sub>B<sup>81</sup>BrNNaO<sub>6</sub> ([M+Na]<sup>+</sup>): 534.1462, found: 534.1466. The enantiopurity was determined by HPLC analysis (Daicel Chiralpak IE column, Hexane/*i*PrOH = 98:2, flow rate = 1.0 mL/min., wavelength = 254 nm,  $t_R$  = 9.46 (minor), 11.15 (major)).

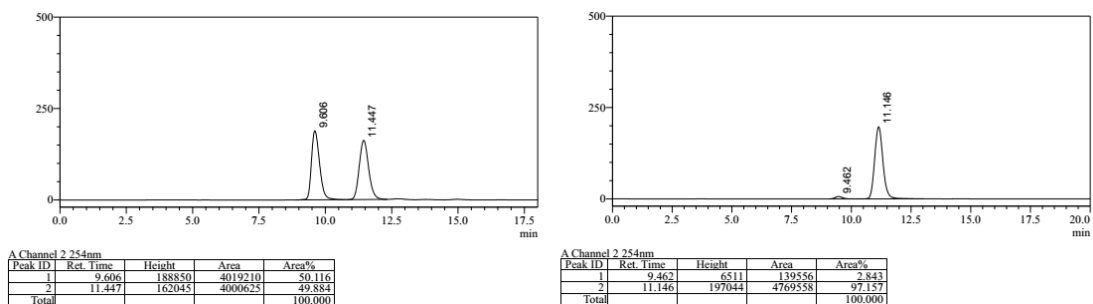

## Compound 2o

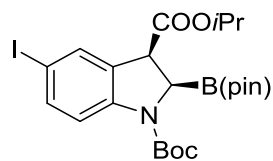

Colorless oil, 95.8 mg, 86% yield, 97:3 *d.r.*, 94% *ee*,  $[\alpha]_D^{25} = -4.0$  (*c* 0.30, CHCl<sub>3</sub>). <sup>1</sup>H NMR (400 MHz, CDCl<sub>3</sub>)  $\delta$  7.58 (s, 1H), 7.46 (d, *J* = 8.0 Hz, 1H), 7.27 (brs, 1H), 5.08-5.02 (m, 1H), 4.41 (d, *J* = 12.0 Hz, 1H), 4.09 (d, *J* = 12.0 Hz, 1H), 1.56 (s, 9H),

1.31-1.26 (m, 18H);  $^{13}\text{C}$  NMR (100 MHz,  $\text{CDCl}_3$ )  $\delta$  171.0, 152.1, 141.9, 137.3, 133.6, 130.9, 117.0, 83.9, 83.6, 81.6, 69.6, 48.8, 47.2, 28.3, 25.3, 24.9, 21.8;  $^{11}\text{B}$  NMR (128 MHz,  $\text{CDCl}_3$ )  $\delta$  30.7; HRMS (ESI) calcd for  $\text{C}_{23}\text{H}_{34}\text{BINO}_6$  ( $[\text{M}+\text{H}]^+$ ): 558.1524, found: 558.1520. The enantiopurity was determined by HPLC analysis (Daicel Chiralpak IF column, Hexane/*i*PrOH = 95:5, flow rate = 1.0 mL/min., wavelength = 254 nm,  $t_R$  = 5.78 (minor), 7.64 (major)).

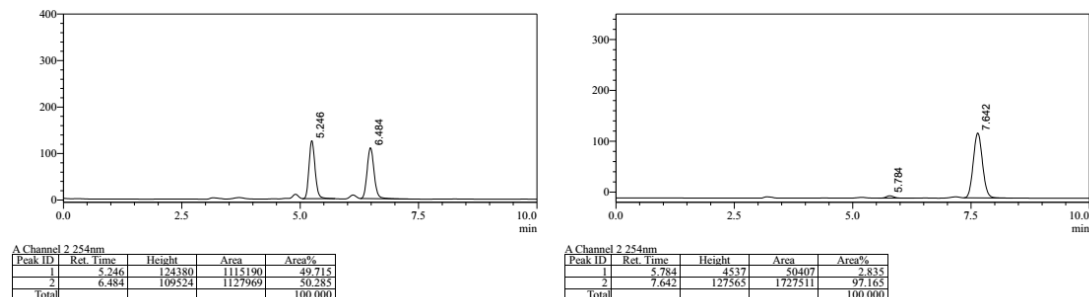

## Compound 2p

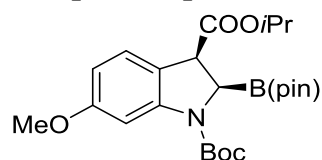

Colorless oil, 81.1 mg, 88% yield, 98:2 *d.r.*, 95% *ee*,  $[\alpha]_D^{25} = -73.8$  (*c* 0.13,  $\text{CHCl}_3$ ).  $^1\text{H}$  NMR (400 MHz,  $\text{CDCl}_3$ )  $\delta$  7.45-7.14 (m, 2H), 6.47-6.44 (m, 1H), 5.07-4.98 (m, 1H), 4.37 (d,  $J = 12.0$  Hz, 1H), 4.11 (d,  $J = 12.0$  Hz, 1H), 3.77 (s, 3H), 1.58 (s, 9H), 1.32-1.24 (m, 18H);  $^{13}\text{C}$  NMR (100 MHz,  $\text{CDCl}_3$ )  $\delta$  171.8, 160.4, 152.3, 143.3, 124.9, 120.3, 107.6, 101.1, 83.8, 81.2, 69.1, 55.3, 49.8, 47.1, 28.4, 25.3, 24.8, 21.8, 21.7;  $^{11}\text{B}$  NMR (128 MHz,  $\text{CDCl}_3$ )  $\delta$  31.8; HRMS (ESI) calcd for  $\text{C}_{24}\text{H}_{36}\text{BNNaO}_7$  ( $[\text{M}+\text{Na}]^+$ ): 484.2483, found: 484.2484. The enantiopurity was determined by HPLC analysis (Daicel Chiralpak IC column, Hexane/*i*PrOH = 90: 10, flow rate = 1.0 mL/min., wavelength = 254 nm,  $t_R$  = 5.14 (major), 6.21 (minor)).

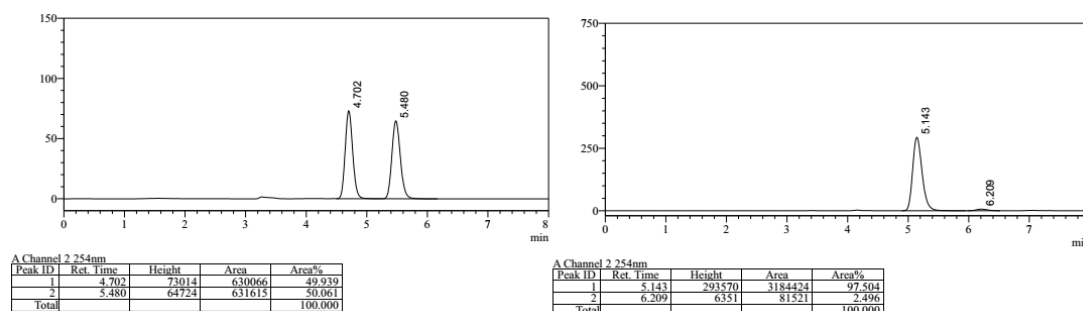

## Compound 2q

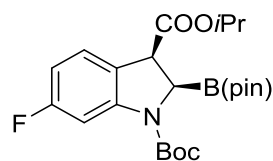

Colorless oil, 72.7 mg, 81% yield, 97:3 *d.r.*, 94% *ee*,  $[\alpha]_D^{25} = -73.6$  (*c* 0.38, CHCl<sub>3</sub>). <sup>1</sup>H NMR (400 MHz, CDCl<sub>3</sub>) δ 7.59-7.18 (m, 2H), 6.60-6.56 (m, 1H), 5.07-5.01 (m, 1H), 4.39 (d, *J* = 12.0 Hz, 1H), 4.13 (d, *J* = 12.0 Hz, 1H), 1.58 (s, 9H), 1.32-1.24 (m, 18H); <sup>13</sup>C NMR (100 MHz, CDCl<sub>3</sub>) δ 171.4, 163.4 (d, *J* = 241.0 Hz), 152.1, 143.6, 125.4, 123.7, 108.2 (d, *J* = 23.5 Hz), 103.1 (d, *J* = 22.6 Hz), 83.9, 81.8, 69.4, 49.6, 47.0, 28.3, 25.3, 24.8, 21.8, 21.7; <sup>11</sup>B NMR (128 MHz, CDCl<sub>3</sub>) δ 31.1; HRMS (ESI) calcd for C<sub>23</sub>H<sub>33</sub>BFNNaO<sub>6</sub> ([M+Na]<sup>+</sup>): 472.2283, found: 472.2285. The enantiopurity was determined by HPLC analysis (Daicel Chiralpak IE column, Hexane/*i*PrOH = 98:2, flow rate = 1.0 mL/min., wavelength = 254 nm, *t*<sub>R</sub> = 8.11 (minor), 11.16 (major).

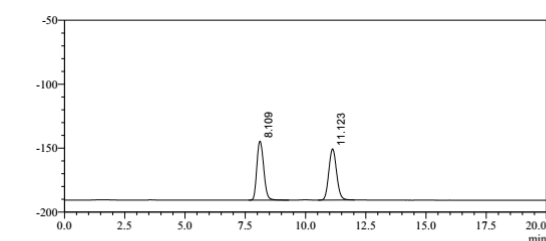

| Peak ID | Ret. Time | Height | Area   | Area%   |
|---------|-----------|--------|--------|---------|
| 1       | 8.109     | 46109  | 914435 | 50.412  |
| 2       | 11.123    | 39966  | 899488 | 49.588  |
| Total   |           |        |        | 100.000 |

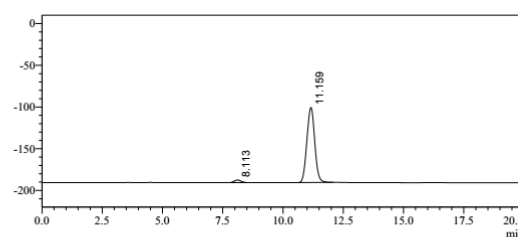

| Peak ID | Ret. Time | Height | Area    | Area%   |
|---------|-----------|--------|---------|---------|
| 1       | 8.113     | 3106   | 63341   | 3.003   |
| 2       | 11.159    | 89892  | 2045712 | 96.997  |
| Total   |           |        |         | 100.000 |

## Compound 2r

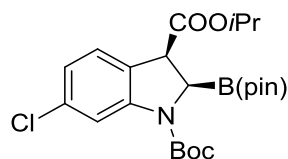

Colorless oil, 78.1 mg, 84% yield, 93:7 *d.r.*, 92% *ee*,  $[\alpha]_D^{25} = -67.6$  (*c* 0.21, CHCl<sub>3</sub>). <sup>1</sup>H NMR (400 MHz, CDCl<sub>3</sub>) δ 7.48 (brs, 1H), 7.19 (d, *J* = 7.6 Hz, 1H), 6.87 (d, *J* = 8.0 Hz, 1H), 5.07-5.02(m, 1H), 4.39 (d, *J* = 11.6 Hz, 1H), 4.12 (d, *J* = 12.0 Hz, 1H), 1.58 (s, 9H), 1.32-1.25 (m, 18H); <sup>13</sup>C NMR (100 MHz, CDCl<sub>3</sub>) δ 171.1, 151.9, 143.1, 134.3, 126.8, 125.4, 121.6, 115.4, 83.8, 81.6, 69.4, 49.2, 47.2, 28.2, 25.2, 24.9, 21.7; <sup>11</sup>B NMR (128 MHz, CDCl<sub>3</sub>) δ 31.5; HRMS (ESI) calcd for C<sub>23</sub>H<sub>33</sub>BCINNaO<sub>6</sub> ([M+Na]<sup>+</sup>): 488.1987, found: 488.1992. The enantiopurity was determined by HPLC analysis (Daicel Chiralpak IE column, Hexane/*i*PrOH = 98:2, flow rate = 1.0 mL/min., wavelength = 254 nm, *t*<sub>R</sub> = 8.45 (minor), 12.00 (major).

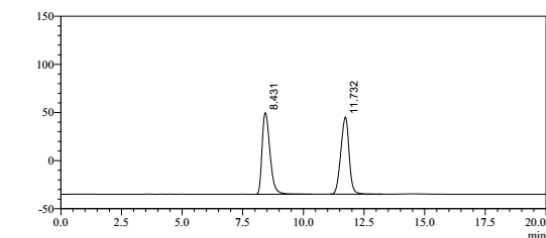

| Peak ID | Ret. Time | Height | Area    | Area%   |
|---------|-----------|--------|---------|---------|
| 1       | 8.431     | 84762  | 1917072 | 50.101  |
| 2       | 11.732    | 80202  | 1909363 | 49.899  |
| Total   |           |        |         | 100.000 |

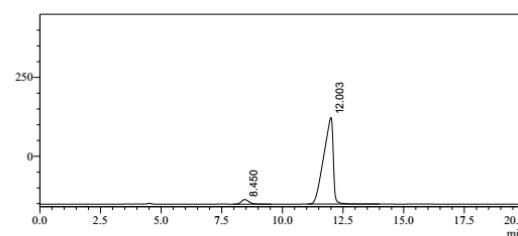

| Peak ID | Ret. Time | Height | Area    | Area%   |
|---------|-----------|--------|---------|---------|
| 1       | 8.450     | 14384  | 319448  | 4.063   |
| 2       | 12.003    | 274260 | 7543034 | 95.937  |
| Total   |           |        |         | 100.000 |



## Compound 2s

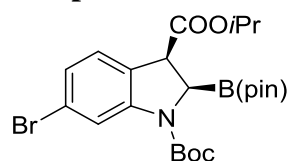

White solid, 74.3 mg, 73% yield, 94:6 *d.r.*, 93% *ee*,  $[\alpha]_D^{25} = -49.5$  (*c* 0.15, CHCl<sub>3</sub>). <sup>1</sup>H NMR (400 MHz, CDCl<sub>3</sub>) δ 7.64 (s, 1H), 7.14 (d, *J* = 7.6 Hz, 1H), 7.02 (d, *J* = 7.6 Hz, 1H), 5.07-5.01(m, 1H), 4.37 (d, *J* = 12.0 Hz, 1H), 4.11 (d, *J* = 12.0 Hz, 1H), 1.58 (s, 9H), 1.32-1.24 (m, 18H); <sup>13</sup>C NMR (100 MHz, CDCl<sub>3</sub>) δ 171.1, 152.0, 127.4, 125.9, 124.6, 122.4, 118.4, 83.9, 82.0, 69.5, 49.2, 47.3, 28.3, 25.3, 25.0, 21.8 (one aromatic carbon signal does not show.); <sup>11</sup>B NMR (128 MHz, CDCl<sub>3</sub>) δ 31.8; HRMS (ESI) calcd for C<sub>23</sub>H<sub>33</sub>B<sup>79</sup>BrNNaO<sub>6</sub> ([M+Na]<sup>+</sup>): 532.1482, found: 532.1478. The enantiopurity was determined by HPLC analysis (Daicel Chiralpak IE column, Hexane/*i*PrOH = 98:2, flow rate = 1.0 mL/min., wavelength = 254 nm, *t*<sub>R</sub> = 8.85 (minor), 12.44 (major).

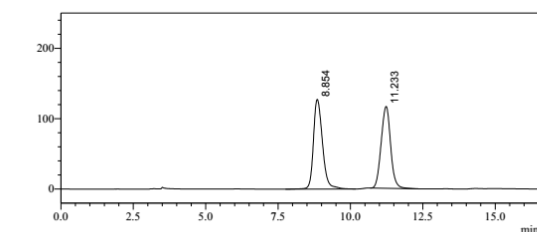

| Peak ID | Ret. Time | Height | Area    | Area%   |
|---------|-----------|--------|---------|---------|
| 1       | 8.854     | 127443 | 2771900 | 51.098  |
| 2       | 11.233    | 116293 | 2652743 | 48.902  |
| Total   |           |        |         | 100.000 |

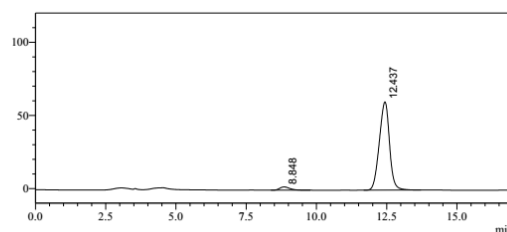

| Peak ID | Ret. Time | Height | Area    | Area%   |
|---------|-----------|--------|---------|---------|
| 1       | 8.848     | 2236   | 56832   | 3.597   |
| 2       | 12.437    | 60315  | 1523194 | 96.403  |
| Total   |           |        |         | 100.000 |

## Compound 3t

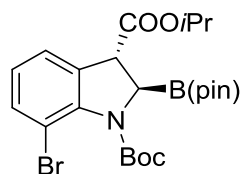

Colorless oil, 52.9 mg, 52% yield, 16:84 *d.r.*, 78% *ee*,  $[\alpha]_D^{25} = -50.0$  (*c* 0.16, CHCl<sub>3</sub>). <sup>1</sup>H NMR (400 MHz, CDCl<sub>3</sub>) δ 7.39 (d, *J* = 8.0 Hz, 1H), 7.23 (d, *J* = 7.2 Hz, 1H), 6.92-6.88 (m, 1H), 5.07-5.00 (m, 1H), 4.09-4.04 (m, 2H), 1.56 (s, 9H), 1.26-1.24 (m, 18H); <sup>13</sup>C NMR (100 MHz, CDCl<sub>3</sub>) δ 171.2, 155.4, 142.5, 136.5, 132.9, 125.7, 122.9, 112.5, 83.4, 82.9, 68.8, 54.3, 49.6, 28.3, 24.8, 24.7, 21.8; <sup>11</sup>B NMR (128 MHz, CDCl<sub>3</sub>) δ 27.6 ppm; HRMS (ESI) calcd for C<sub>23</sub>H<sub>33</sub>B<sup>81</sup>BrNNaO<sub>6</sub> ([M+Na]<sup>+</sup>): 534.1462, found: 534.1467. The enantiopurity was determined by HPLC analysis (Daicel Chiralpak IE column, Hexane/*i*PrOH = 98:2, flow rate = 1.0 mL/min., wavelength = 254 nm, *t*<sub>R</sub> = 11.16 (minor), 15.86 (major).

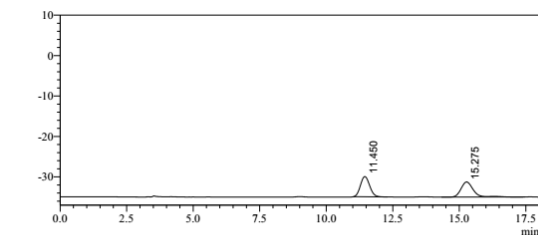

| Peak ID | Ret. Time | Height | Area   | Area%   |
|---------|-----------|--------|--------|---------|
| 1       | 11.450    | 5007   | 120558 | 50.270  |
| 2       | 15.275    | 3737   | 119262 | 49.730  |
| Total   |           |        |        | 100.000 |

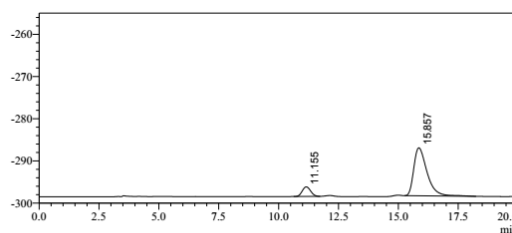

| Peak ID | Ret. Time | Height | Area   | Area%   |
|---------|-----------|--------|--------|---------|
| 1       | 11.155    | 2262   | 55462  | 11.209  |
| 2       | 15.857    | 11371  | 439339 | 88.791  |
| Total   |           |        |        | 100.000 |

## Compound 2v

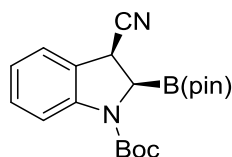

Colorless oil, 62.2 mg, 84% yield, 92:8 *d.r.*, 73% *ee*,  $[\alpha]_D^{25} = -35.0$  (*c* 0.37, CHCl<sub>3</sub>). <sup>1</sup>H NMR (400 MHz, CDCl<sub>3</sub>) δ 7.86-7.46 (m, 1H), 7.32 (d, *J* = 7.6 Hz, 1H), 7.28-7.25 (m, 1H), 7.02-6.98 (m, 1H), 4.50 (br s, 1H), 4.05 (br s, 1H), 1.59 (s, 9H), 1.35 (s, 12H); <sup>13</sup>C NMR (100 MHz, CDCl<sub>3</sub>) δ 152.7, 141.5, 129.8, 125.3, 122.7, 118.3, 115.0, 84.8, 82.6, 47.4, 30.8, 28.3, 25.4, 24.4; HRMS (ESI) calcd for C<sub>20</sub>H<sub>27</sub>BN<sub>2</sub>NaO<sub>4</sub>([M+Na]<sup>+</sup>): 393.1956, found: 393.1963. The enantiopurity was determined by HPLC analysis (Daicel Chiralpak IC column, Hexane/*i*PrOH = 90:10, flow rate = 1.0 mL/min., wavelength = 254 nm, *t*<sub>R</sub> = 5.51 (minor), 6.95 (major)).

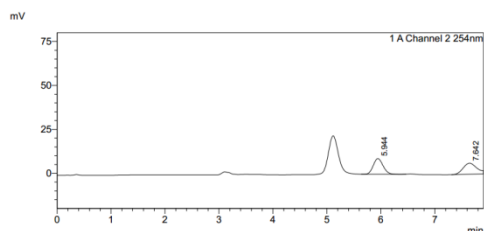

| Peak ID | Ret. Time | Height | Area   | Area%   |
|---------|-----------|--------|--------|---------|
| 1       | 5.944     | 8872   | 109485 | 49.926  |
| 2       | 7.642     | 6240   | 109609 | 50.074  |
| Total   |           |        |        | 100.000 |

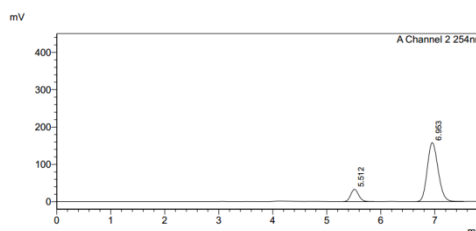

| Peak ID | Ret. Time | Height | Area    | Area%   |
|---------|-----------|--------|---------|---------|
| 1       | 5.512     | 32845  | 341806  | 13.408  |
| 2       | 6.953     | 157893 | 2207447 | 86.592  |
| Total   |           |        |         | 100.000 |

## 8. Method to determine diastereoselective ratio (*d.r.*) by NMR (reaction of 1c at room temperature as an example)

To determine the *d.r.* value (**2c**/**3c**), H<sup>a-c</sup> and H<sup>a'-c'</sup> were chosen as diagnostic signals. Apparently, H<sup>a</sup> and H<sup>a'</sup> overlap at δ 5.07 ppm. In order to assign H<sup>b</sup>, H<sup>c</sup>, H<sup>b'</sup>, and H<sup>c'</sup>, a deuterium experiment was conducted. The reaction was carried out with MeOD instead of normal alcohol. Therefore by combination of <sup>1</sup>H NMR spectra from normal reaction we could elucidate the assignments of these diagnostic protons as shown in Figures S1 and S2. The disappearance of signal at δ 4.48 ppm upon use of MeOD indicates that H<sup>c</sup> (or H<sup>c'</sup>) is C3-proton in **2c** (or **3c**) (Figures S1 and S2, right spectra). Another information could be obtained is that H<sup>b</sup> and H<sup>b'</sup> overlap at δ 4.10 ppm (Figure S1). Lastly, the integration difference (0.12) of signal at δ 4.10 ppm minus that of signal at δ 4.48 ppm is twice as much as difference (0.06) between signals at δ 5.07

ppm and  $\delta$  4.48 ppm, which indicates that  $H^b$  and  $H^c$  overlap at  $\delta$  4.10 ppm. Therefore the chemical of 4.48 ppm belongs to  $H^c$ . With that, d.r. value could be obtained from singals at  $\delta$  5.07 ppm ( $H^a$  and  $H^{a'}$ ) and  $\delta$  4.48 ppm ( $H^c$ ). A total integration of  $H^a$  and  $H^{a'}$  is denoted  $I^{a+a'}$ . The integration of  $H^c$  is denoted  $I^c$ . Therefore we could deduce the  $I^a$  by subtraction  $I^c$  from  $I^{a+a'}$ . Thus the d.r. could be calculated as  $100 \cdot I^c / I^{a+a'} : 100 \cdot I^a / I^{a+a'}$ . The d.r. values of the rest substrate scope could be calculated by analogue.

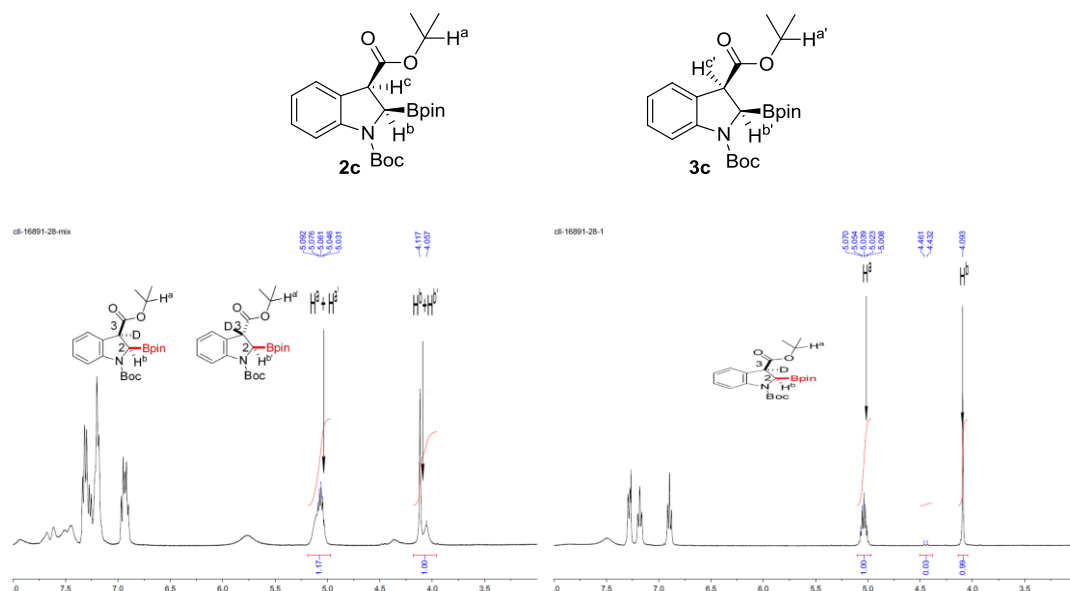

Figure S1. Partial  $^1\text{H}$  NMR spectra of deuterium experiment. Left:  $^1\text{H}$  NMR of crude reaction mixture; right: pure  $C3\text{-D}$  *cis* product.

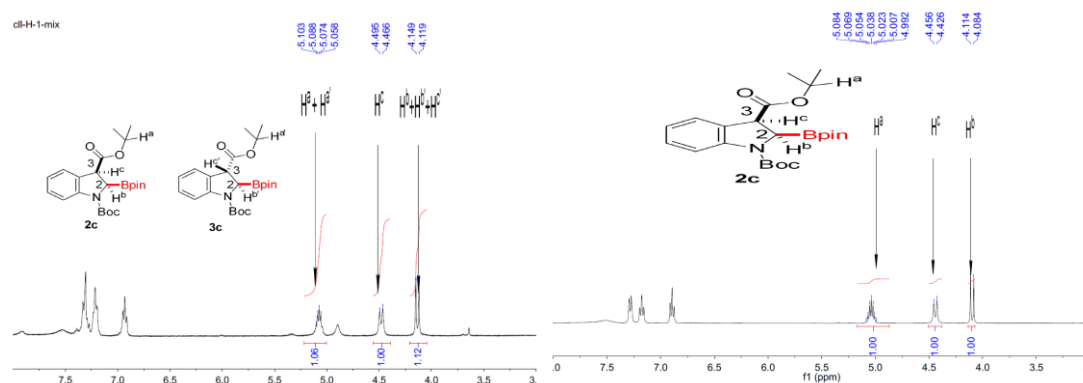

Figure S2. Partial  $^1\text{H}$  NMR spectra of crude mixture and **2c**. Left: crude  $^1\text{H}$  NMR of crude mixture; right: pure *cis* product **2c**.

## 9. Control experiments for isomerization test and NMR spectrum

In order to know possibility of isomerization of product, three control experiments were conducted: 1) **2c** under reaction conditions at  $40^\circ\text{C}$  for 18 h; 2) **2c** under reaction conditions without  $\text{B}_2\text{pin}_2$  at  $40^\circ\text{C}$  for 18 h; 3) **2c** in  $\text{CDCl}_3$  for 24 hours. The results of these experiments show that no isomerization was observed under these

conditions, demonstrating relative stability of stereochemistry of **2c**. Additionally, the ee value of each control experiment was not changed.

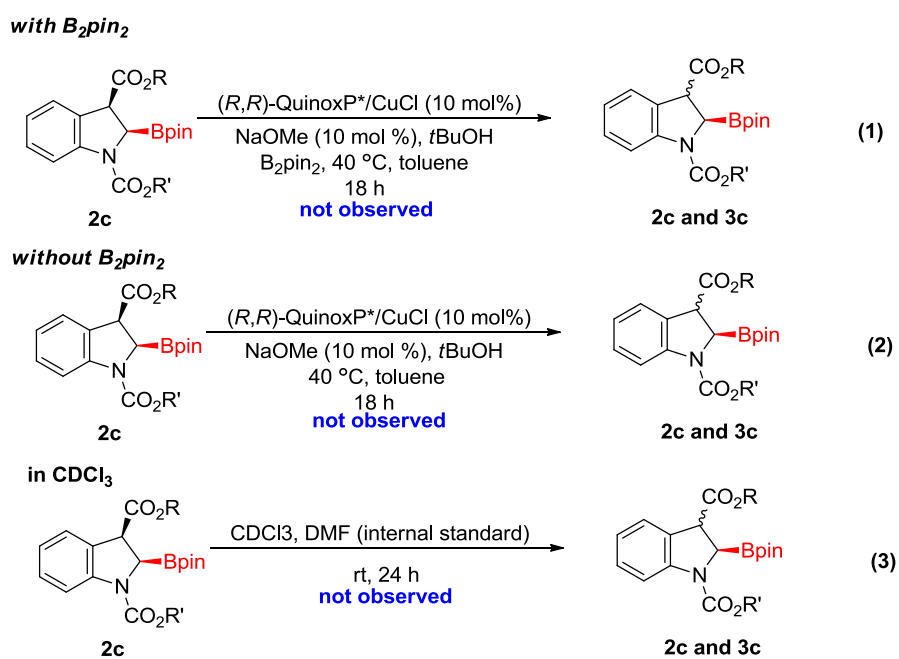

### NMR of control experiment (1)

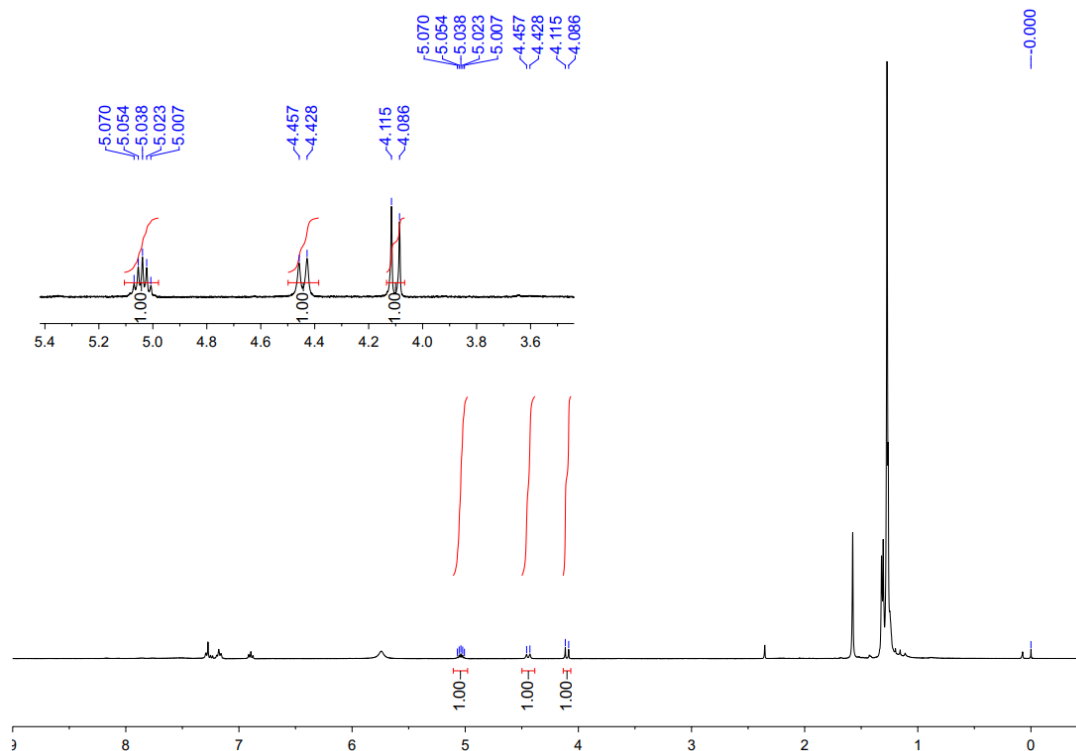

NMR of control experiment (2)

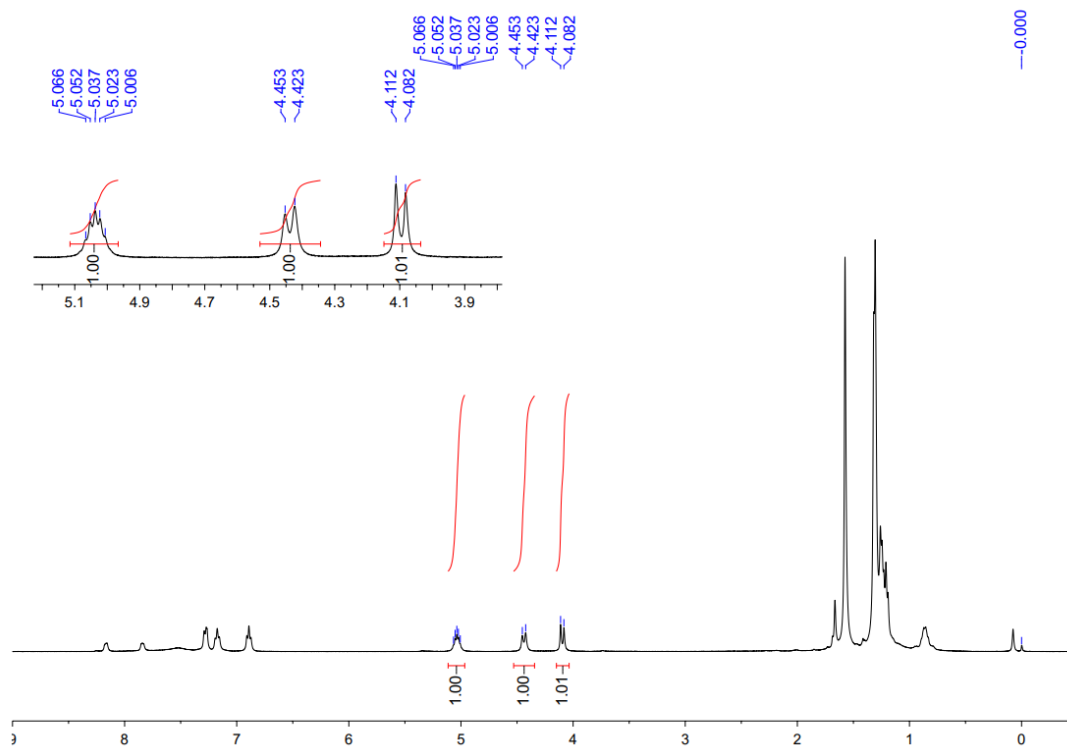

NMR of control experiment (3)

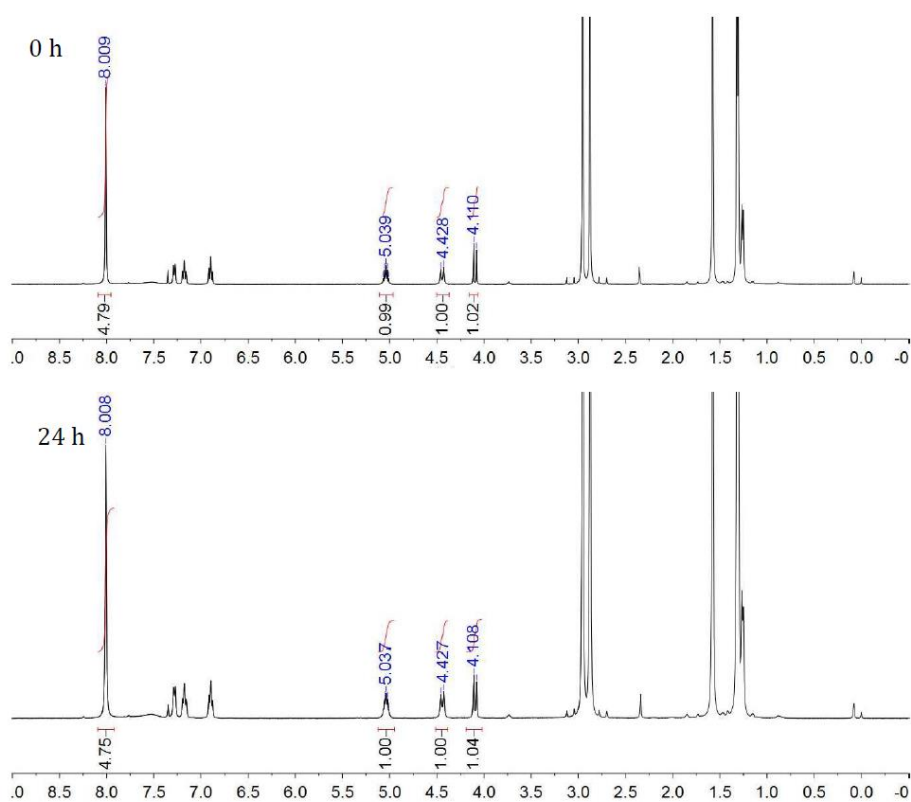

## 10. Gram-scale dearomative borylation of indole 2c

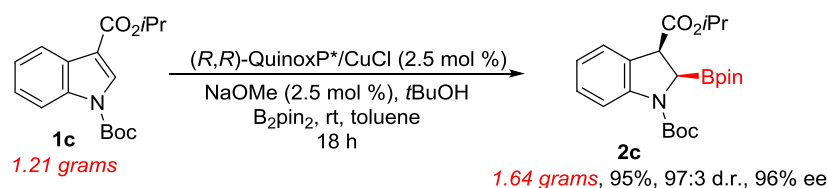

To a 100-mL flame-dried flask charged with CuCl (9.9 mg, 0.10 mmol), NaOMe (5.4 mg, 0.10 mmol) and (R,R)-QuinoxP\* (33.5 mg, 0.10 mmol) was added toluene (10 mL). The resulting mixture was allowed to stir at room temperature for 0.5 h. B<sub>2</sub>pin<sub>2</sub> (1.53 g, 6.0 mmol in 10 mL) was then introduced and the reaction was allowed to stir at same temperature for 10 min followed by addition of indole **1c** (1.21 g, 4.0 mmol in 20 mL toluene) and tBuOH (0.77 mL, 8.0 mmol) at same temperature. The resulting mixture was continued to stir at room temperature for 12 h. After removal of the solvent, the <sup>1</sup>H NMR of crude mixture was taken to determine the d.r. value (97:3). The residue was purified by column chromatography on silica gel using PE/EtOAc (12:1) as the eluent to afford corresponding 2-boryl indole **2c** as colorless oil (1.64 g, 95% yield, 97:3 d.r., 96% ee).

## 11. C3 functionalization of 2-borylindoline 4

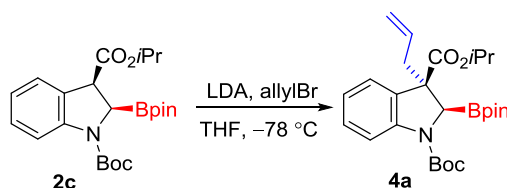

To a 50-mL flame-dried flask charged with 2-borylindoline **2c** (1.64 g, 3.80 mmol) and THF (30 mL) was added LDA (2.85 mL, 2M in hep/ethylbenzene, 5.7 mmol, 1.5 equiv) at -78 °C dropwisely. The resulting mixture was allowed at same temperature for 30 min. The allyl bromide (0.49 mL, 5.7 mmol, 1.5 equiv) was then added slowly at -78 °C. The reaction mixture was then allowed to warm to room temperature and continued to stir at same temperature for 3 h. After removal of the solvent, the residue was purified by column chromatography on silica gel using PE/EtOAc (20: 1) as the eluent to afford C3 allylated 2-borylindoline **4a** as colorless oil (1.75 g, 98%). The relative configuration was determined by 2D NMR NOSEY spectrum.

96:4 d.r., 95% ee,  $[\alpha]_D^{25} = -50.0$  (c 0.16, CHCl<sub>3</sub>). <sup>1</sup>H NMR (400 MHz, CDCl<sub>3</sub>) δ 7.84-7.47 (m, 1H), 7.35-7.33 (m, 1H), 7.18 (s, 1H), 6.91 (s, 1H), 5.60 (s, 1H), 5.13-5.05 (m, 3H), 3.87 (s, 1H), 2.60-2.66 (m, 2H), 1.57 (s, 9H), 1.27 (brs, 18H); <sup>13</sup>C NMR (100 MHz, CDCl<sub>3</sub>) δ 173.0, 152.3, 142.1, 132.6, 132.0, 128.6, 124.4, 121.7, 119.2, 114.9, 83.4, 81.1, 69.5, 54.1, 45.1, 28.4, 28.0, 25.3, 24.9, 21.7, 21.6; HRMS (ESI) calcd for C<sub>26</sub>H<sub>38</sub>BNNaO<sub>6</sub> ([M+Na]<sup>+</sup>): 494.2690, found: 494.2689. The enantiopurity was determined by HPLC analysis (Daicel Chiralpak IE column, Hexane/iPrOH = 98:2, flow rate = 1.0 mL/min., wavelength = 254 nm, t<sub>R</sub> = 6.73 (minor), 8.94 (major))

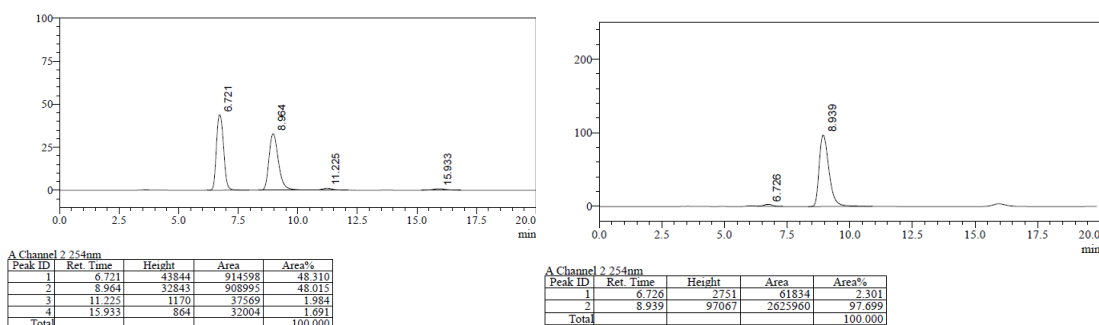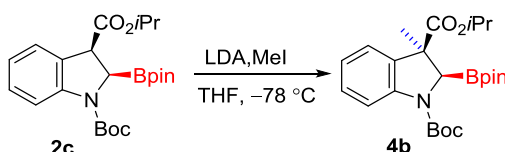

To a 25-mL flame-dried flask charged with 2-borylindoline **2c** (86.2 mg, 0.20 mmol) and THF (1 mL) was added LDA (150  $\mu\text{L}$ , 2M in hep/ethylbenzene, 0.3 mmol, 1.5 equiv) at  $-78\text{ }^\circ\text{C}$  dropwisely. The resulting mixture was allowed at same temperature for 10 min. The iodomethane (24.4  $\mu\text{L}$ , 0.4 mmol, 2.0 equiv) was then added slowly at  $-78\text{ }^\circ\text{C}$ . The reaction mixture was then allowed to warm to room temperature and continued to stir at same temperature for 10 min. After removal of the solvent, the residue was purified by column chromatography on silica gel using PE/EtOAc (15: 1) as the eluent to afford C3 methylated 2-borylindoline **8** as colorless oil (59.6 mg, 67%). d.r. = 2:1, 96% *ee*,  $[\alpha]_D^{25} = -18.0$  (*c* 0.3,  $\text{CHCl}_3$ ).  $^1\text{H NMR}$  (400 MHz,  $\text{CDCl}_3$ )  $\delta$  7.46 (s, 1H), 7.28-7.27 (m, 1H), 7.20-7.16 (m, 1H), 6.93-6.90 (m, 1H), 5.00-4.97 (m, 1H), 4.38 (s, 0.3H), 3.68 (s, 0.6H), 1.58 (s, 9H), 1.29-1.20 (m, 18H);  $^{13}\text{C NMR}$  (100 MHz,  $\text{CDCl}_3$ )  $\delta$  174.0, 173.5, 152.6, 129.0, 128.5, 124.6, 123.7, 122.7, 121.9, 121.8, 115.3, 114.9, 83.5, 81.1, 69.3, 68.8, 57.7, 28.4, 28.0, 27.2, 25.3, 24.9, 21.7, 21.5; HRMS (ESI) calcd for  $\text{C}_{24}\text{H}_{36}\text{BNNaO}_6$  ( $[\text{M}+\text{Na}]^+$ ): 468.2528, found: 468.2542. The enantiopurity was determined by HPLC analysis (Daicel Chiralpak IE column, Hexane/*i*PrOH = 99:1, flow rate = 1.0 mL/min., wavelength = 254 nm,  $t_R$  = 9.29 (minor), 11.54 (major))

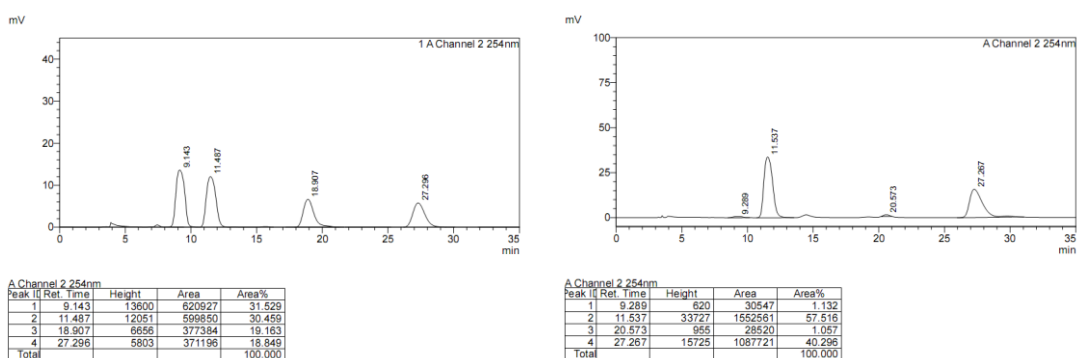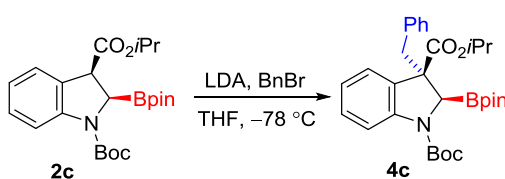

To a 25-mL flame-dried flask charged with 2-borylindoline **2c** (86.2 mg, 0.20 mmol) and THF (1 mL) was added LDA (150  $\mu$ L, 2M in hep/ethylbenzene, 0.3 mmol, 1.5 equiv) at  $-78$   $^{\circ}$ C dropwisely. The resulting mixture was allowed at same temperature for 10 min. The benzyl bromide (35.6  $\mu$ L, 0.3 mmol, 1.5 equiv) was then added slowly at  $-78$   $^{\circ}$ C. The reaction mixture was then allowed to warm to room temperature and continued to stir at same temperature for 10 min. After removal of the solvent, the residue was purified by column chromatography on silica gel using PE/EtOAc (15: 1) as the eluent to afford C3 benzylated 2-borylindoline **4c** as colorless oil (67.8 mg, 65%). 95% *ee*,  $[\alpha]_D^{25} = -23.0$  (*c* 0.57,  $\text{CHCl}_3$ ).  $^1\text{H}$  NMR (400 MHz,  $\text{CDCl}_3$ )  $\delta$  7.68-7.34 (m, 2H), 7.19-7.09 (m, 4H), 6.94-6.74 (m, 3H), 5.09 (s, 1H), 3.97 (s, 1H), 3.27 (d, *J* = 6.8 Hz, 1H), 3.10-3.02 (m, 1H), 1.46 (s, 9H), 1.31-1.23 (m, 18H);  $^{13}\text{C}$  NMR (100 MHz,  $\text{CDCl}_3$ )  $\delta$  173.4, 151.7, 142.9, 135.7, 131.8, 129.9, 128.7, 127.7, 126.6, 124.9, 121.4, 115.1, 83.3, 80.9, 69.7, 58.9, 53.6, 46.3, 28.3, 25.2, 24.7, 21.7; HRMS (ESI) calcd for  $\text{C}_{30}\text{H}_{41}\text{BNO}_6$  ( $[\text{M}+\text{H}]^+$ ): 522.3021, found: 522.3030. The enantiopurity was determined by HPLC analysis (Daicel Chiralpak IE column, Hexane/*i*PrOH = 99:1, flow rate = 1.0 mL/min., wavelength = 254 nm,  $t_R$  = 4.67 (minor), 5.08 (major))

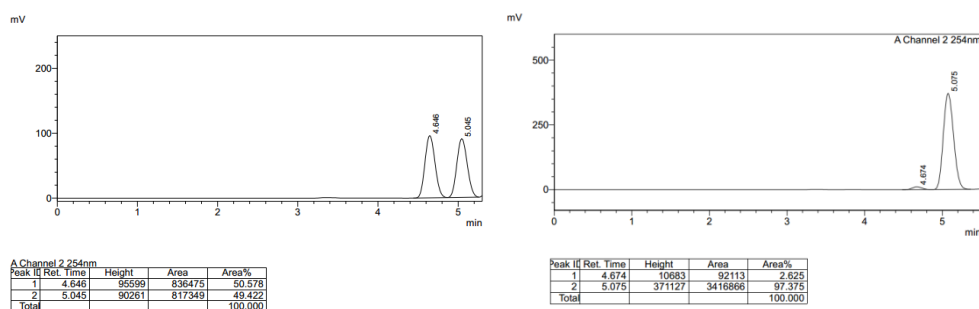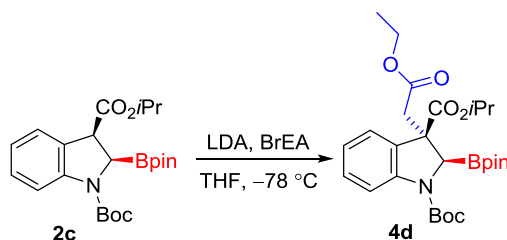

To a 25-mL flame-dried flask charged with 2-borylindoline **2c** (86.2 mg, 0.20 mmol) and THF (1 mL) was added LDA (150  $\mu$ L, 2M in hep/ethylbenzene, 0.3 mmol, 1.5 equiv) at  $-78$   $^{\circ}$ C dropwisely. The resulting mixture was allowed at same temperature for 10 min. The Ethyl bromoacetate (35.6  $\mu$ L, 0.3 mmol, 1.5 equiv) was then added slowly at  $-78$   $^{\circ}$ C. The reaction mixture was then allowed to warm to room temperature and continued to stir at same temperature for 10 min. After removal of the solvent, the residue was purified by column chromatography on silica gel using PE/EtOAc (12: 1) as the eluent to afford C3-alkylate 2-borylindoline **4d** as colorless oil (64.2mg, 62%). 96% *ee*,  $[\alpha]_D^{25} = -32.0$  (*c* 0.32,  $\text{CHCl}_3$ ).  $^1\text{H}$  NMR (400 MHz,  $\text{CDCl}_3$ )  $\delta$  7.89-7.48 (m, 1H), 7.27-7.18 (m, 2H), 6.91-6.89 (m, 1H), 5.08-5.05 (m, 1H), 4.13 (q, *J* = 6.6 Hz, 2H), 3.97 (s, 1H), 3.06(bris, 1H), 2.83 (d, *J* = 12.8 Hz, 1H), 1.58 (s, 9H), 1.27-1.22 (m, 21H);  $^{13}\text{C}$  NMR (100 MHz,  $\text{CDCl}_3$ )  $\delta$  171.9, 169.9, 152.2, 141.3, 131.8, 129.1, 123.9, 121.8, 115.0, 83.4, 81.4, 69.7, 60.9, 56.2, 54.7, 45.2, 28.4, 25.4,



24.8, 21.7, 21.5, 14.0; HRMS (ESI) calcd for  $C_{27}H_{41}BNO_8$  ( $[M+H]^+$ ): 518.2920, found: 518.2927. The enantiopurity was determined by HPLC analysis (Daicel Chiralpak ODH column, Hexane/*i*PrOH = 90:10, flow rate = 1.0 mL/min., wavelength = 254 nm,  $t_R$  = 6.65 (minor), 13.54 (major).

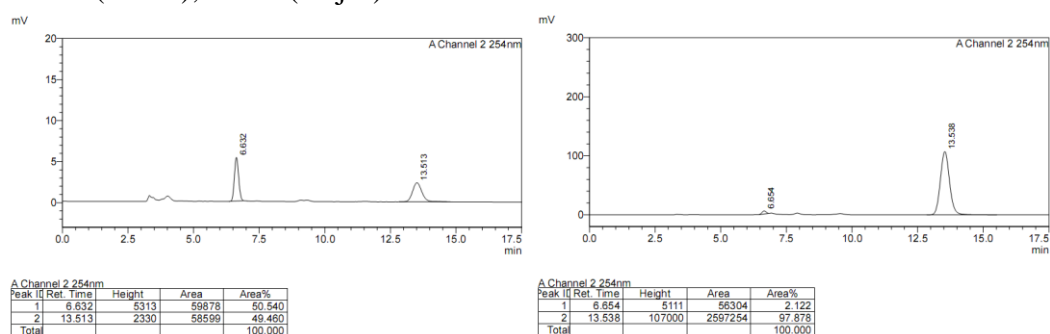

## 12. NOESY spectrum of allylated 2-borylindoline 4

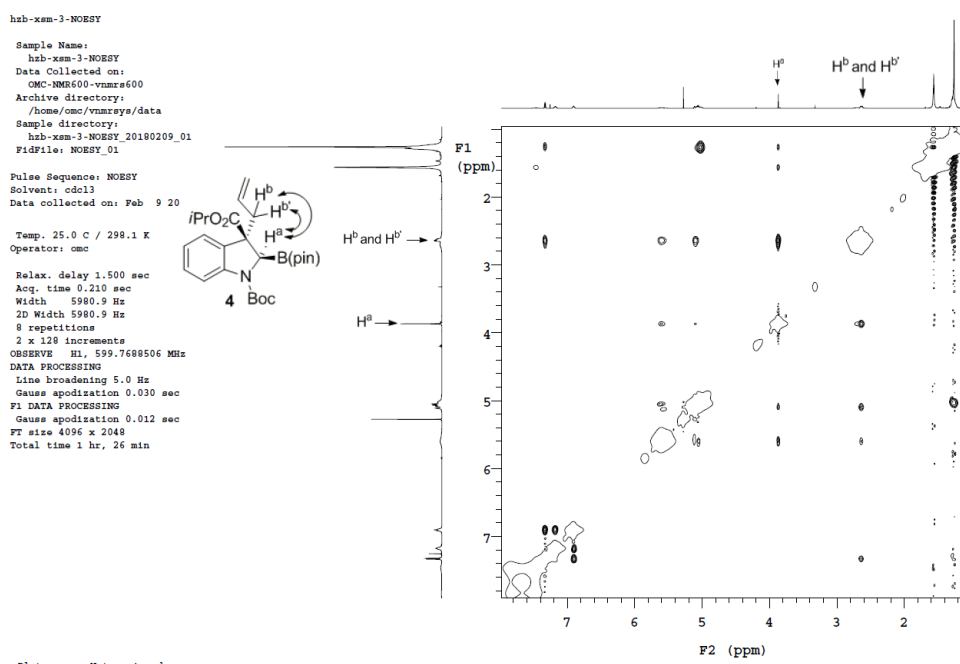

## 13. Oxidation of 2-borylindoline 4

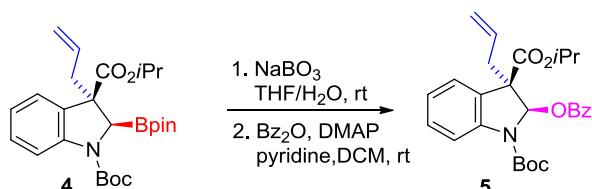

The oxidation of 2-borylindoline was adapted from literature procedures.<sup>7</sup> To a 25-mL flask charged with 4 (95 mg, 0.20 mmol), THF (2 mL) and H<sub>2</sub>O (2 mL) was added NaBO<sub>3</sub> 4H<sub>2</sub>O (123.2 mg, 0.80 mmol, 4.0 equiv) at room temperature. The

7. F. Meng, K. P. McGrath and A. H. Hoveyda *Nature* 2014, **513**, 367.

resulting mixture was allowed to stir at same temperature for 2 h. The reaction was then quenched with saturated Na<sub>2</sub>S<sub>2</sub>O<sub>3</sub> (5 mL) and diluted with water (20 mL). The biphasic solution was extracted with DCM 3 times (3 X 10 mL). The combined organic phase was then concentrated. The residue was dissolved in anhydrous DCM (5 mL) and cooled to 0 °C. Bz<sub>2</sub>O (68.0 mg, 0.30 mmol) and DMAP (2.7 mg, 0.02 mmol) were then introduced followed by slow addition of pyridine (24 μL, 0.30 mmol). The resulting mixture was then continued to stir at room temperature for 2 hours. After removal of the solvent, the residue was purified by column chromatography on silica gel using PE/EtOAc (10:1) as the eluent to afford corresponding indoline **5** as colorless oil (55.8 mg, 60% yield).

95% *ee*,  $[\alpha]_D^{25} = +82.7$  (*c* 0.38, CHCl<sub>3</sub>). <sup>1</sup>H NMR (400 MHz, CDCl<sub>3</sub>) δ 7.65-7.93 (m, 2H), 7.53-7.49 (m, 2H), 7.37-7.26 (m, 3H), 7.16-7.10 (m, 2H), 5.62-5.55 (m, 1H), 5.12-5.05 (m, 2H), 4.88-4.85 (m, 1H), 2.97-2.92 (m, 1H), 2.55-2.50 (m, 1H), 1.45 (s, 9H), 1.17 (d, *J* = 6.0 Hz, 3H), 0.92 (d, *J* = 5.6 Hz, 3H); <sup>13</sup>C NMR (100 MHz, CDCl<sub>3</sub>) δ 168.8, 164.2, 151.1, 141.2, 134.5, 133.3, 131.2, 130.6, 129.8, 129.6, 128.9, 128.7, 128.4, 126.8, 122.8, 119.9, 114.7, 87.0, 82.5, 69.2, 59.7, 42.4, 28.2, 21.7, 21.3; HRMS (ESI) calcd for C<sub>20</sub>H<sub>26</sub>NO<sub>4</sub> ([M-OBz]<sup>+</sup>): 344.1862, found: 344.1849. The enantiopurity was determined by HPLC analysis (Daicel Chiralpak IE column, Hexane/*i*PrOH = 99:1, flow rate = 1.0 mL/min., wavelength = 254 nm, *t*<sub>R</sub> = 10.90(minor), 12.72 (major))

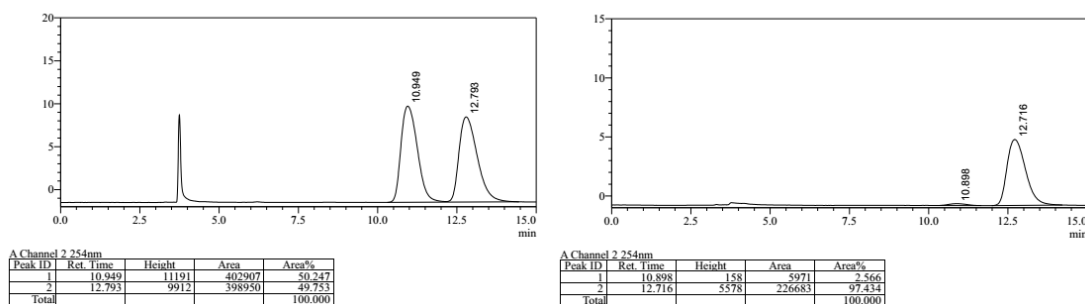

#### 14. Stereospecific vinylation of 2-borylindoline **4**.

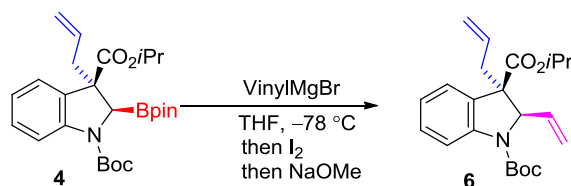

This reaction was adapted from the literature procedures.<sup>8</sup> To a 25-mL flame-dried Schlenk tube charged with **4** (110 mg, 0.23 mmol) and THF (2 mL) was added vinylMgBr (0.35 mL, 1 M in THF, 0.35 mmol, 1.5 equiv) at room temperature. The resulting mixture was allowed to stir at same temperature for 0.5 h. Methanolic

8. R. P. Sonawane, V. Jheengut, C. Rabalakos, R. Larouche-Gauthier, H. K. Scott and V. K. Aggarwal, *Angew. Chem., Int. Ed.* **2011**, 50, 3760.

solution of I<sub>2</sub> (292 mg, 1.15 mmol, 3 mL MeOH) was then introduced slowly to the reaction mixture at -78 °C. The reaction was then allowed to stir at this temperature for additional 0.5 h. Methanolic solution of NaOMe (62.1 mg, 1.15 mmol, 3 mL MeOH) was then added slowly at -78 °C. The resulting mixture was then warmed to room temperature and continued to stir at this temperature for 1 h. Saturated aqueous Na<sub>2</sub>S<sub>2</sub>O<sub>3</sub> (5 mL) was then added to quench the reaction. After dilution with H<sub>2</sub>O (20 mL), the mixture was extracted with EtOAc 3 times (3 X 20 mL). The combined organic phase was dried over anhydrous Na<sub>2</sub>SO<sub>4</sub>. After removal of the solvent, the residue was purified by column chromatography on silica gel using PE/EtOAc (20:1) as the eluent to afford corresponding 2-vinylindoline 6 as colorless oil (83.5 mg, 98% yield). 95% *ee*,  $[\alpha]_D^{25} = +99.4$  (*c* 0.4, CHCl<sub>3</sub>). <sup>1</sup>H NMR (400 MHz, CDCl<sub>3</sub>) 7.84 (brs, 1H), 7.30-7.24 (m, 2H), 7.01-6.98 (m, 1H), 5.73-5.64 (m, 1H), 5.57-5.48 (m, 1H), 5.25-5.21 (m, 1H), 5.14-5.11 (m, 1H), 5.05-5.03 (m, 2H), 4.59 (brs, 1H), 2.82-2.79 (m, 1H), 2.53-2.48 (m, 1H), 1.53 (s, 9H), 1.26-1.22 (m, 6H); <sup>13</sup>C NMR (100 MHz, CDCl<sub>3</sub>) δ 170.4, 151.8, 141.0, 133.0, 132.2, 128.4, 126.8, 122.2, 119.3, 118.2, 115.0, 82.3, 70.5, 68.6, 59.1, 43.9, 28.3, 21.8, 21.7 (one *sp*<sup>2</sup> carbon signal does not show.) HRMS (ESI) calcd for C<sub>22</sub>H<sub>33</sub>N<sub>2</sub>O<sub>4</sub> ([M+NH<sub>4</sub>]<sup>+</sup>): 389.2435, found: 389.2429. The enantiopurity was determined by HPLC analysis (Daicel Chiralpak IE column, Hexane/*i*PrOH = 99:1, flow rate = 1.0 mL/min., wavelength = 254 nm, *t*<sub>R</sub> = 9.23 (major), 10.03 (minor))

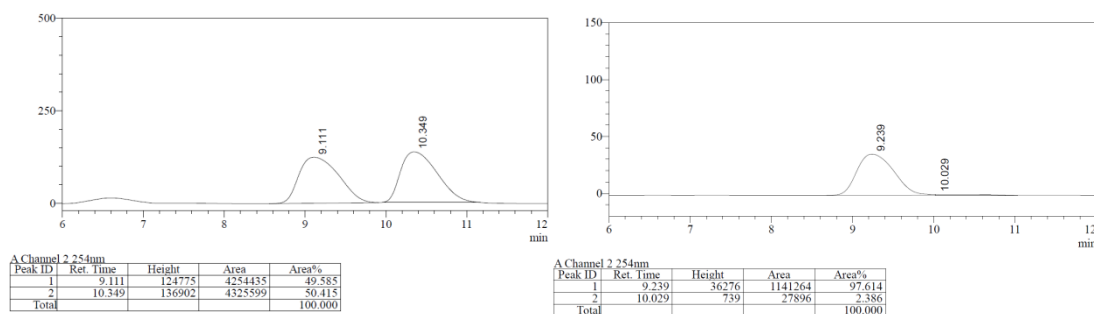

### 15. Stereospecific arylation of 2-borylindoline 4.

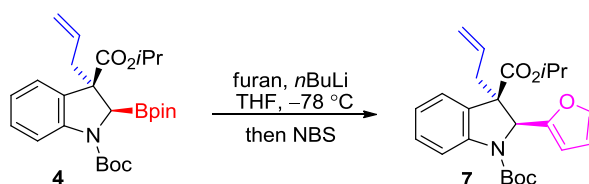

This reaction was adapted by the literature procedures.<sup>9</sup> To a 25-mL Schlenk tube charged with 4 (94 mg, 0.20 mmol) and THF (2 mL) was added freshly prepared fur-2-yl lithium (0.20 mL, 1.0 M in THF/hexanes, 0.20 mmol) slowly at -78 °C. The resulting mixture was then allowed to stir at this temperature for 1.5 h. NBS (36 mg, 0.20 mmol) in THF (2 mL) was then added slowly to the reaction mixture at -78 °C. The reaction was continued to stir at -78 °C for 0.5 h. Saturated aqueous Na<sub>2</sub>S<sub>2</sub>O<sub>3</sub> (2.5

9. A. Bonet, M. Odachowski, D. Leonori, S. Essafi and V. K. Aggarwal, *Nat. Chem.* 2014, **6**, 584.

mL) was then introduced to quench the reaction at room temperature. The organic phase was separated and the rest was extracted with EtOAc 3 times (3 X 10 mL). The combined organic phase was then dried over Na<sub>2</sub>SO<sub>4</sub>. After removal of the solvent, the residue was purified by column chromatography on silica gel using PE/EtOAc (20:1) as the eluent to afford corresponding 2-(2-furyl)-indoline **7** as colorless oil (32.9 mg, 40% yield).

Colorless oil, 32.9 mg, 40% yield, 95% *ee*,  $[\alpha]_D^{25} = +72.8$  (*c* 0.2, CHCl<sub>3</sub>). <sup>1</sup>H NMR (400 MHz, CDCl<sub>3</sub>) δ 7.90 (brs, 1H), 7.41-7.45 (m, 1H), 7.23-7.21 (m, 1H), 7.06-7.03 (m, 1H), 6.21 (s, 1H), 6.03 (brs, 1H), 5.62-5.52(m, 1H), 5.25 (s, 1H), 5.09-5.02(m, 2H), 4.83-4.78 (m, 1H), 2.86-2.81 (m, 1H), 2.64-2.58 (m, 1H), 1.41 (s, 9H), 1.09 (d, *J* = 6.0 Hz, 3H), 0.95 (d, *J* = 6.0 Hz, 3H); <sup>13</sup>C NMR (100 MHz, CDCl<sub>3</sub>) δ 170.1, 152.8, 151.6, 141.1, 132.0, 128.5, 126.8, 122.3, 119.5, 114.7, 110.3, 106.9, 81.1, 68.5, 65.1, 45.1, 29.3, 28.2, 21.6, 21.3; HRMS (ESI) calcd for C<sub>24</sub>H<sub>33</sub>N<sub>2</sub>O<sub>5</sub> ([M+NH<sub>4</sub>]<sup>+</sup>): 429.2384, found: 429.2380. The enantiopurity was determined by HPLC analysis (Daicel Chiralpak IE column, Hexane/*i*PrOH = 99:1, flow rate = 1.0 mL/min., wavelength = 254 nm, *t*<sub>R</sub> = 11.34 (major), 14.09 (minor).

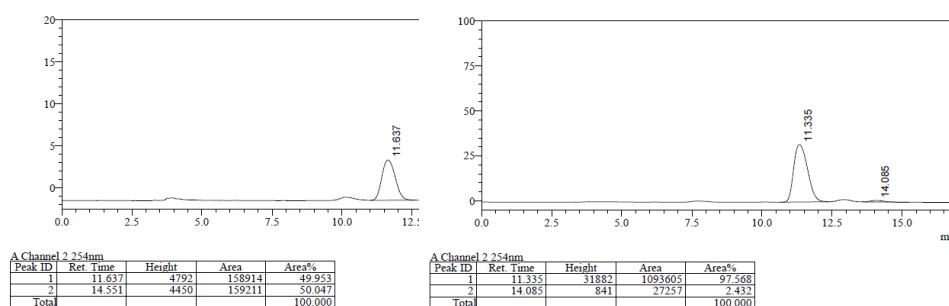

## 16. Crystallographic data of compound **2s**

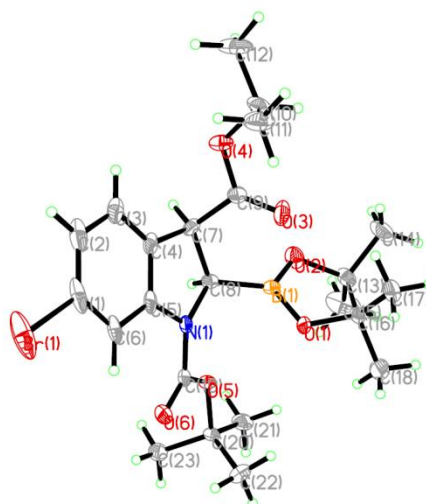

Table S2. Crystal data and structure refinement for **2s**.

|                     |                                                       |
|---------------------|-------------------------------------------------------|
| Identification code | 1                                                     |
| Empirical formula   | C <sub>23</sub> H <sub>33</sub> B Br N O <sub>6</sub> |

|                                   |                                             |                     |
|-----------------------------------|---------------------------------------------|---------------------|
| Formula weight                    | 510.22                                      |                     |
| Temperature                       | 153(2) K                                    |                     |
| Wavelength                        | 0.71073 Å                                   |                     |
| Crystal system                    | Orthorhombic                                |                     |
| Space group                       | P2(1)2(1)2(1)                               |                     |
| Unit cell dimensions              | a = 10.0308(12) Å                           | $\alpha = 90^\circ$ |
|                                   | b = 12.6903(16) Å                           | $\beta = 90^\circ$  |
|                                   | c = 19.943(2) Å                             | $\gamma = 90^\circ$ |
| Volume                            | 2538.6(5) Å <sup>3</sup>                    |                     |
| Z                                 | 4                                           |                     |
| Density (calculated)              | 1.335 Mg/m <sup>3</sup>                     |                     |
| Absorption coefficient            | 1.655 mm <sup>-1</sup>                      |                     |
| F(000)                            | 1064                                        |                     |
| Crystal size                      | 0.30 x 0.20 x 0.20 mm <sup>3</sup>          |                     |
| Theta range for data collection   | 1.90 to 25.00 °                             |                     |
| Index ranges                      | -11<=h<=11, -15<=k<=11, -23<=l<=22          |                     |
| Reflections collected             | 12877                                       |                     |
| Independent reflections           | 4452 [R(int) = 0.0382]                      |                     |
| Completeness to theta = 25.00°    | 100.0 %                                     |                     |
| Absorption correction             | Semi-empirical from equivalents             |                     |
| Max. and min. transmission        | 0.7331 and 0.6365                           |                     |
| Refinement method                 | Full-matrix least-squares on F <sup>2</sup> |                     |
| Data / restraints / parameters    | 4452 / 0 / 298                              |                     |
| Goodness-of-fit on F <sup>2</sup> | 1.001                                       |                     |
| Final R indices [I>2sigma(I)]     | R1 = 0.0408, wR2 = 0.1040                   |                     |
| R indices (all data)              | R1 = 0.0506, wR2 = 0.1091                   |                     |
| Absolute structure parameter      | 0.029(10)                                   |                     |
| Largest diff. peak and hole       | 0.584 and -0.841 e.Å <sup>-3</sup>          |                     |

## 17. NMR spectra of all new compounds

### Compound 1a

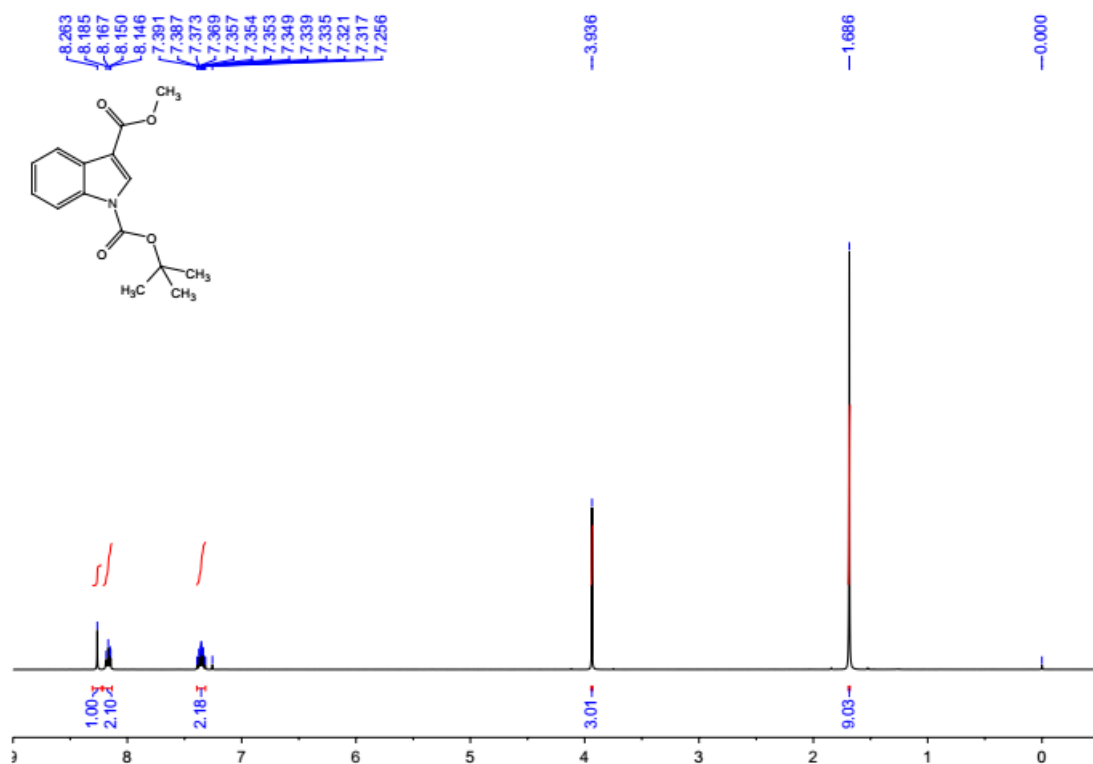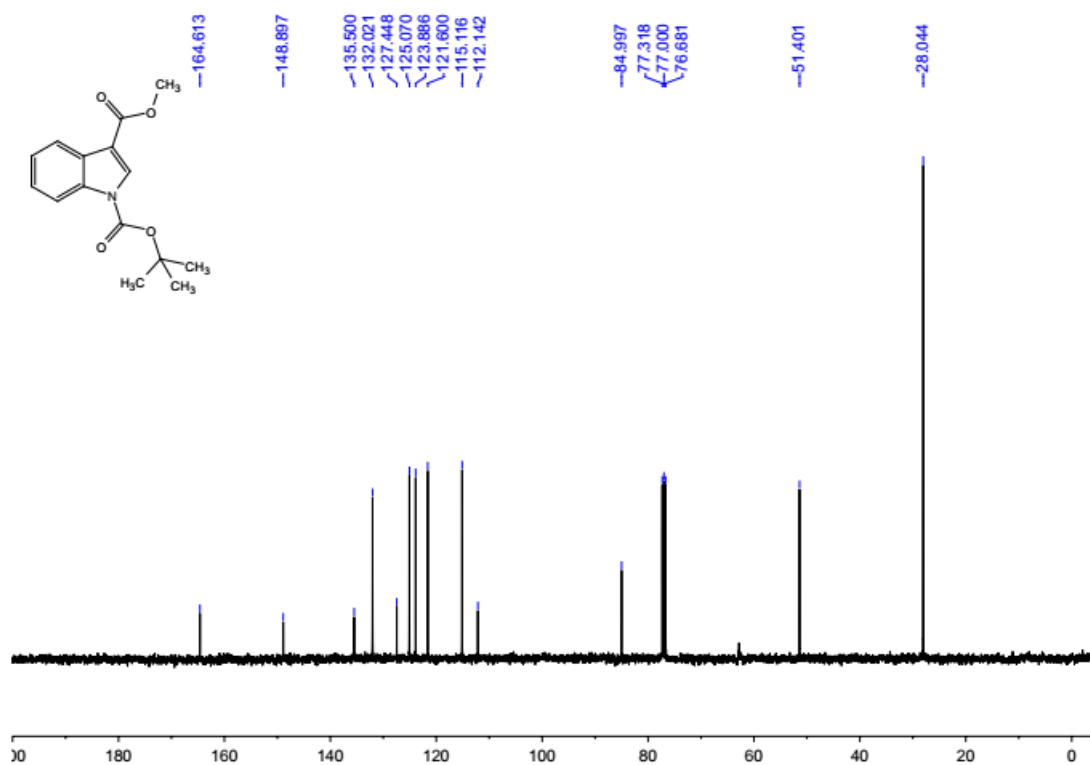

# Compound 1b

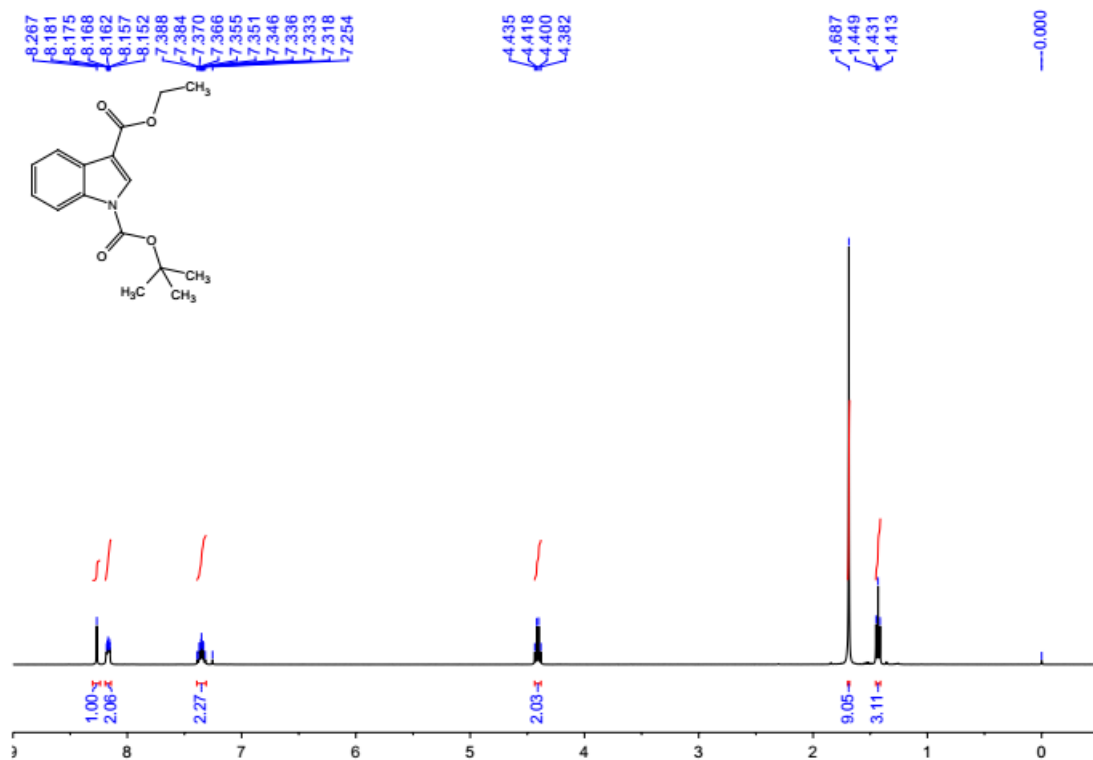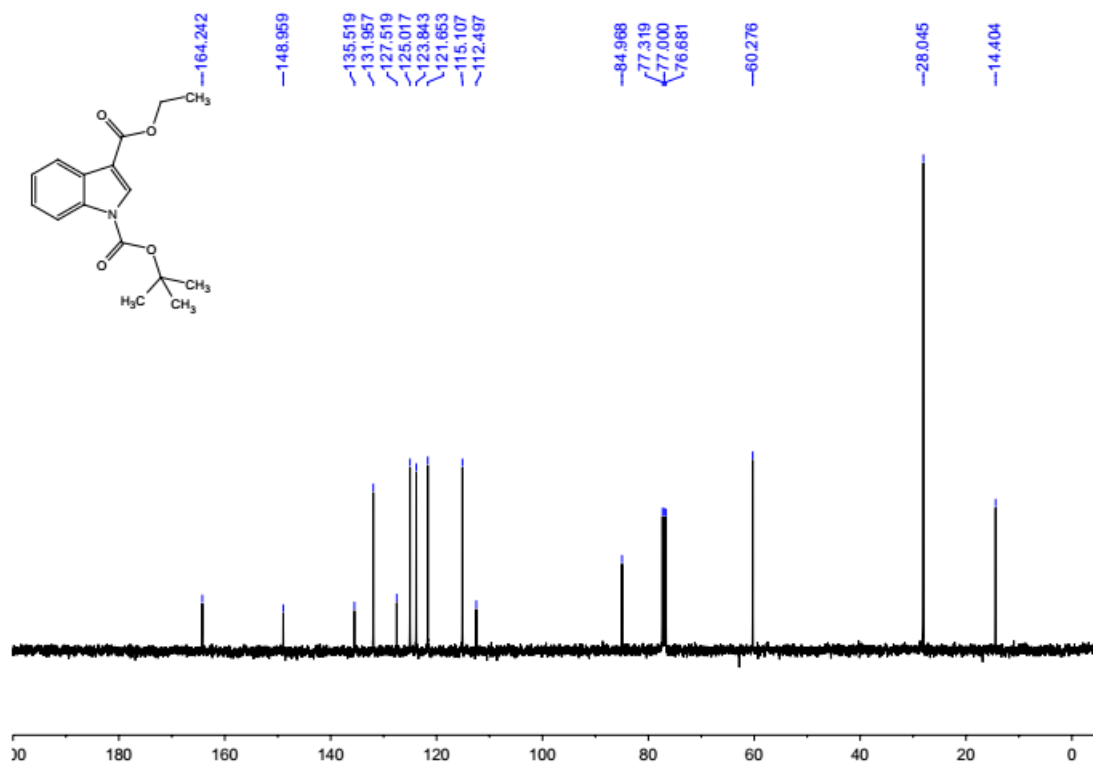

# Compound 1c

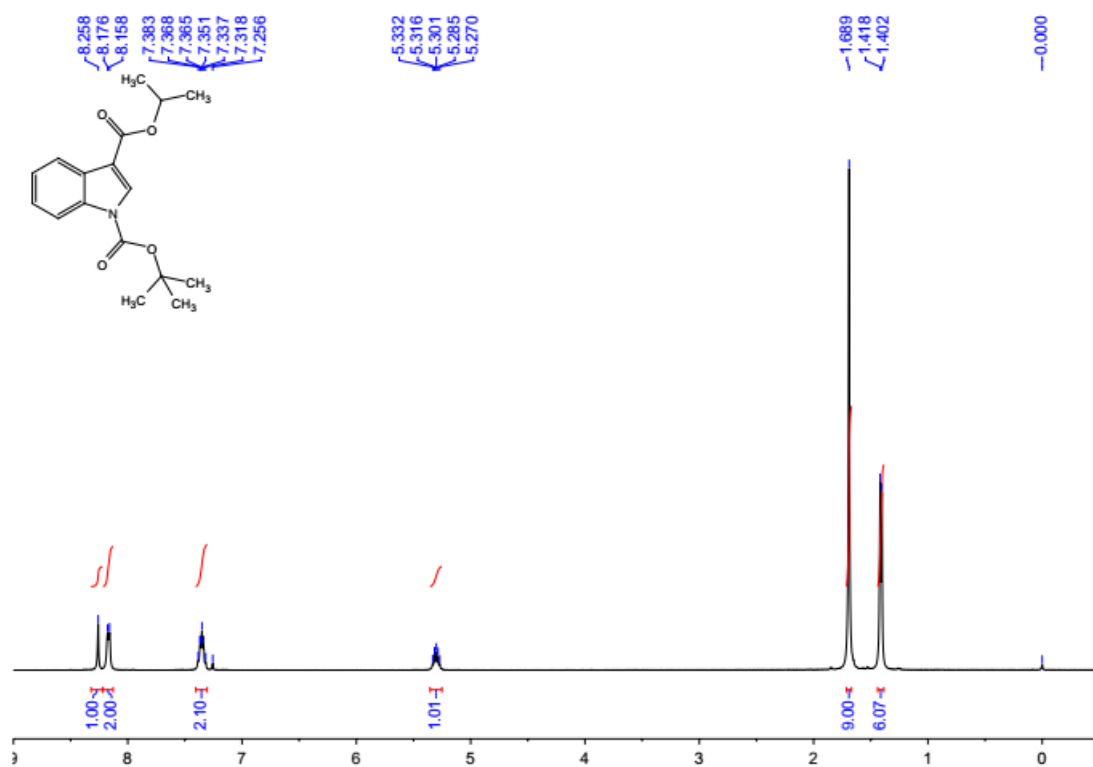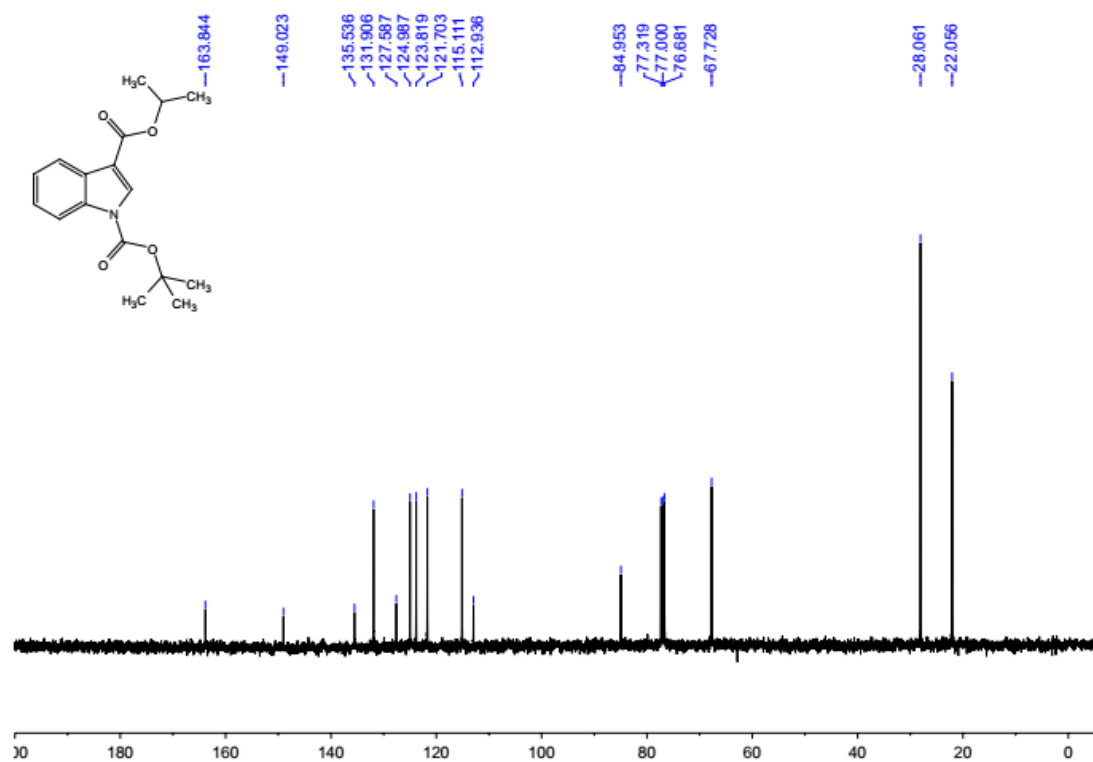



# Compound 1d

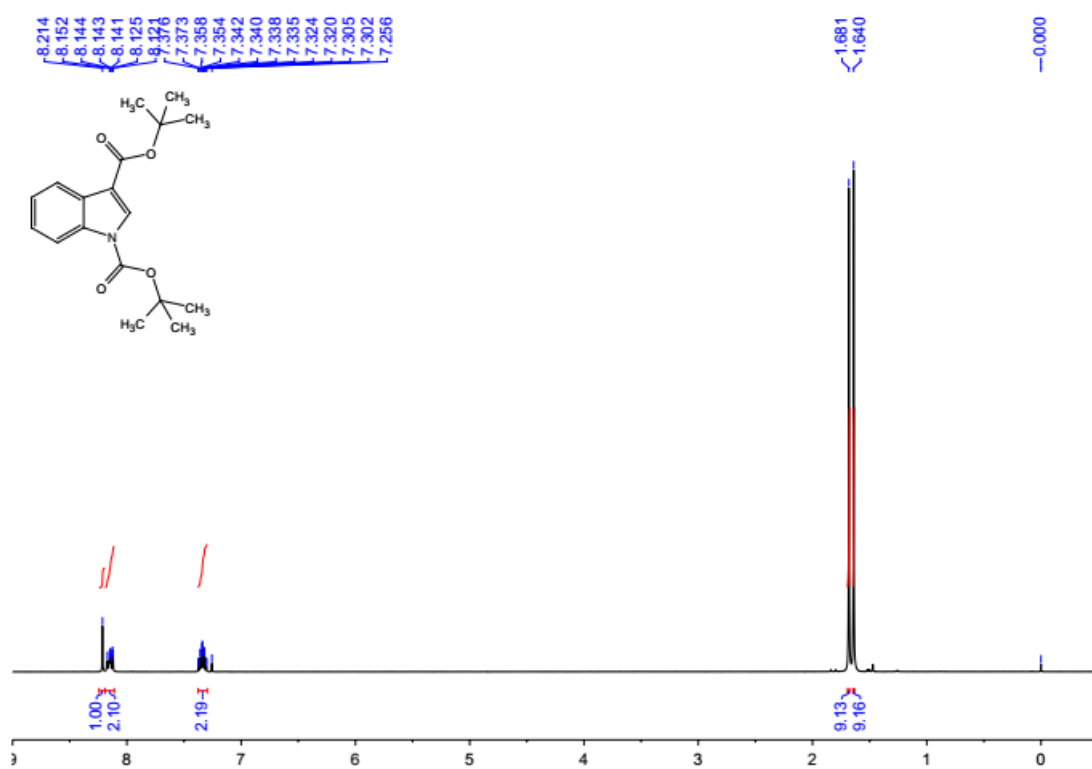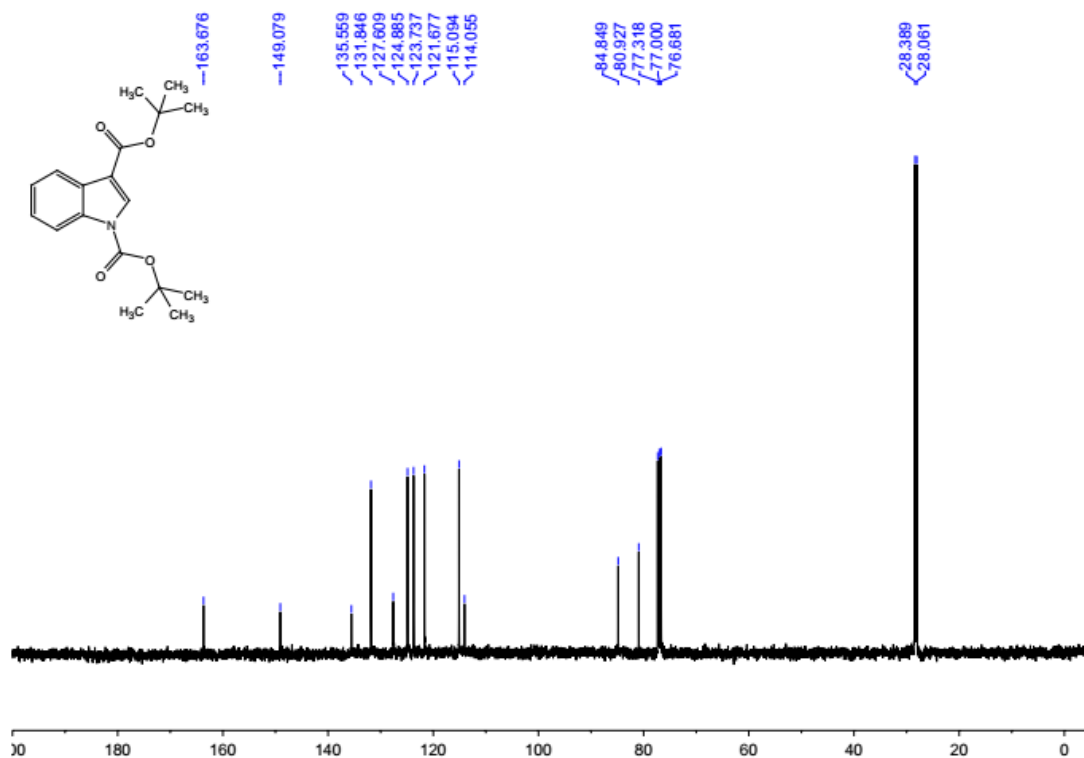

# Compound 1e

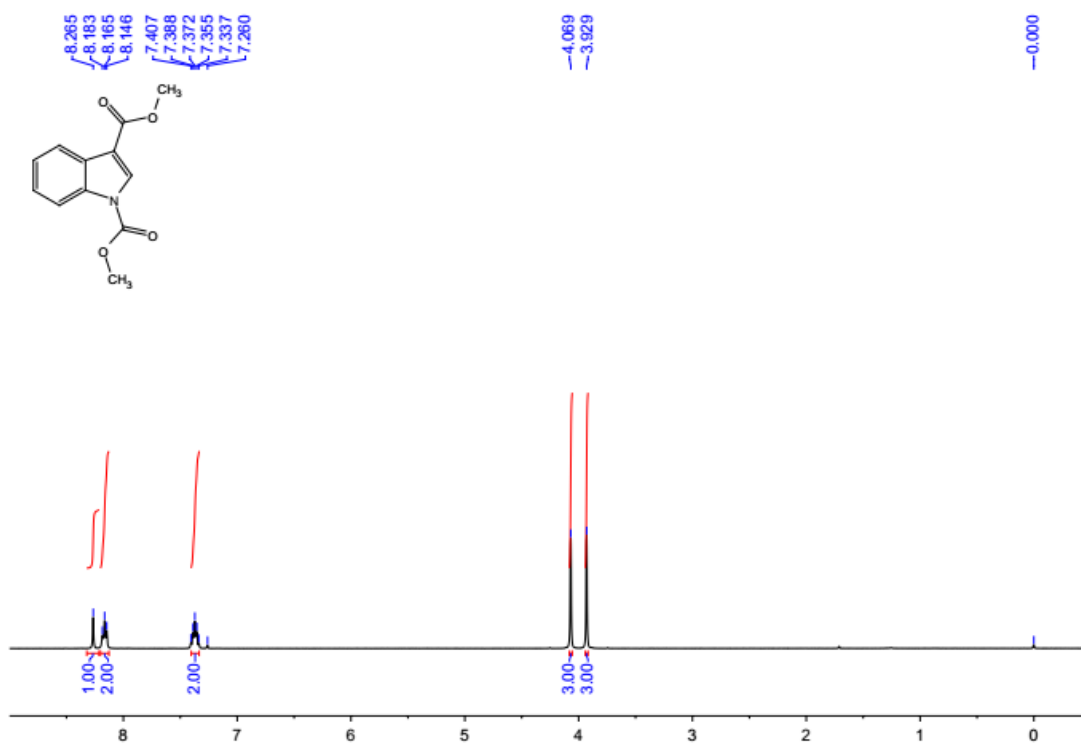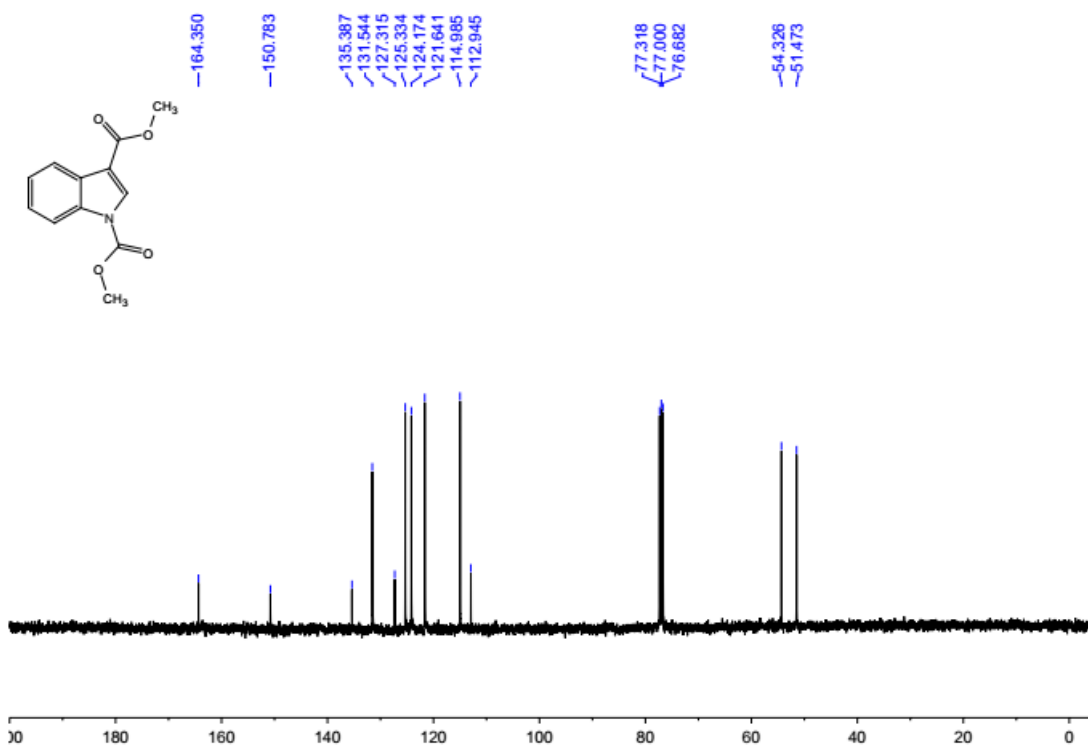

# Compound 1f

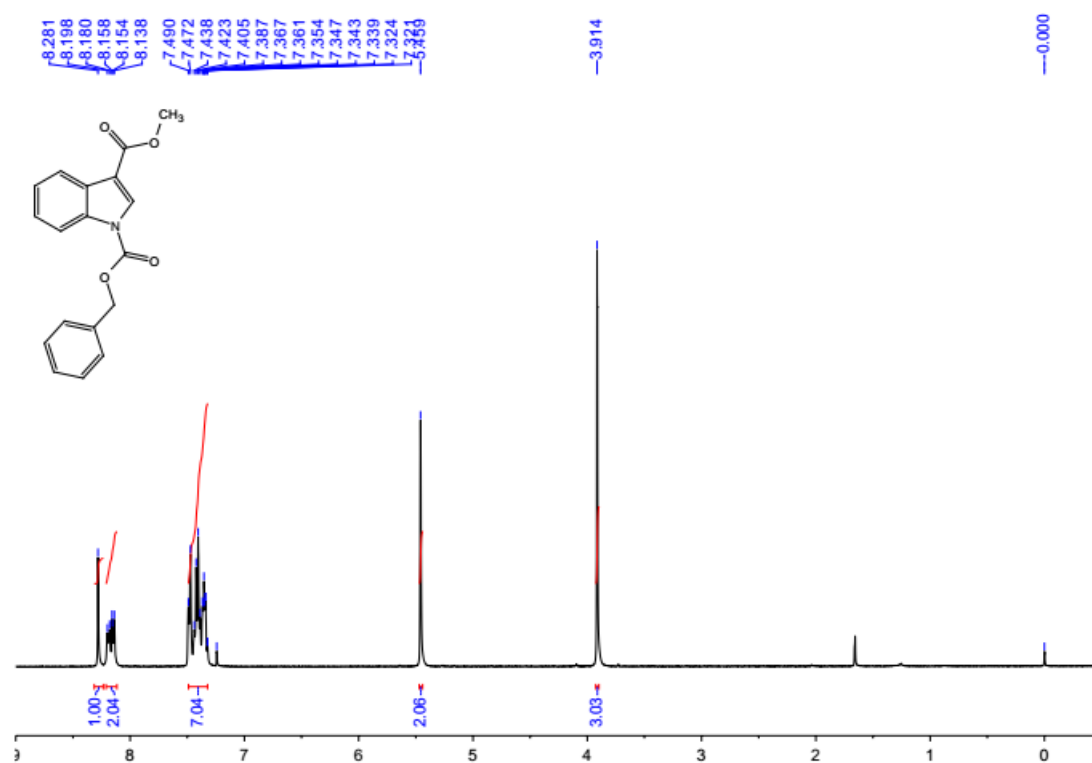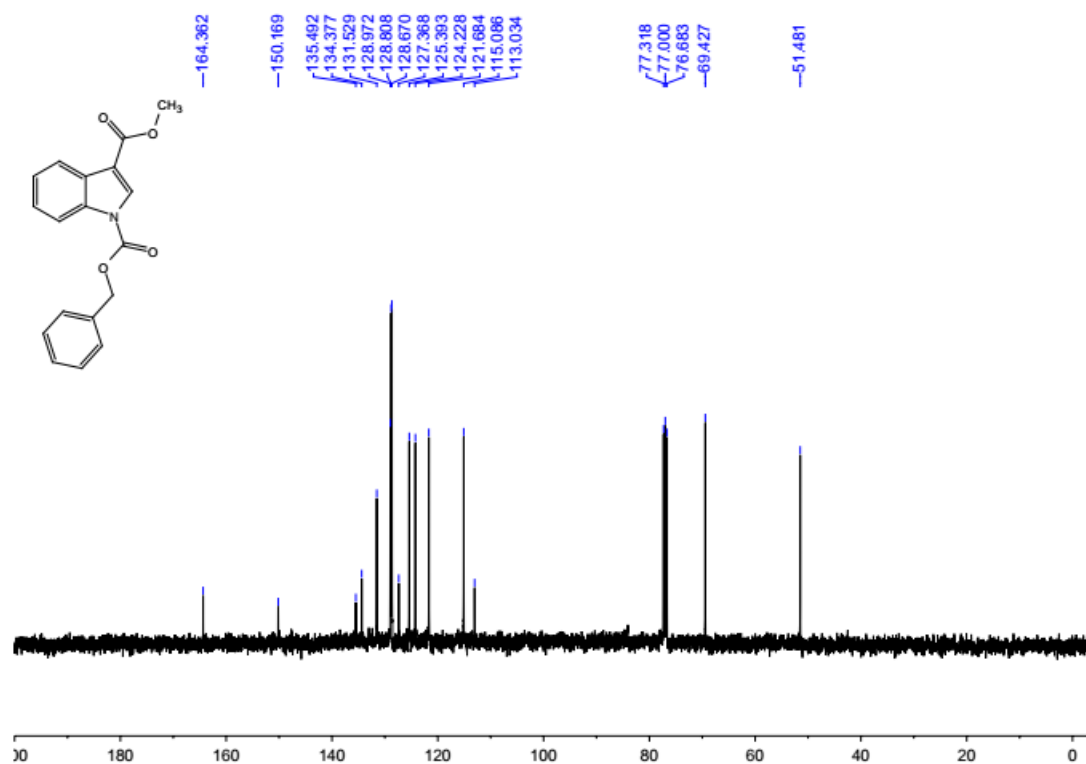

# Compound 1g

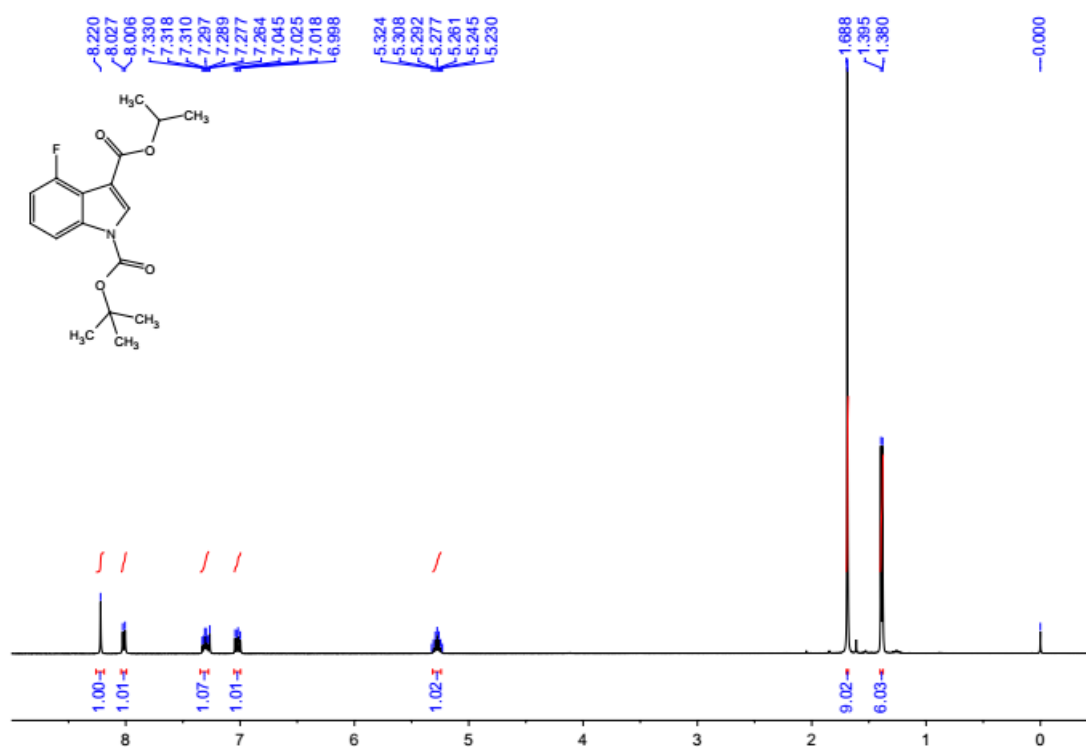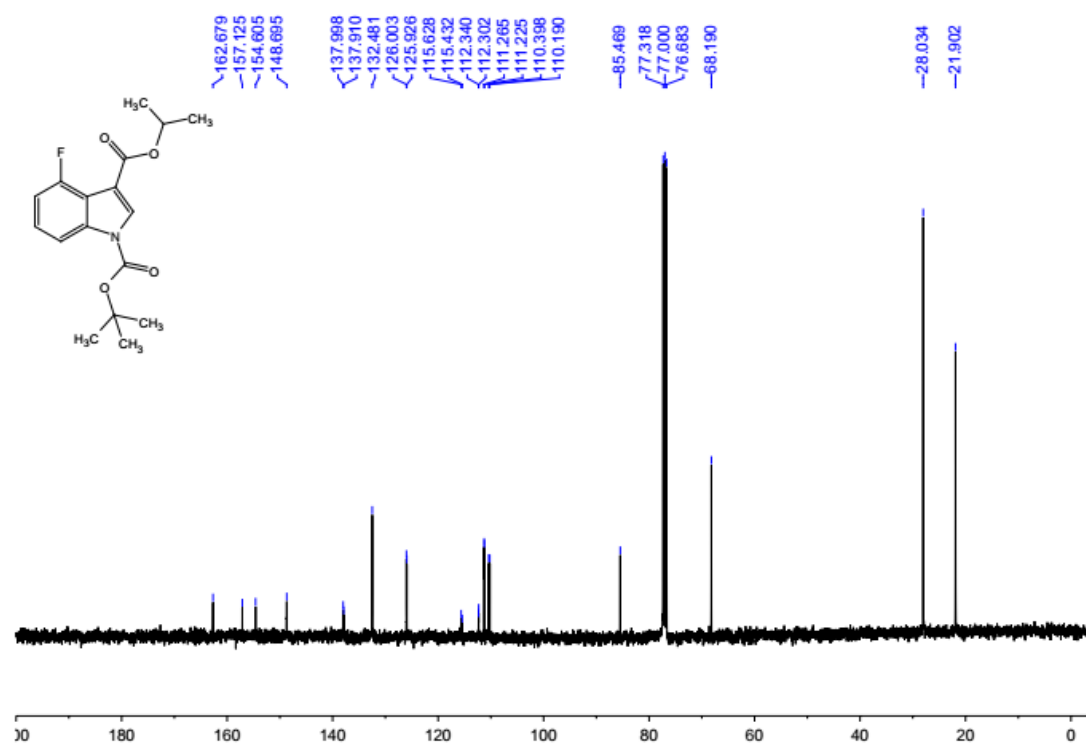

# Compound 1h

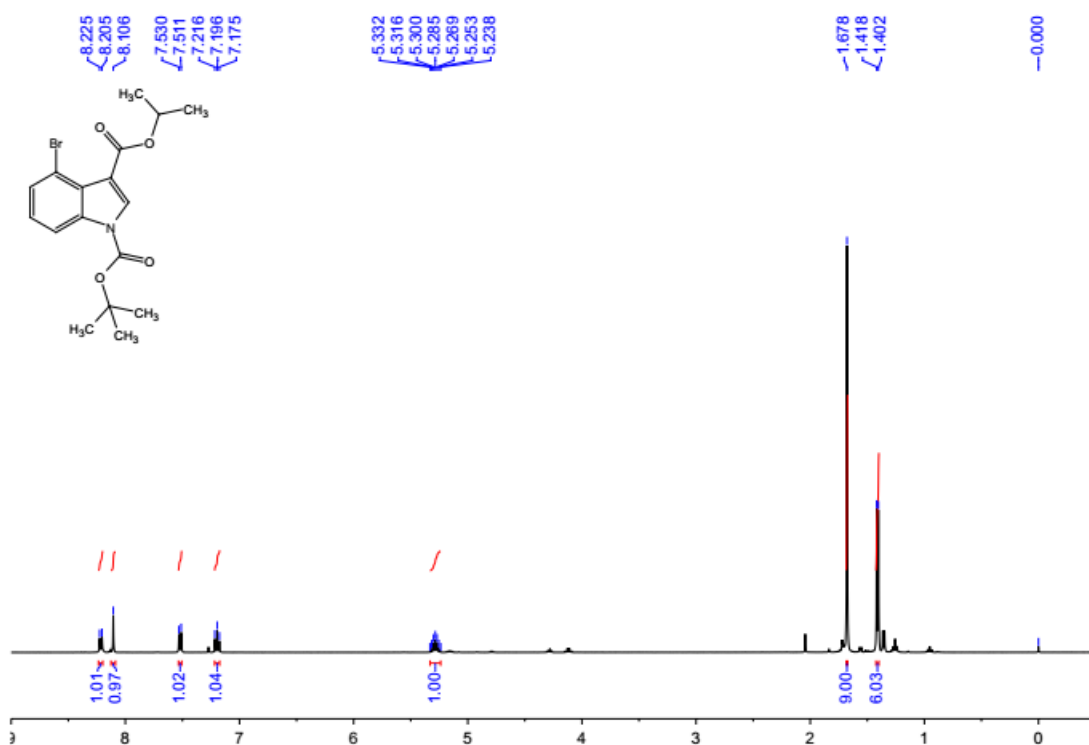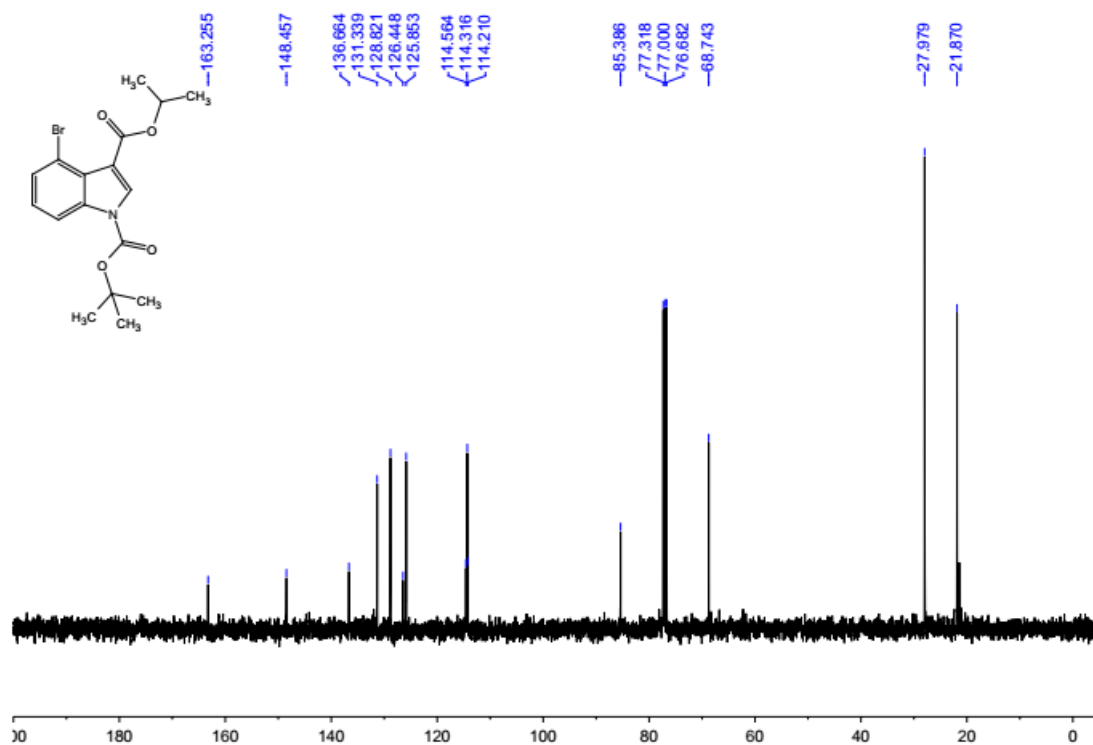

# Compound 1i

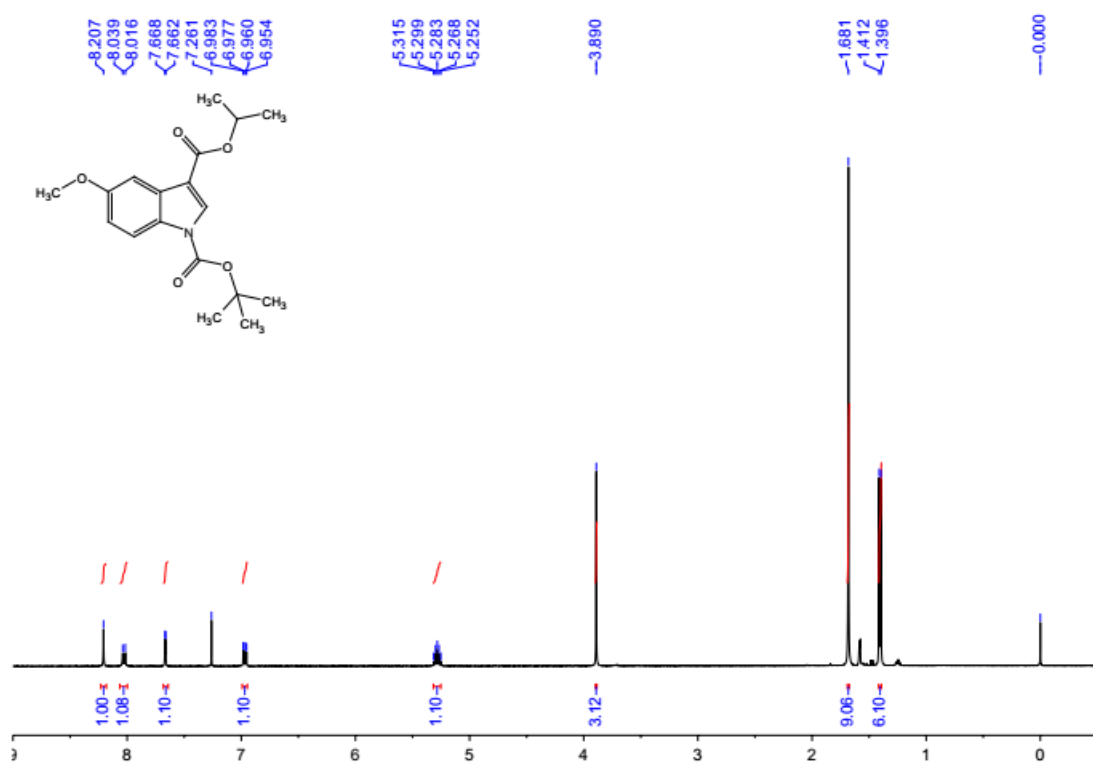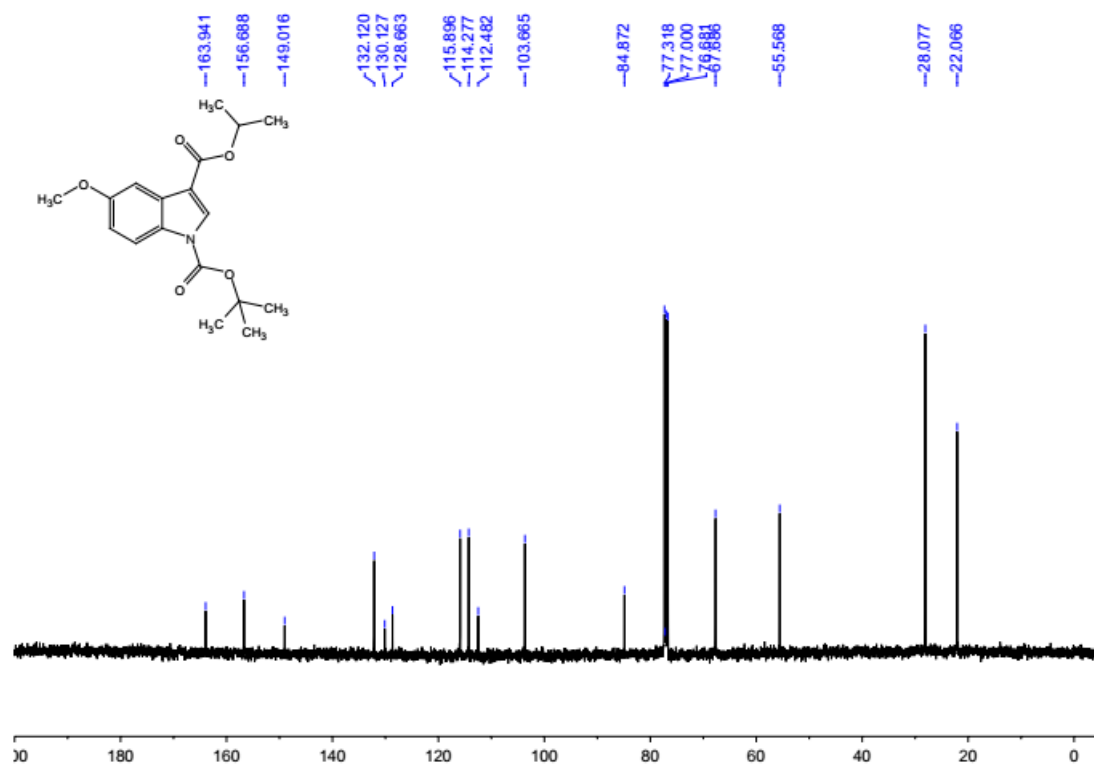

# Compound 1j

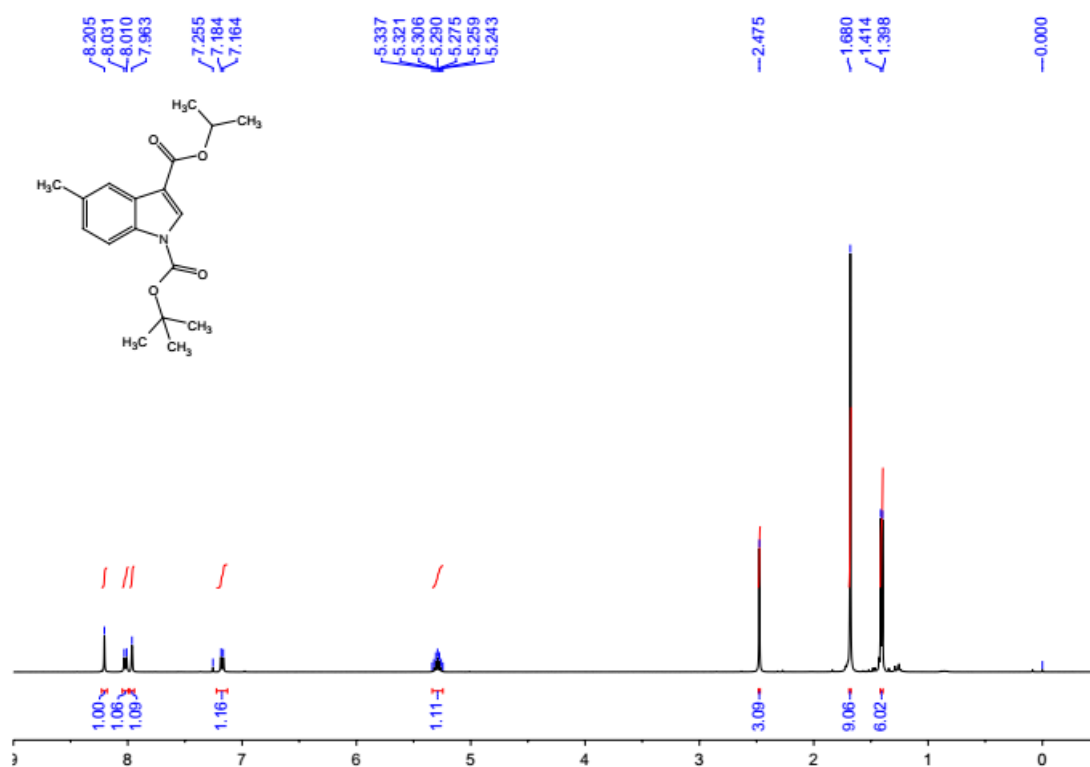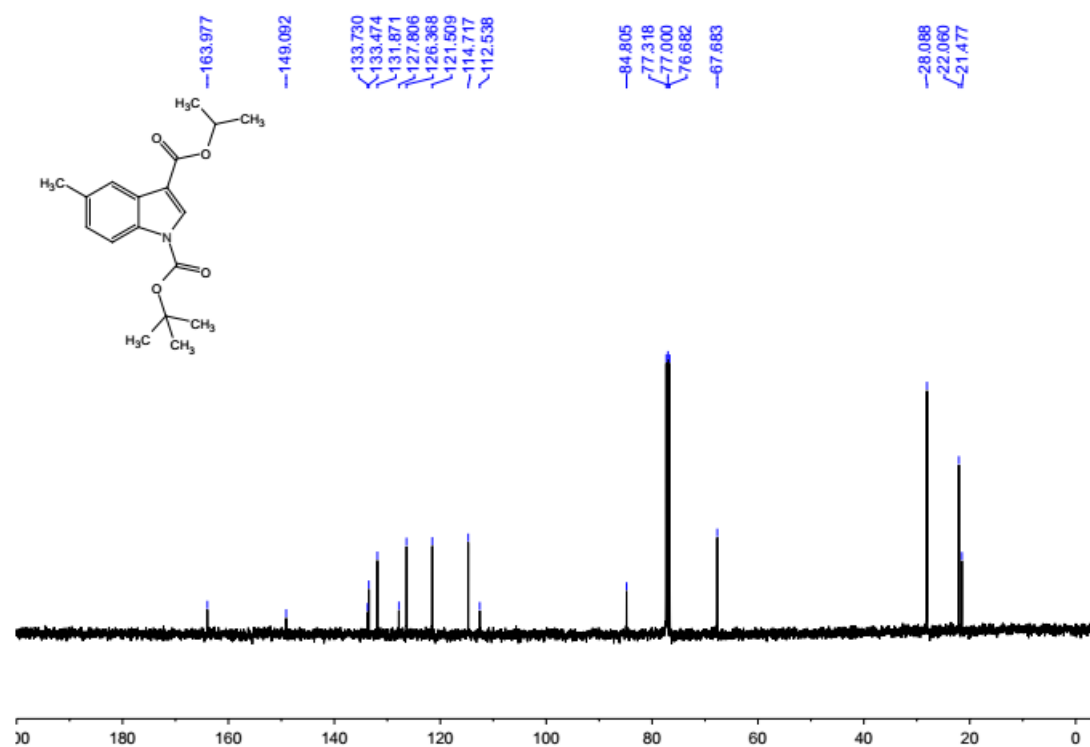

# Compound 1k

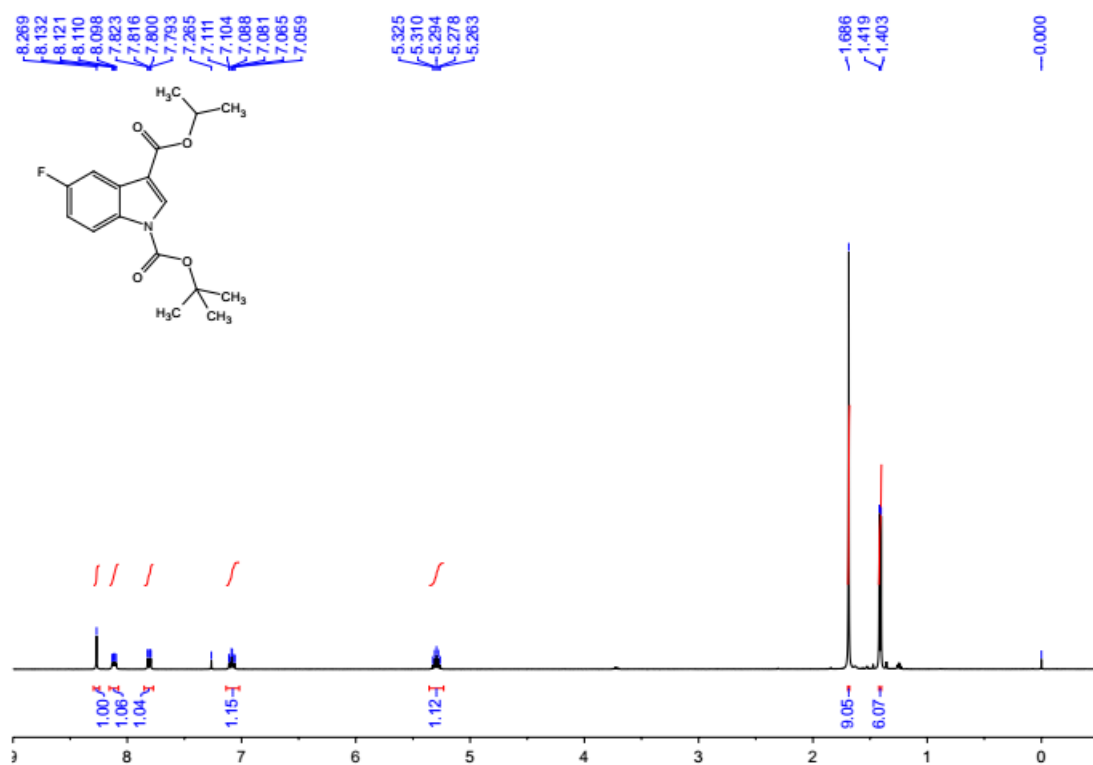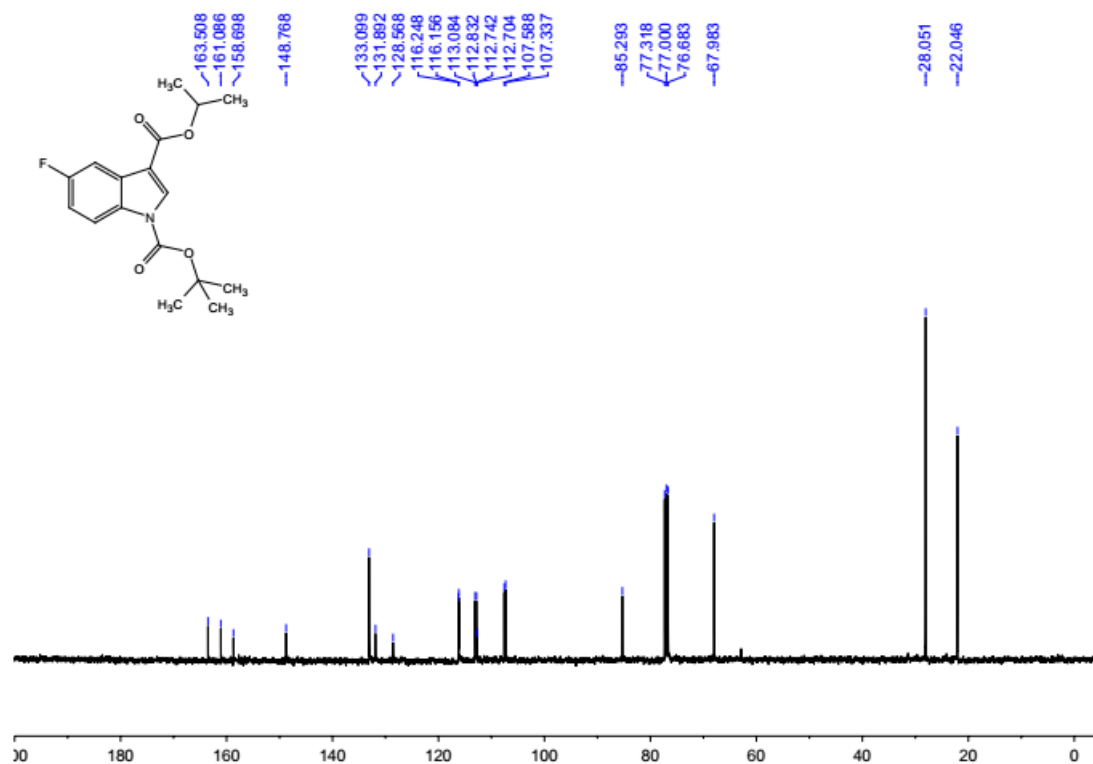



# Compound 11

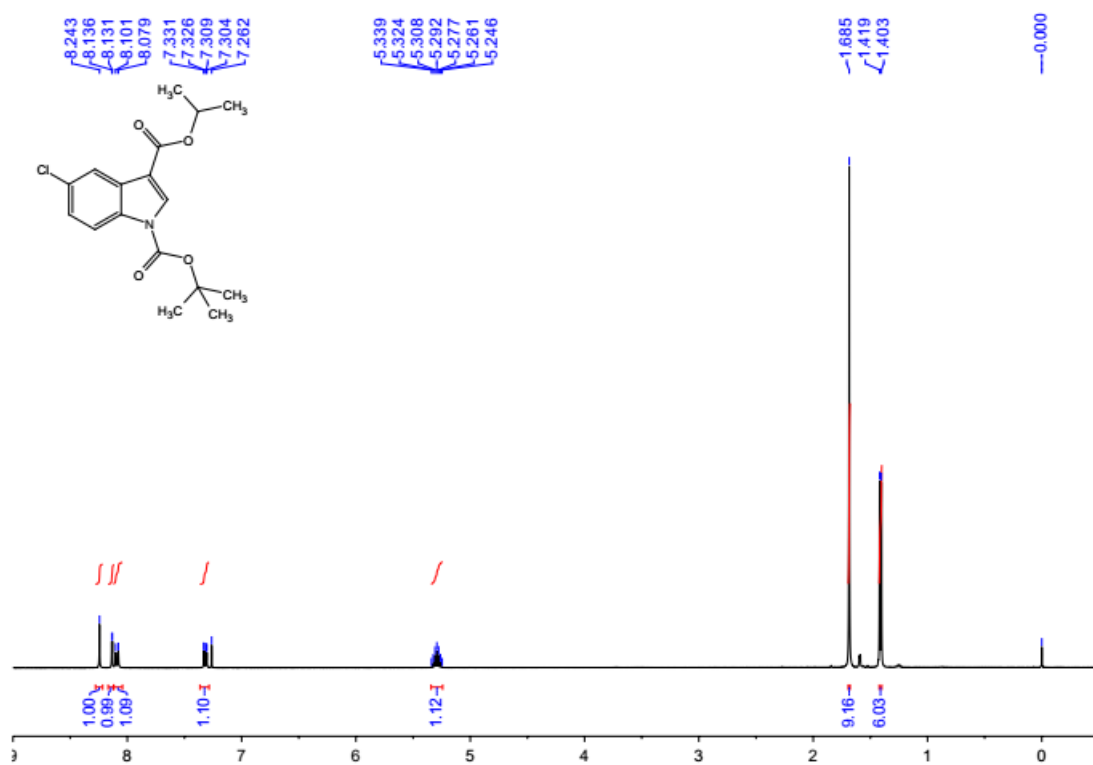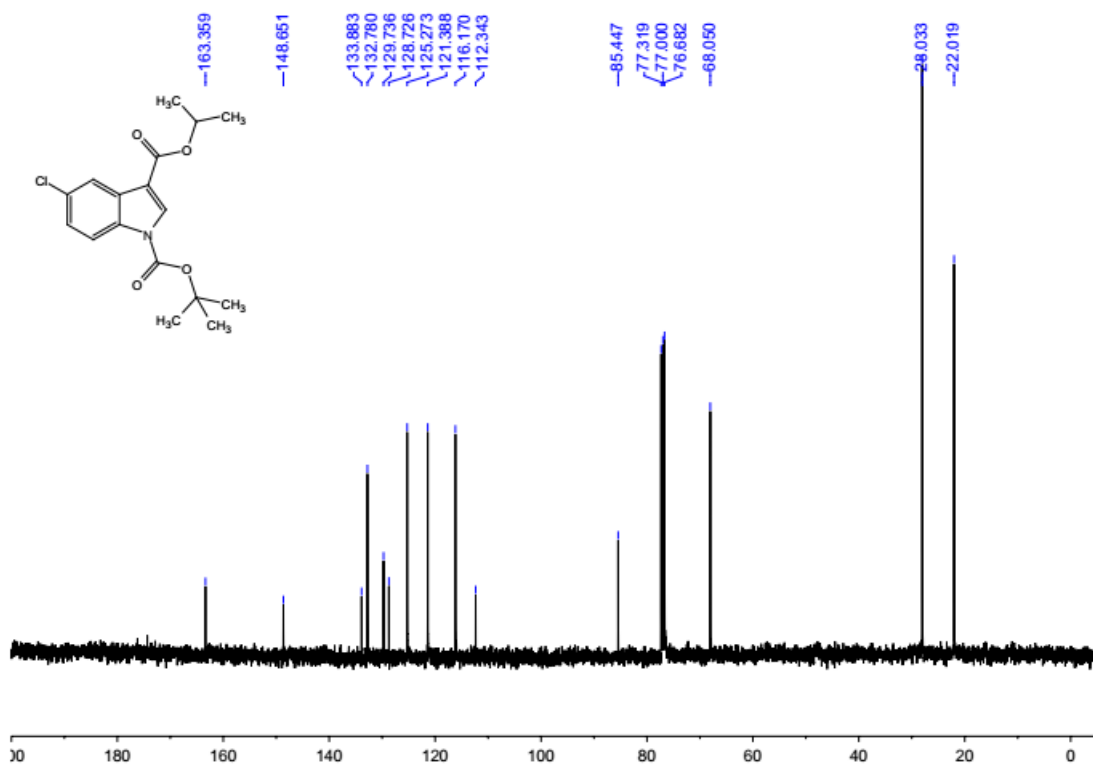

# Compound 1m

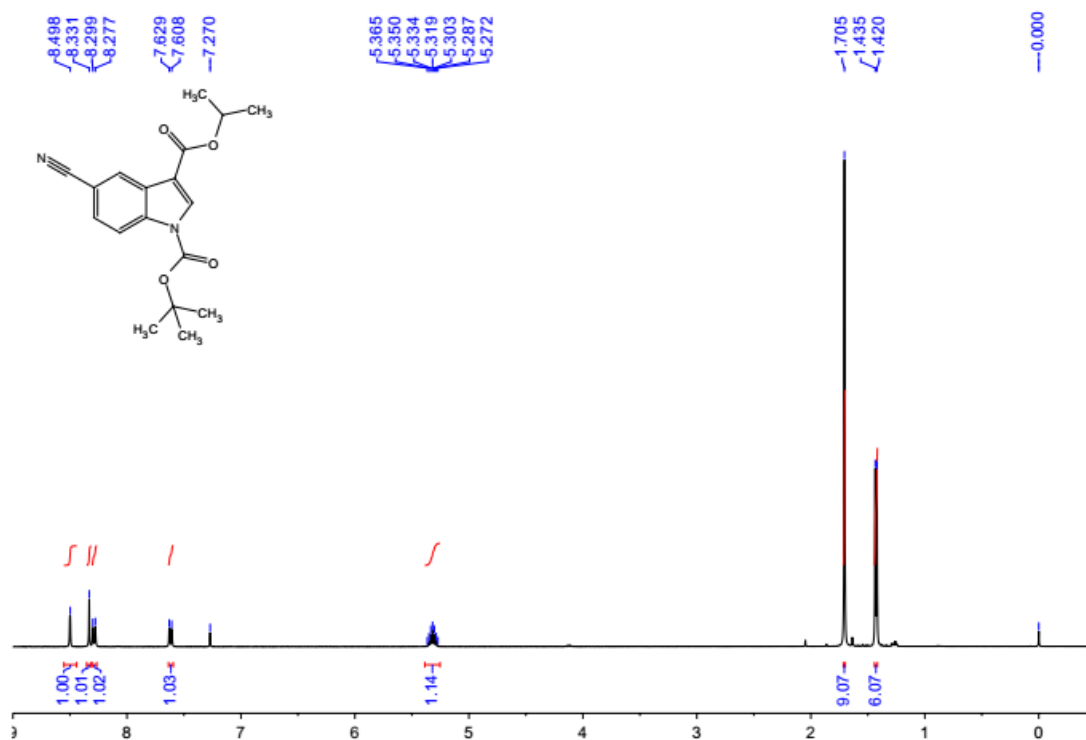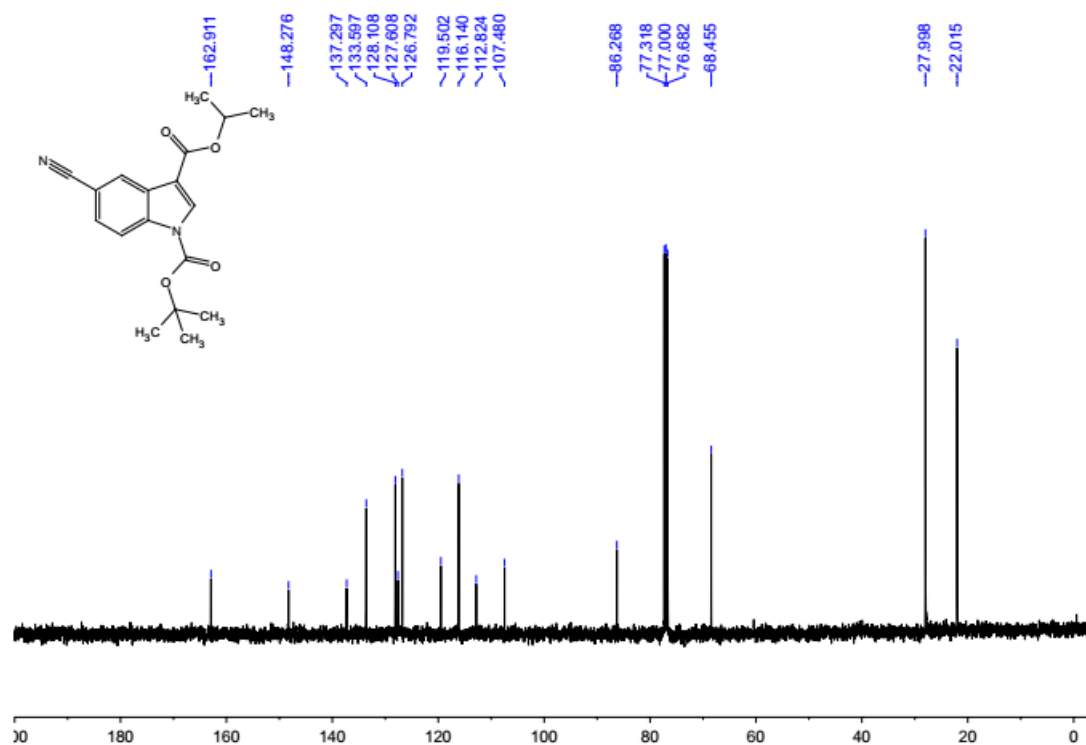

# Compound 1n

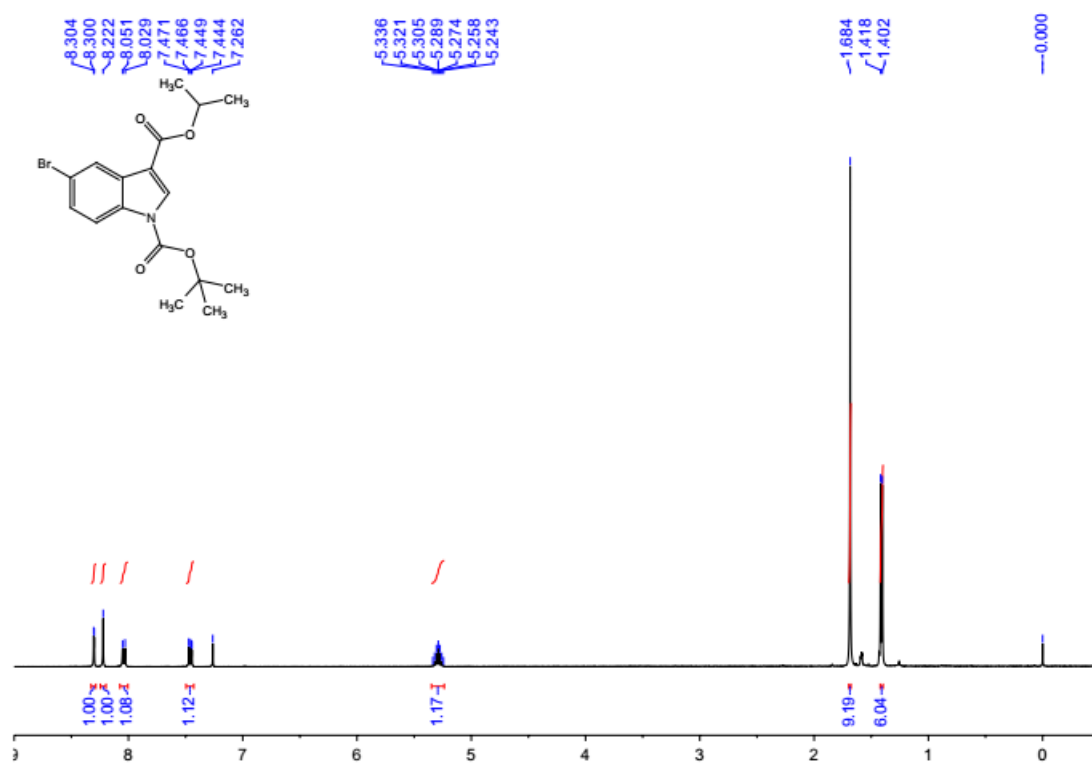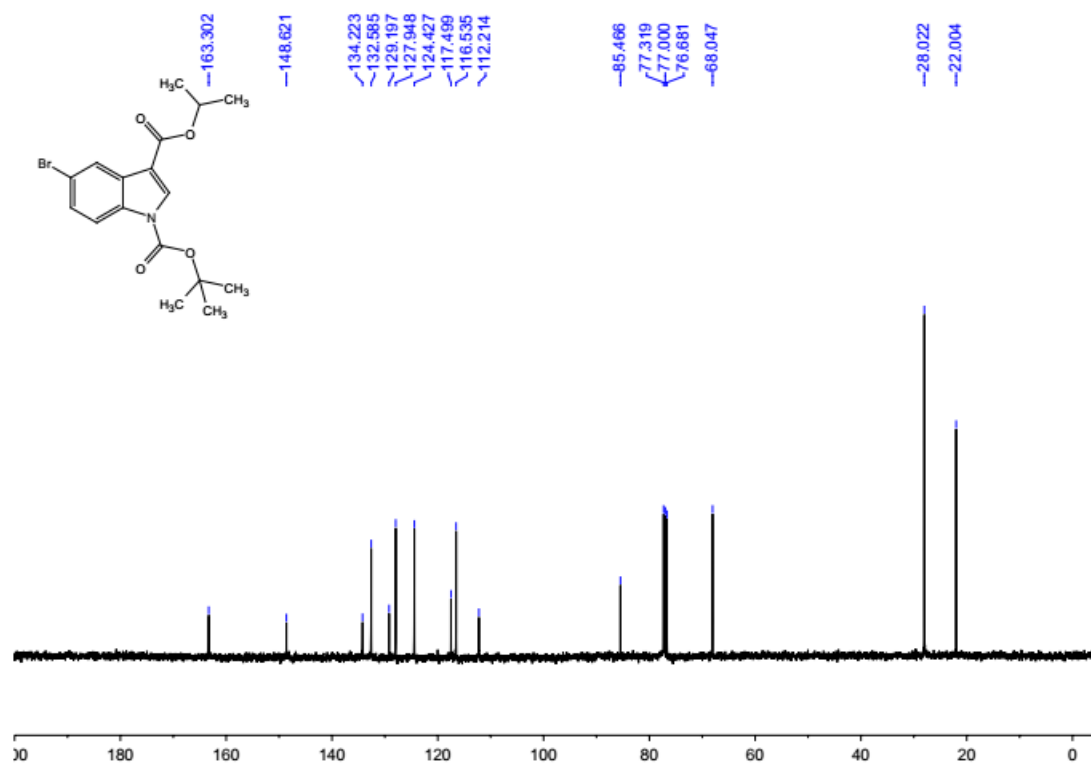

# Compound 1o

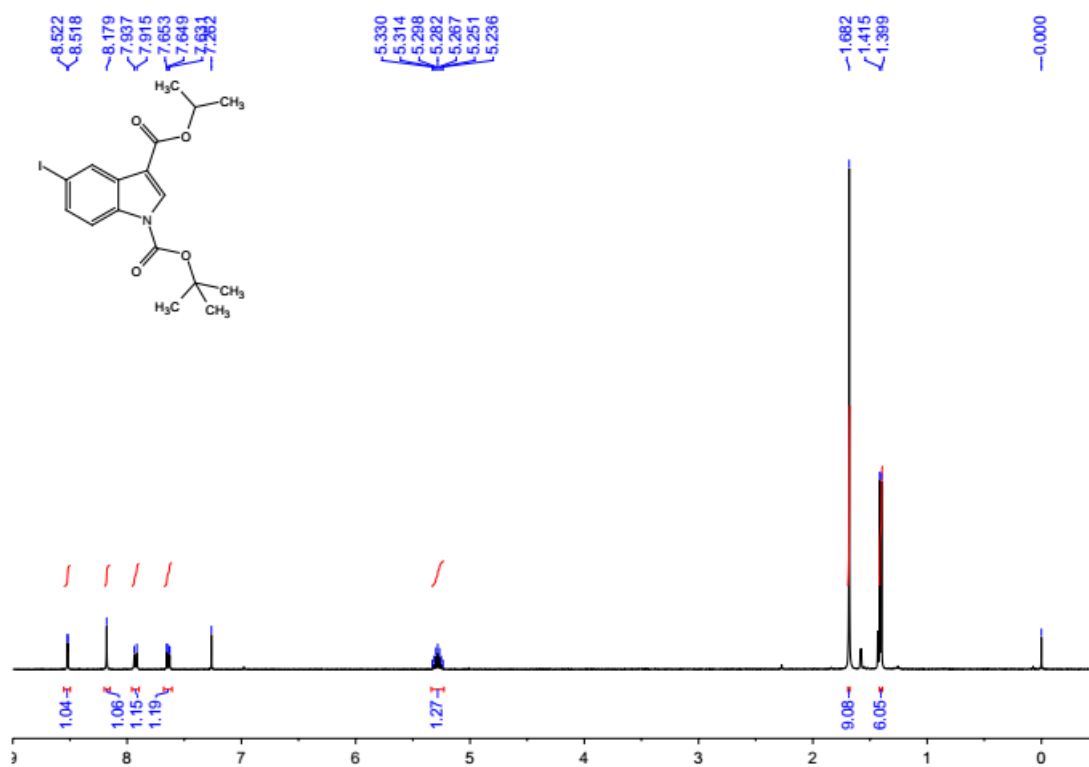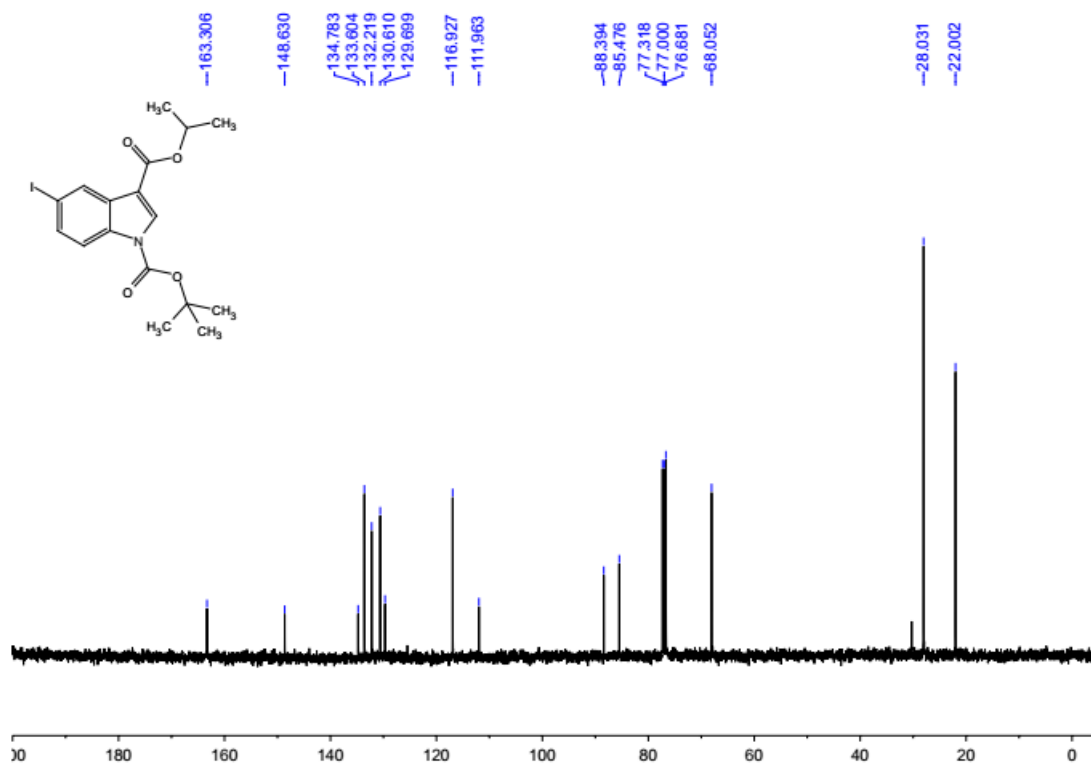

# Compound 1p

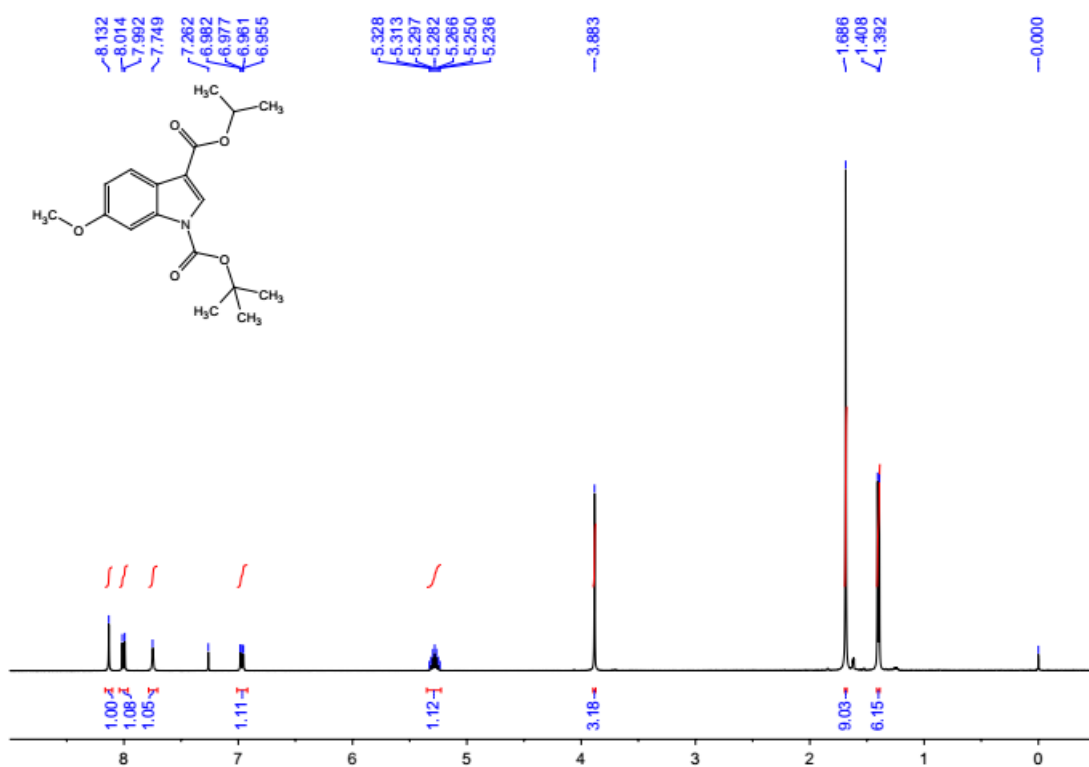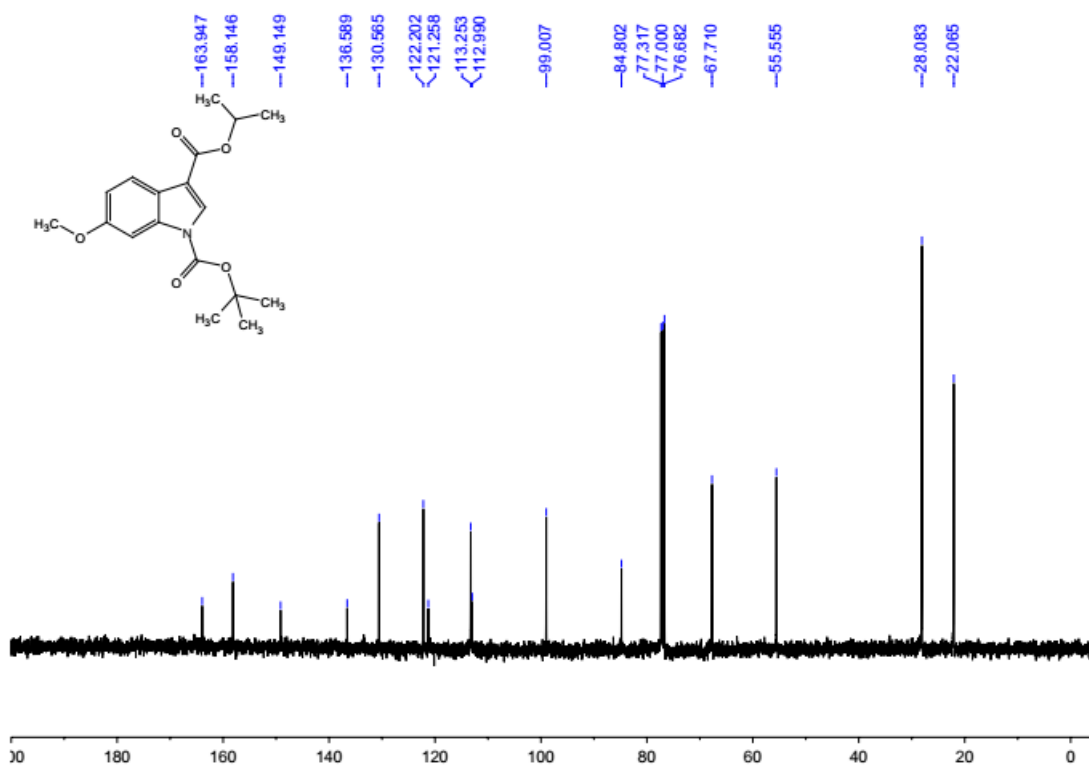

# Compound 1q

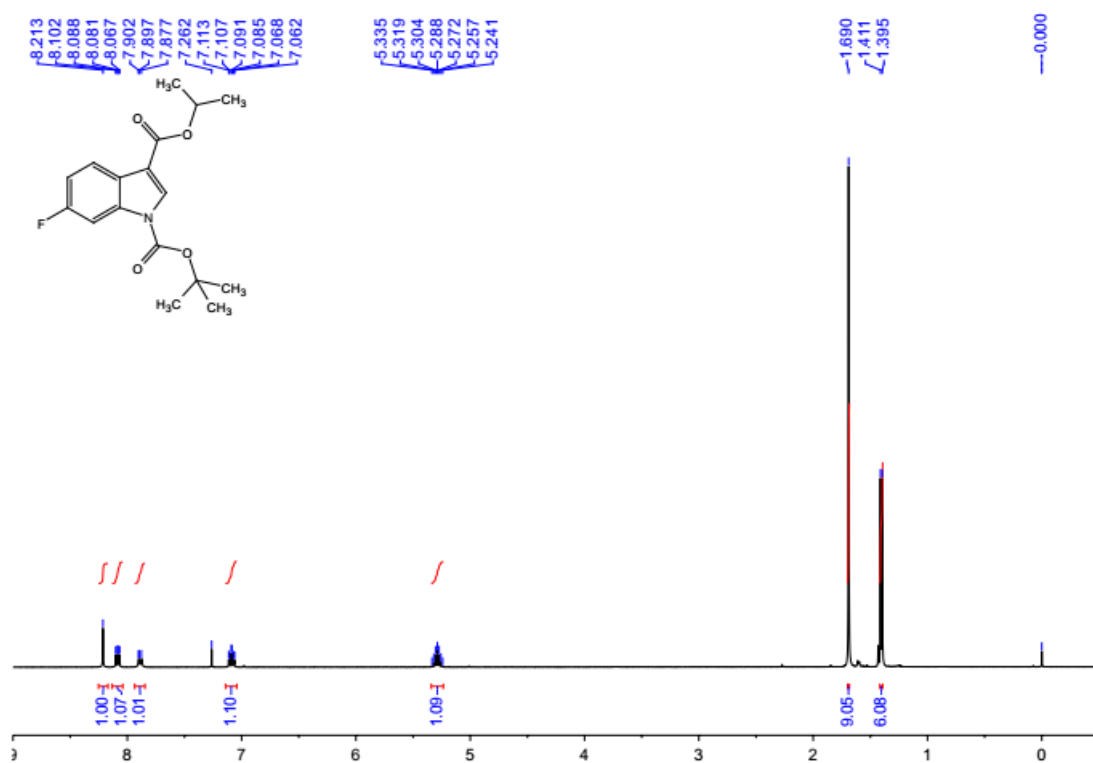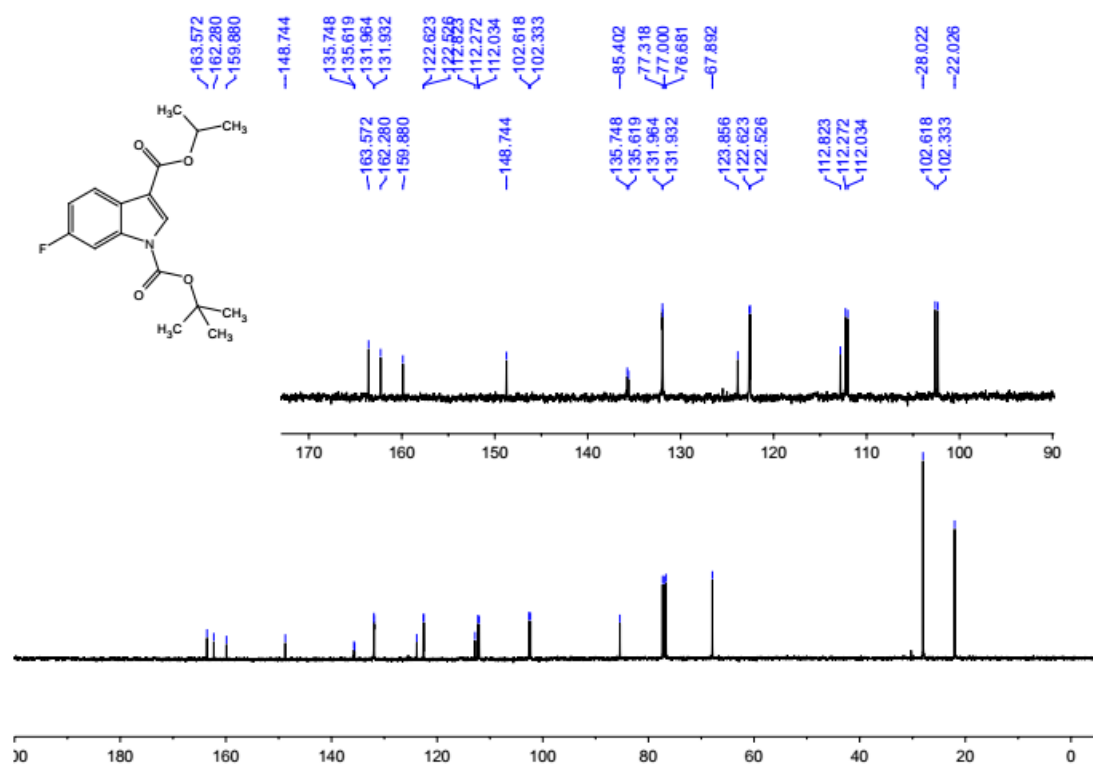

# Compound 1r

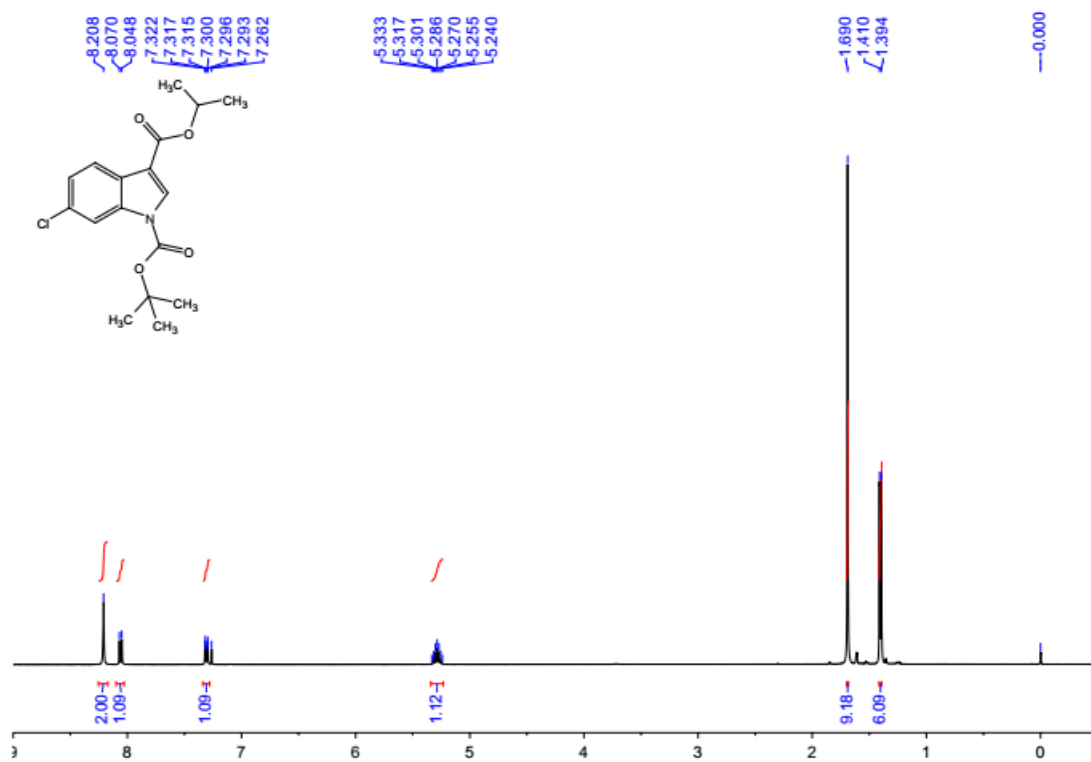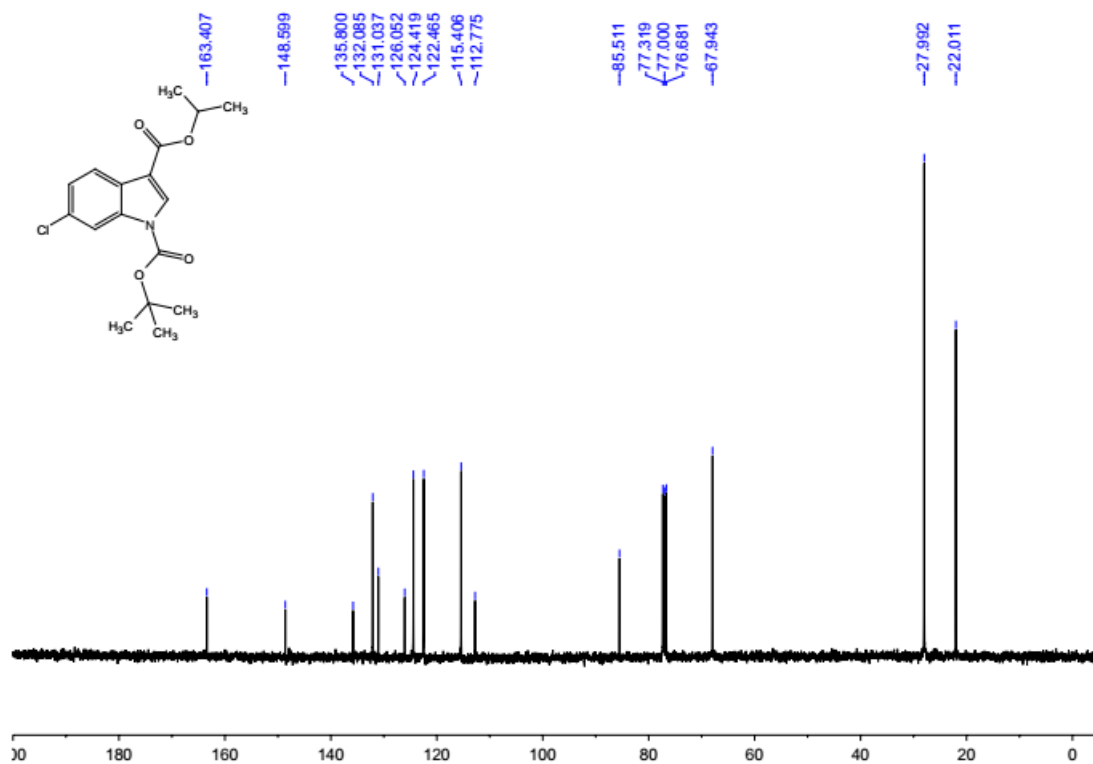

# Compound 1s

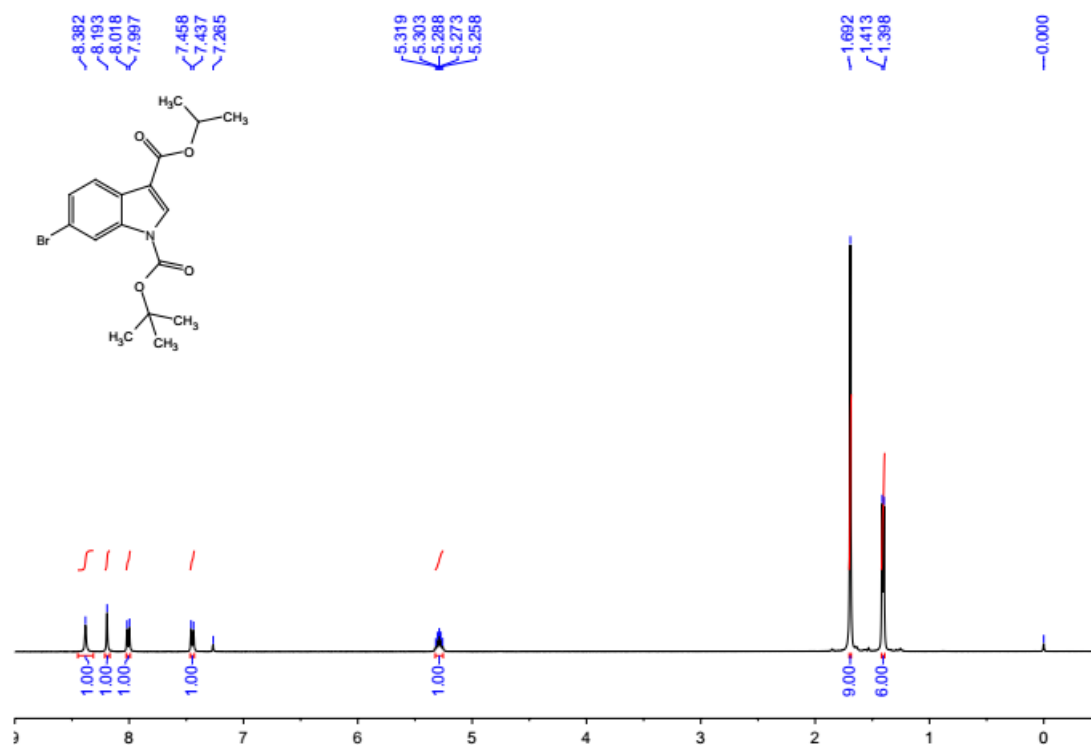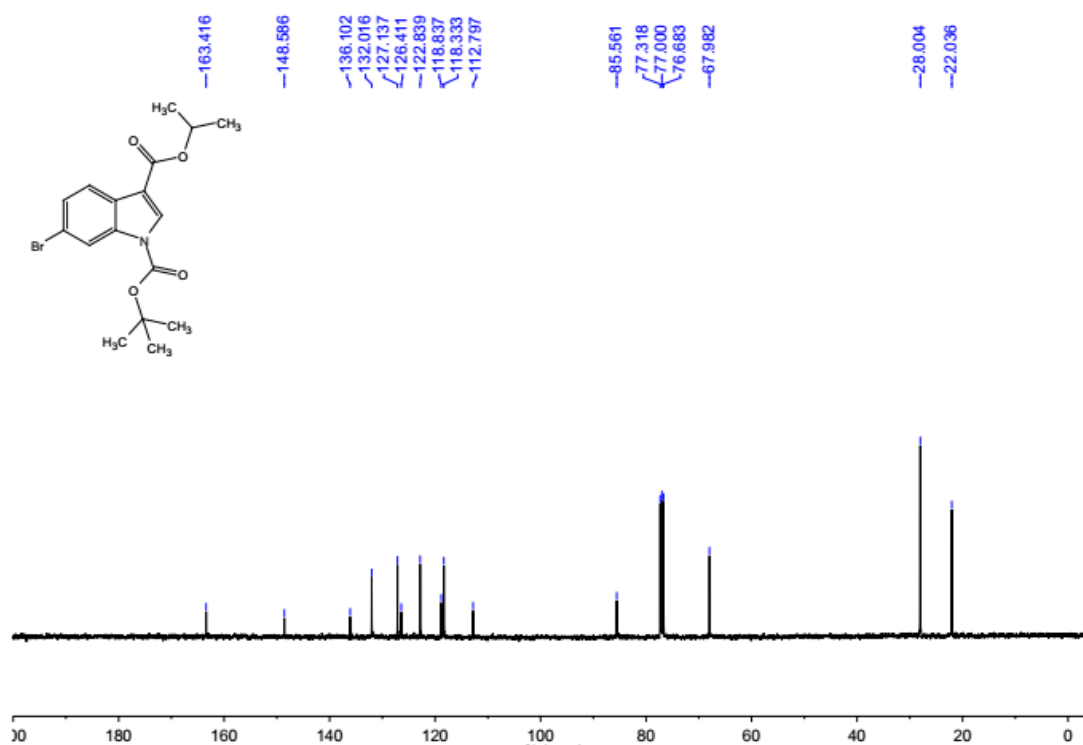



# Compound 1t

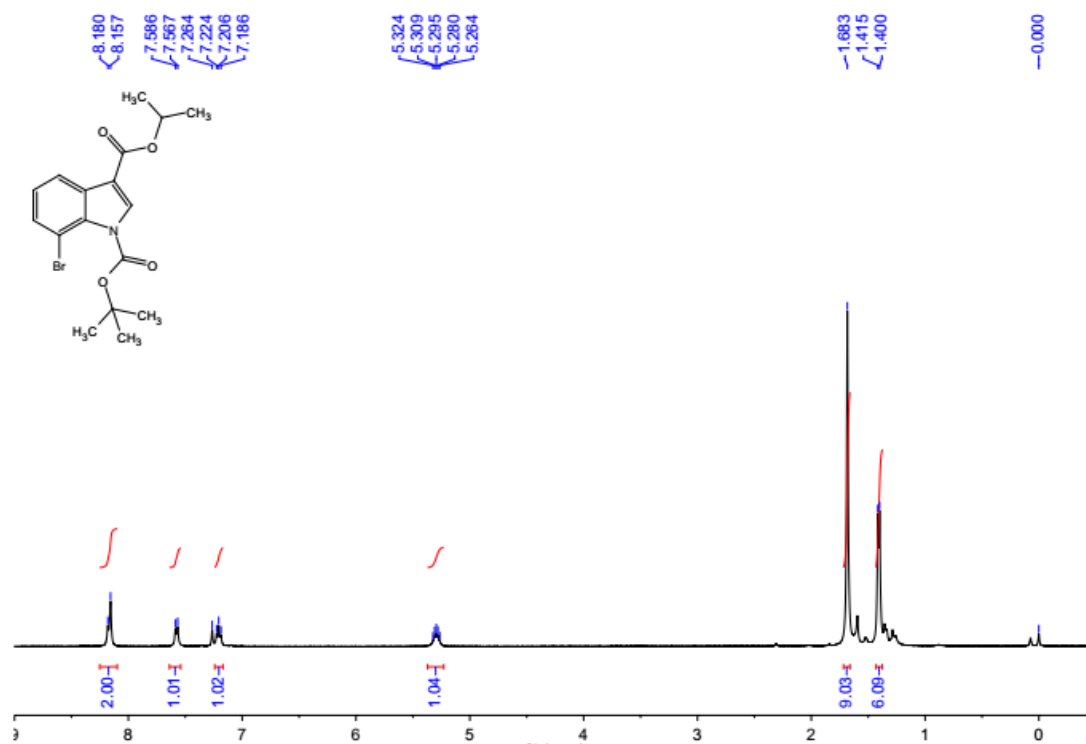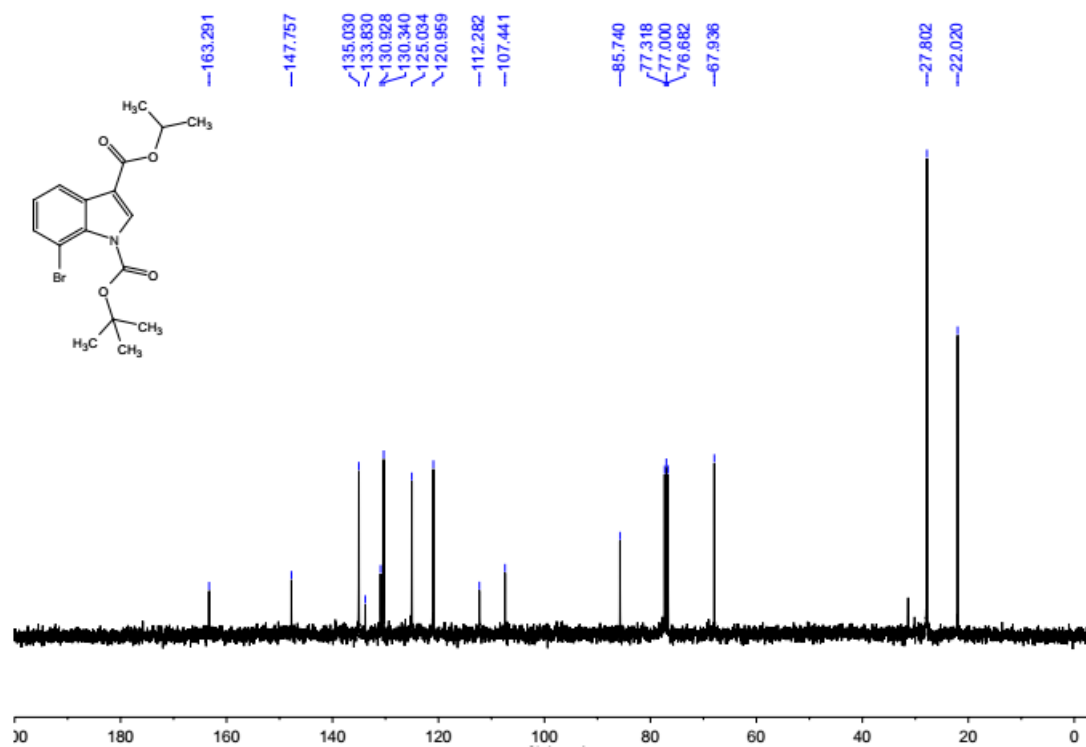

# Compound 1u

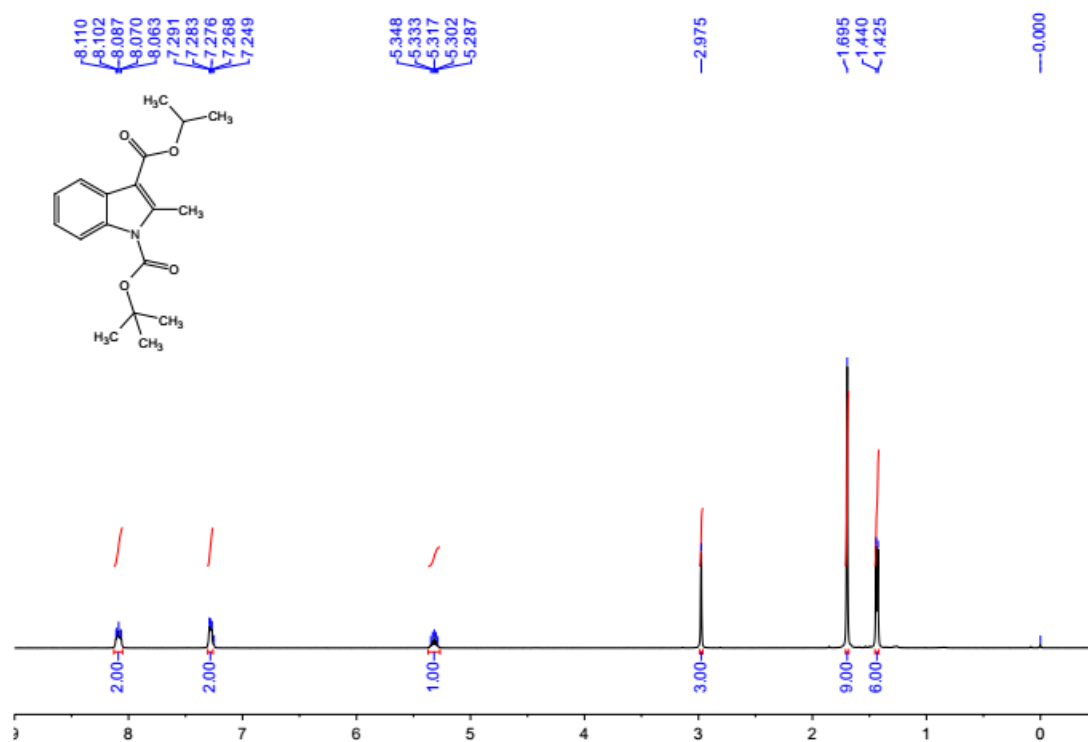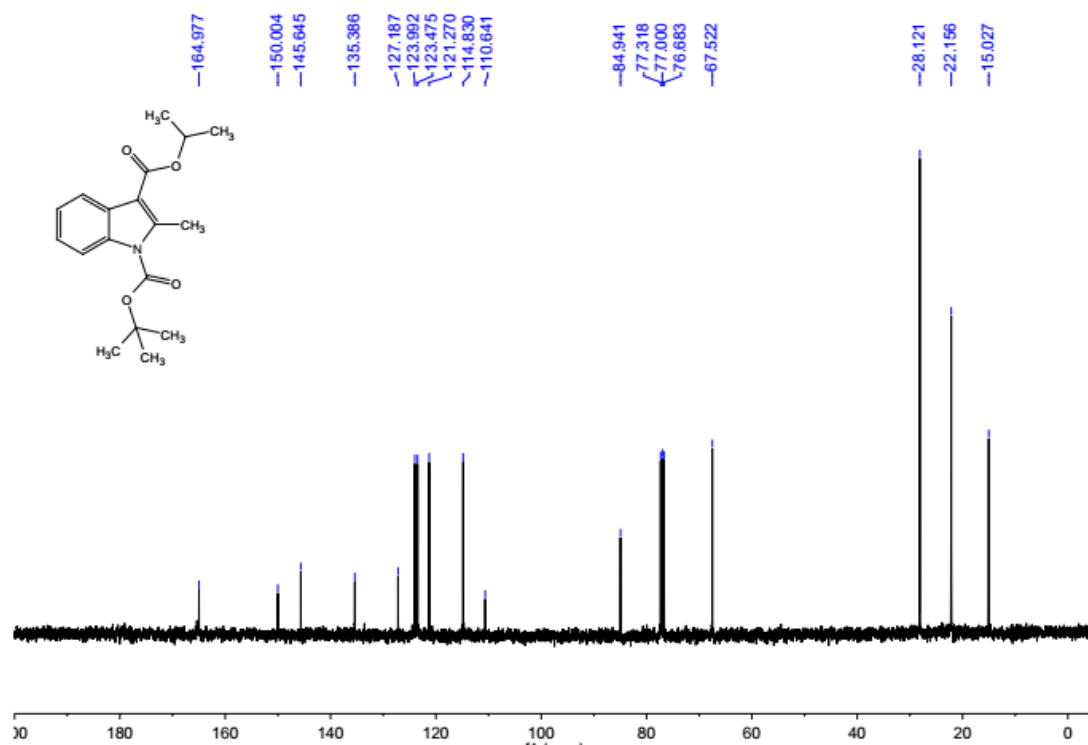

# Compound 1v

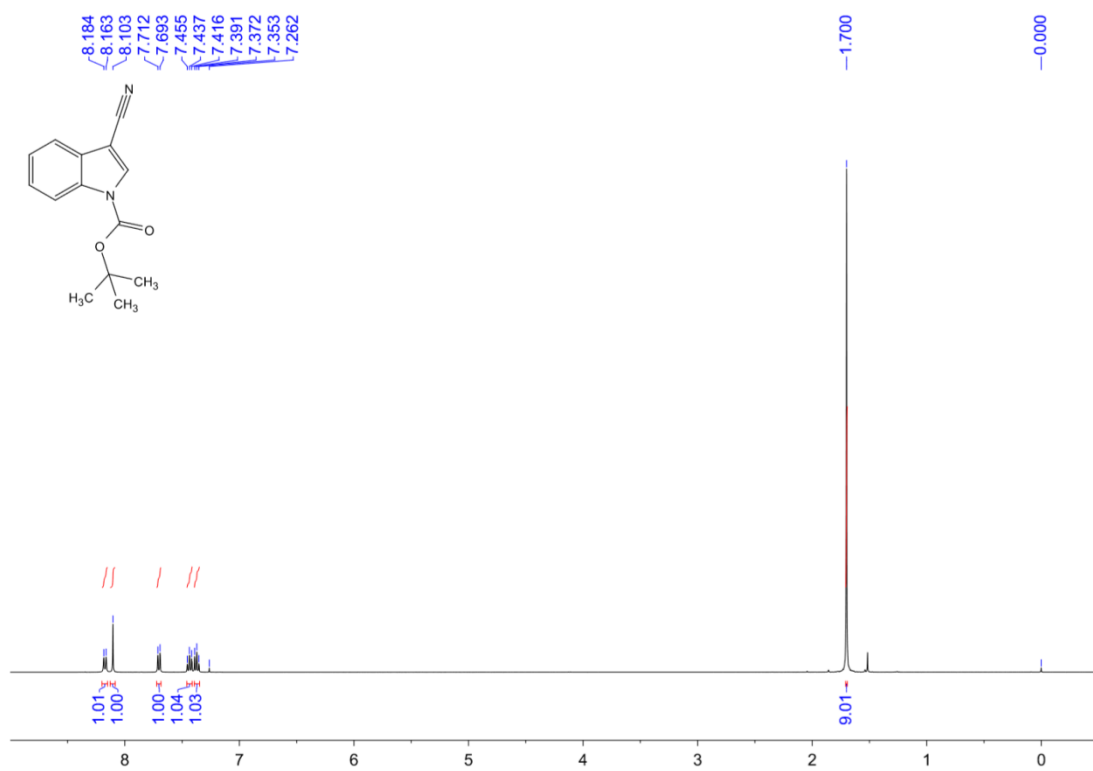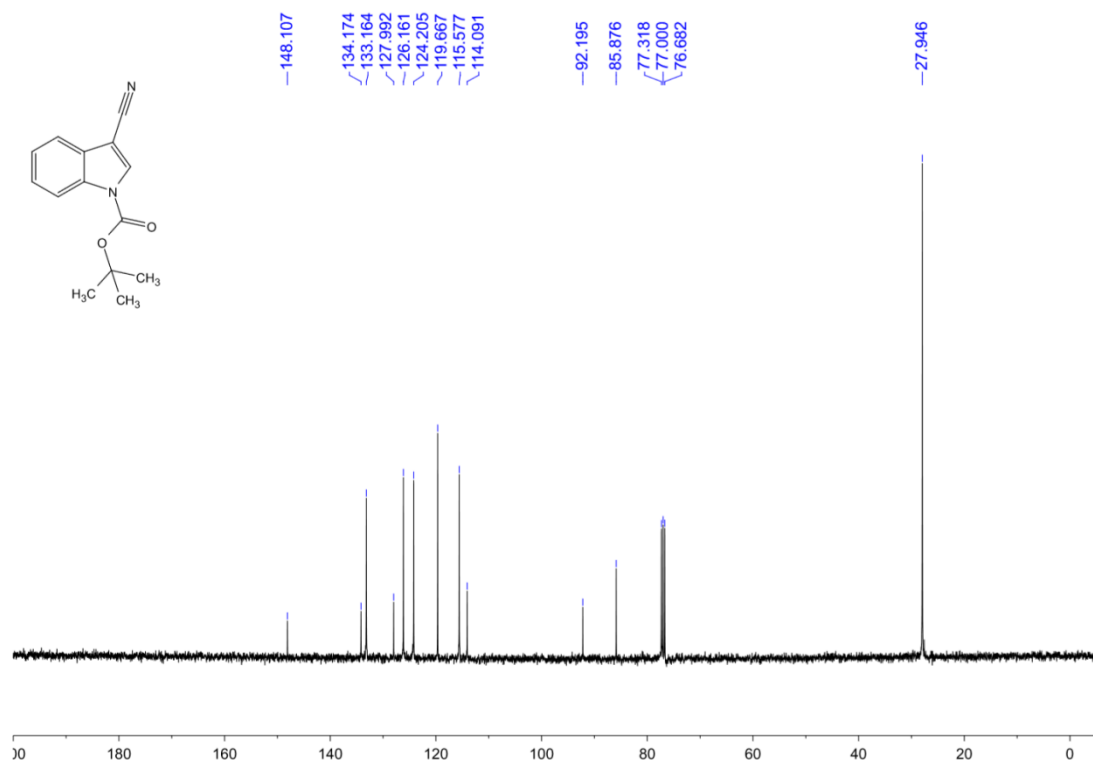

# Compound 1w

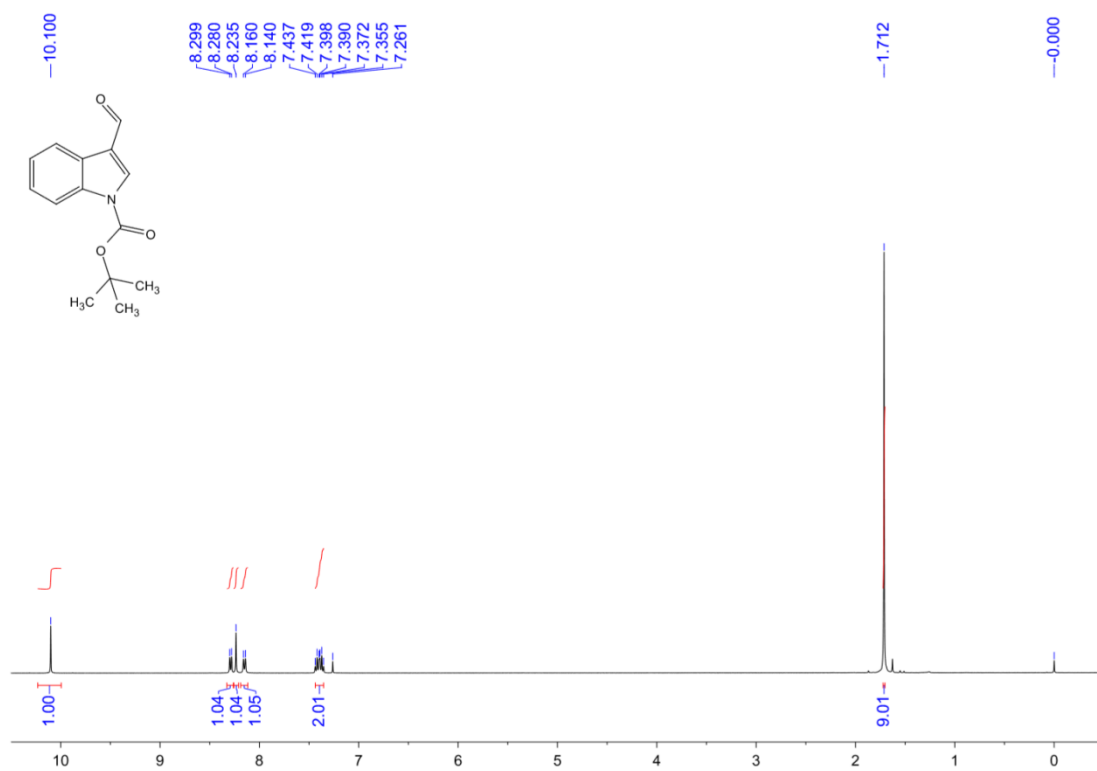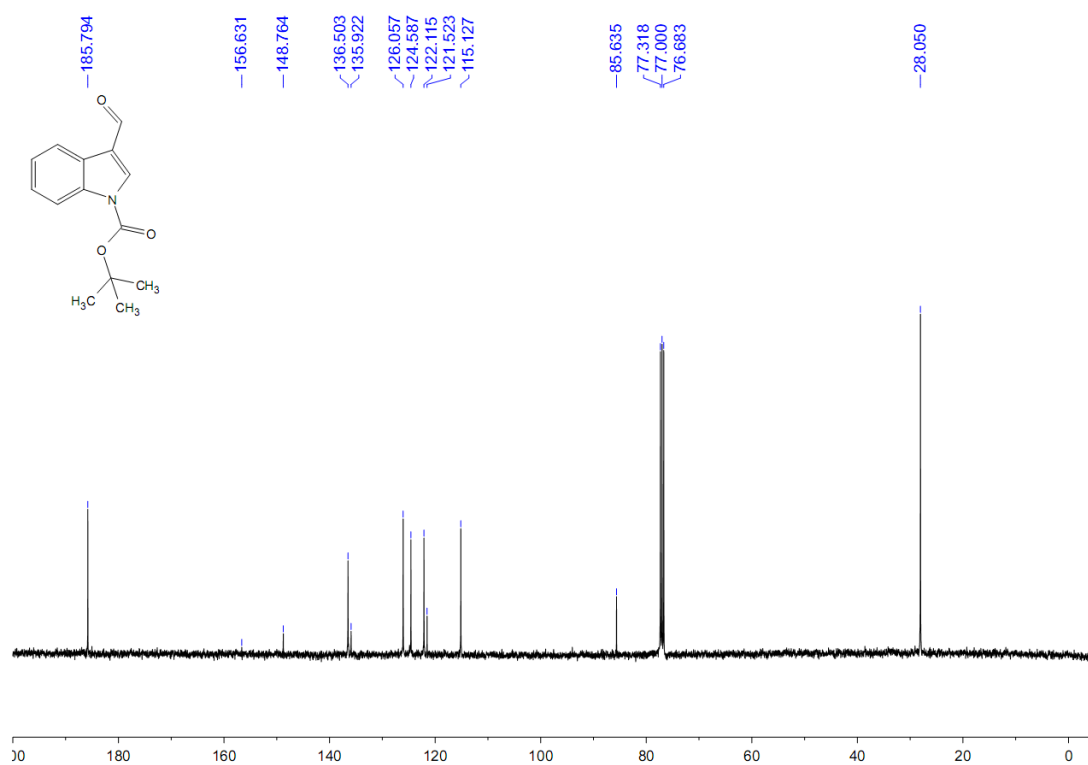

# Compound 1x

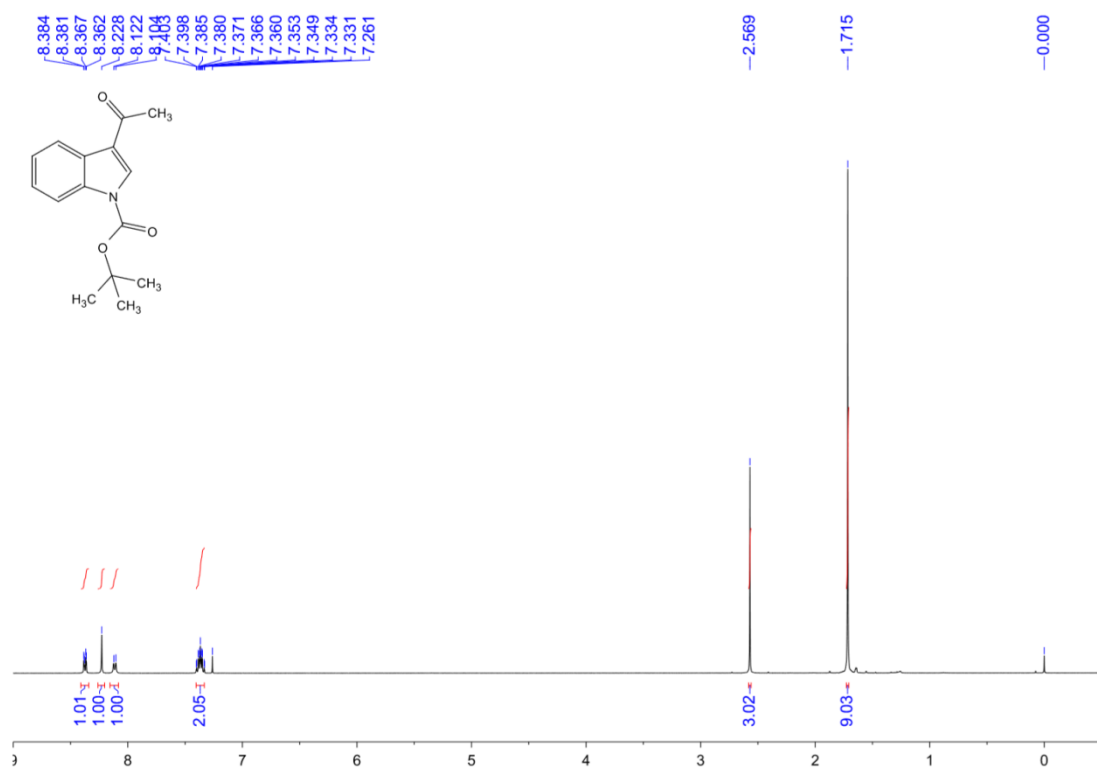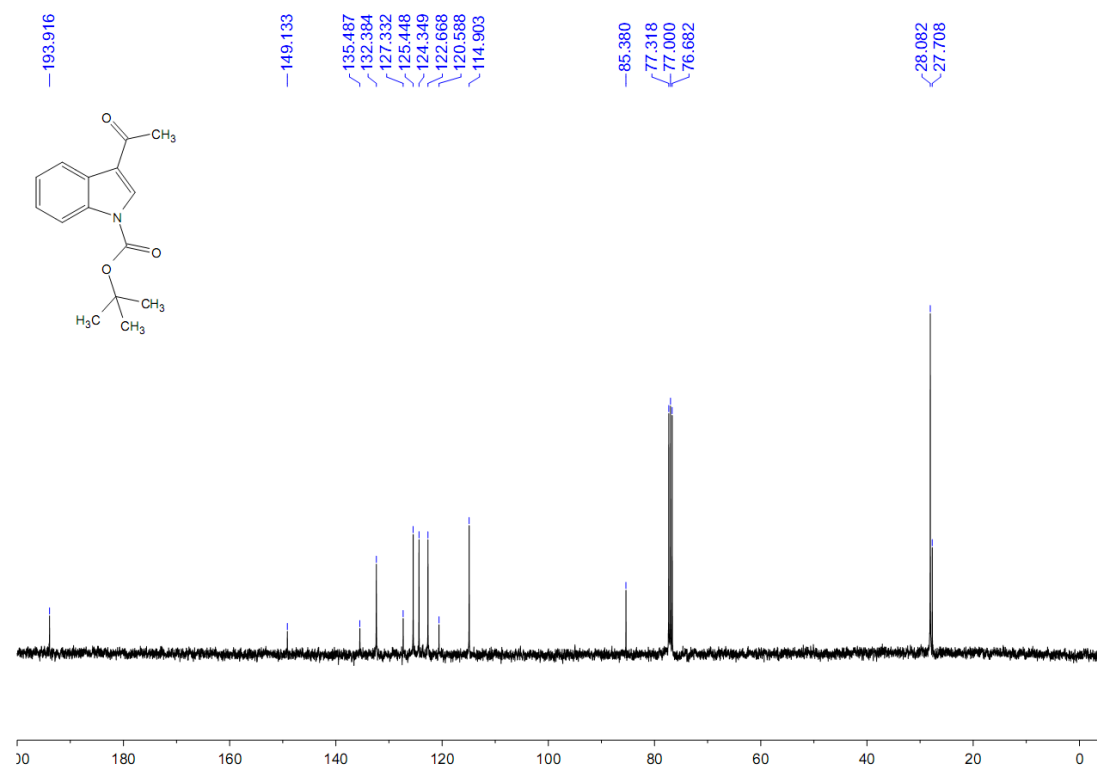

# Compound 1y

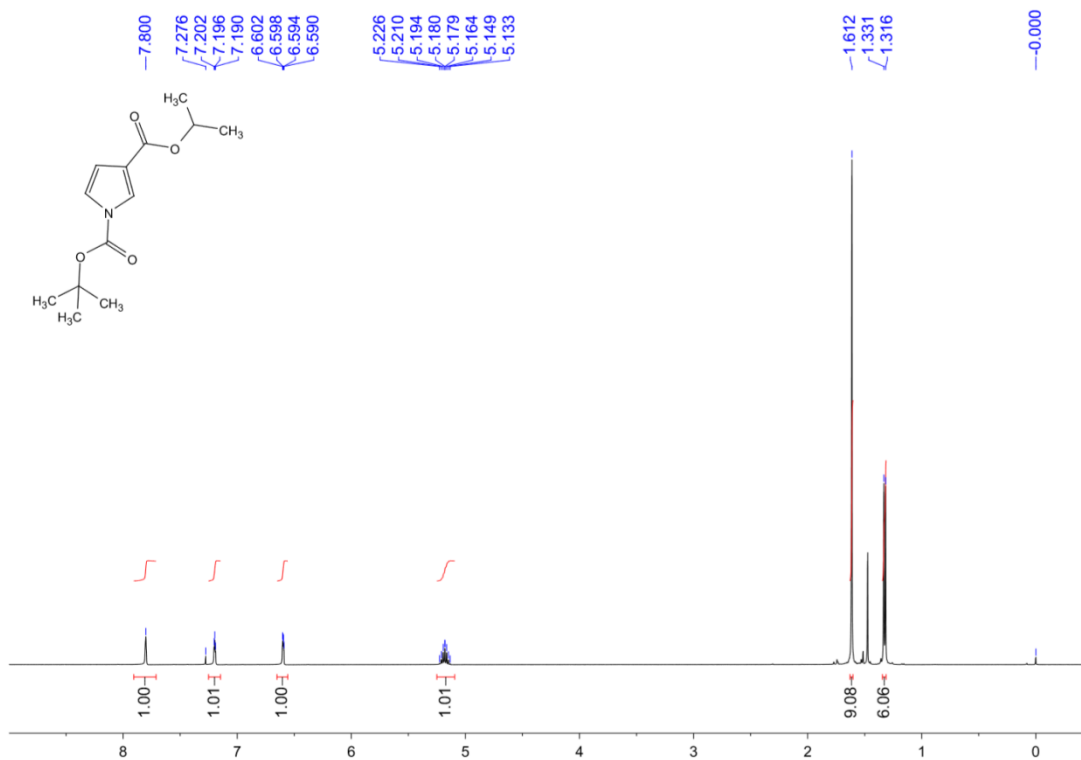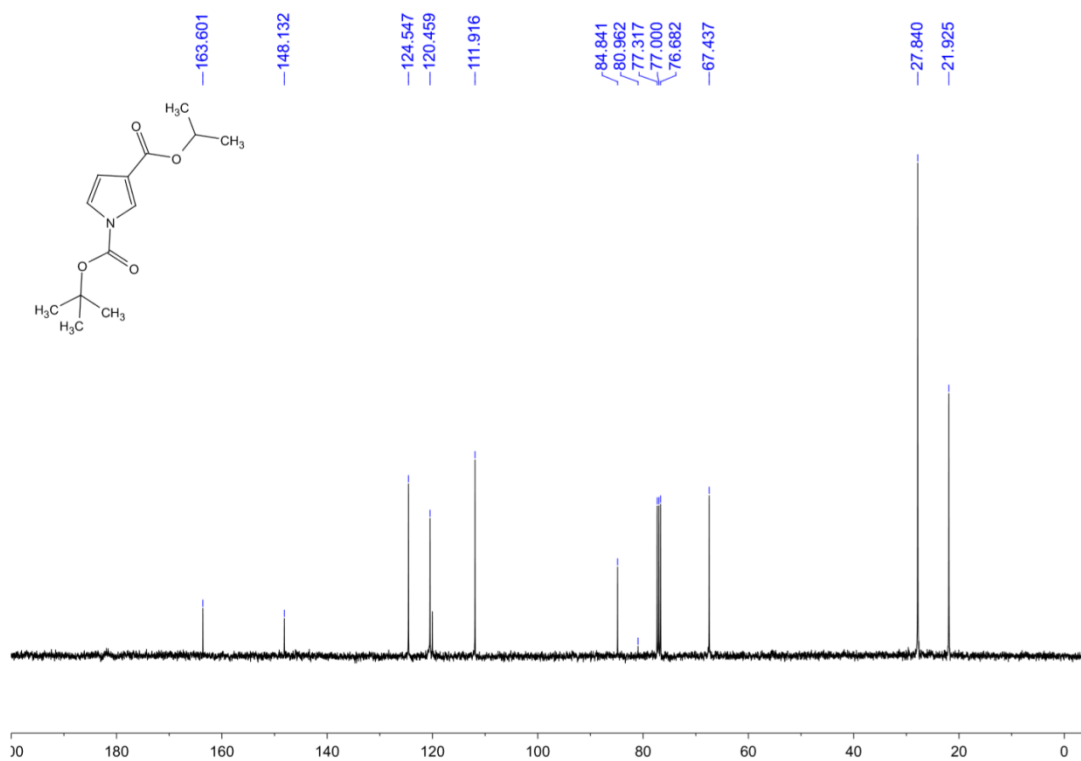

# Compound S2

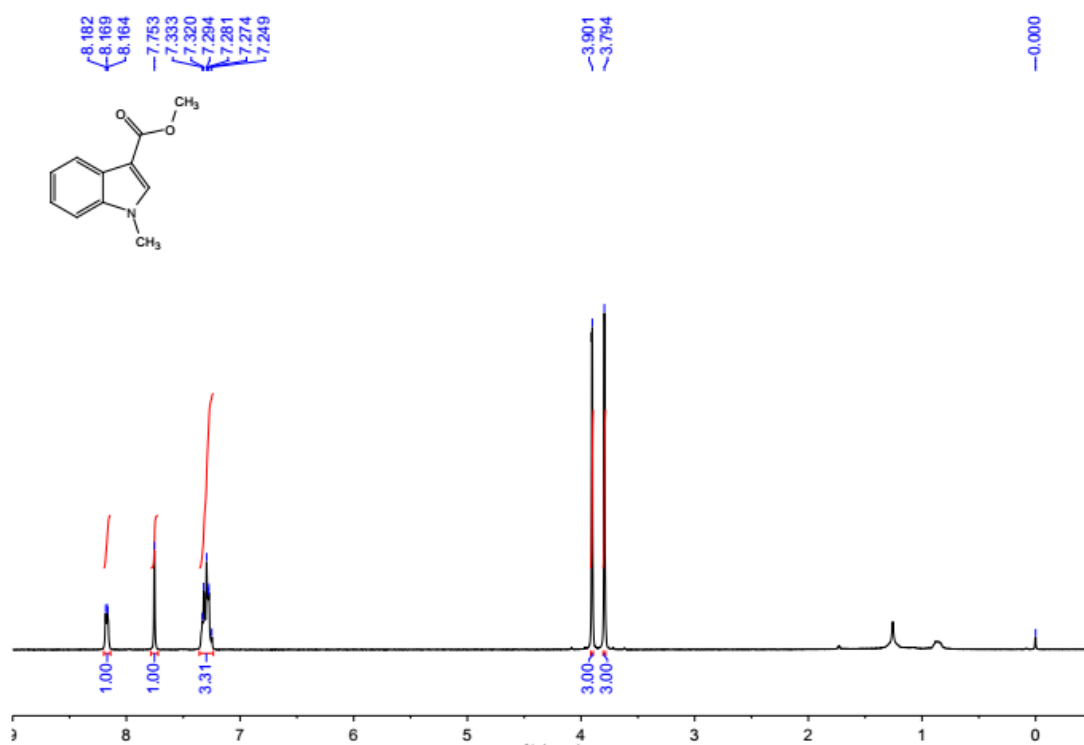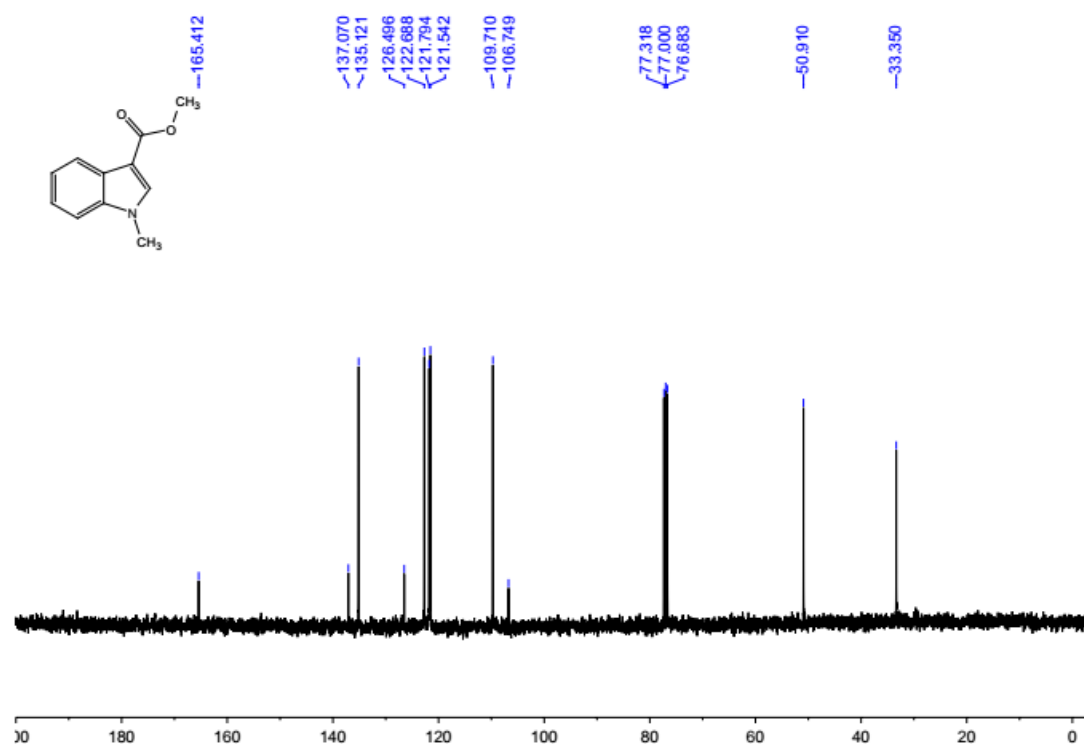

# Compound S3

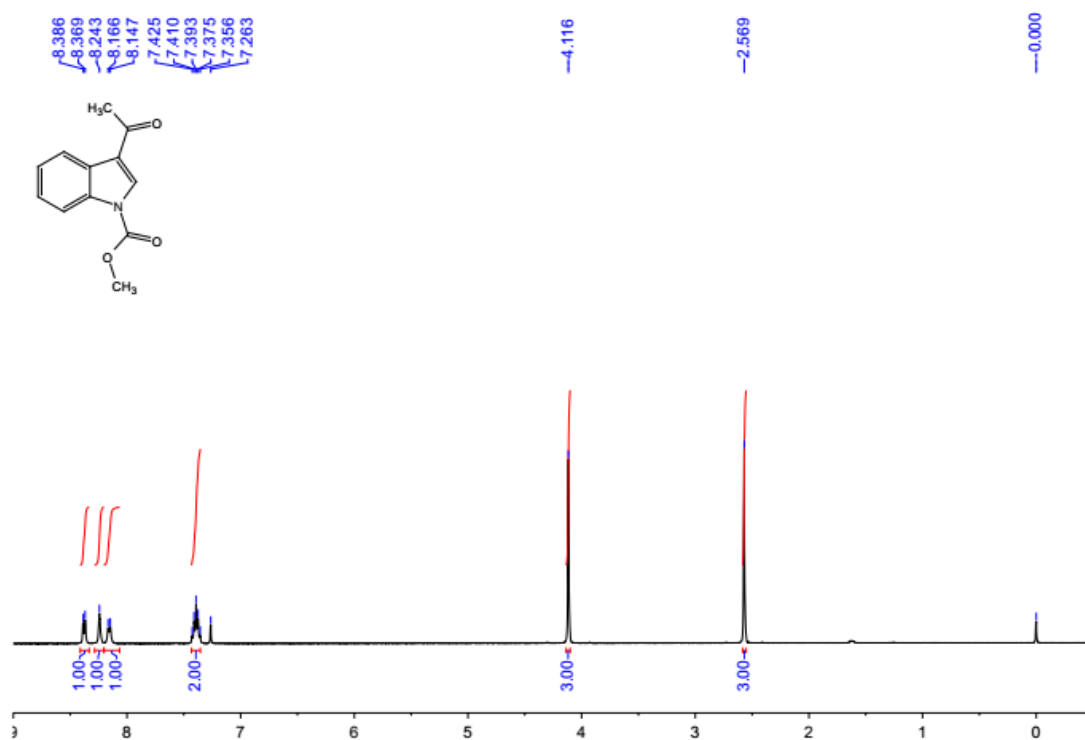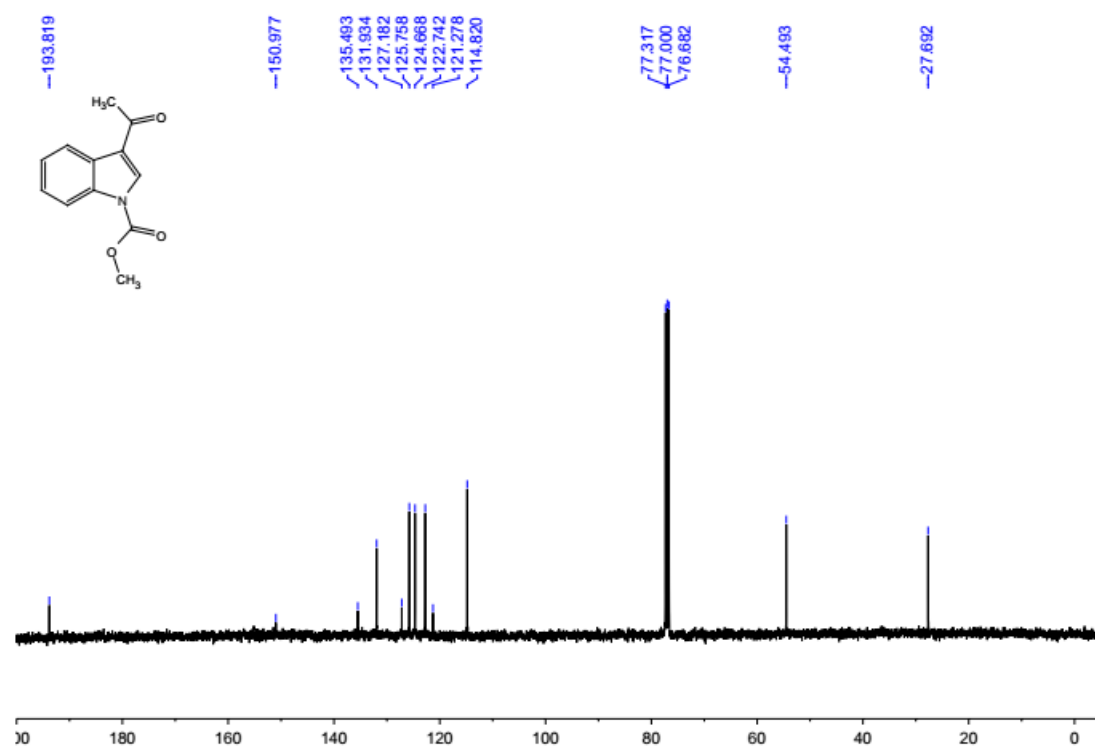



# Compound S4

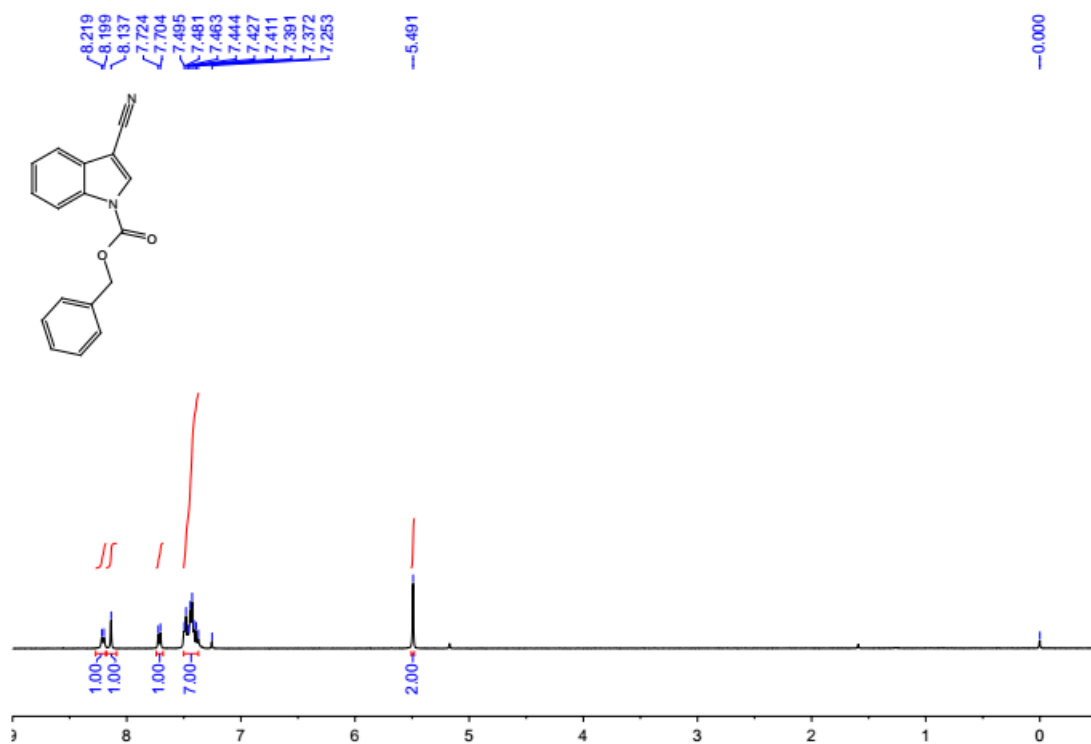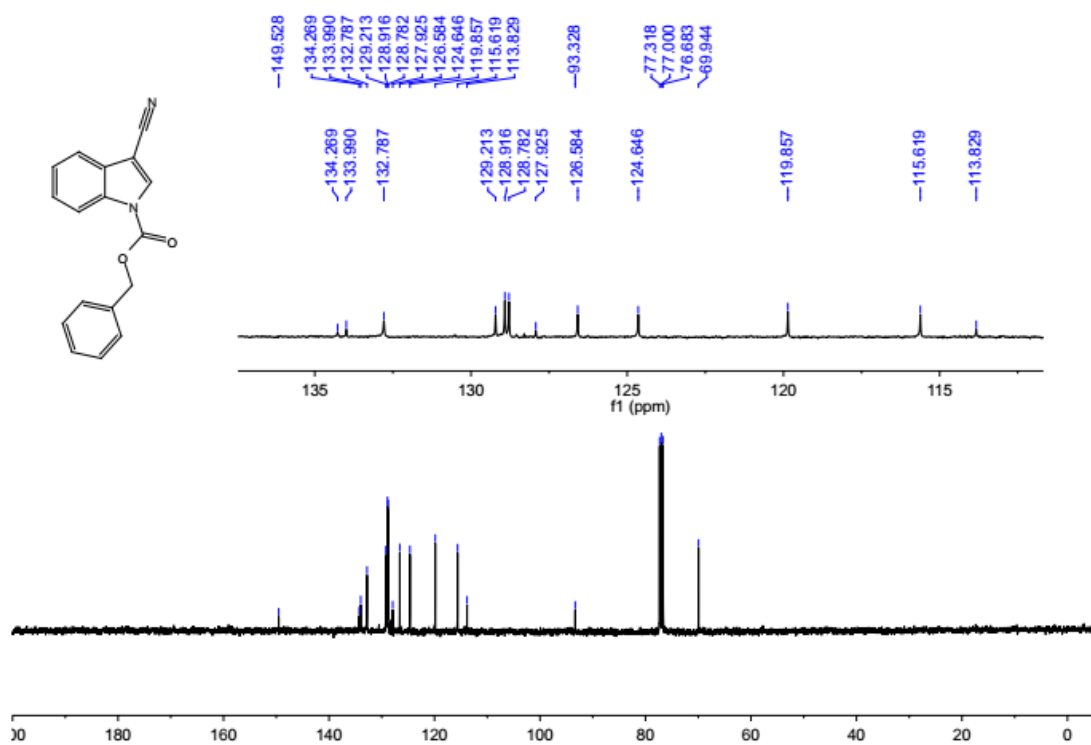

# Compound S5

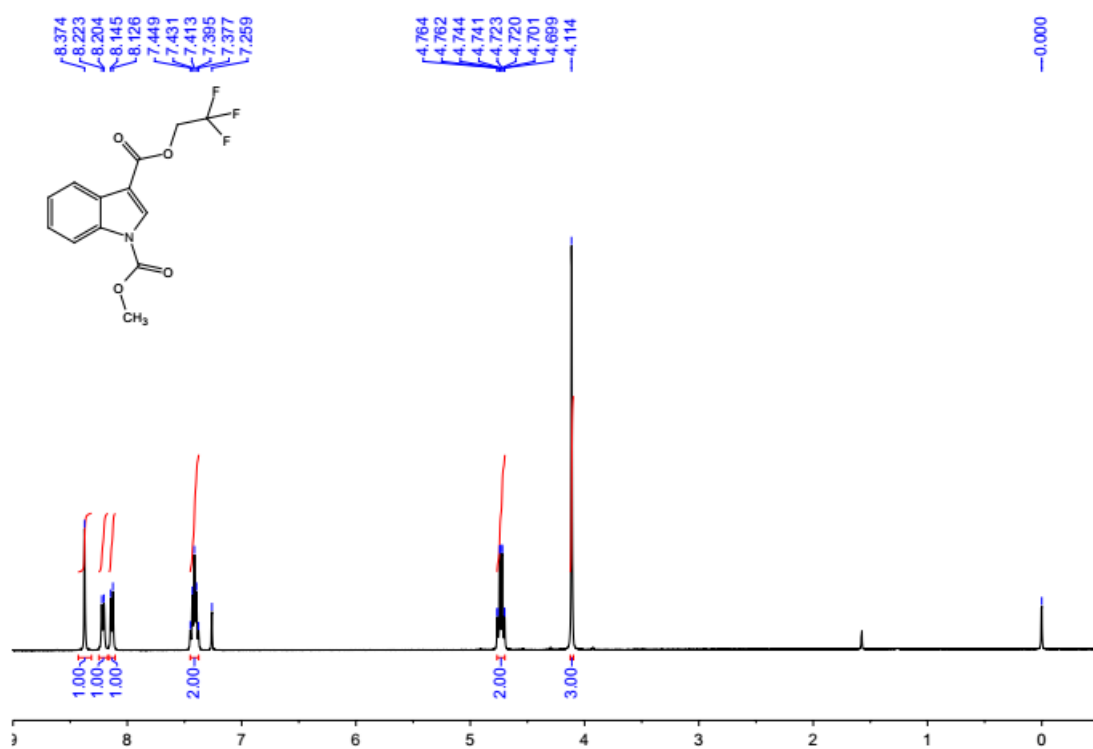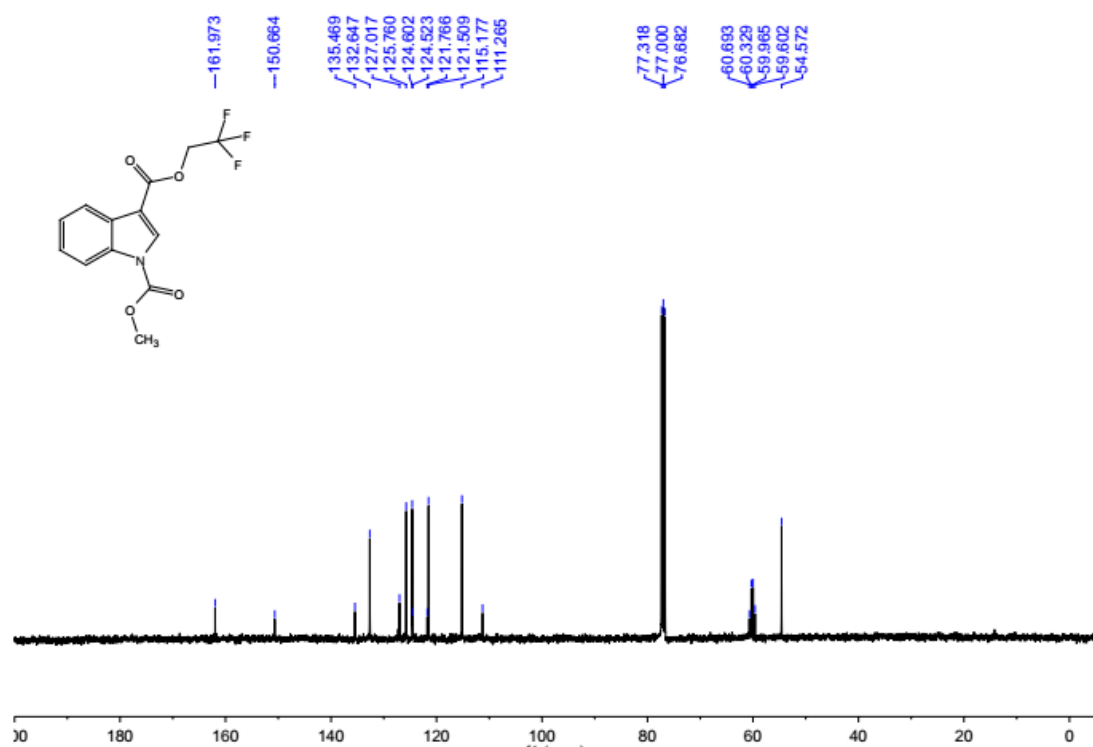

# Compound S6

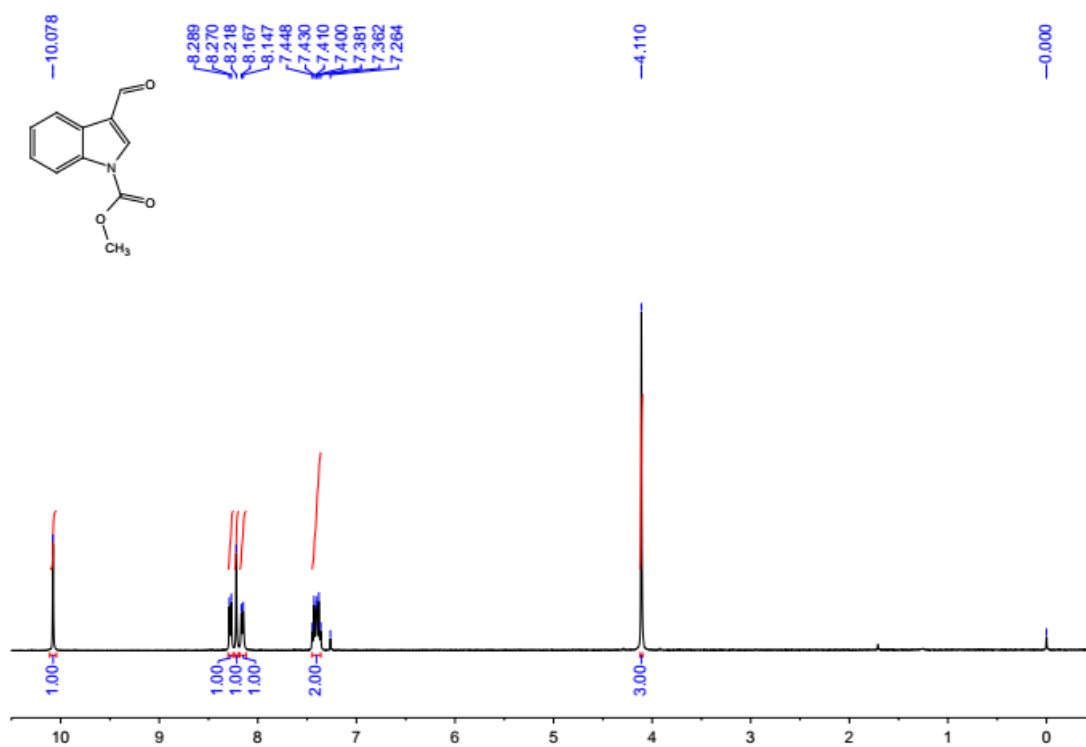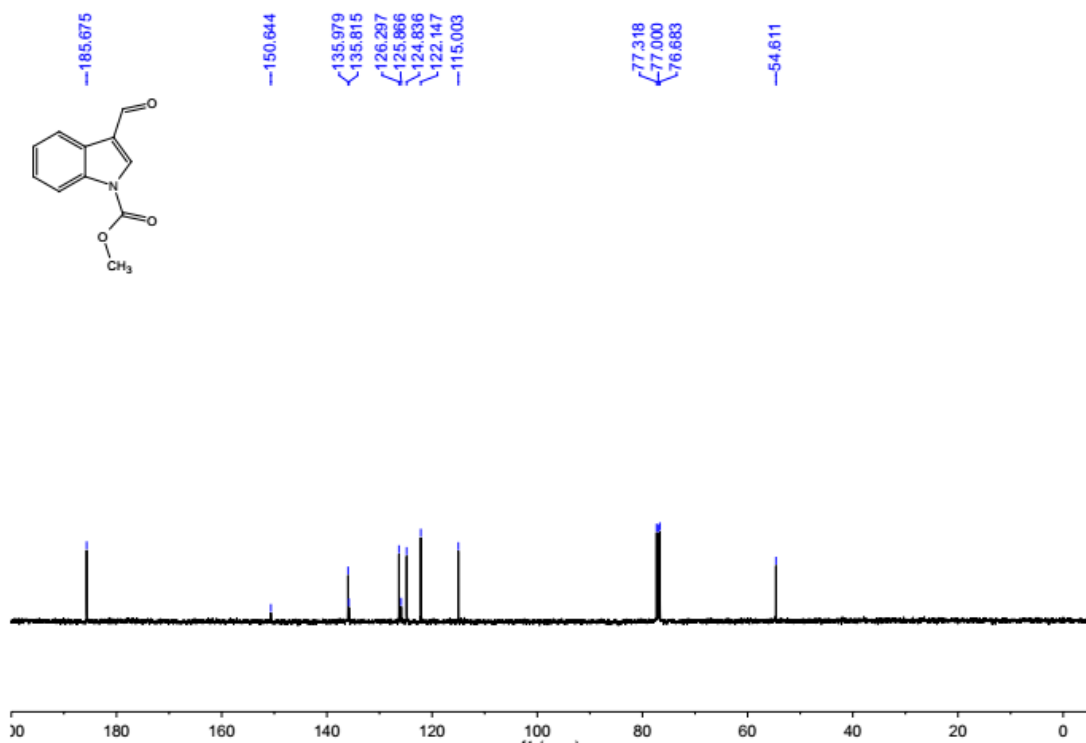

# Compound S7

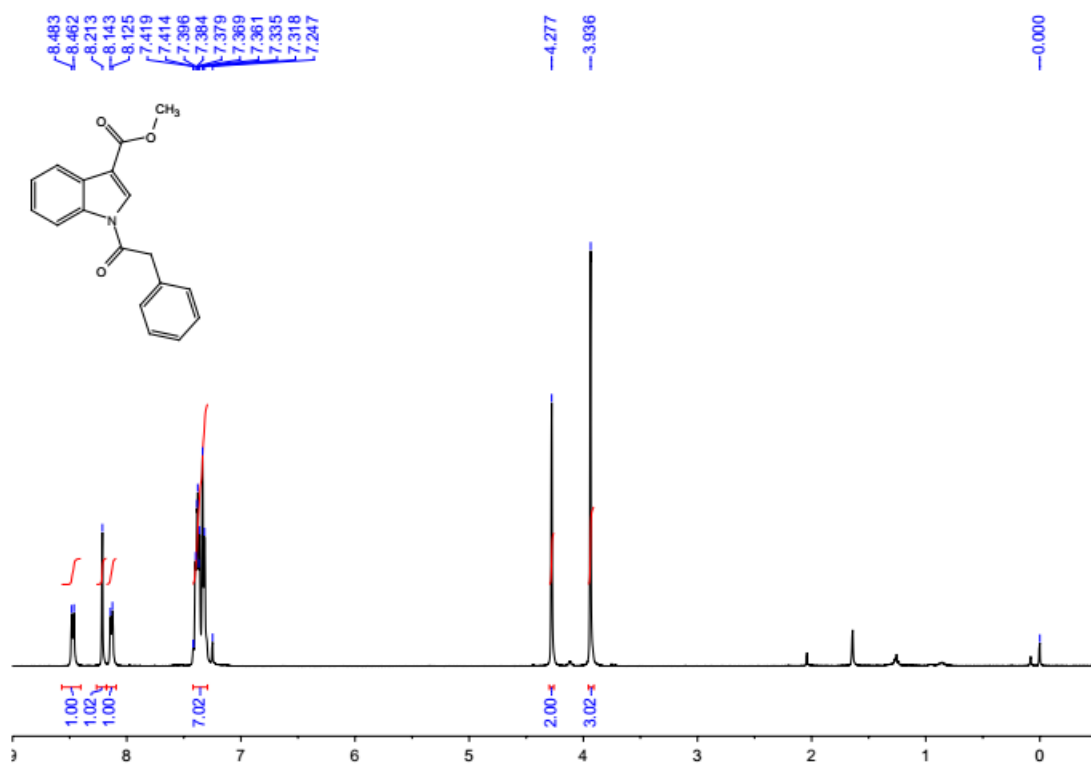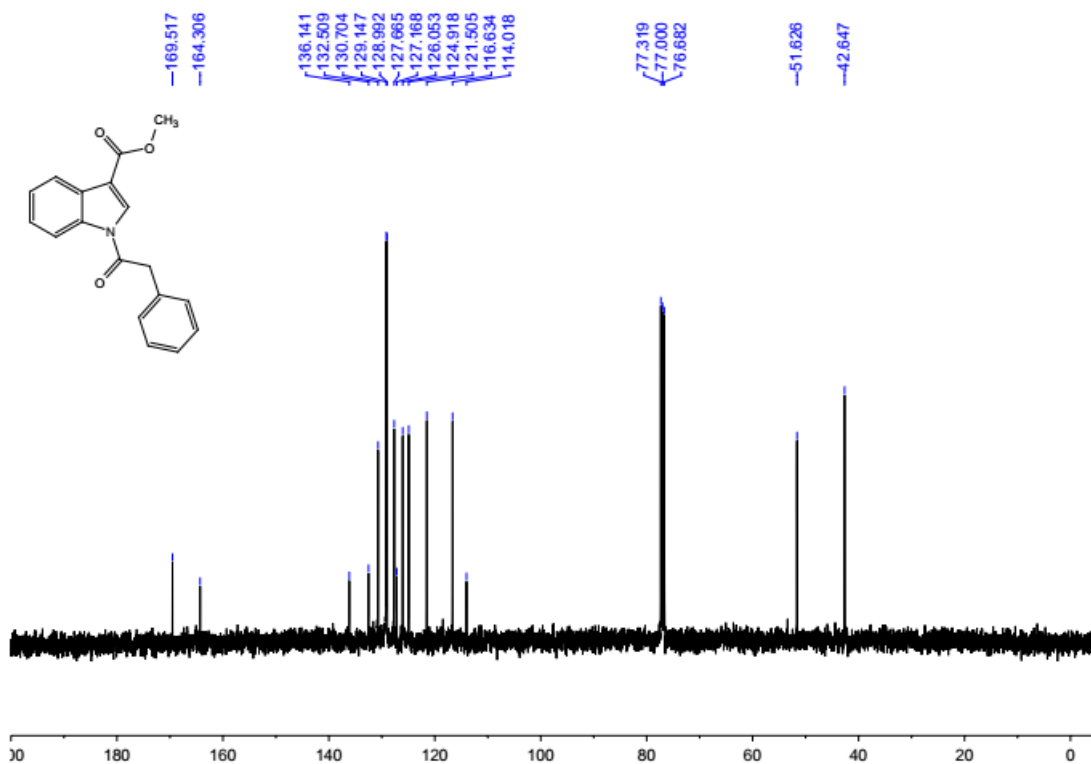

# Compound S8

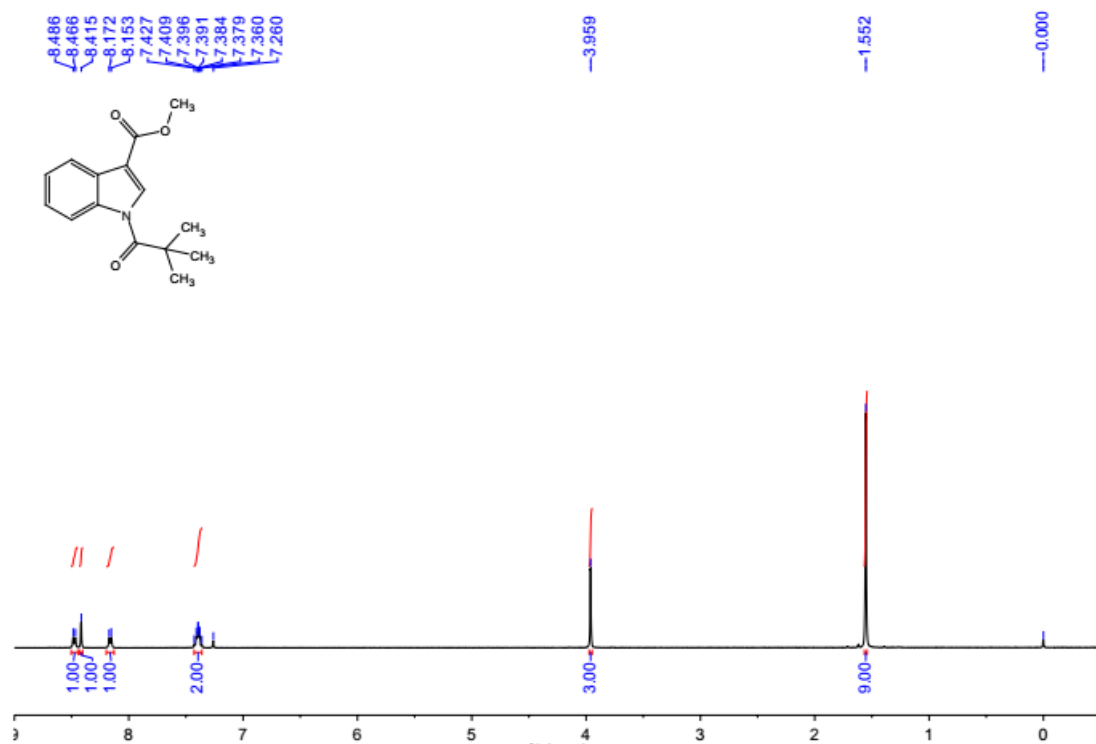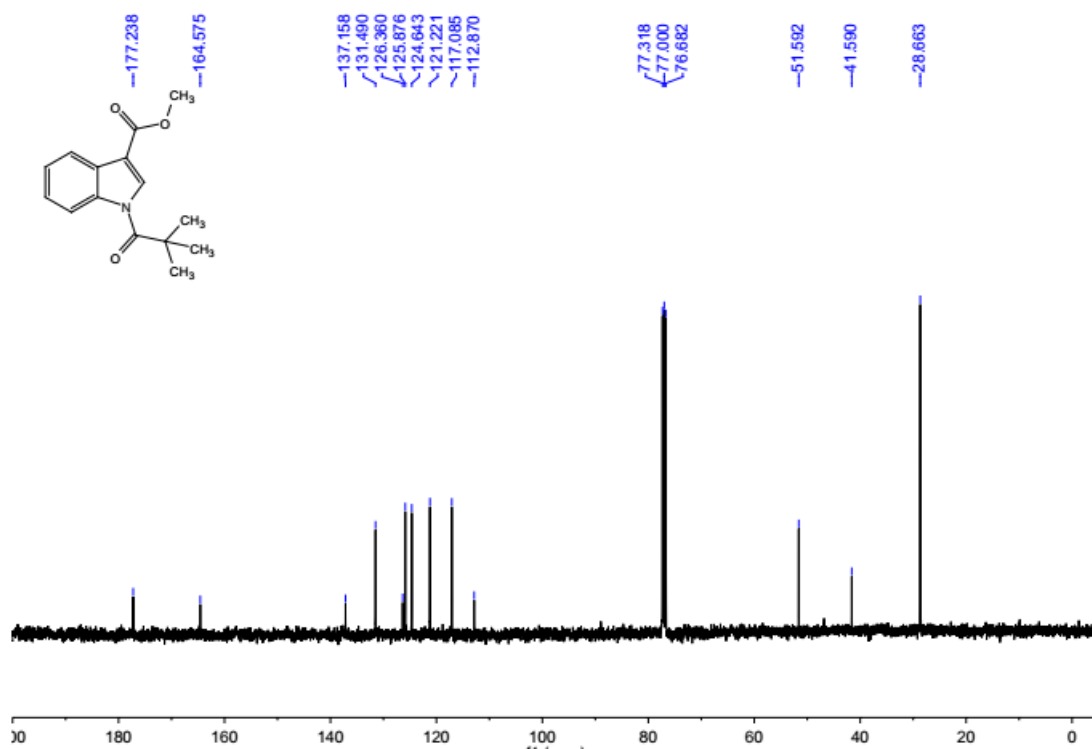

# Compound S9

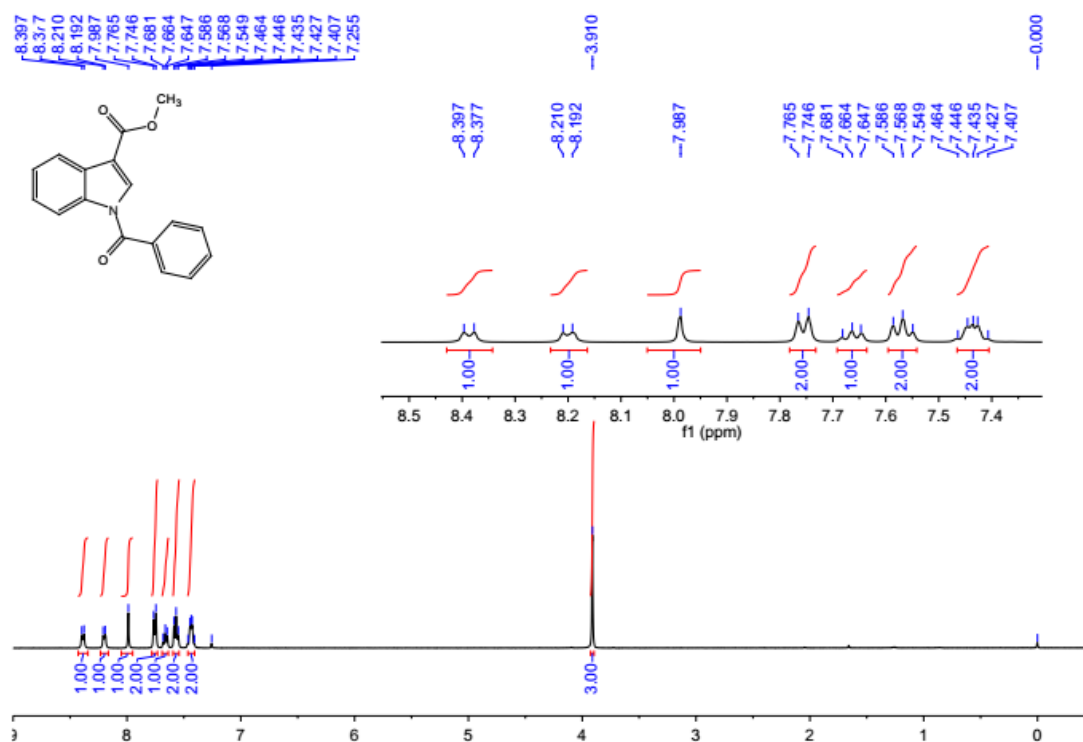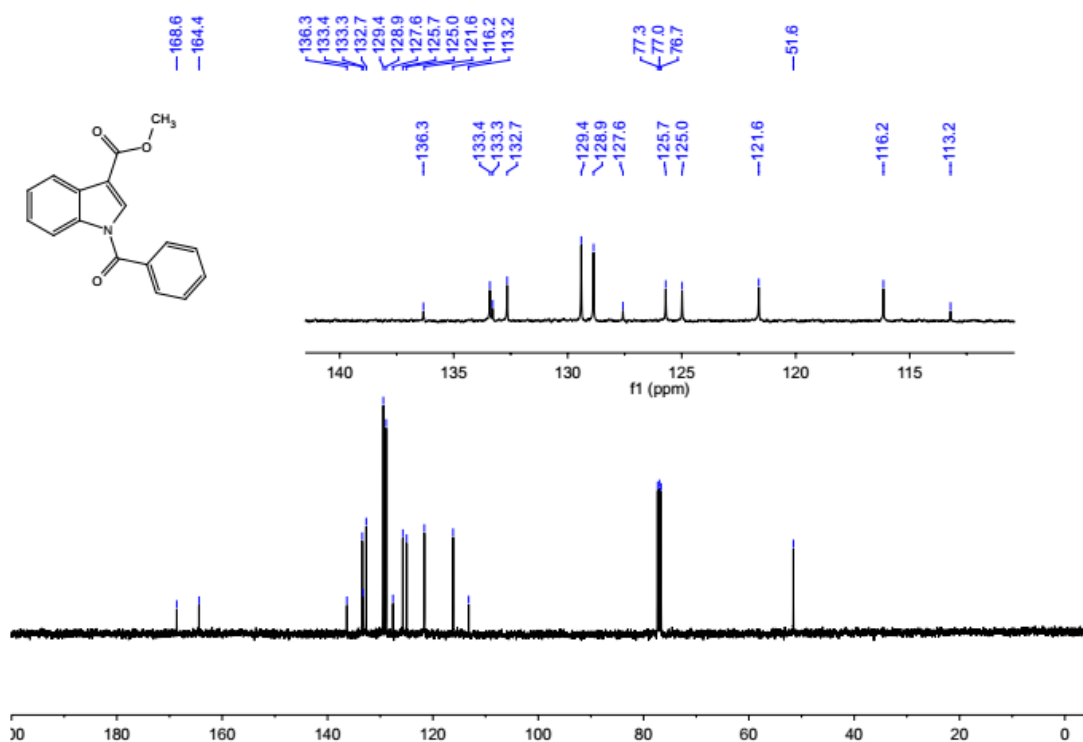

# Compound S10

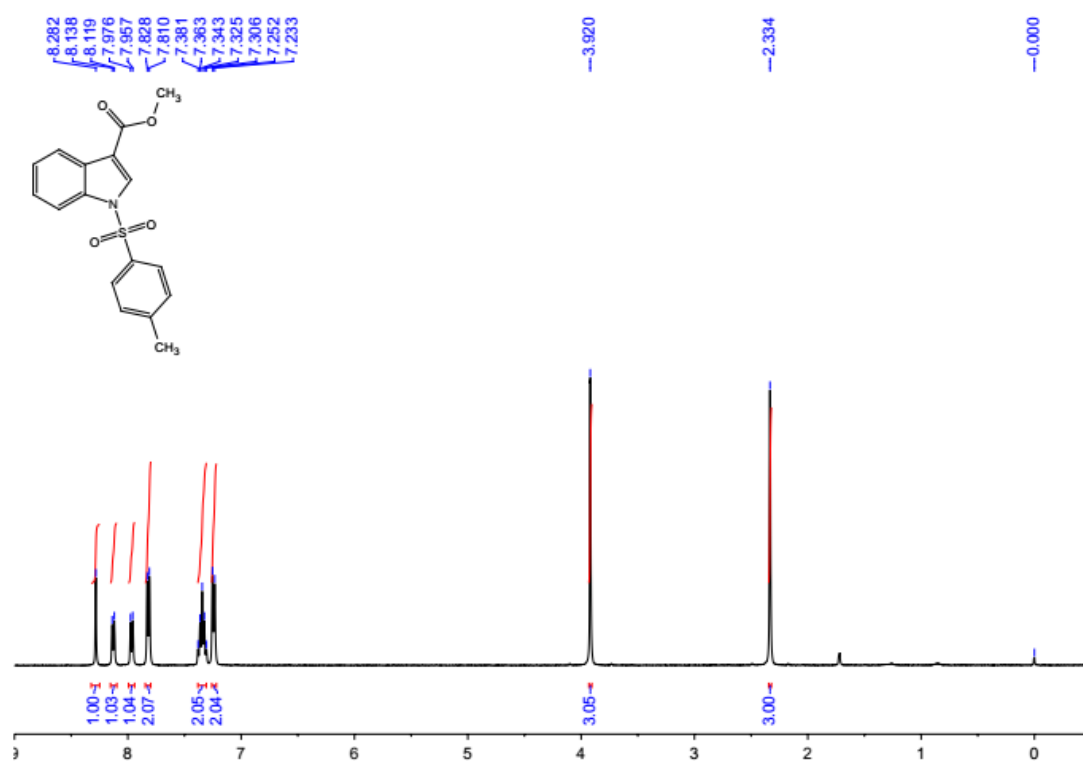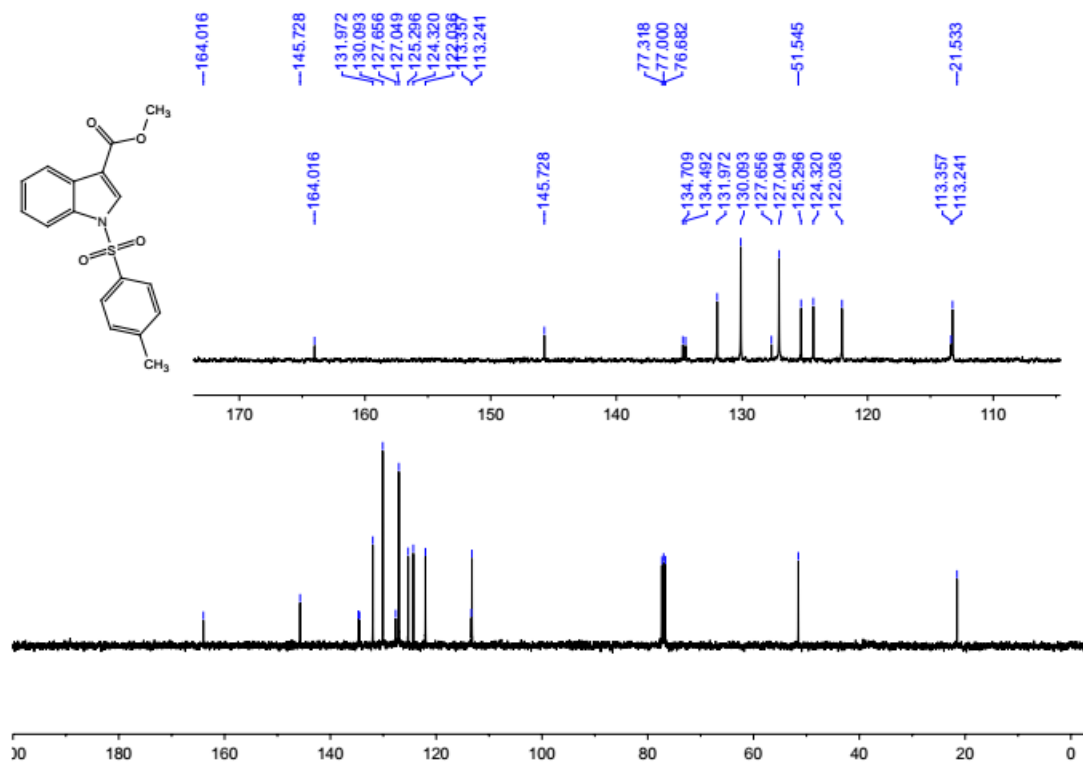

# Compound 2a

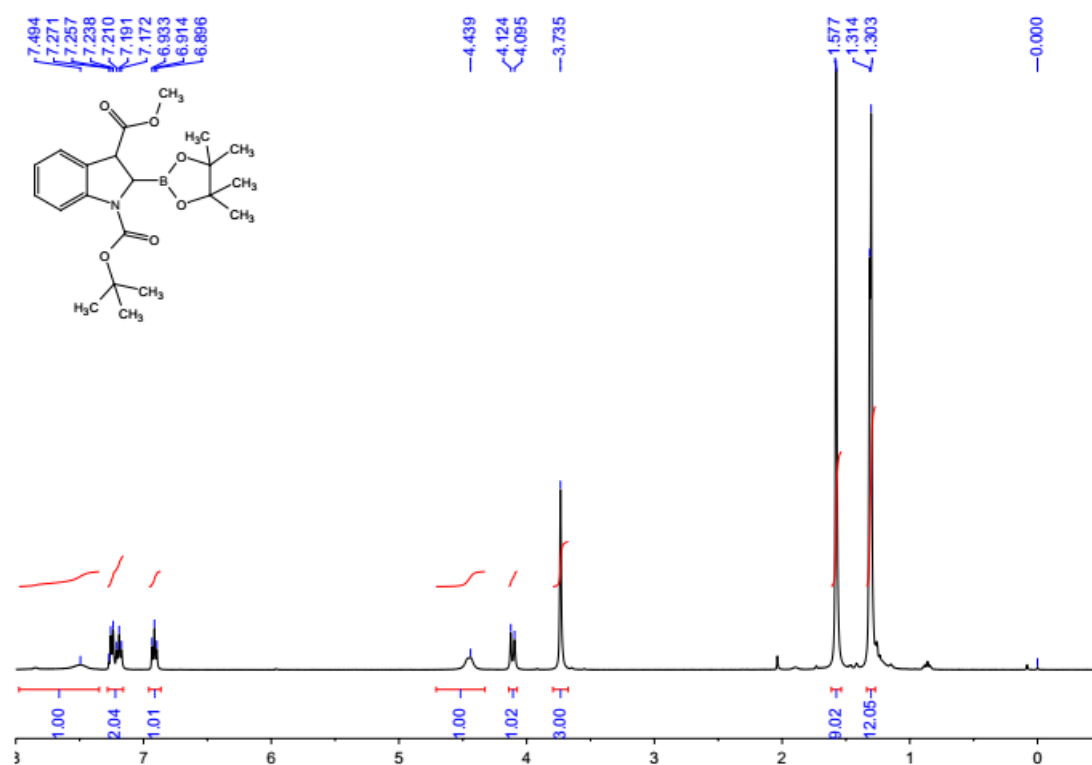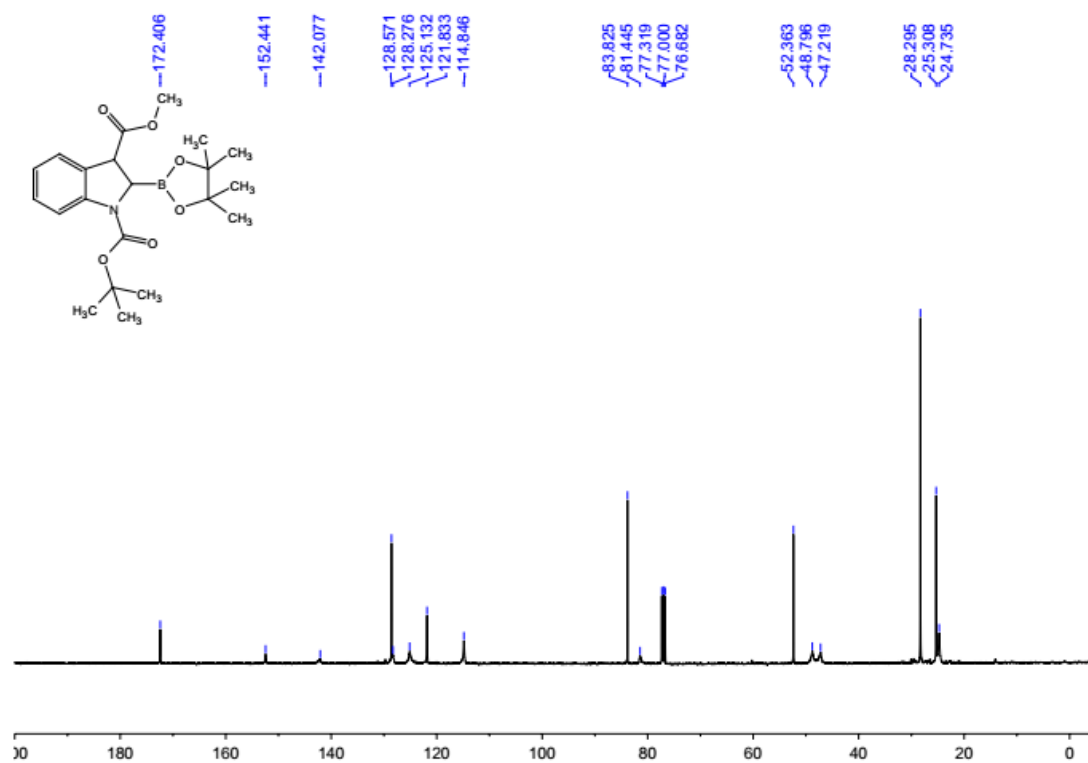



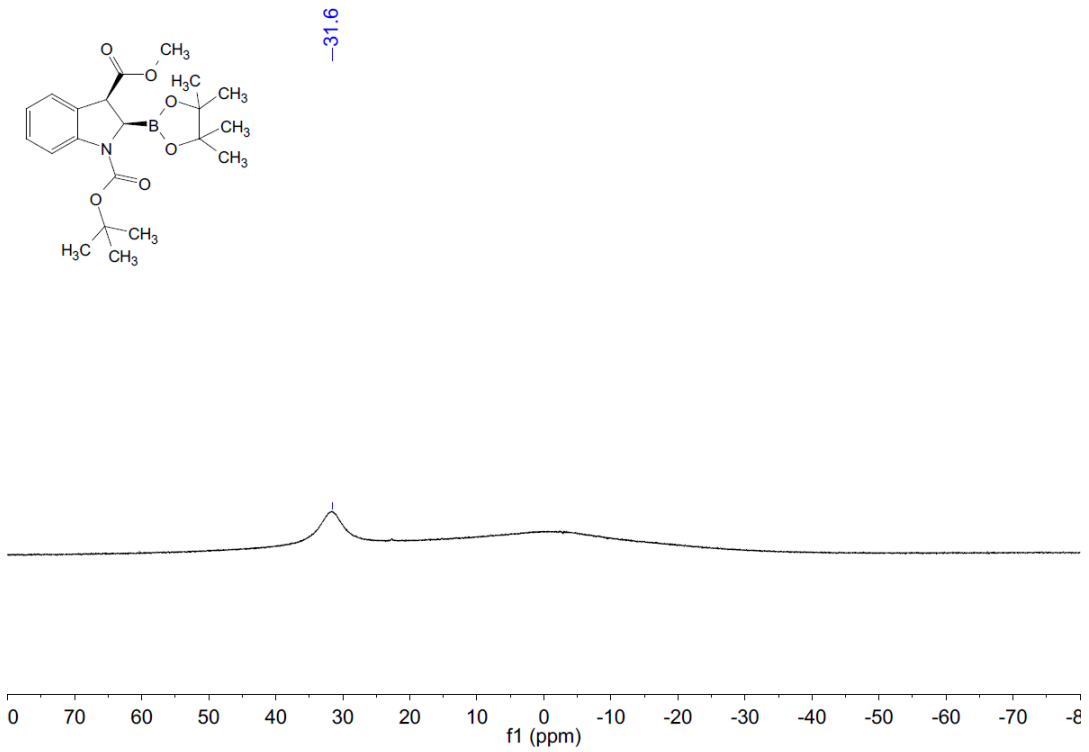

### Compound 2b

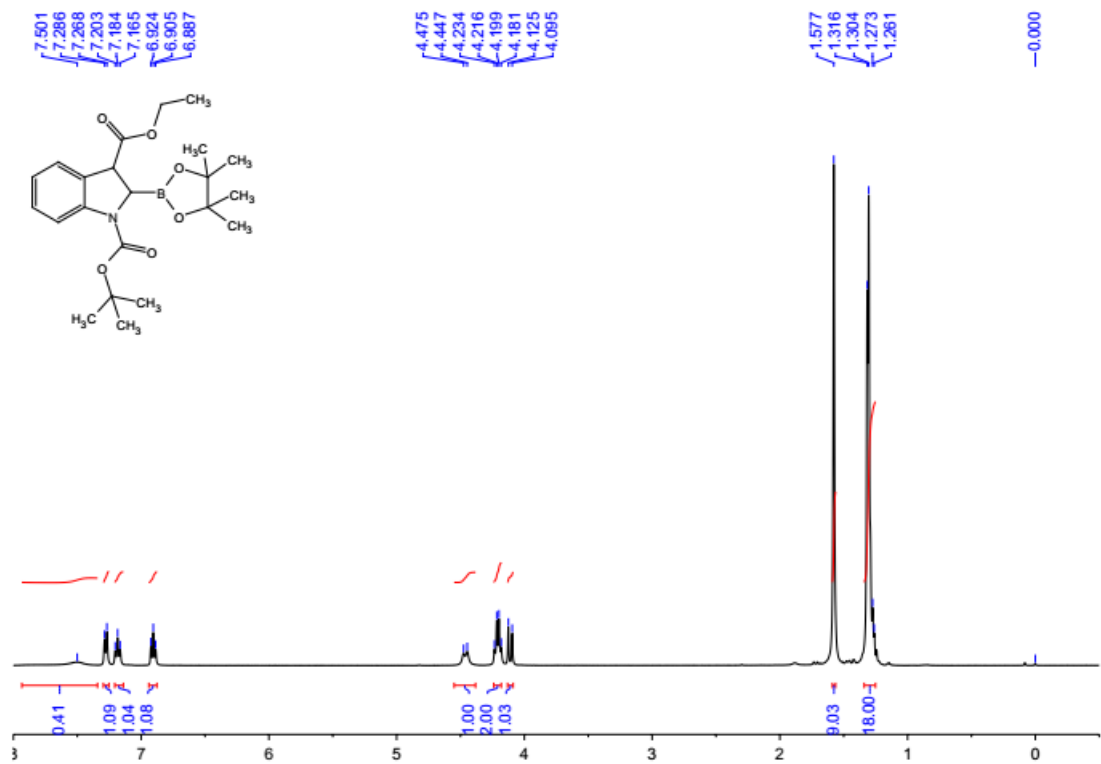

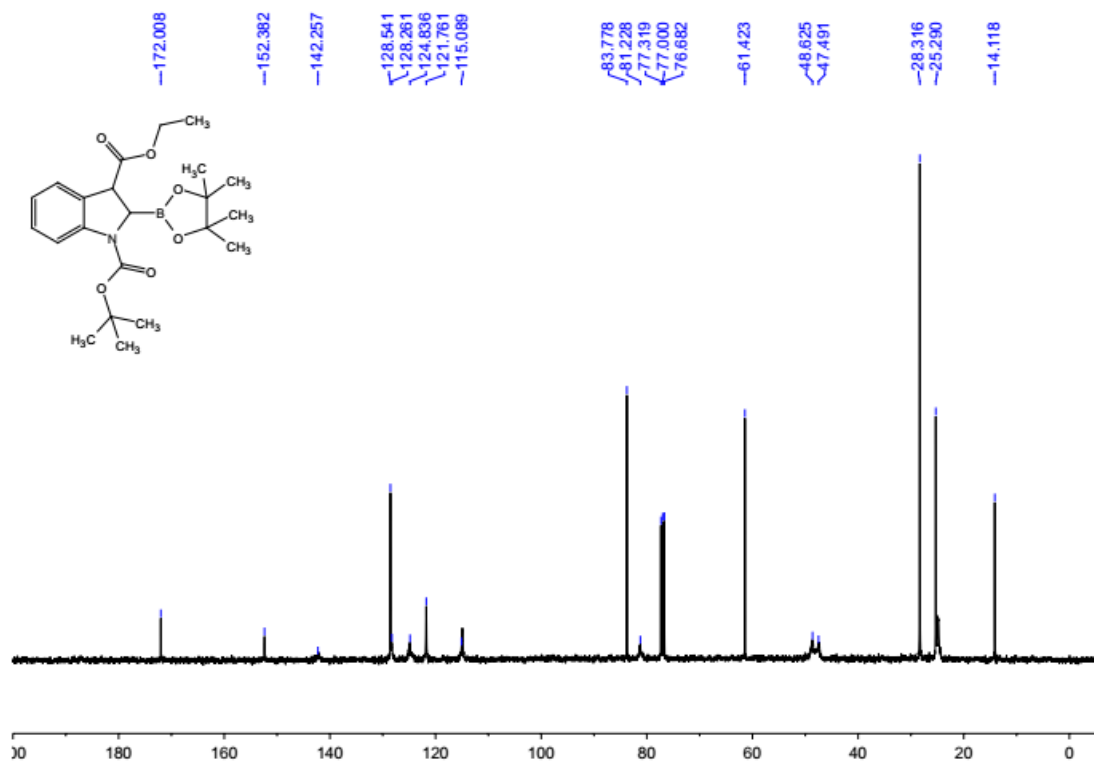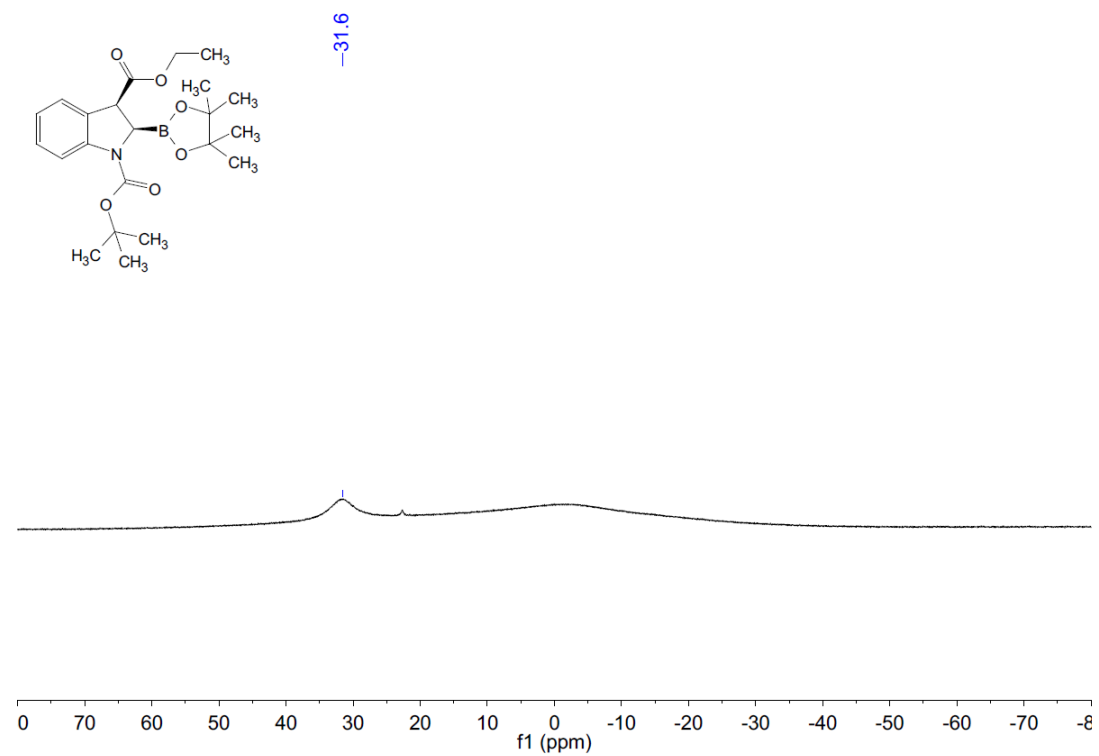

# Compound 2c

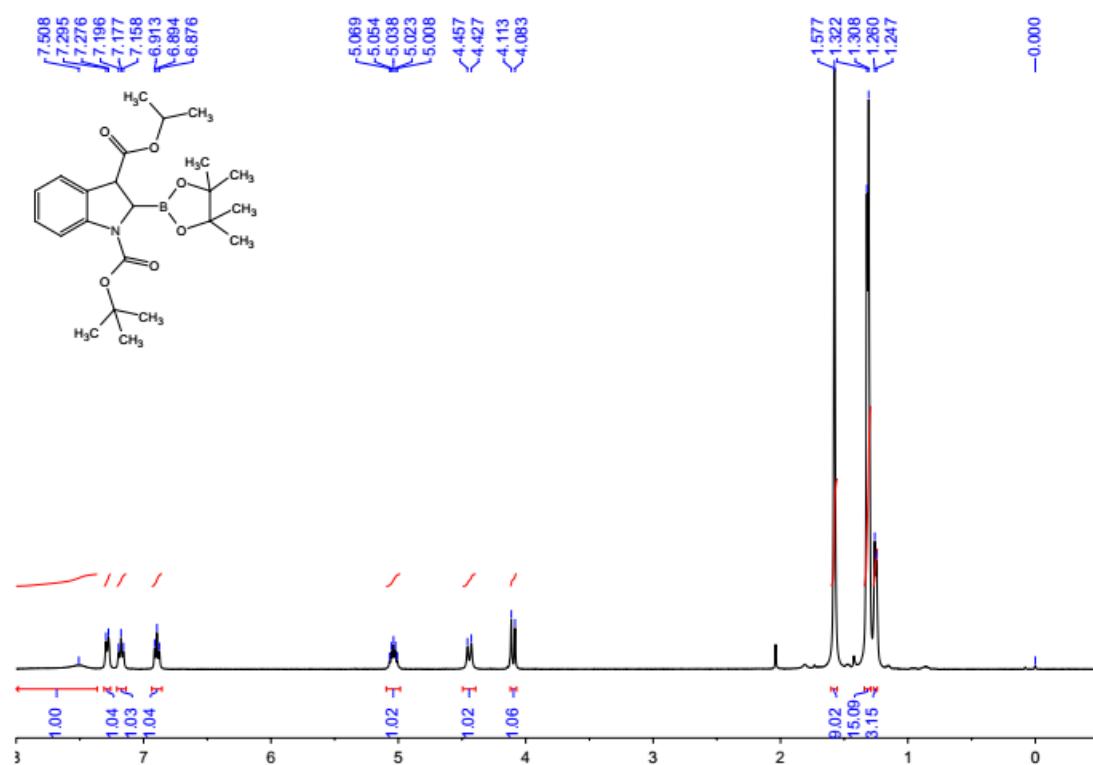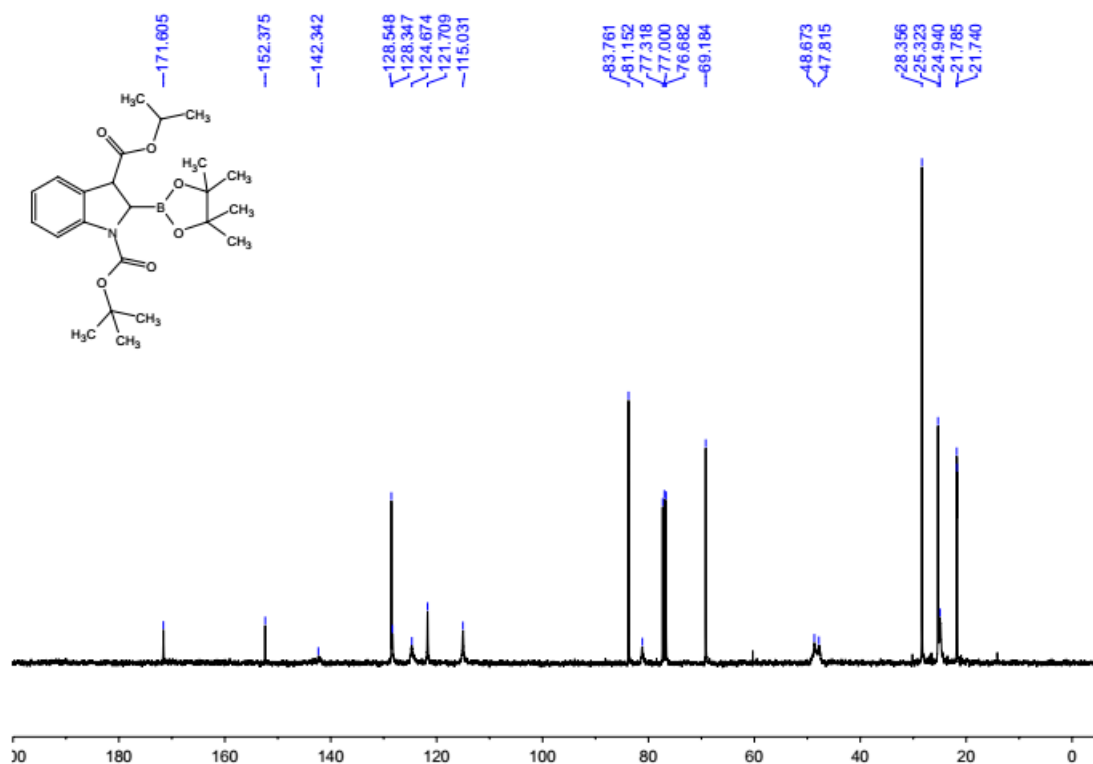

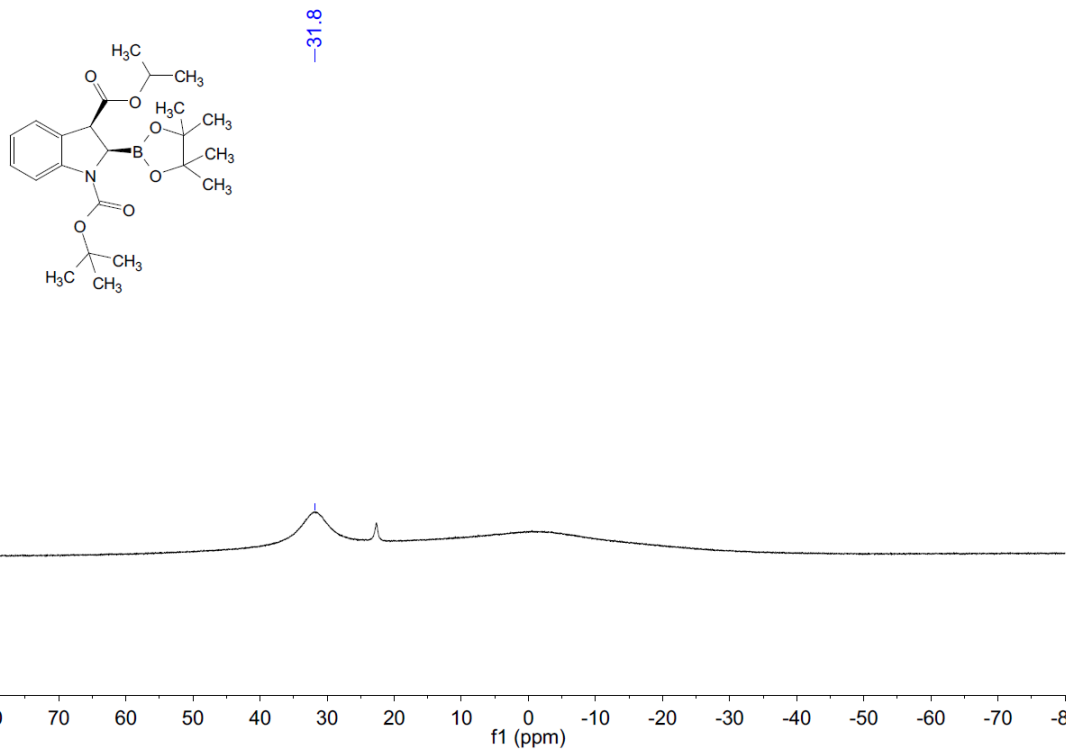

### Compound 2d

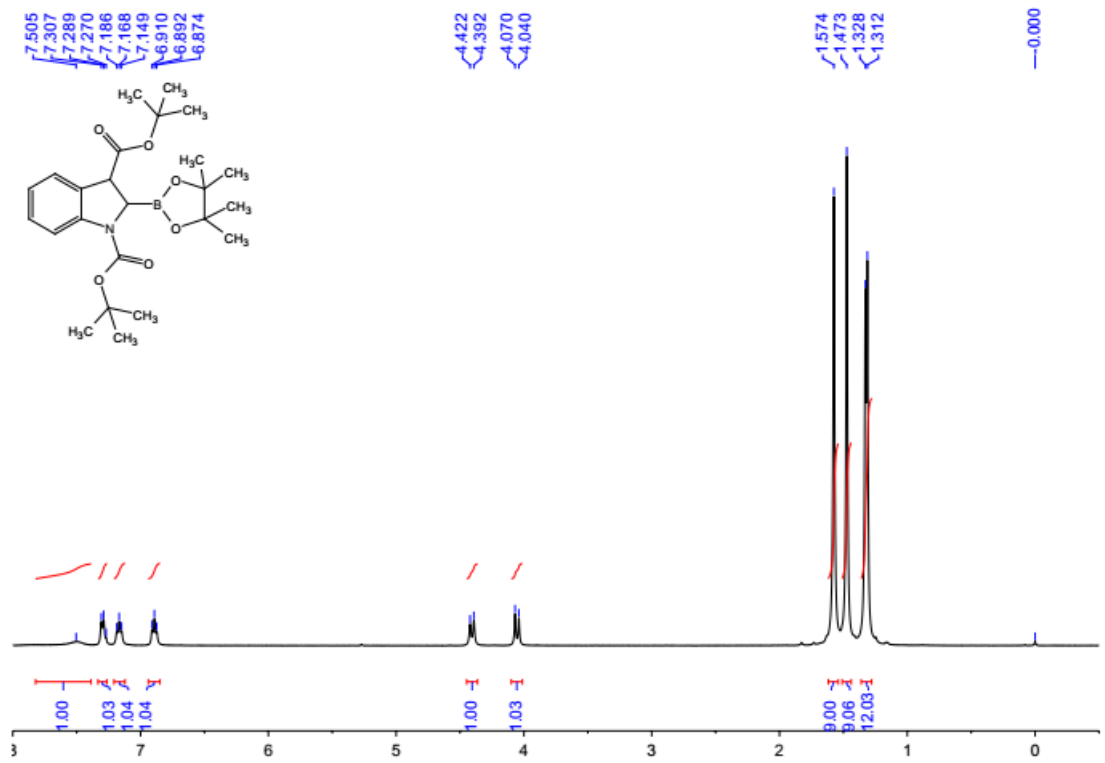

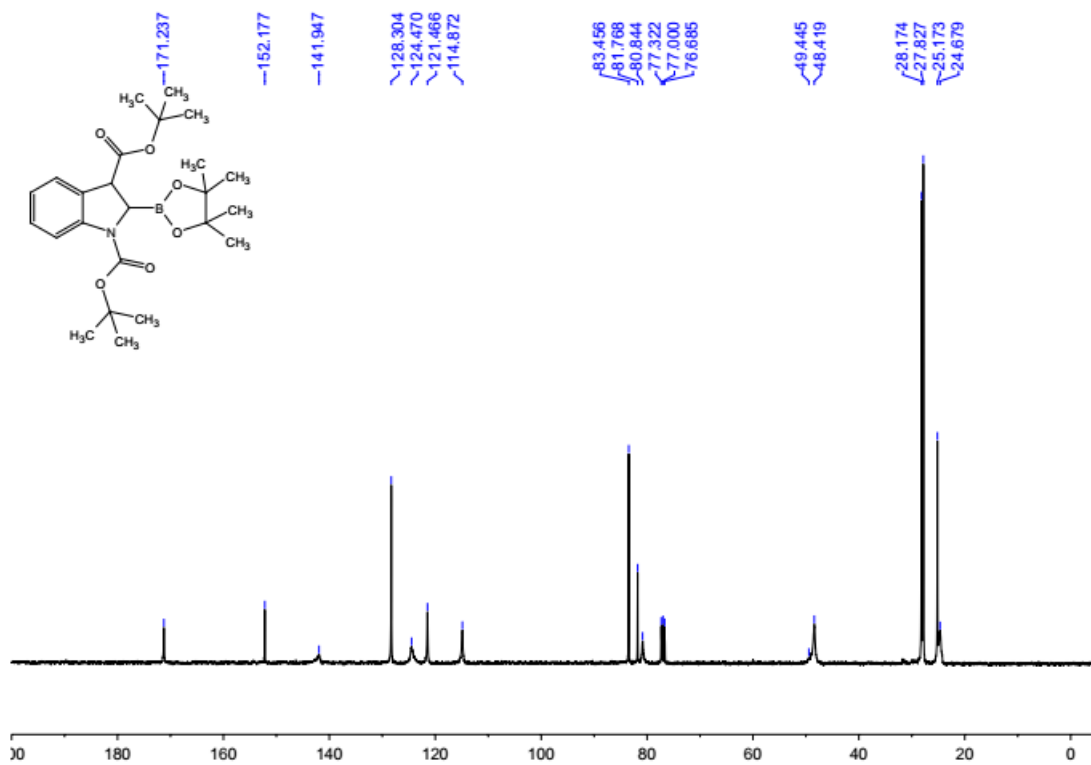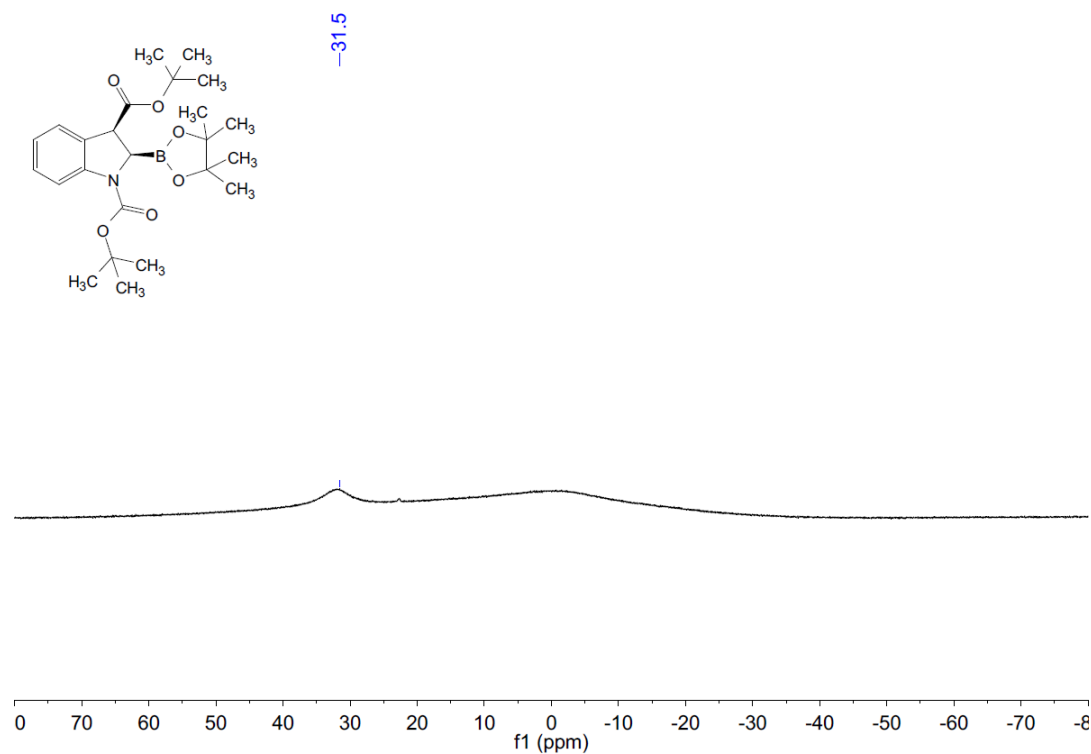

# Compound 2e

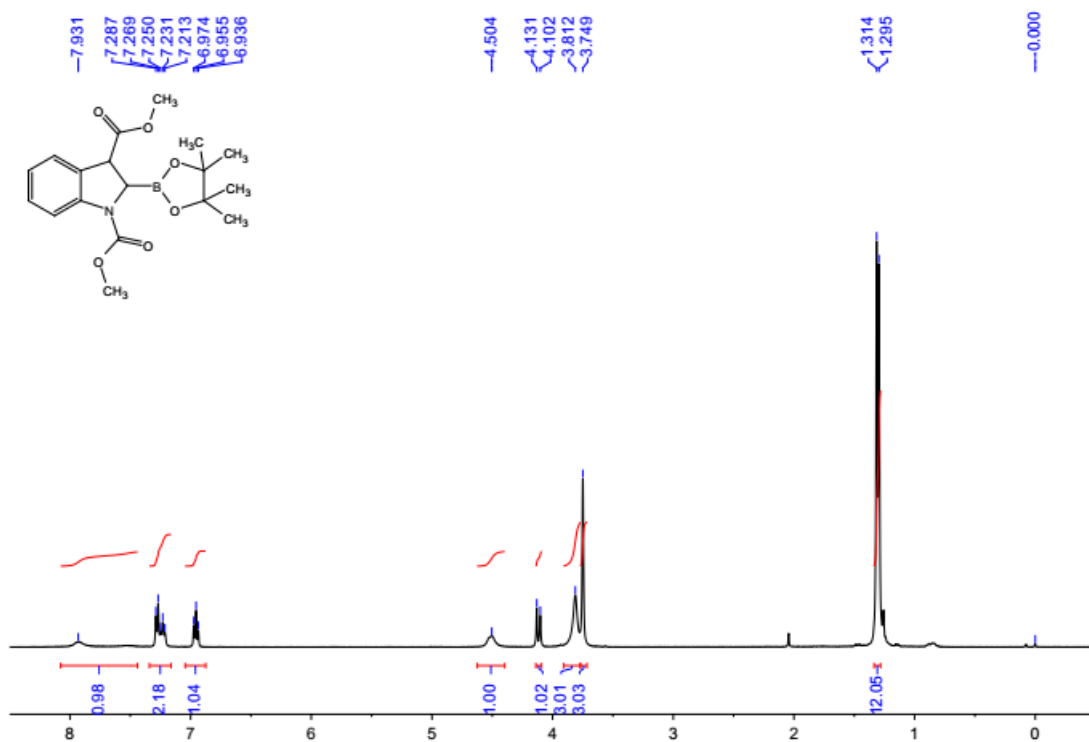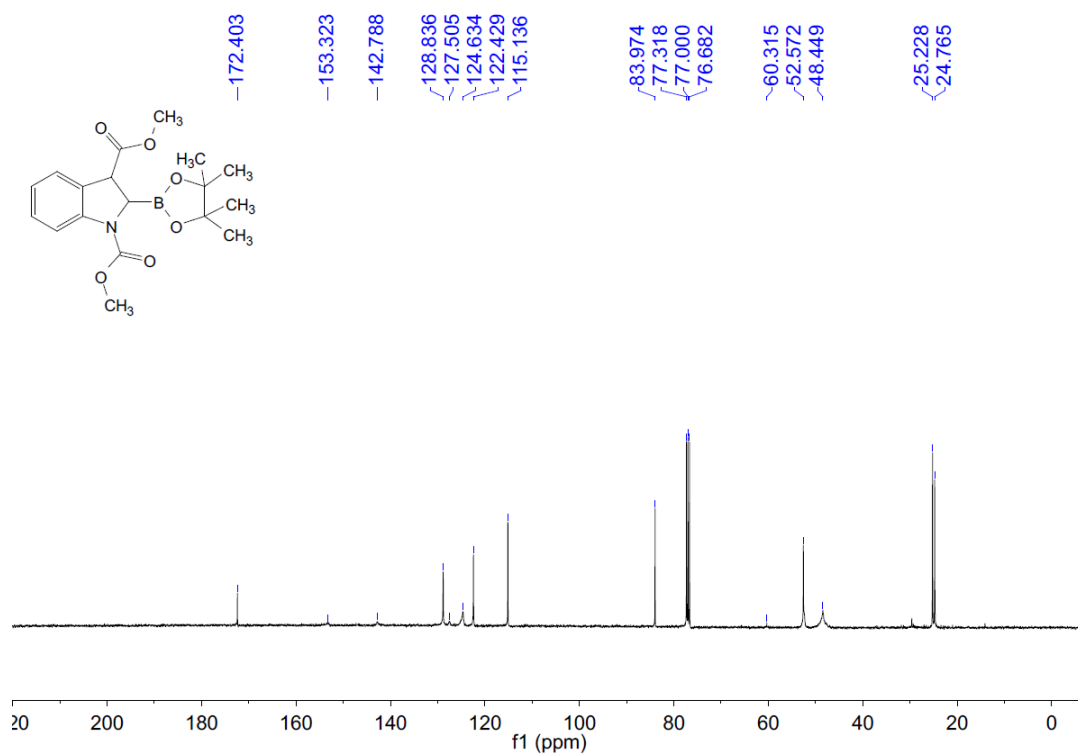

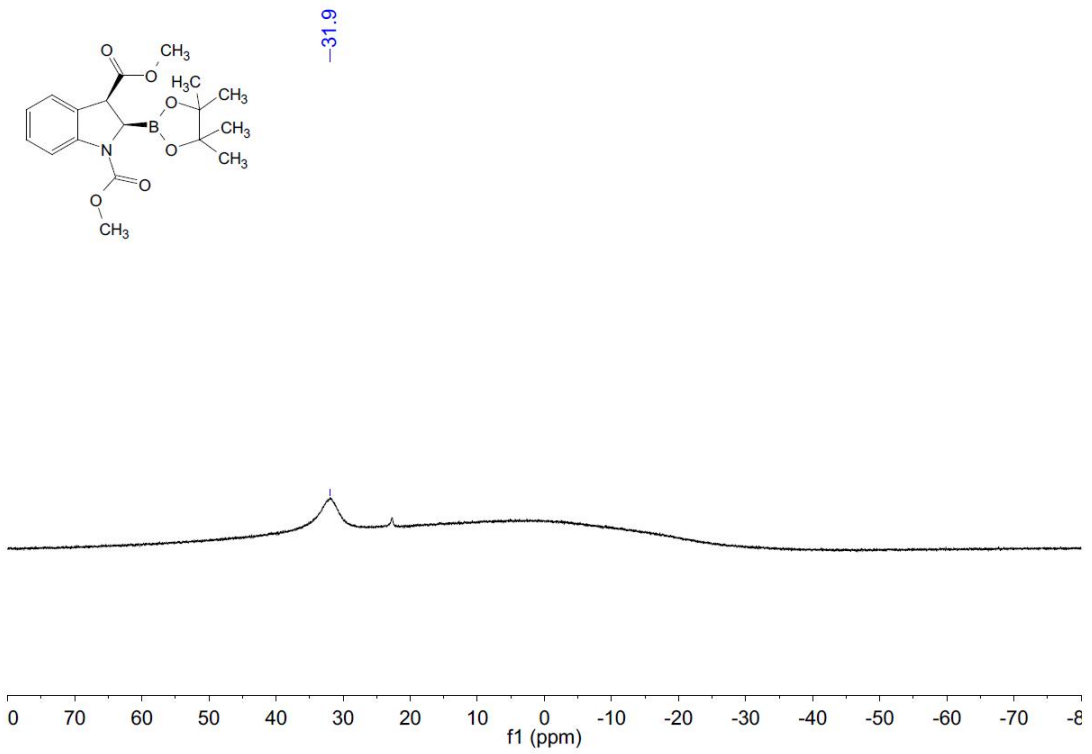

### Compound 2f

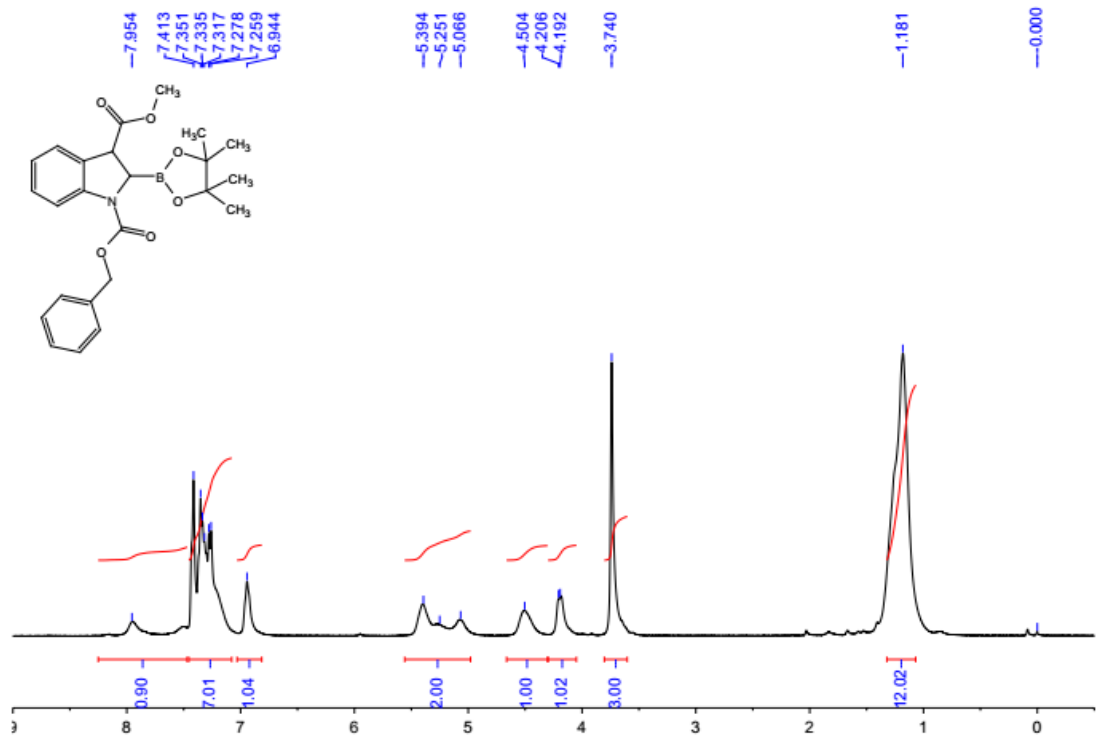

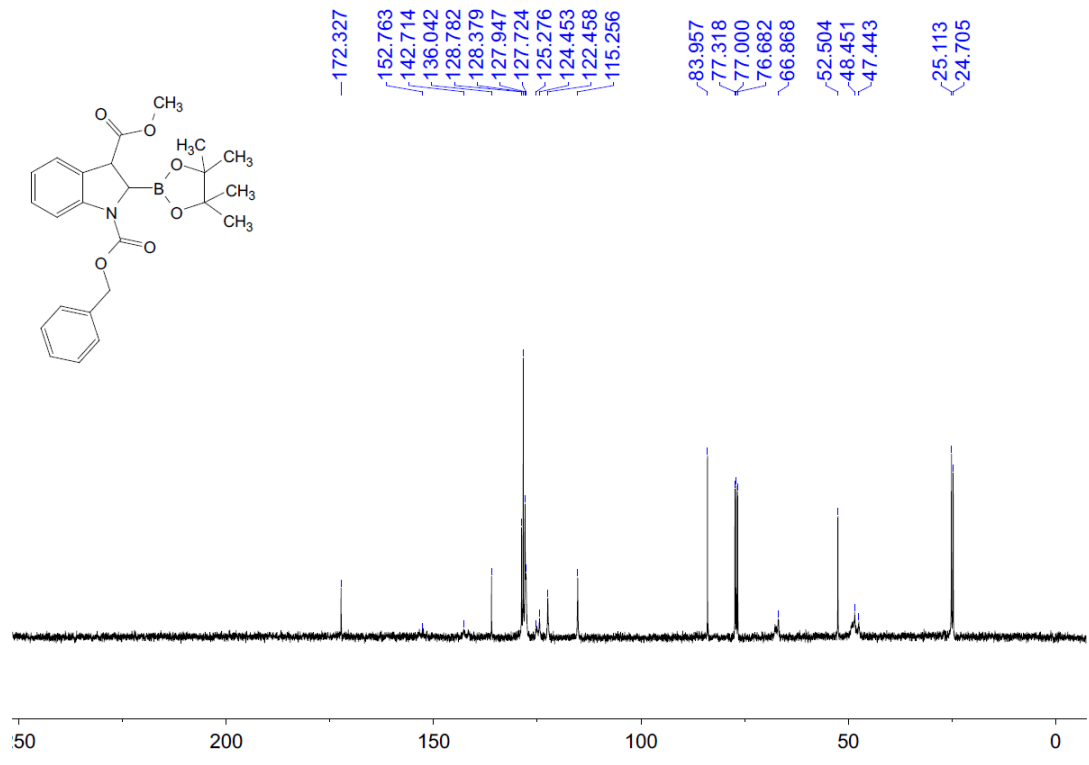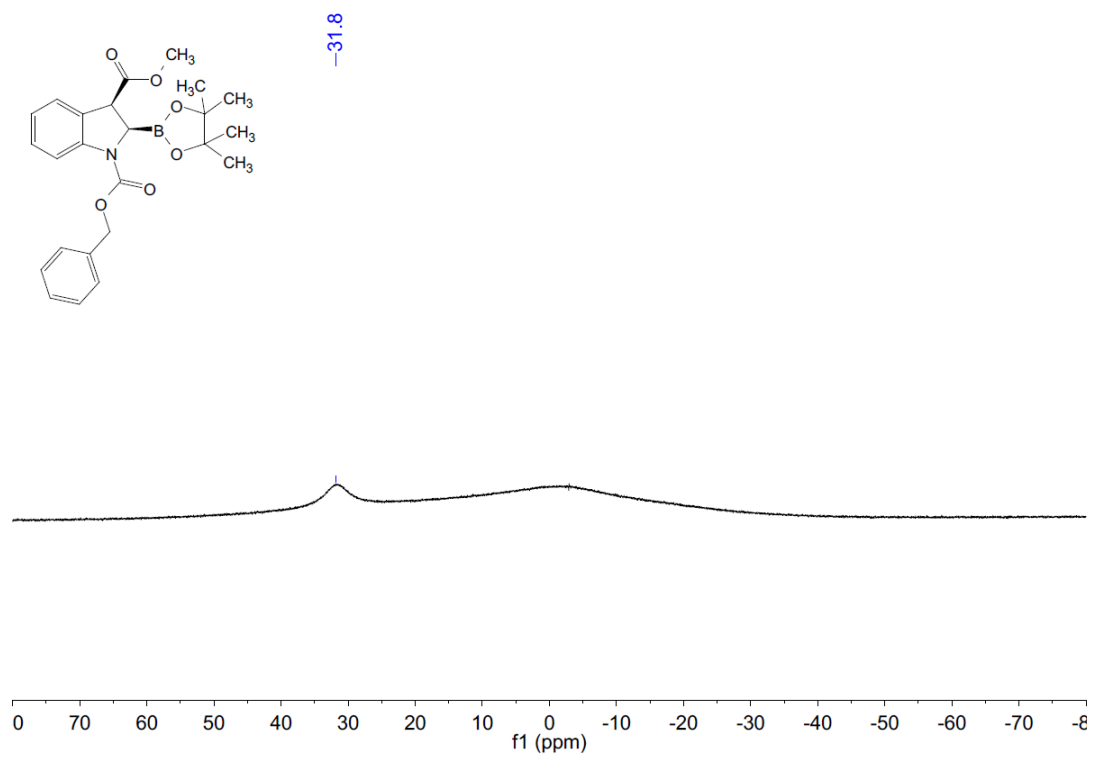



# Compound 2g

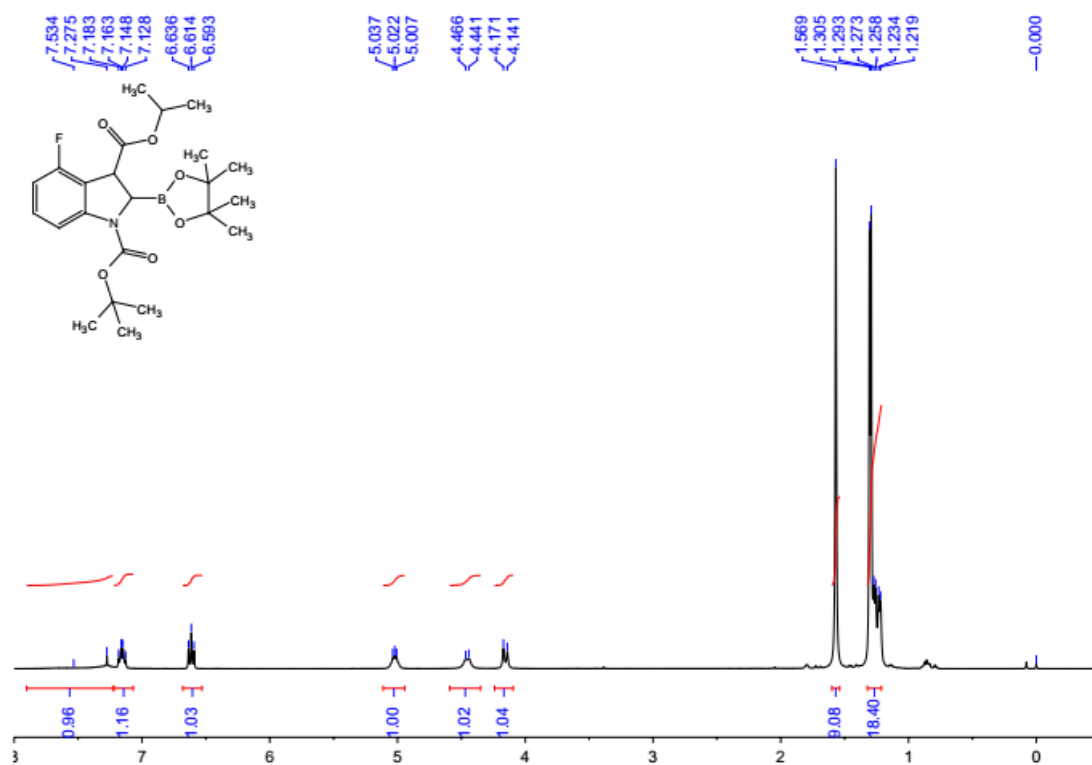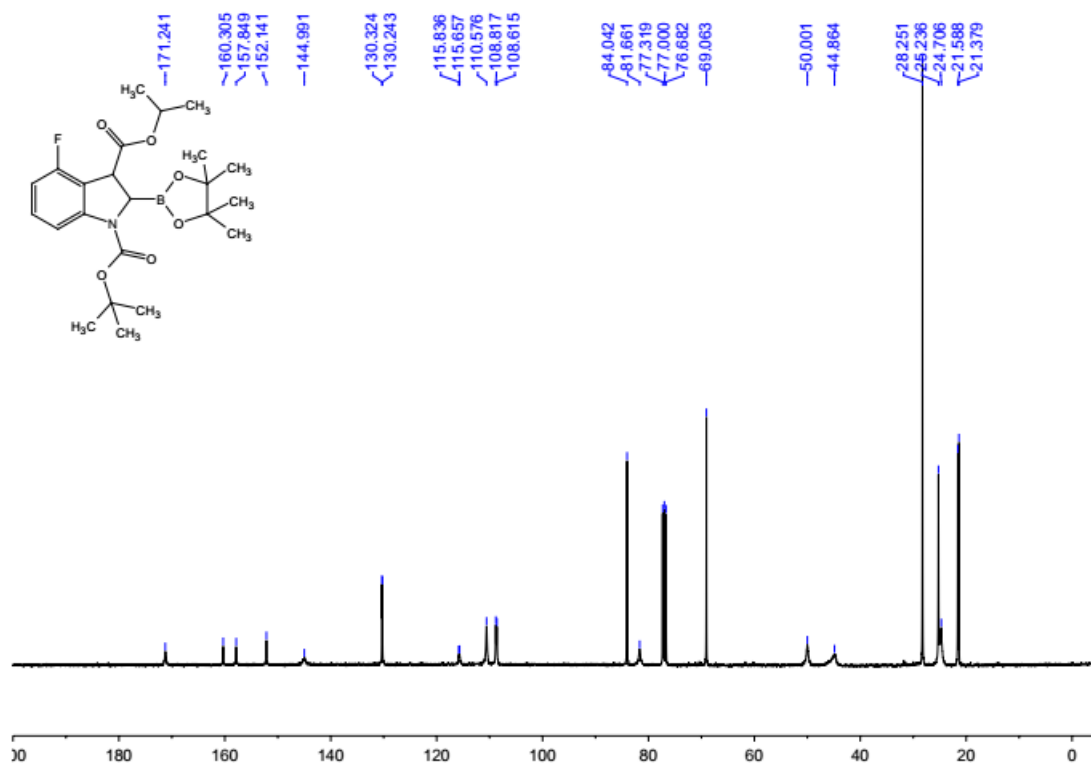

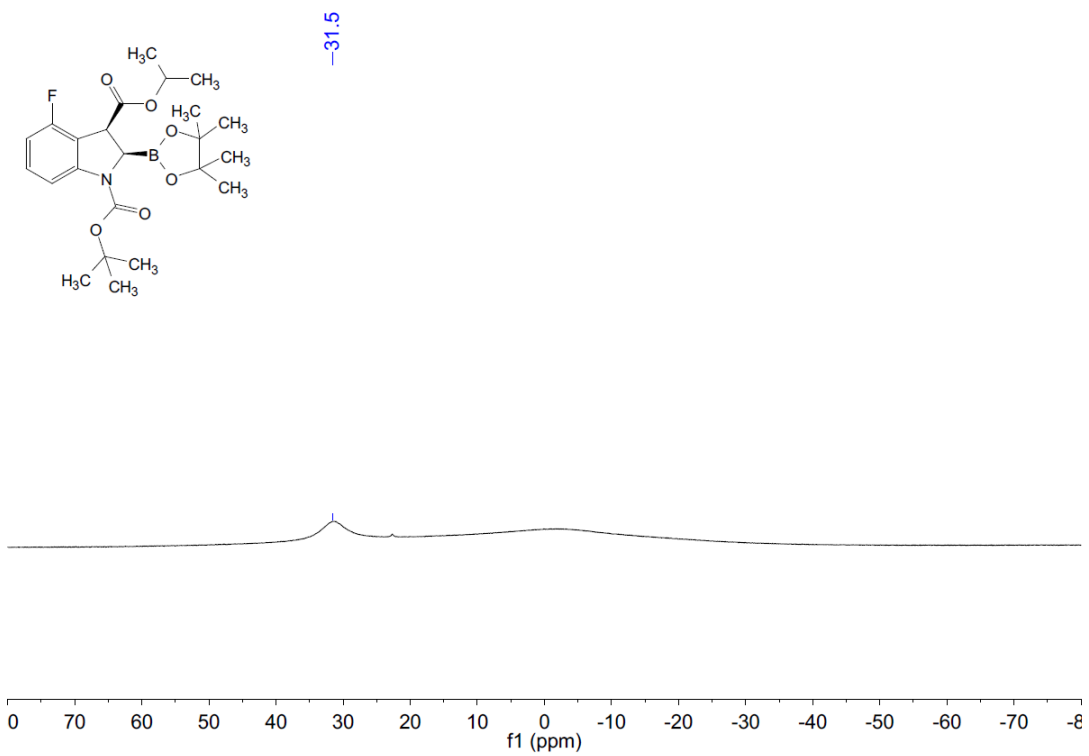

### Compound 2h

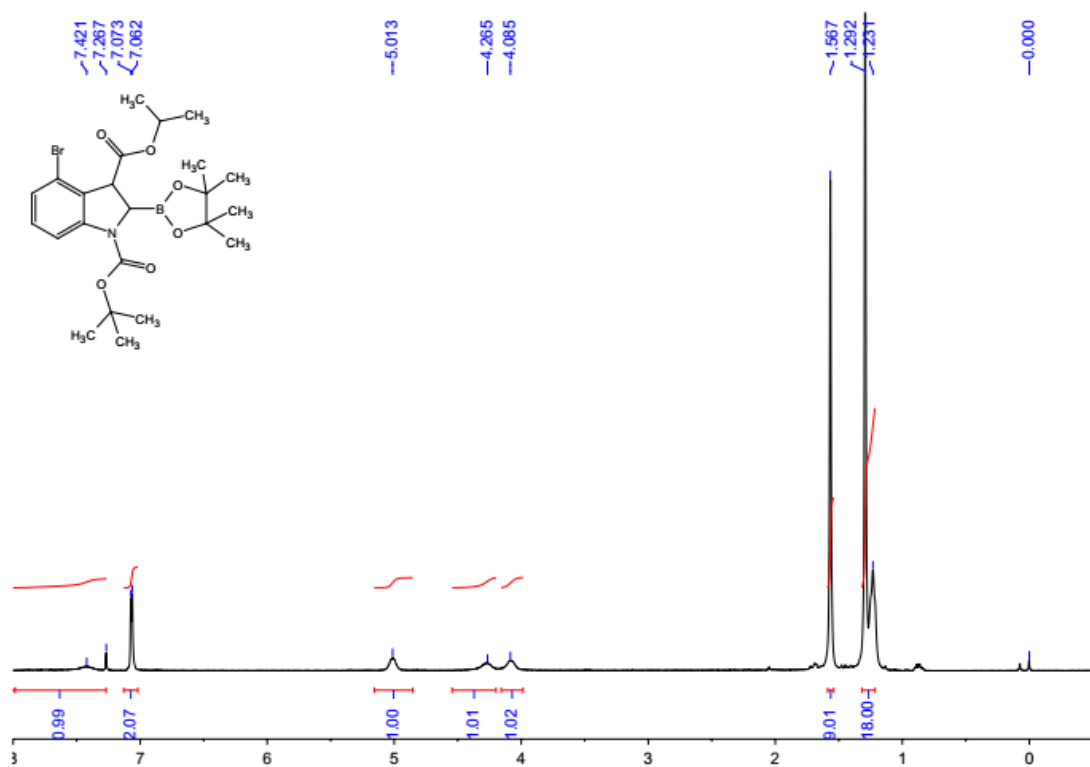

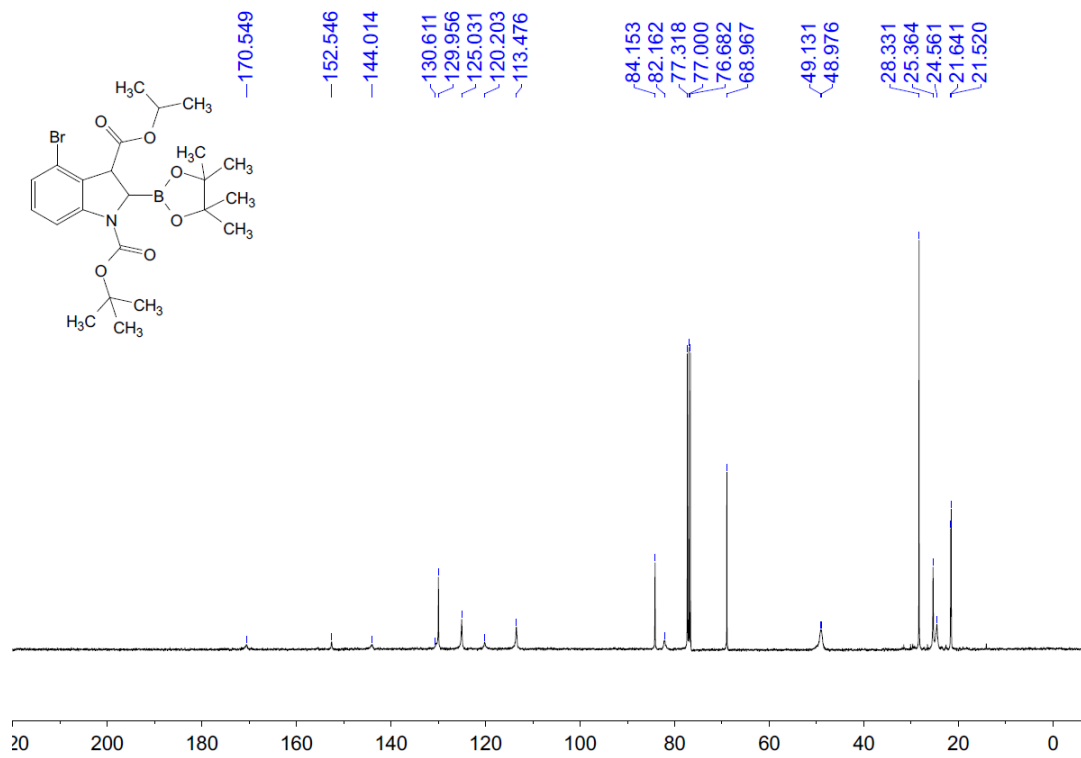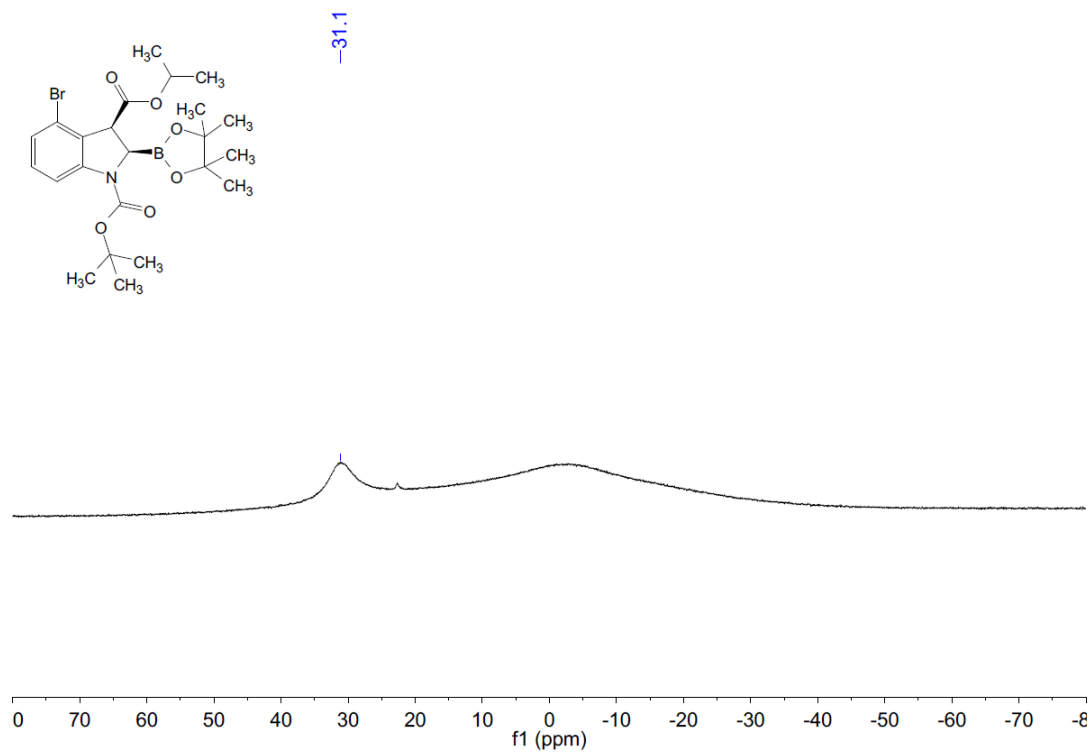

# Compound 2i

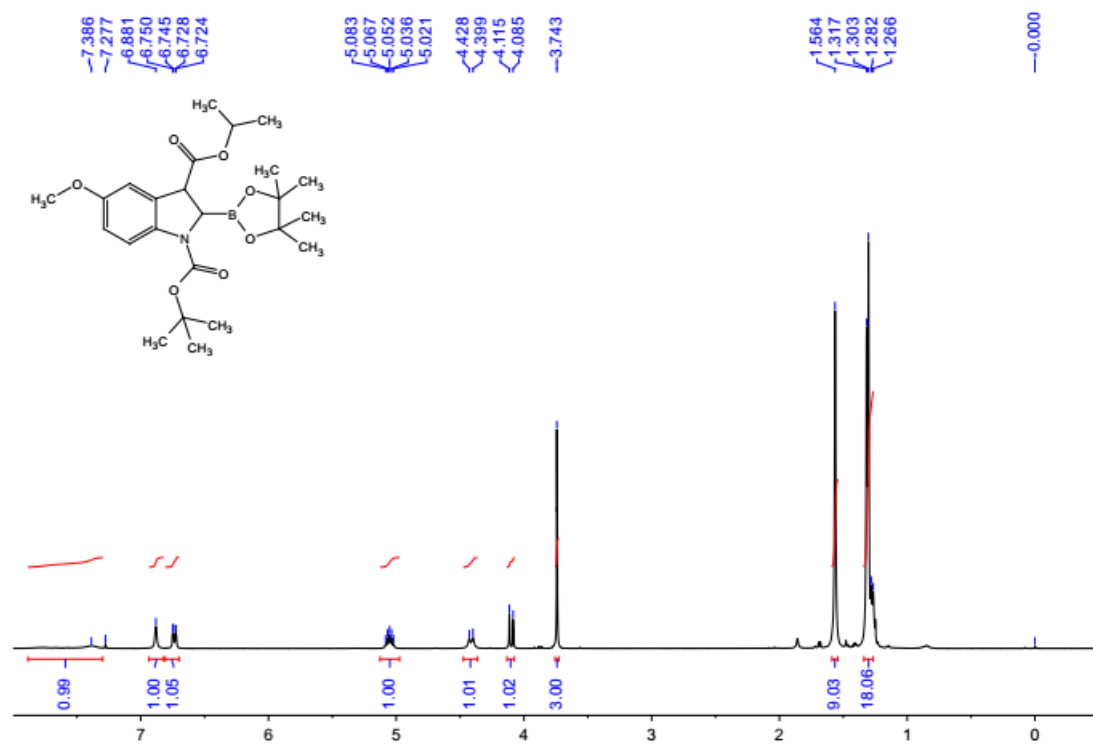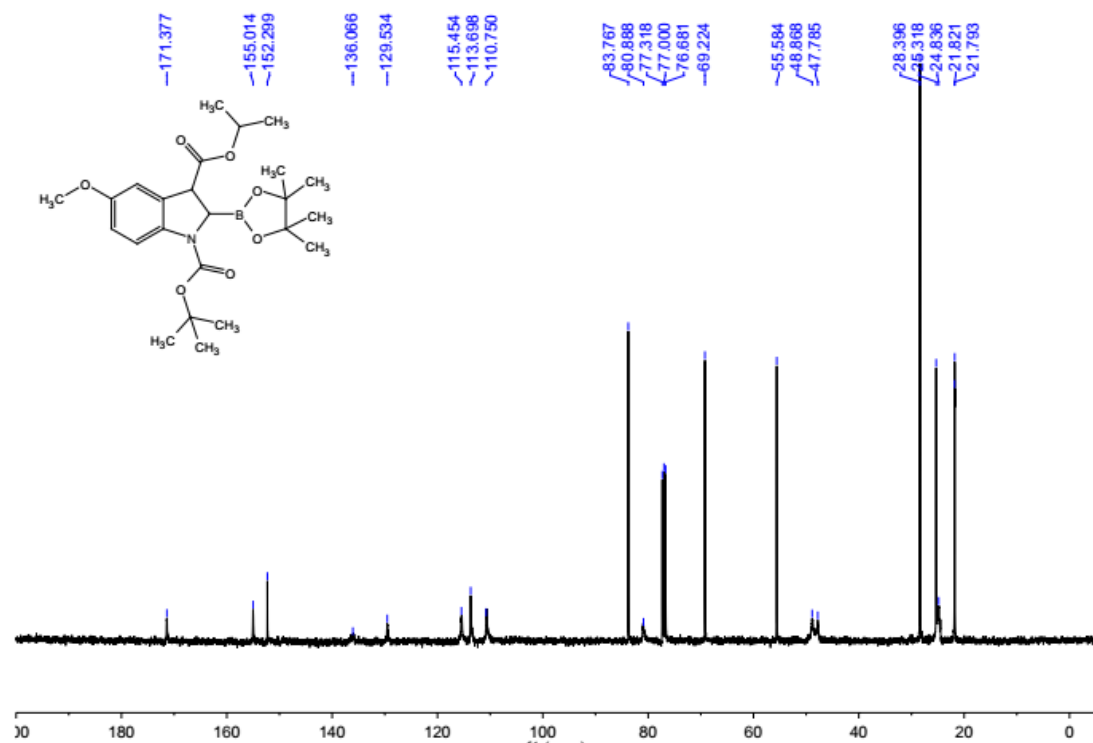

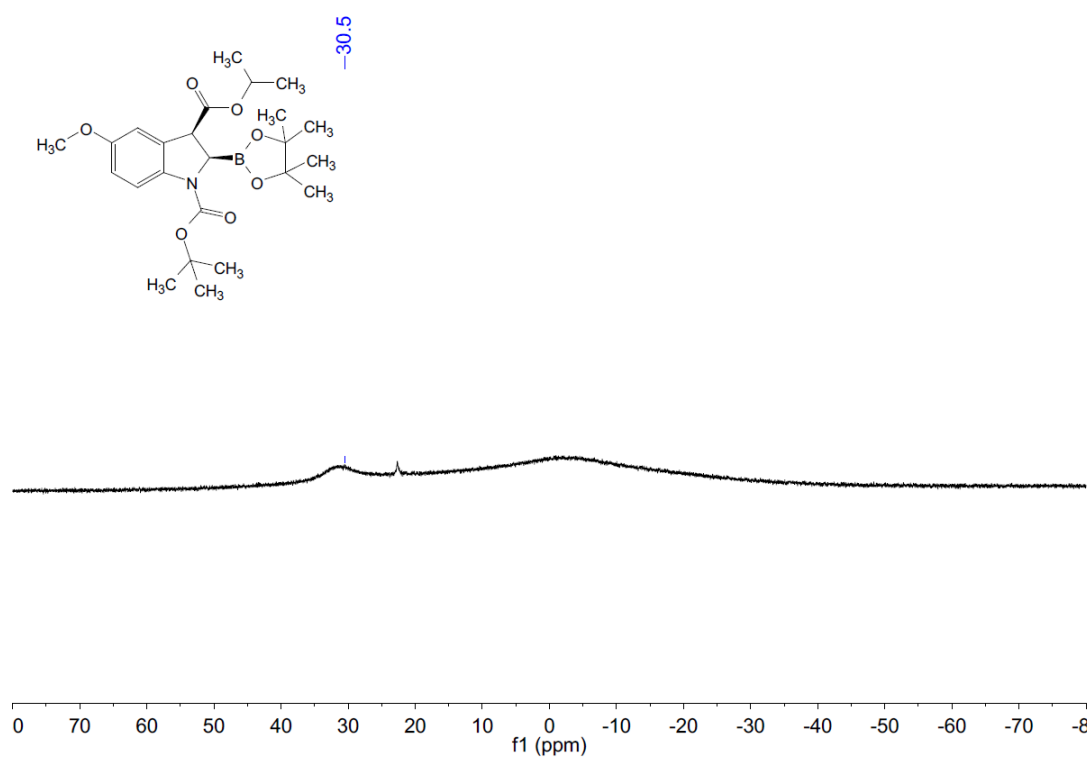

### Compound 2j

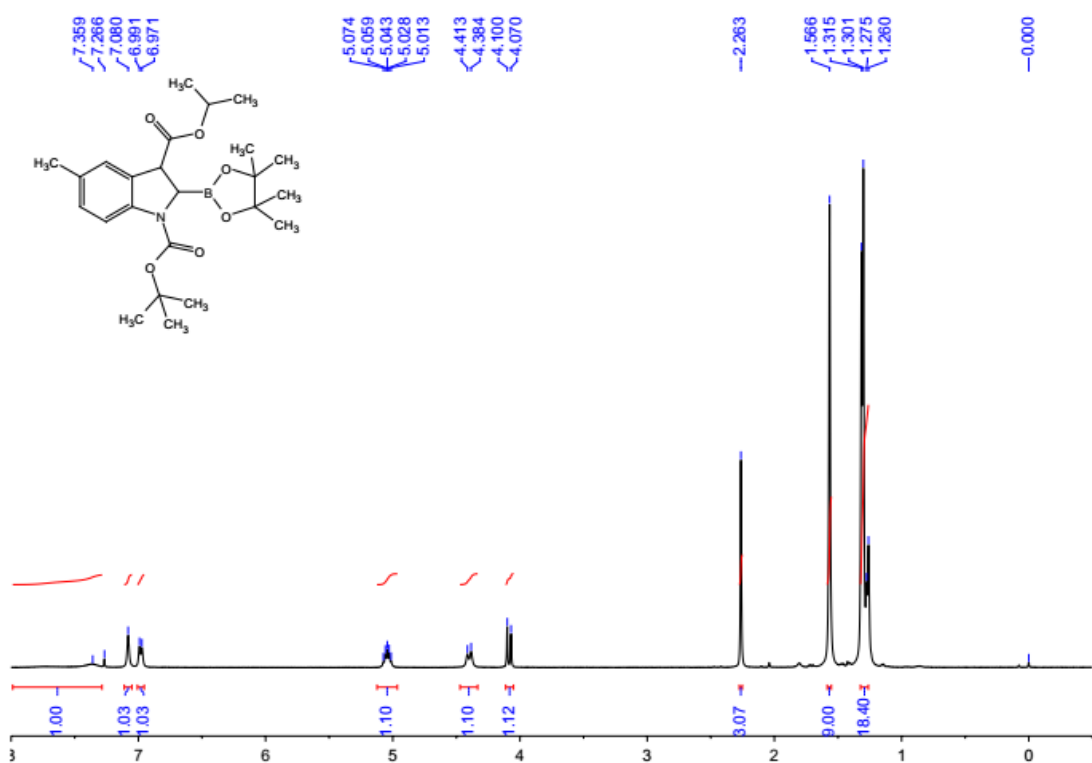

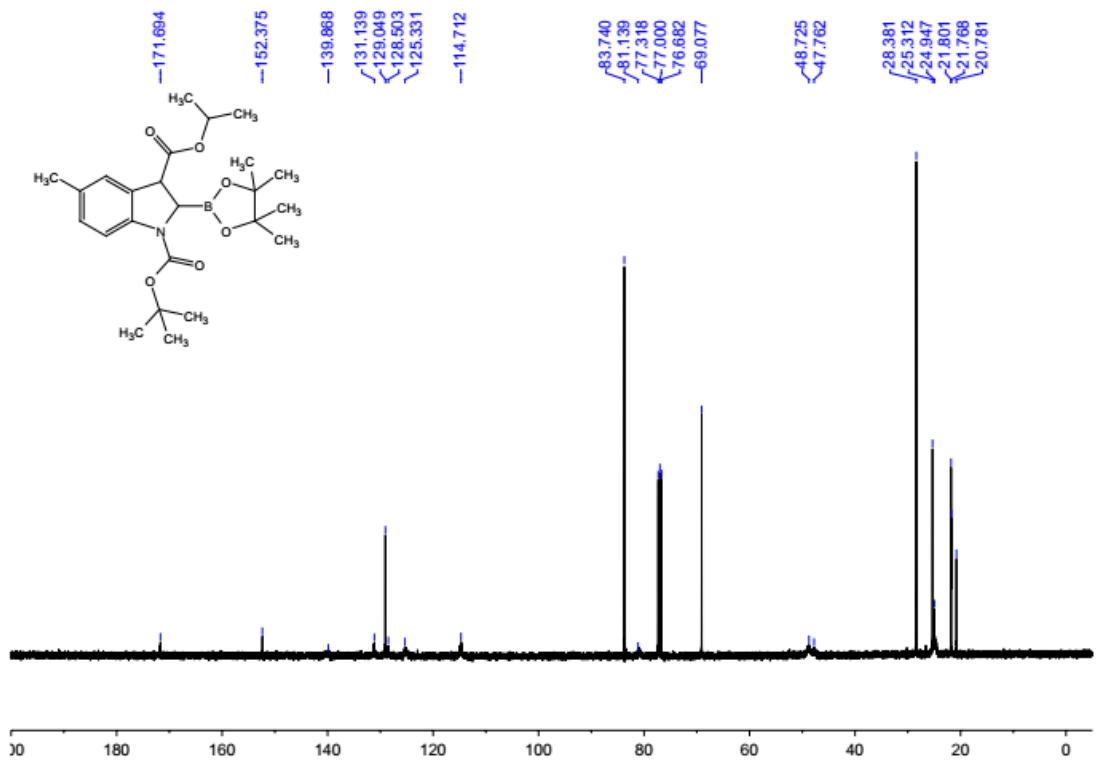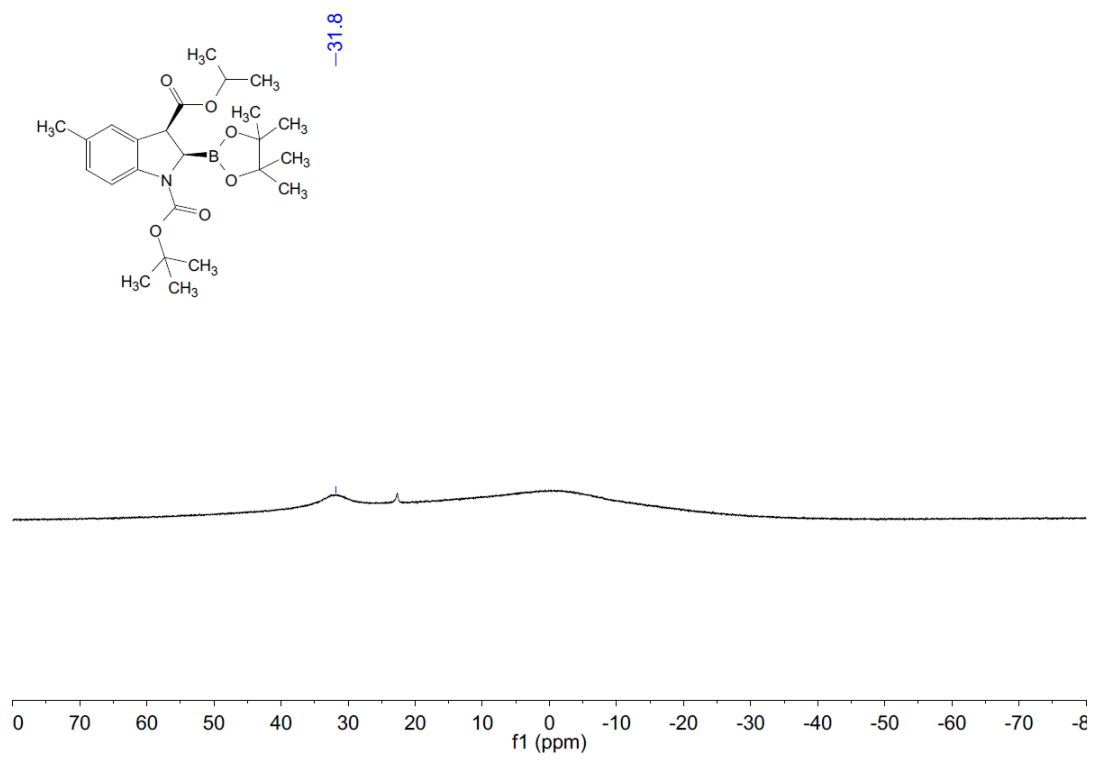

# Compound 2k

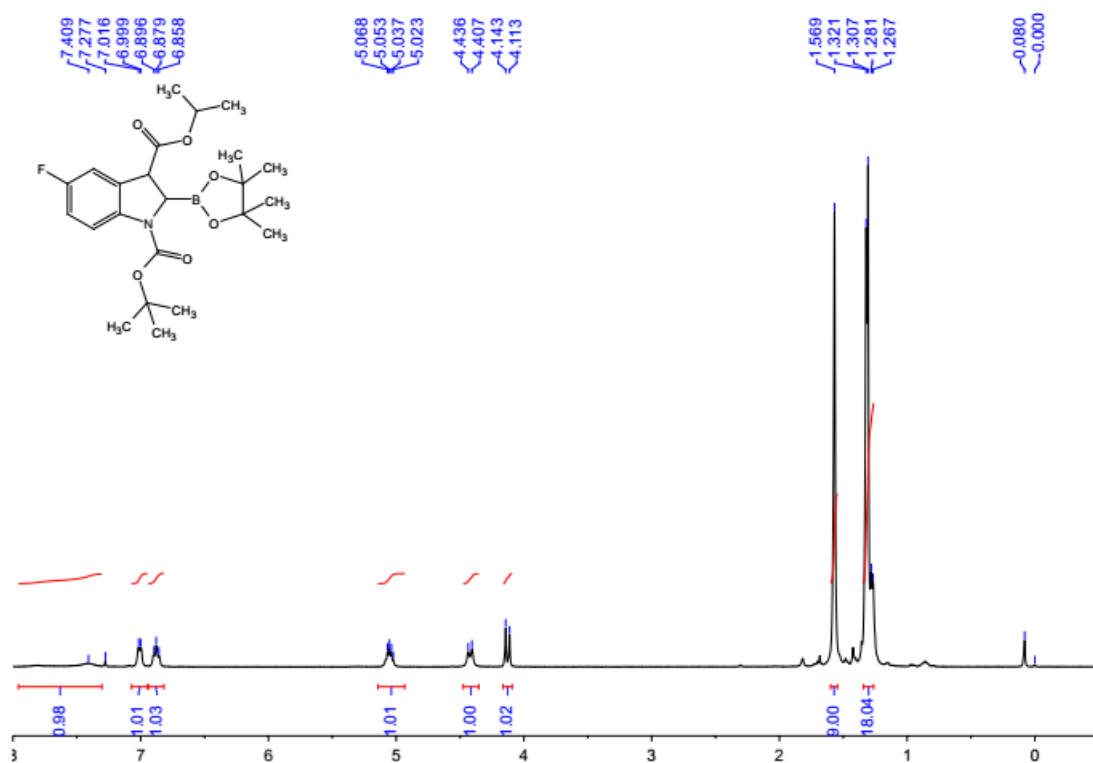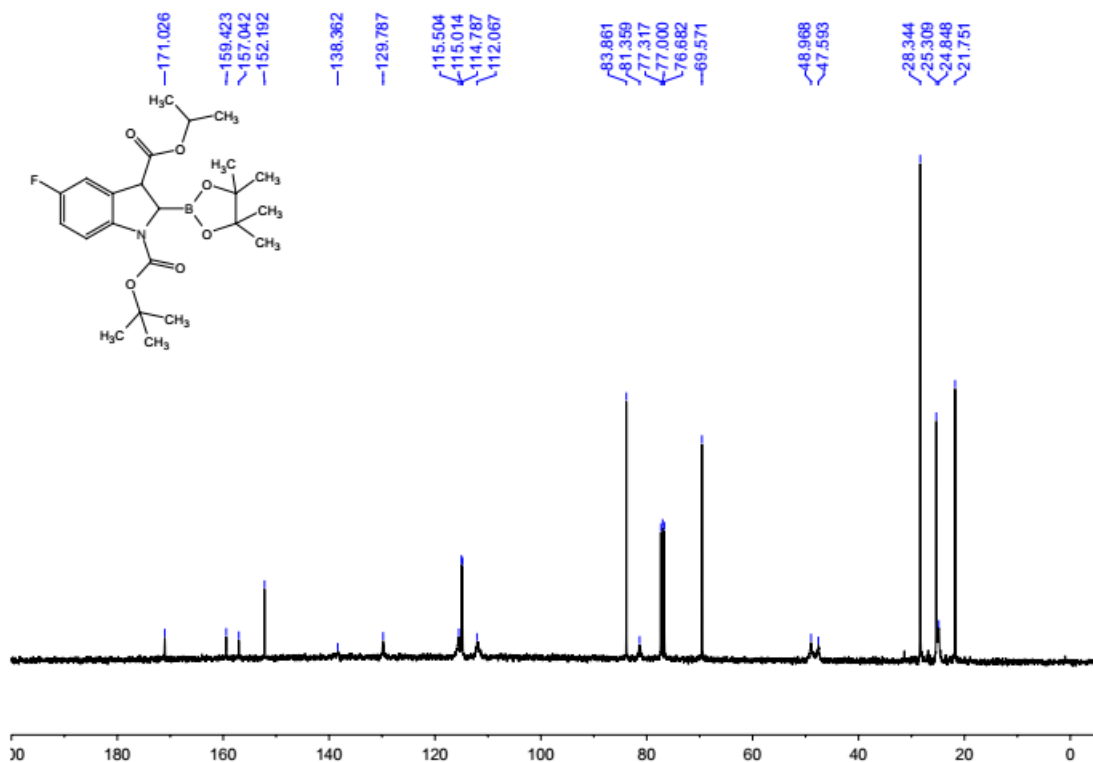

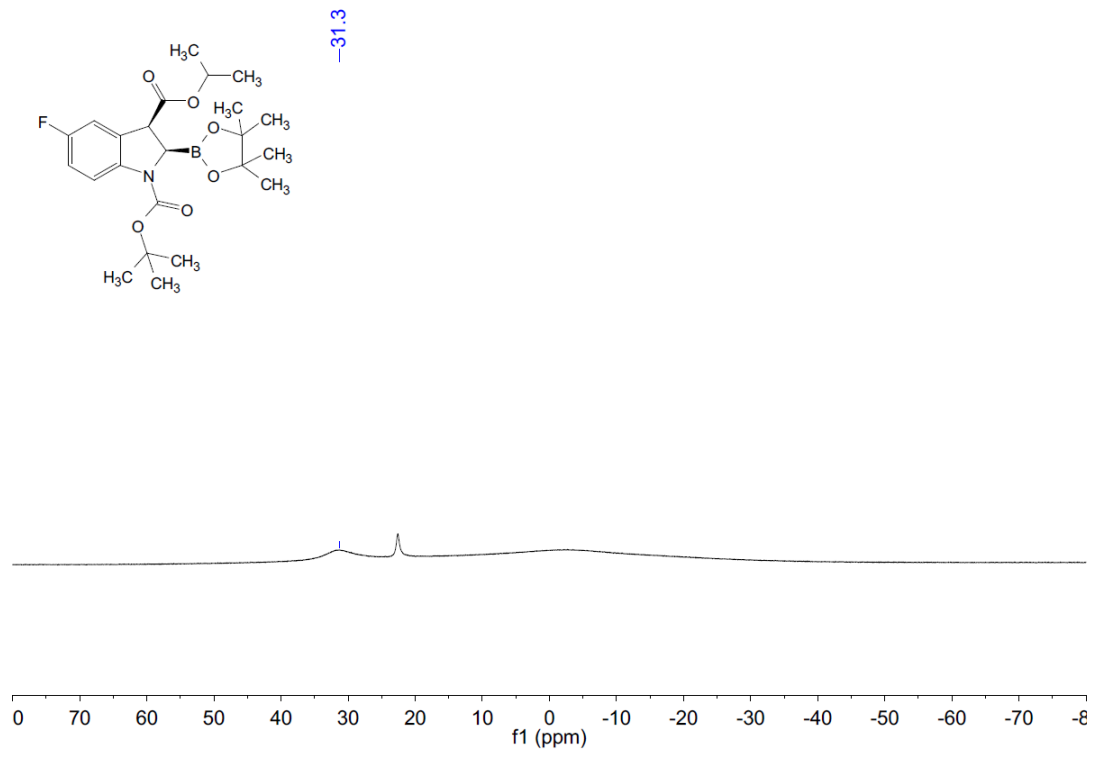

**Compound 2l**

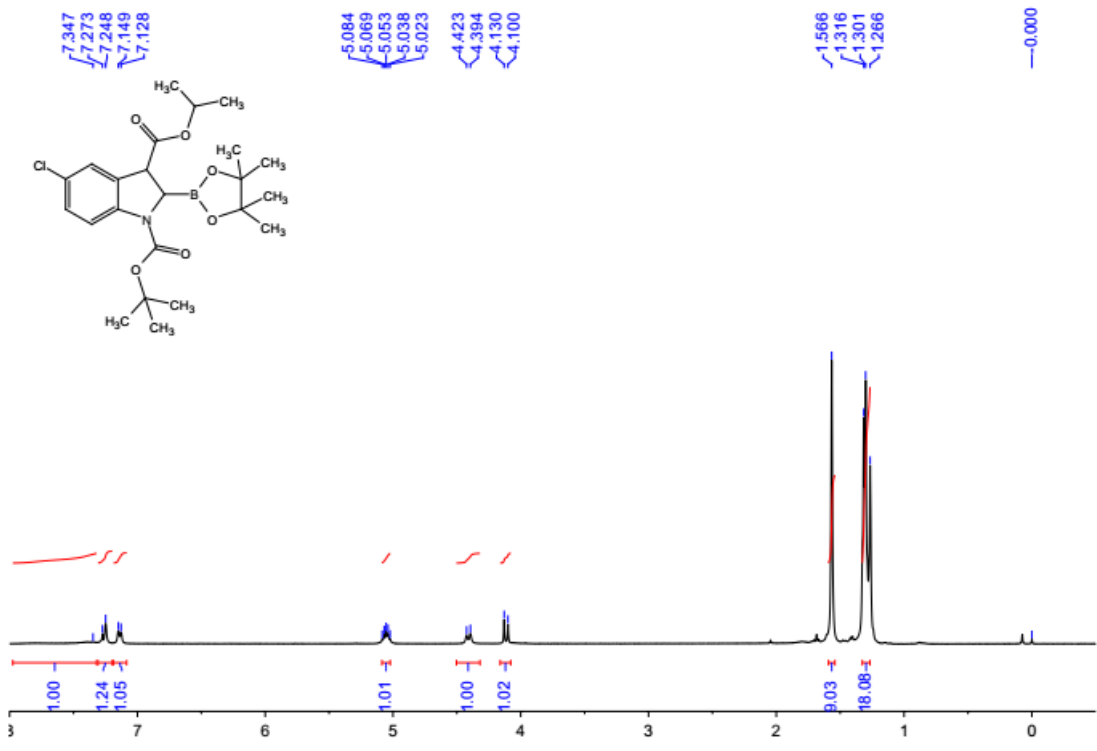



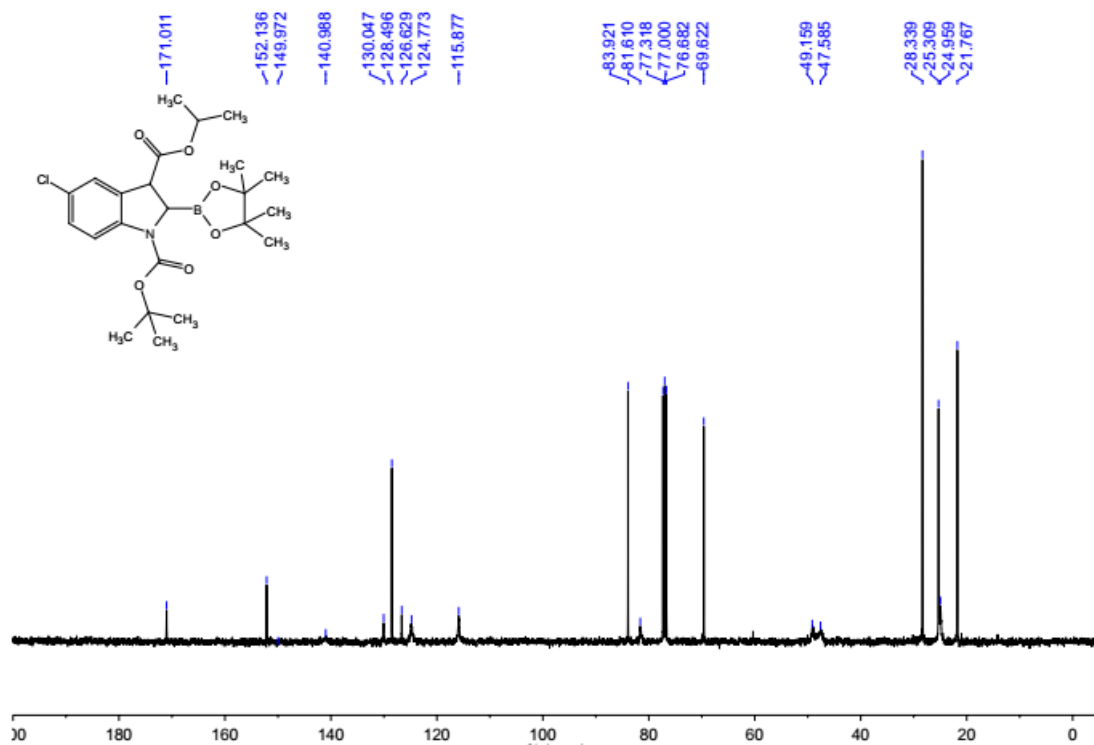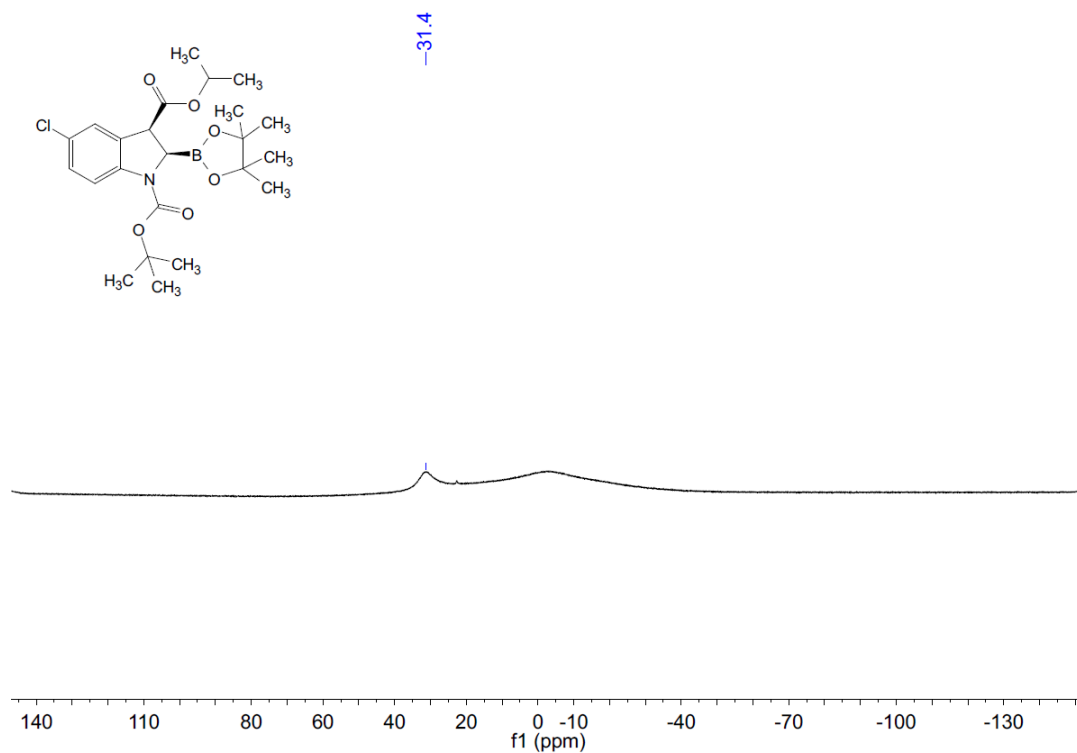

# Compound 2m

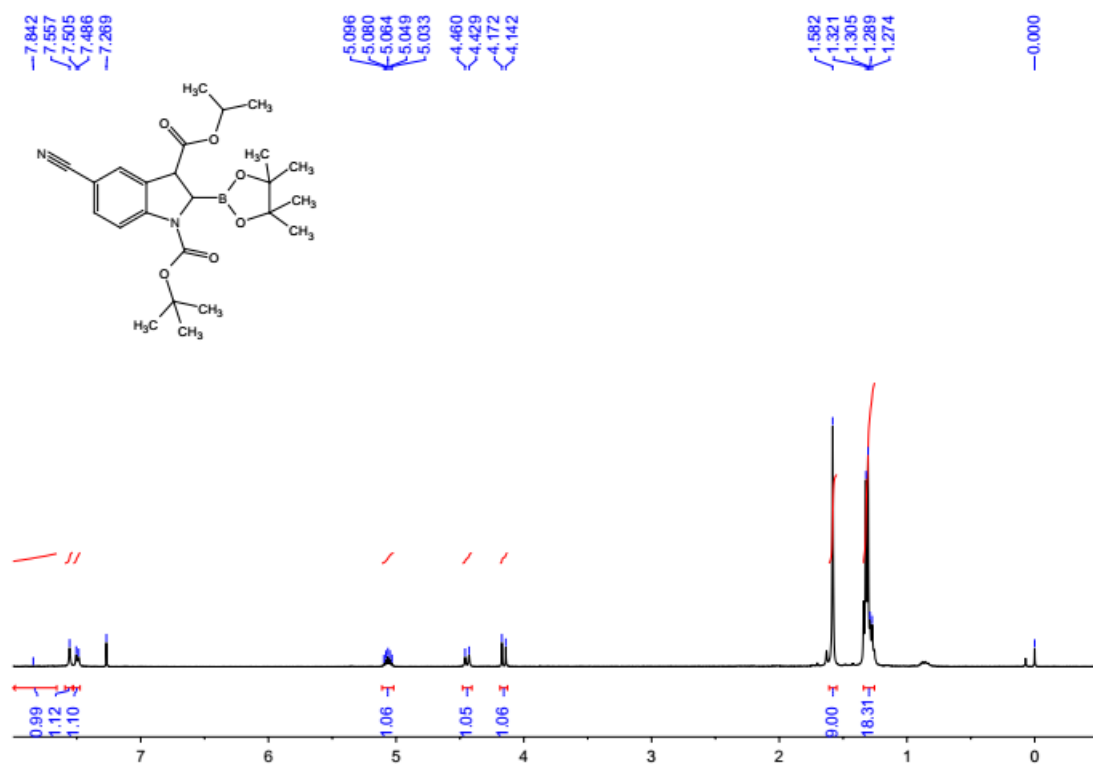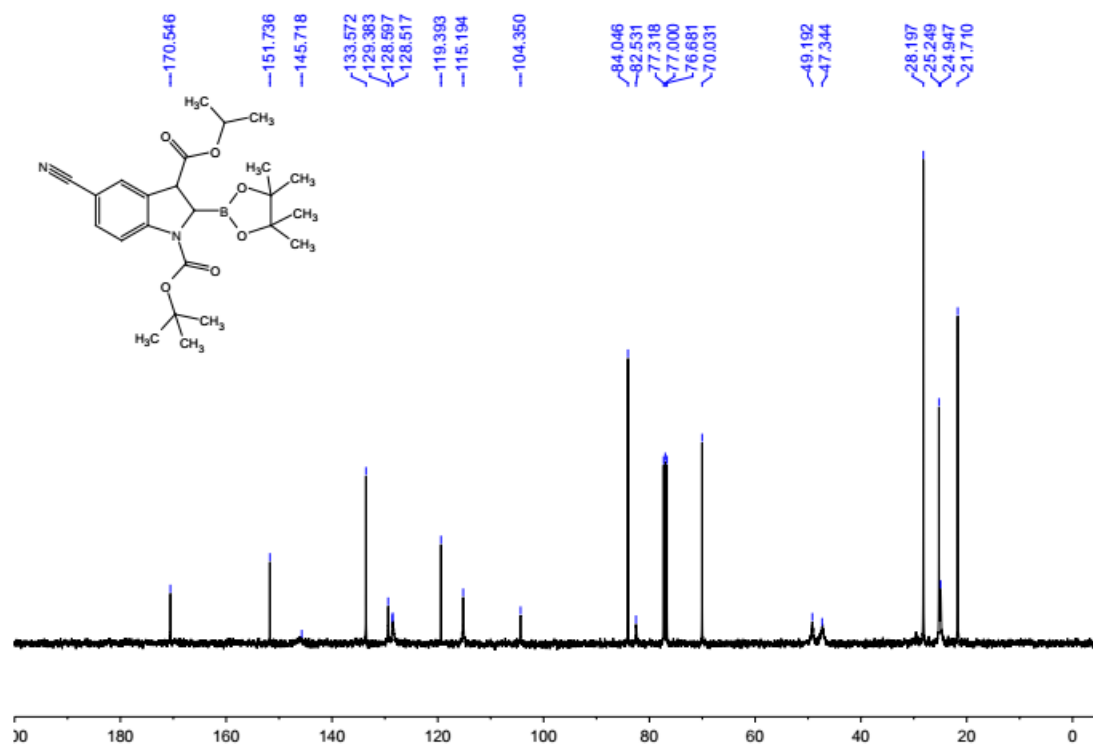

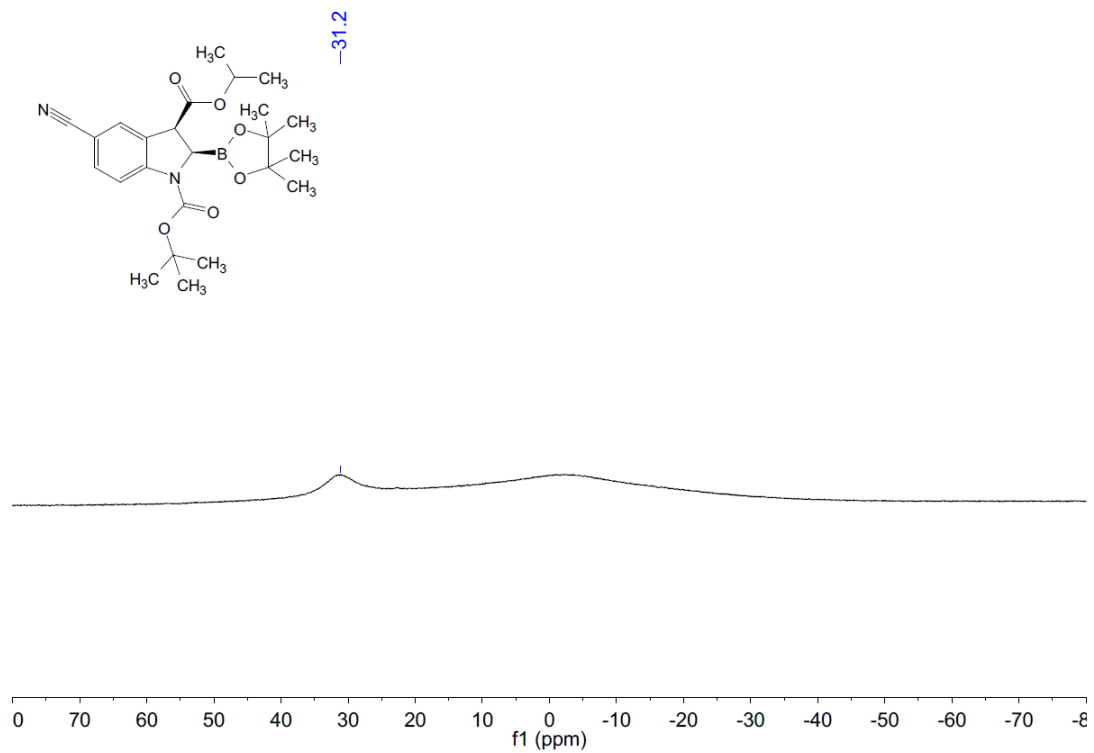

### Compound 2n

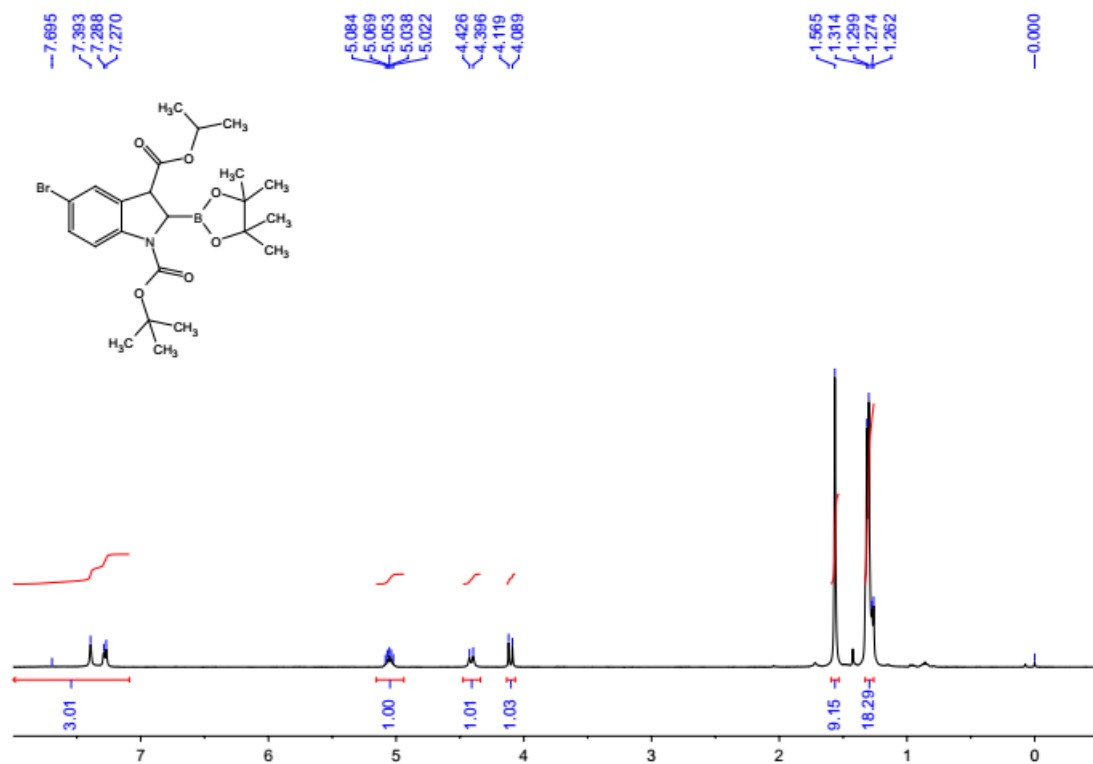

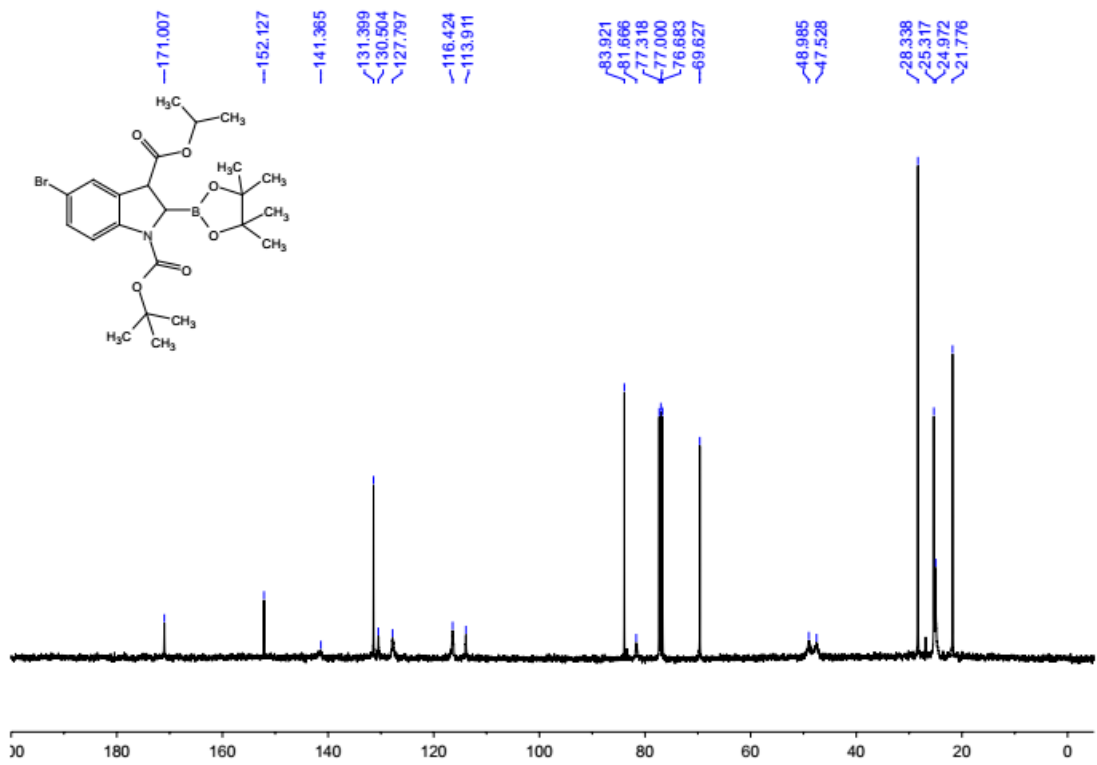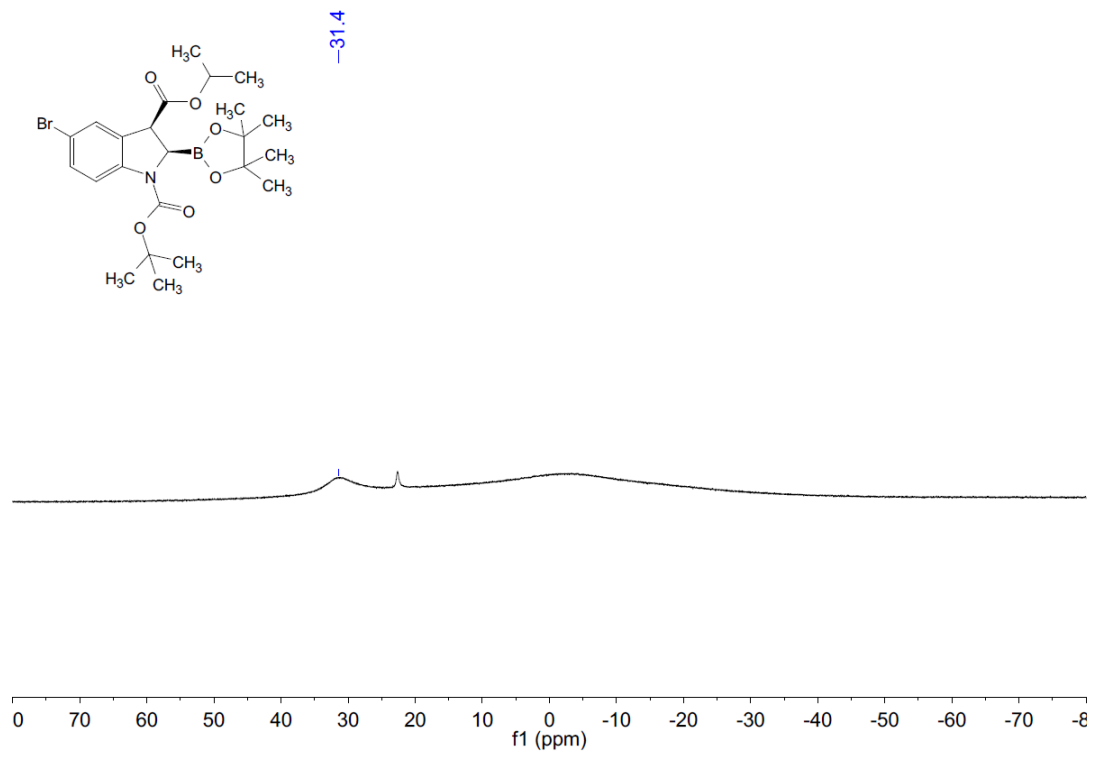

# Compound 2o

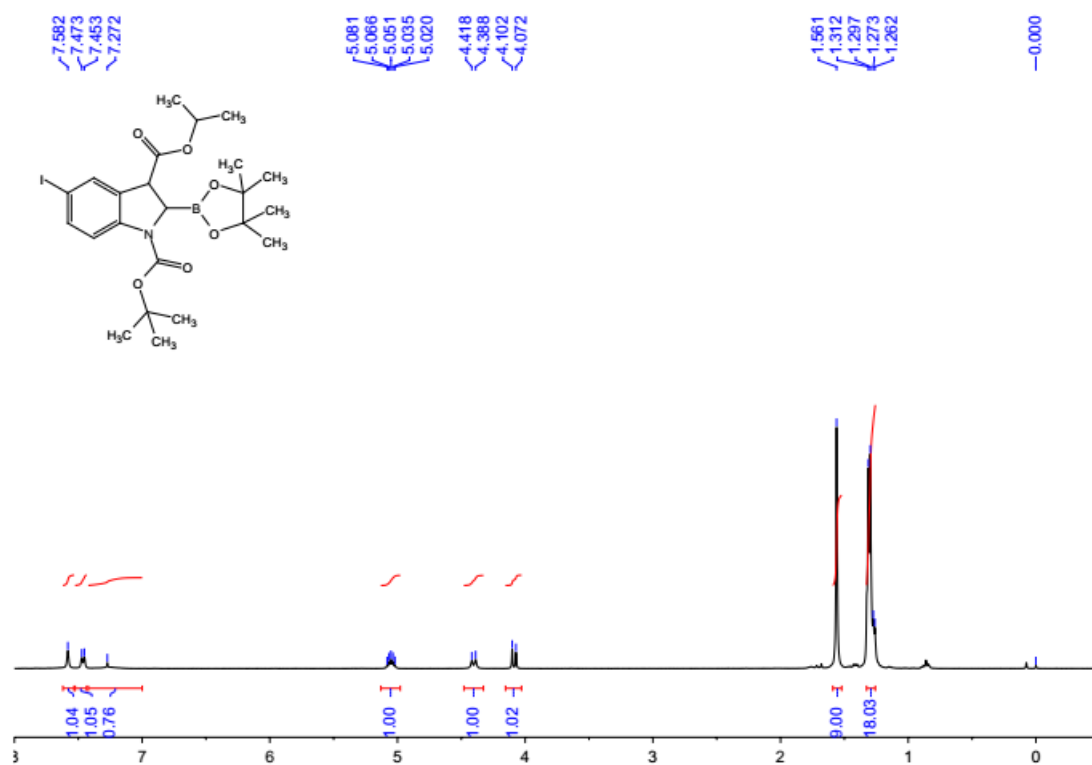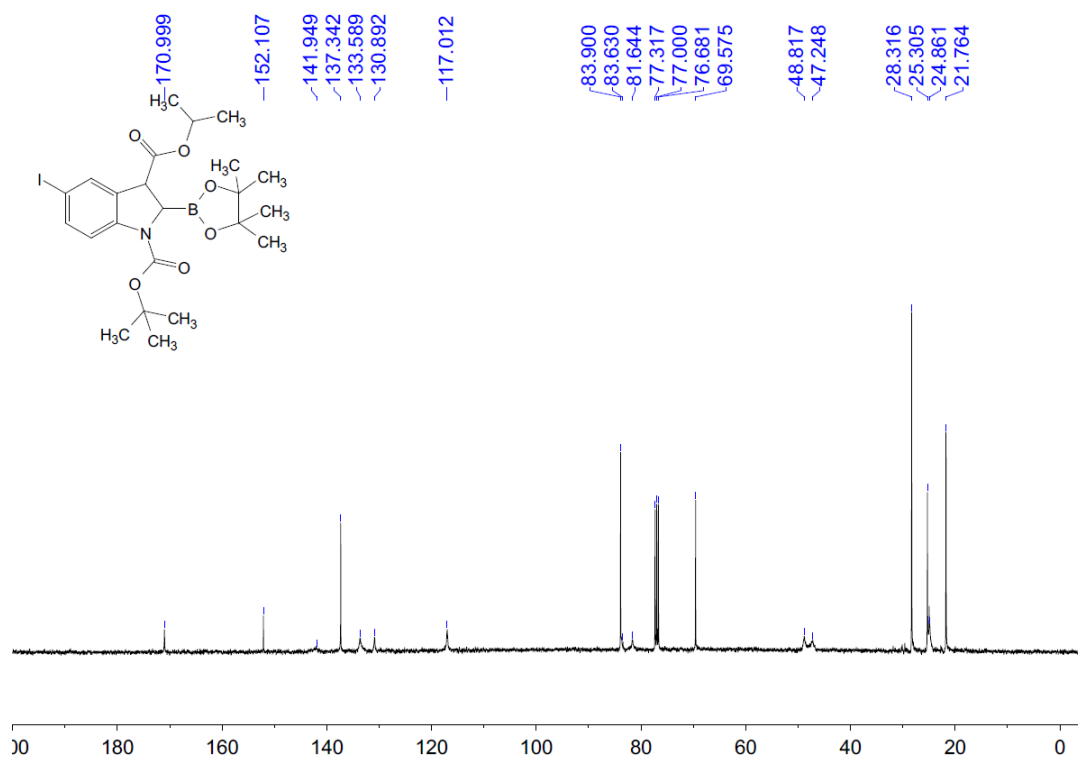

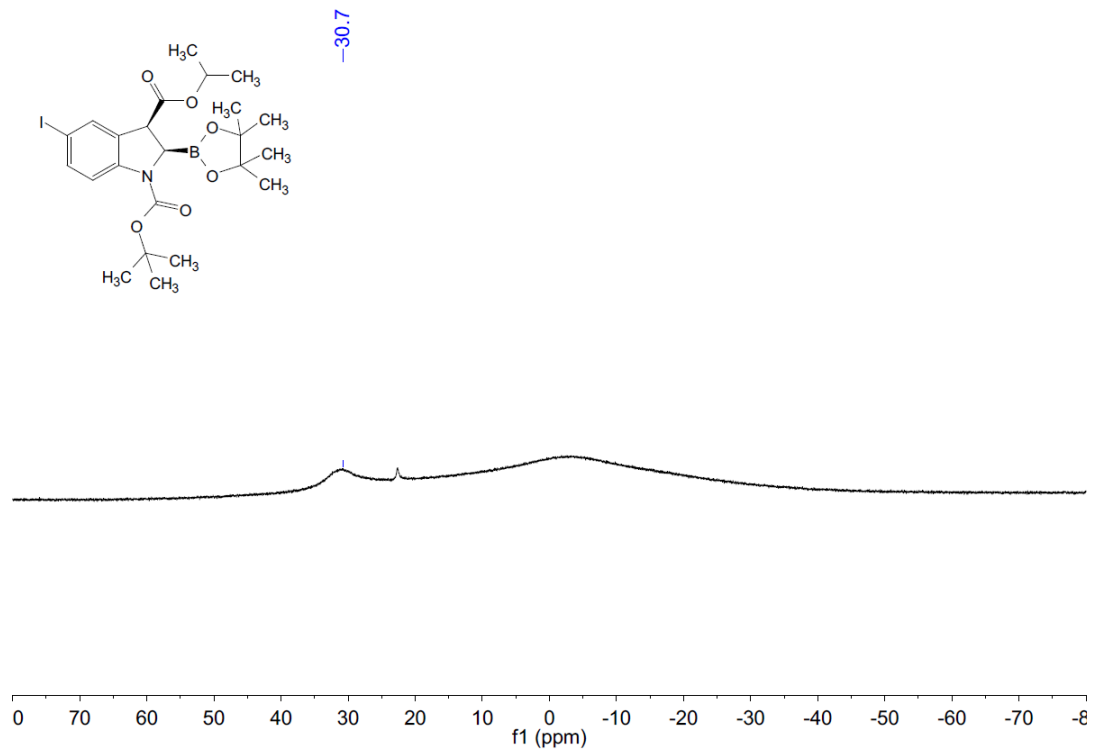

**Compound 2p**

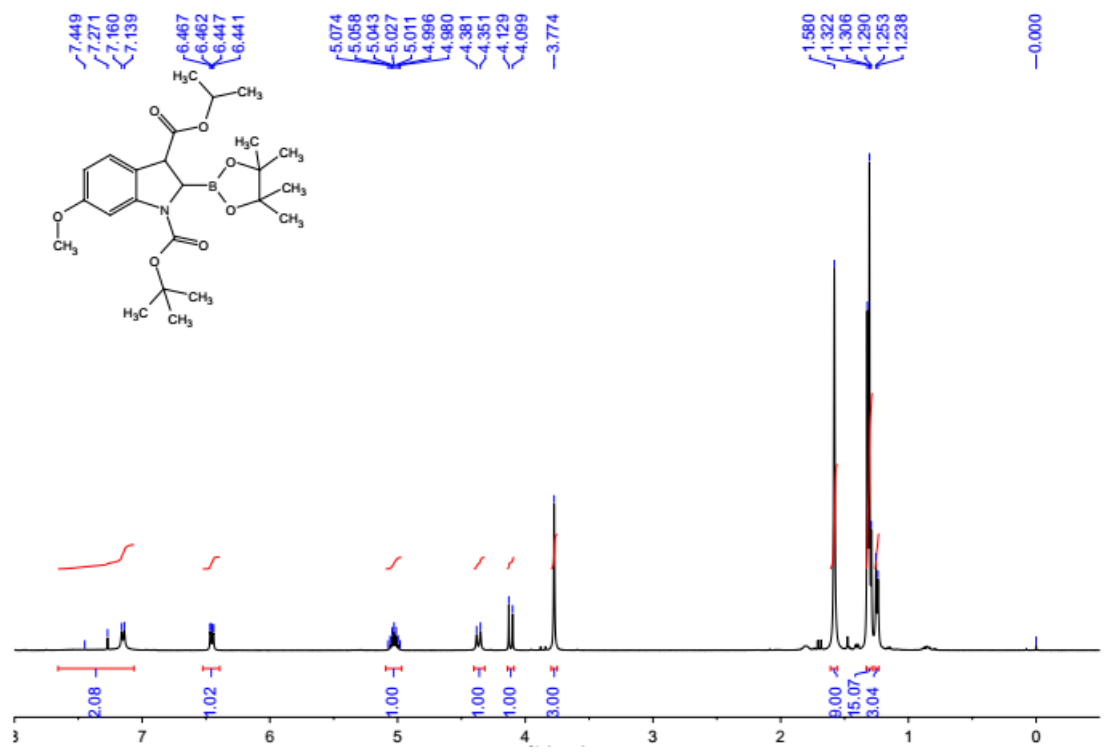

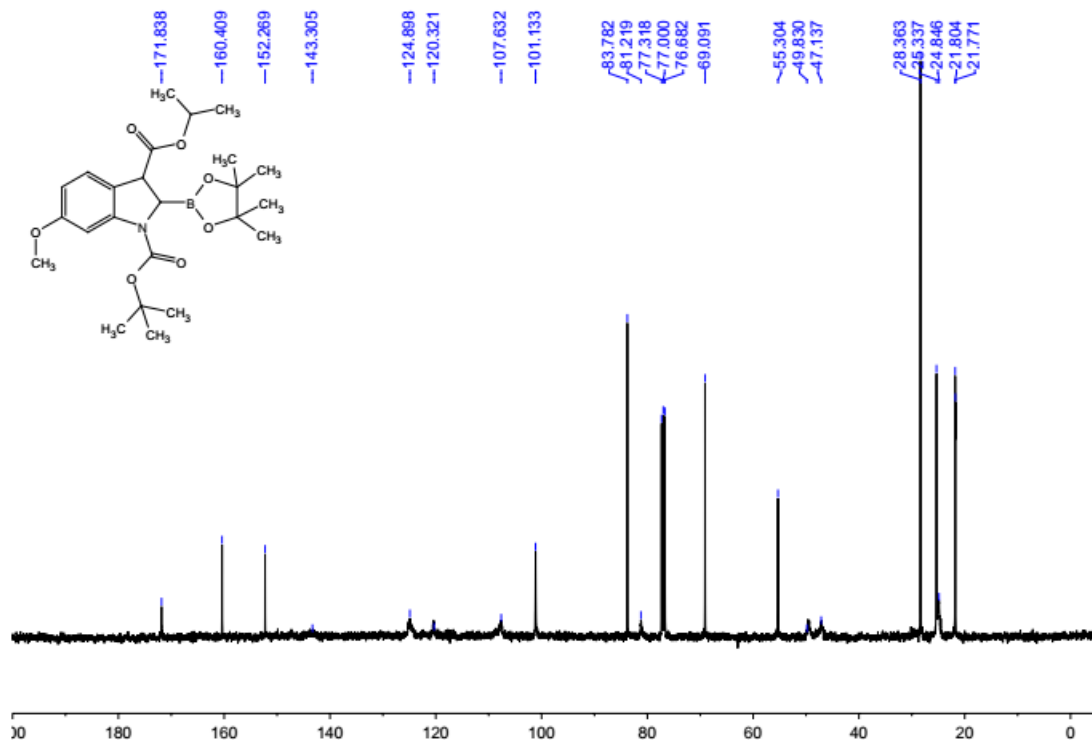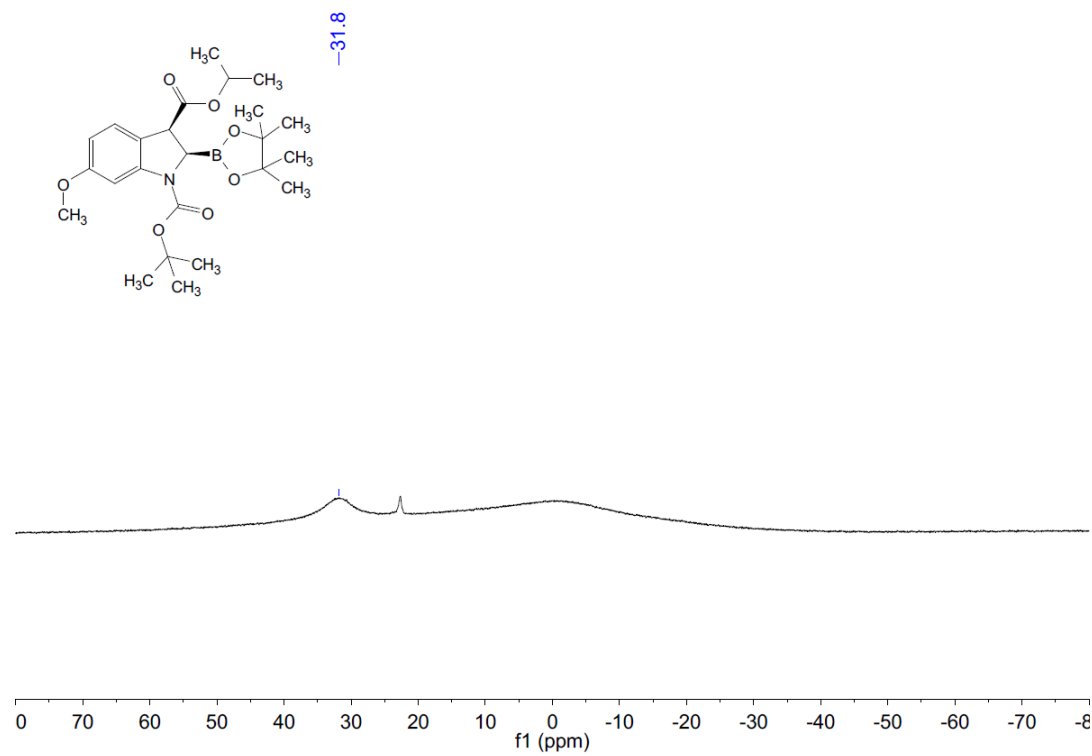

# Compound 2q

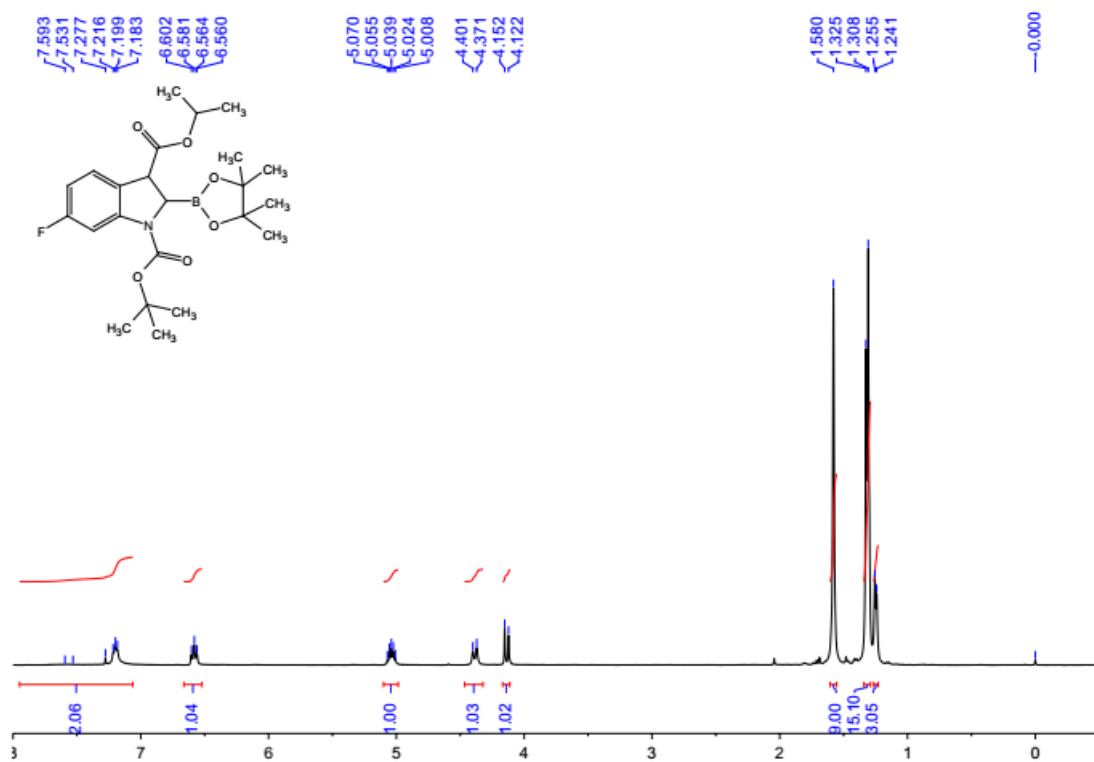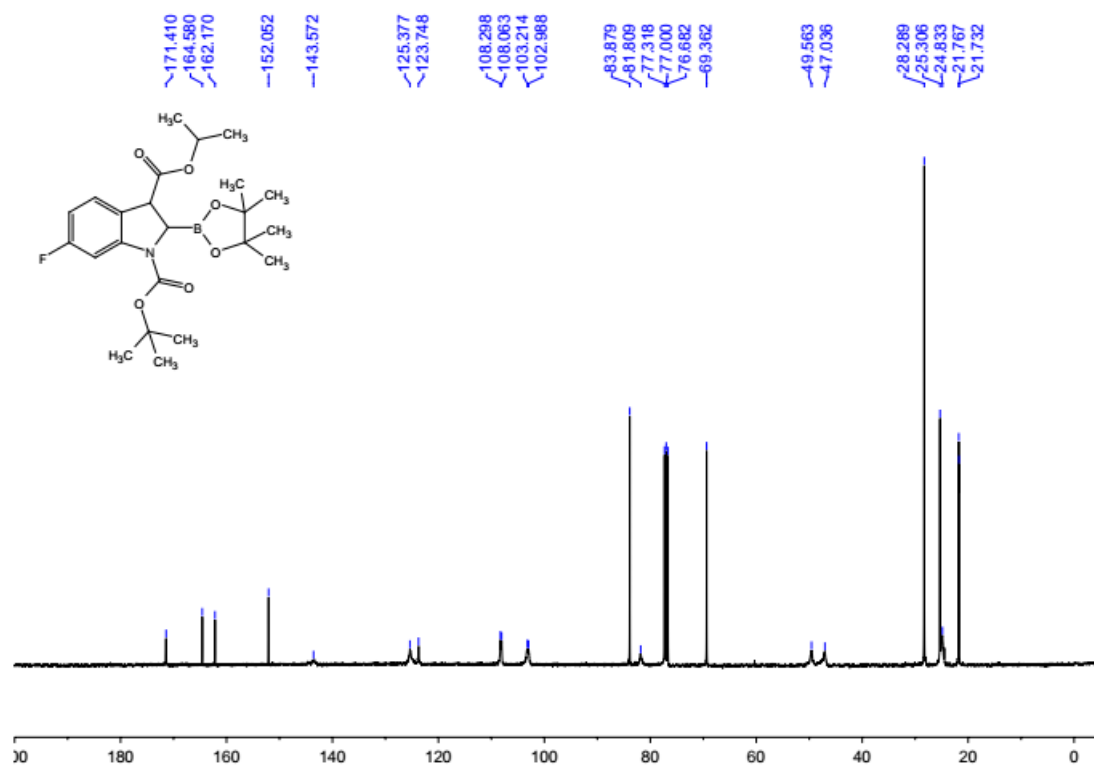



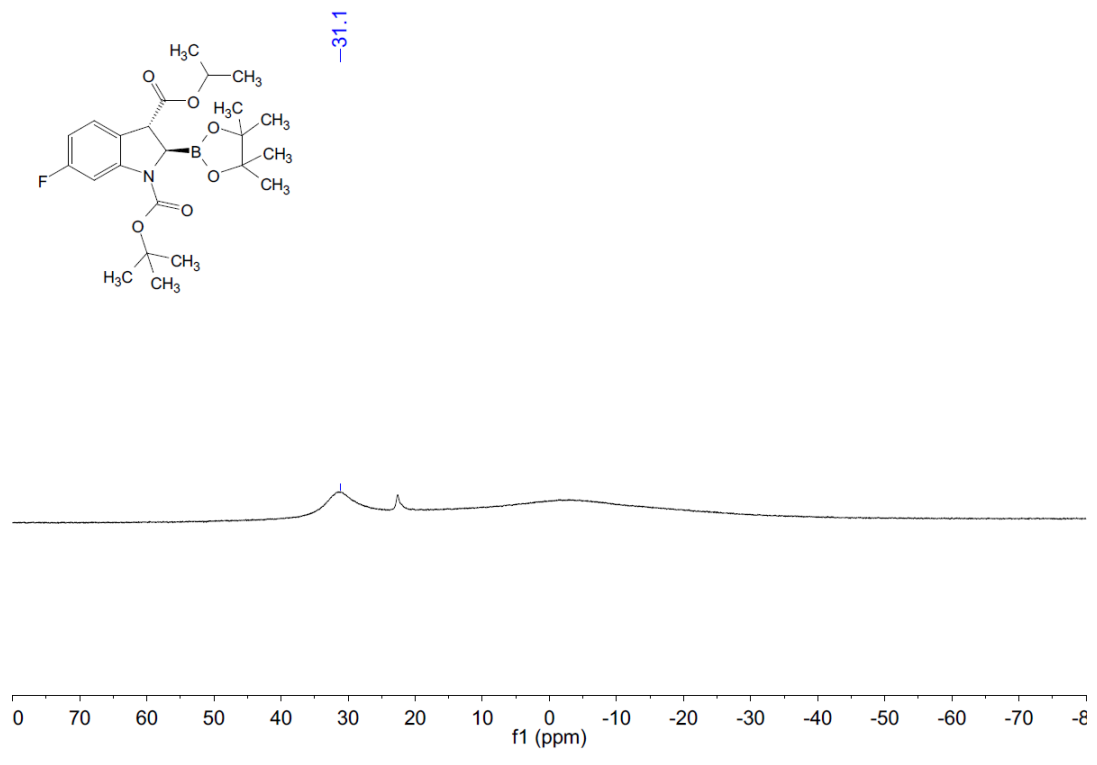

**Compound 2r**

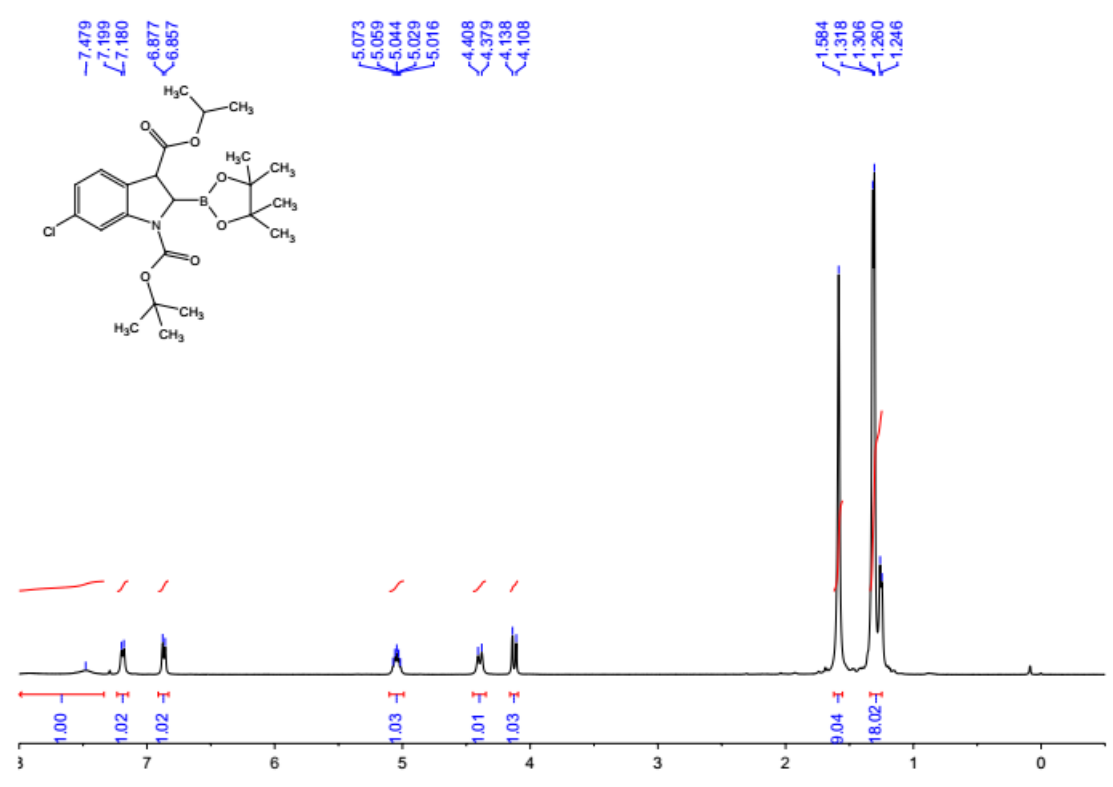

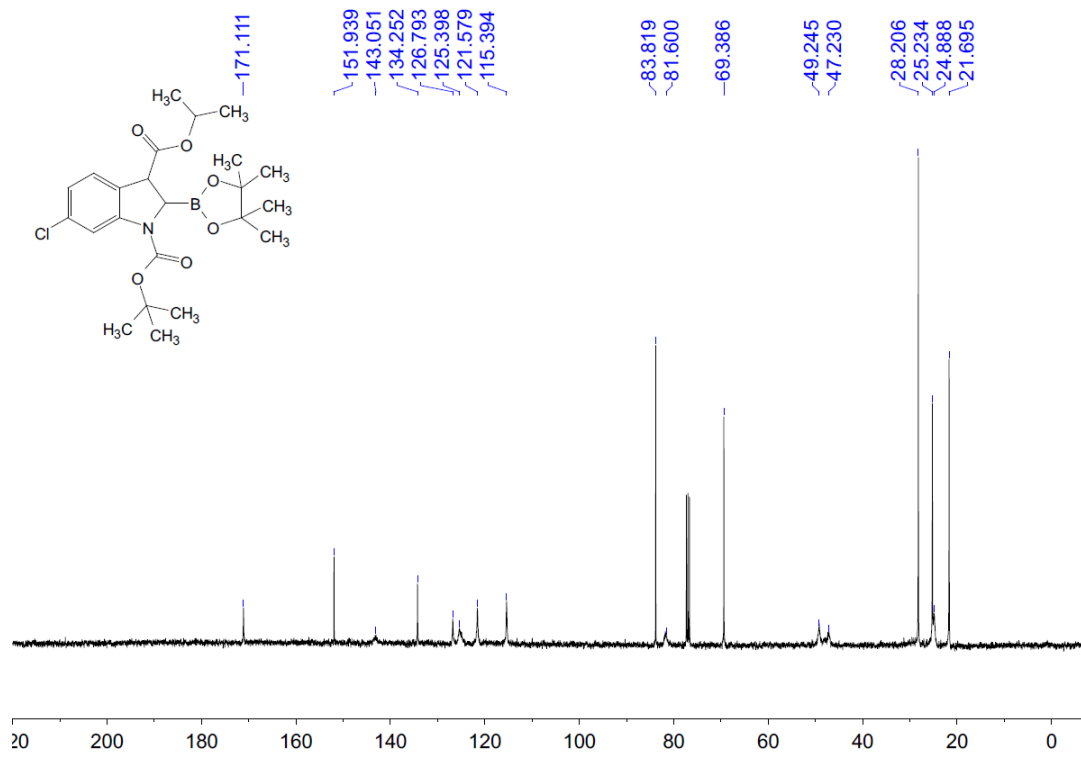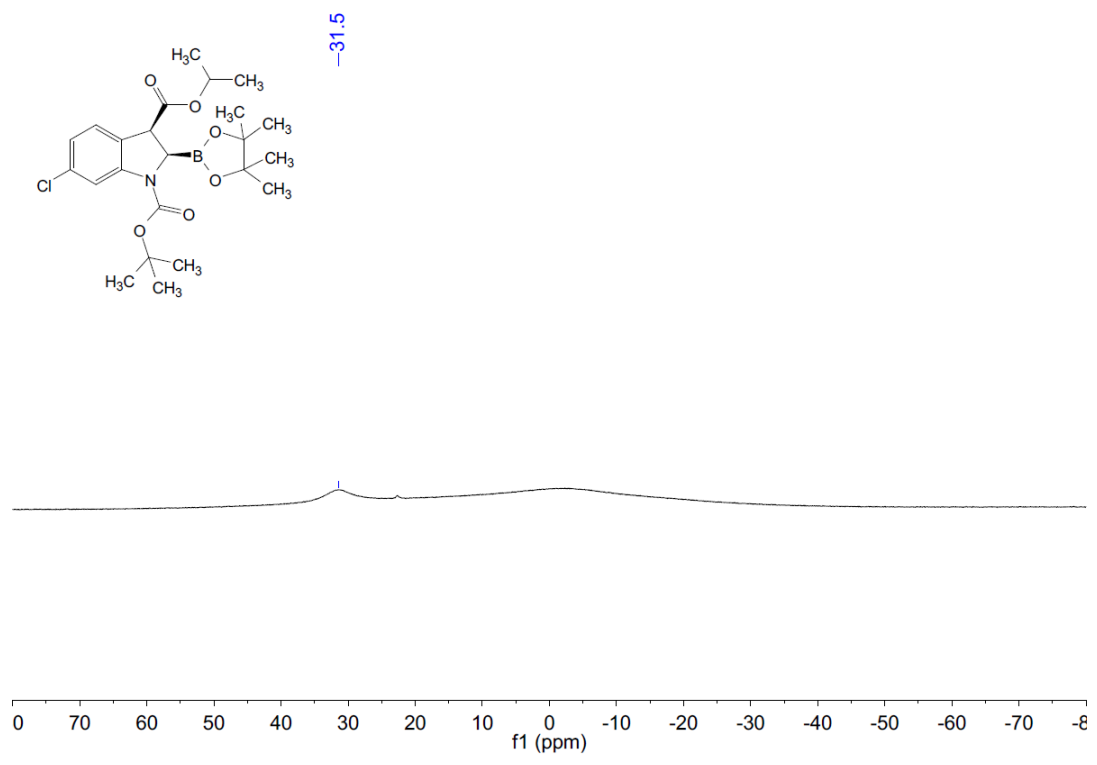

# Compound 2s

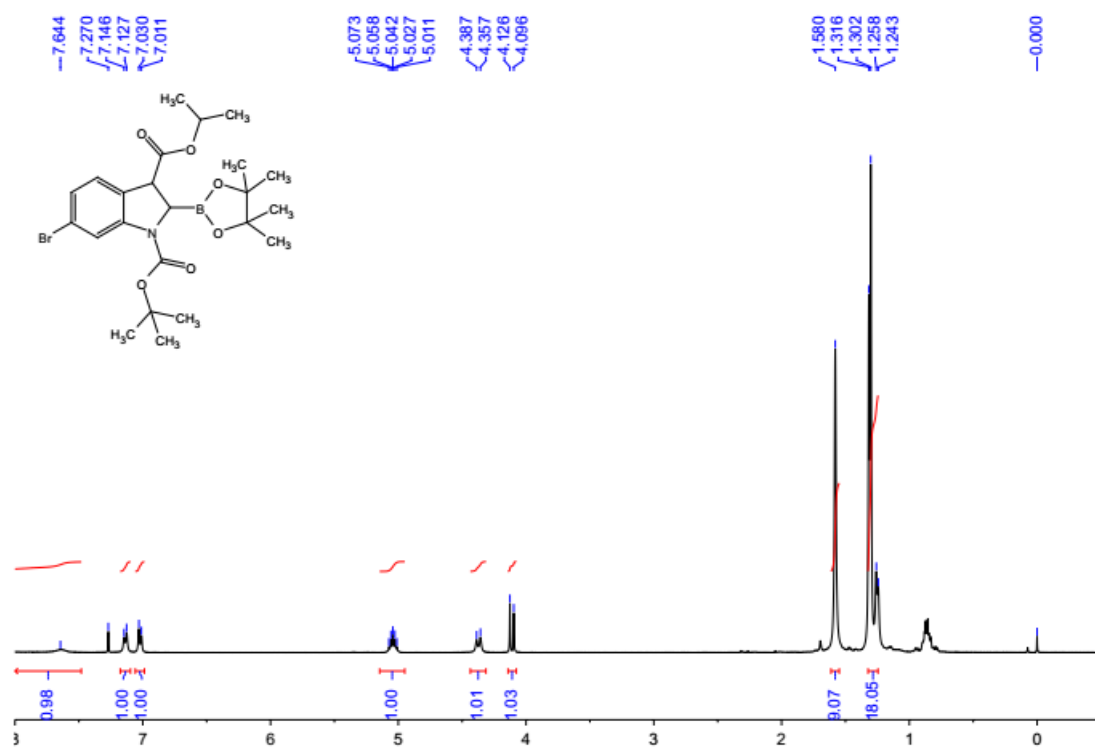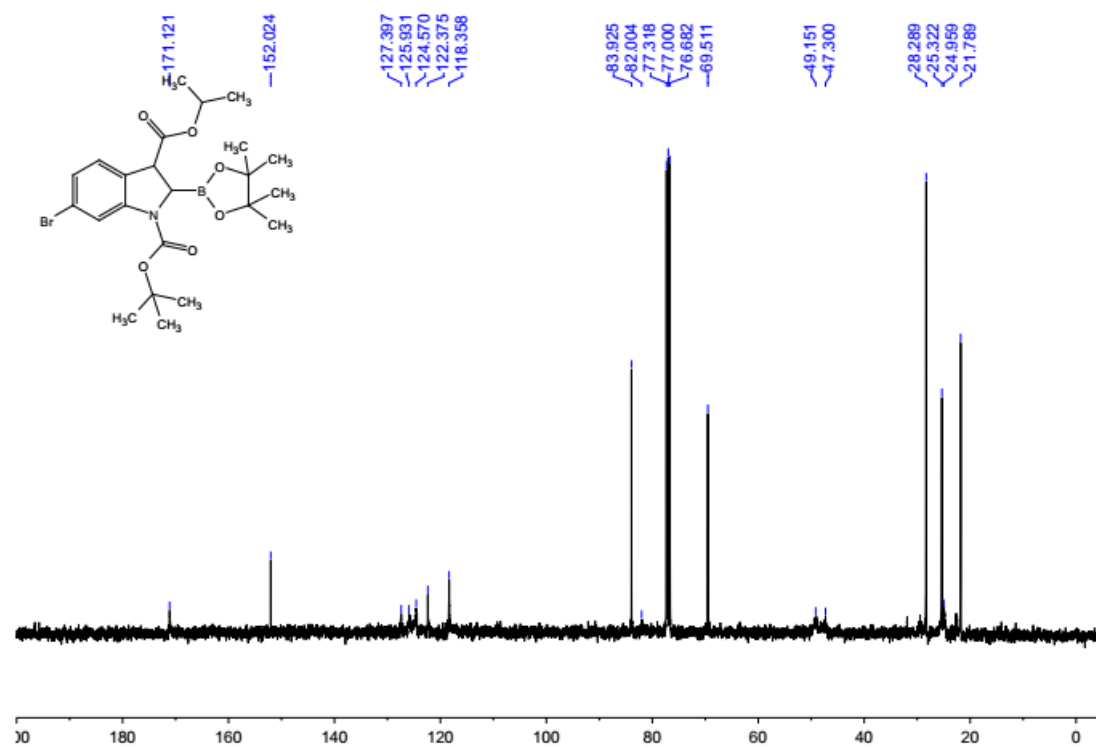

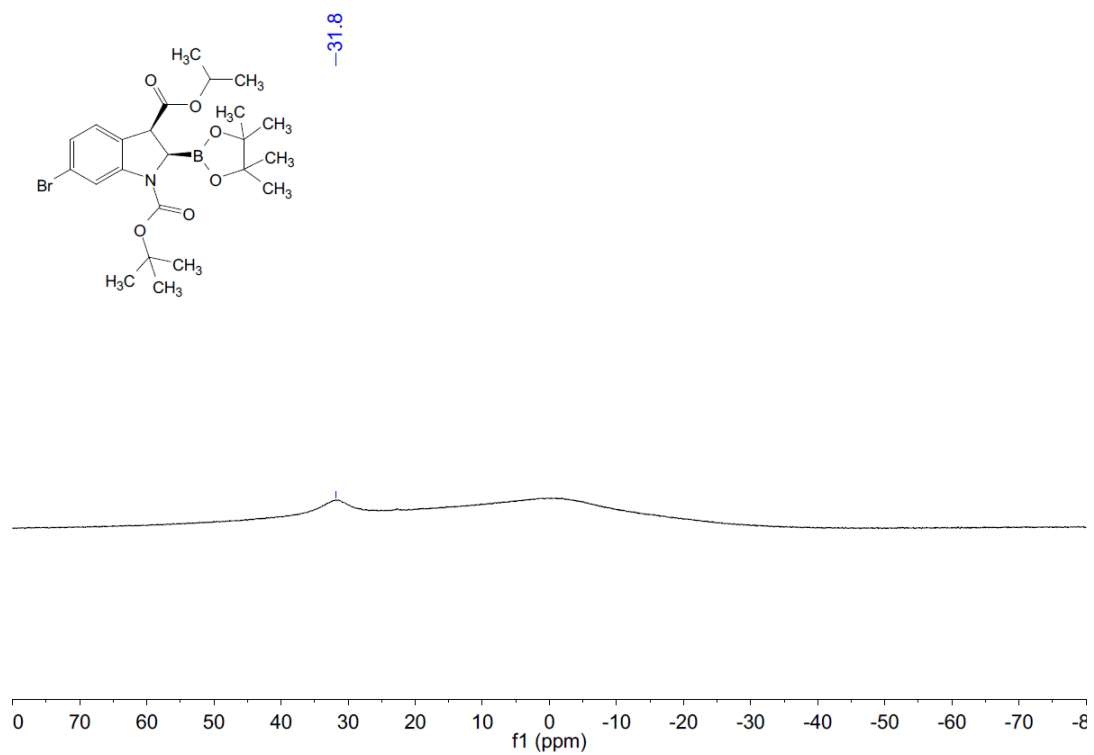

### Compound 3t

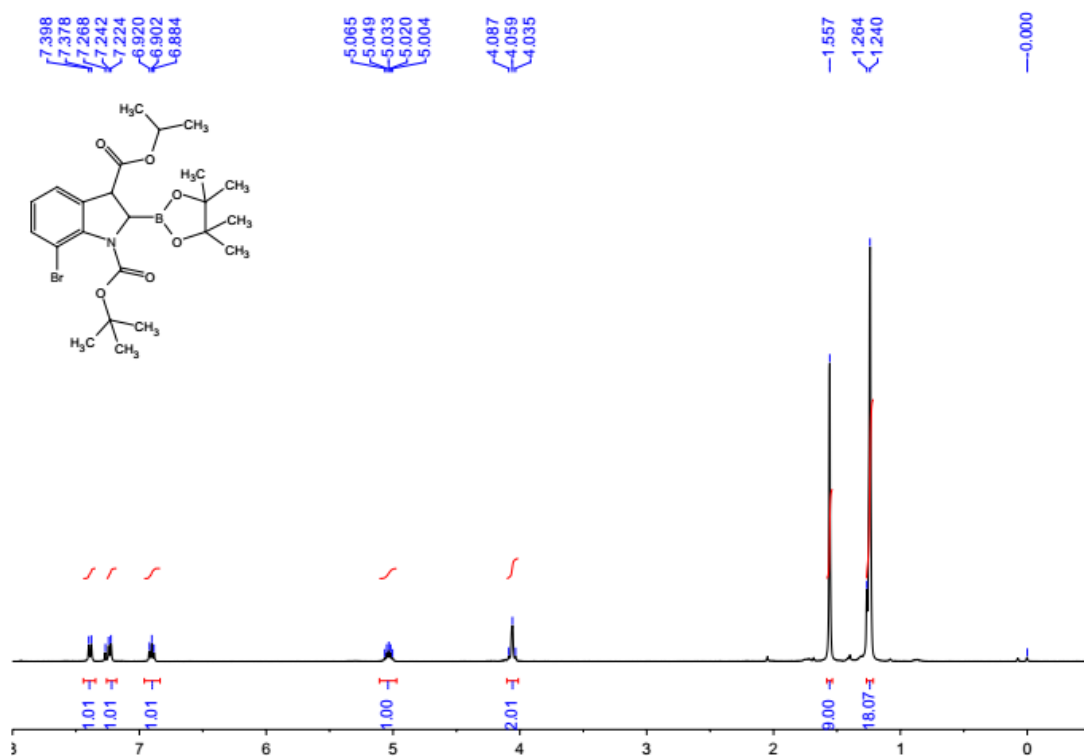

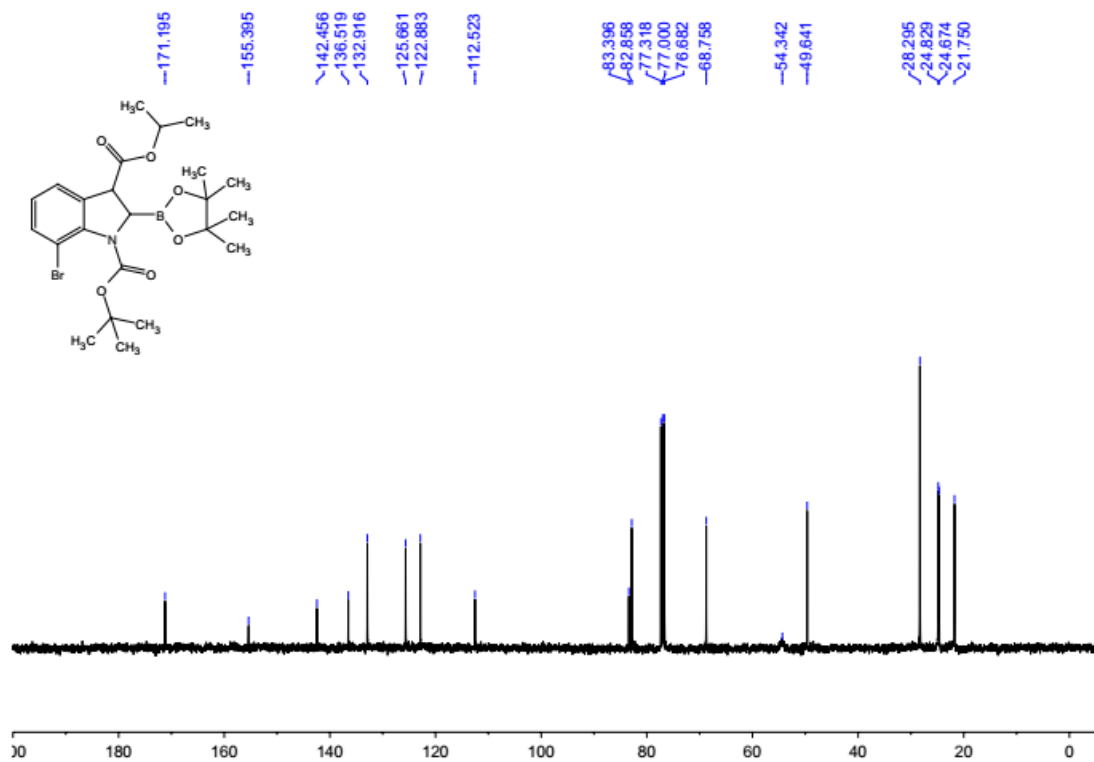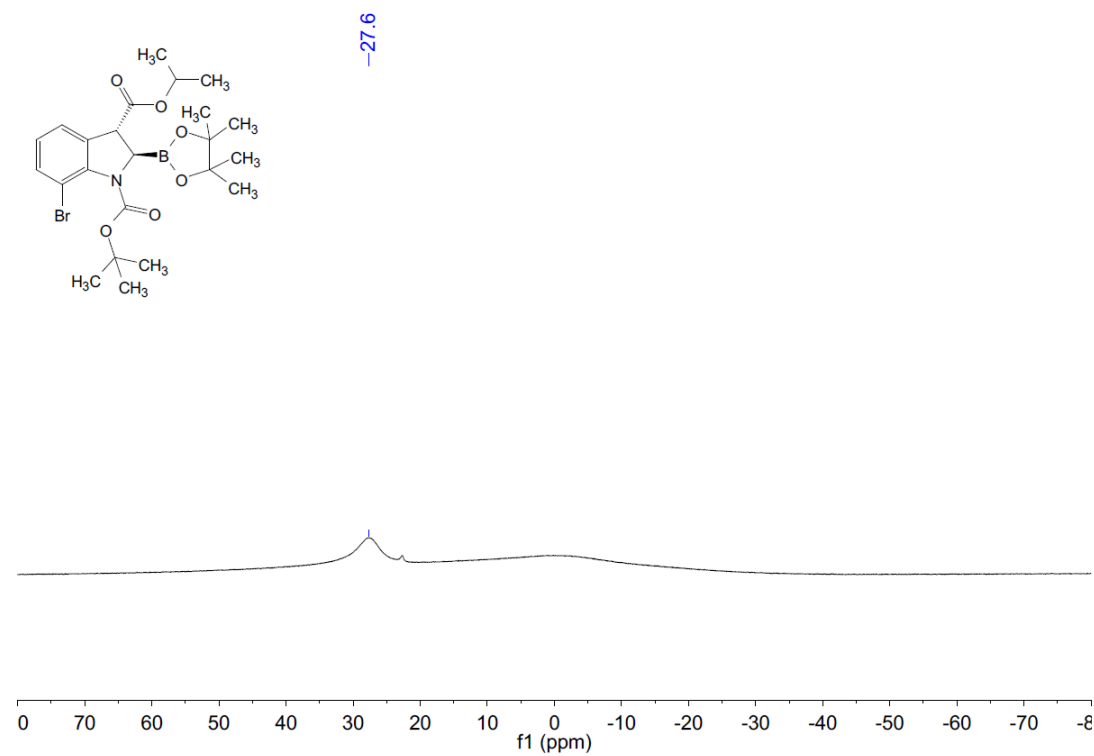

# Compound 2v

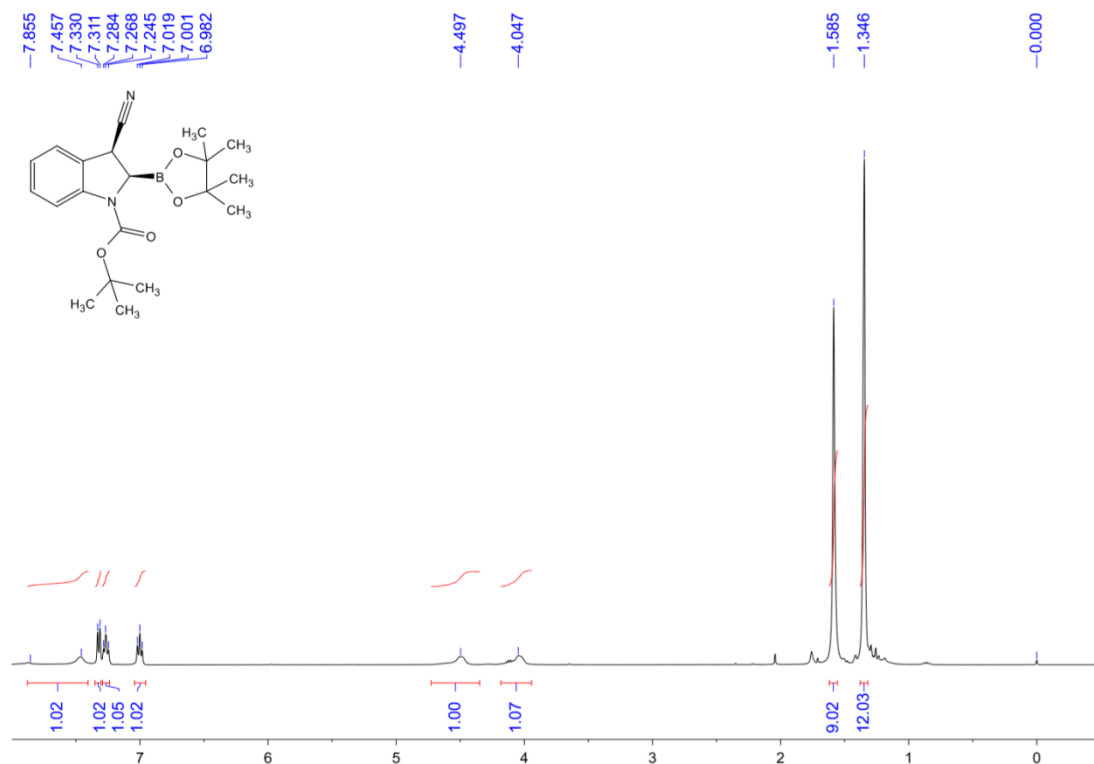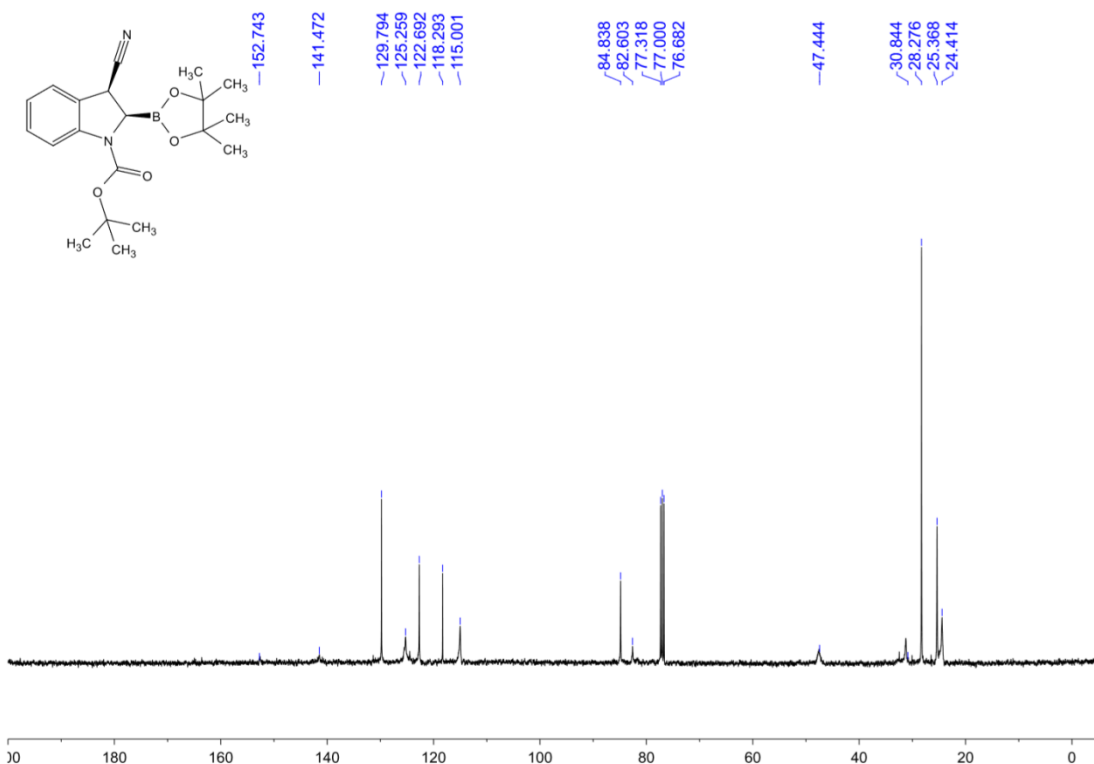

# Compound 4a

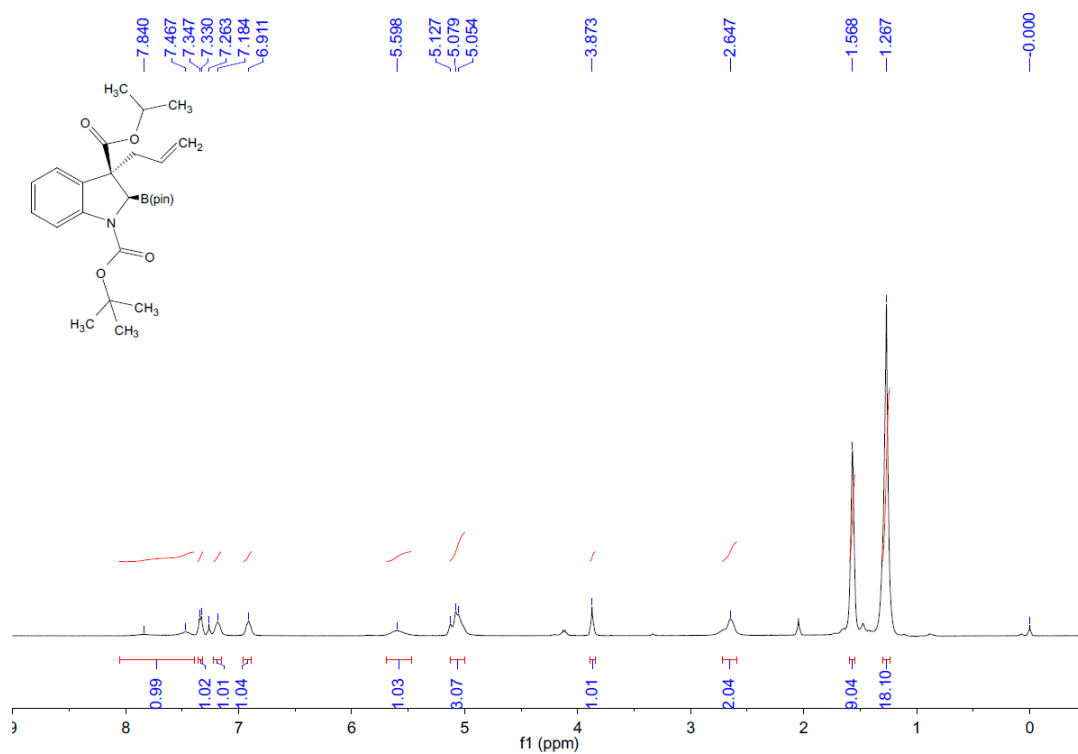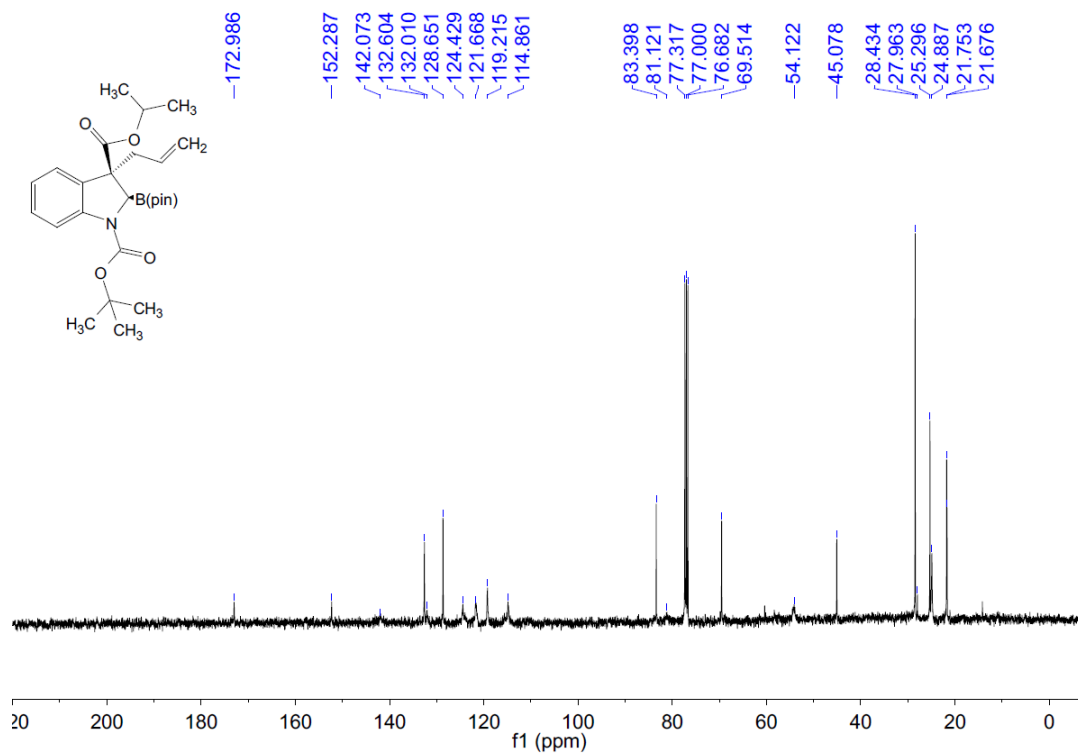

# Compound 4b

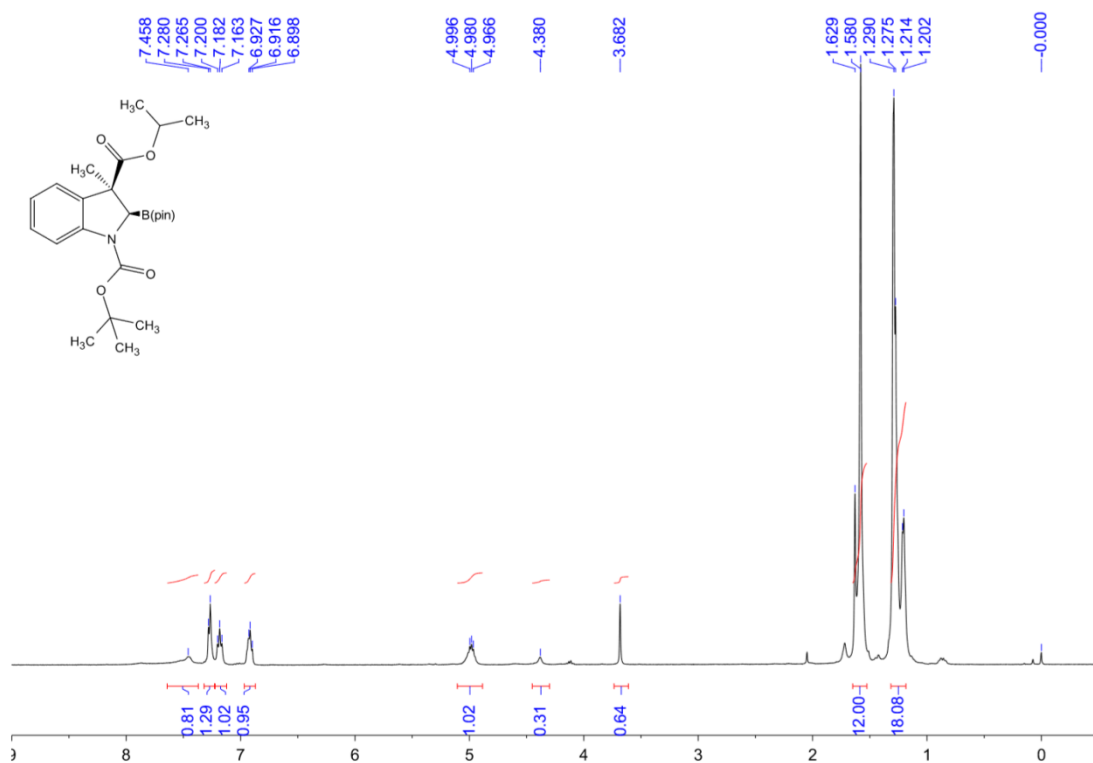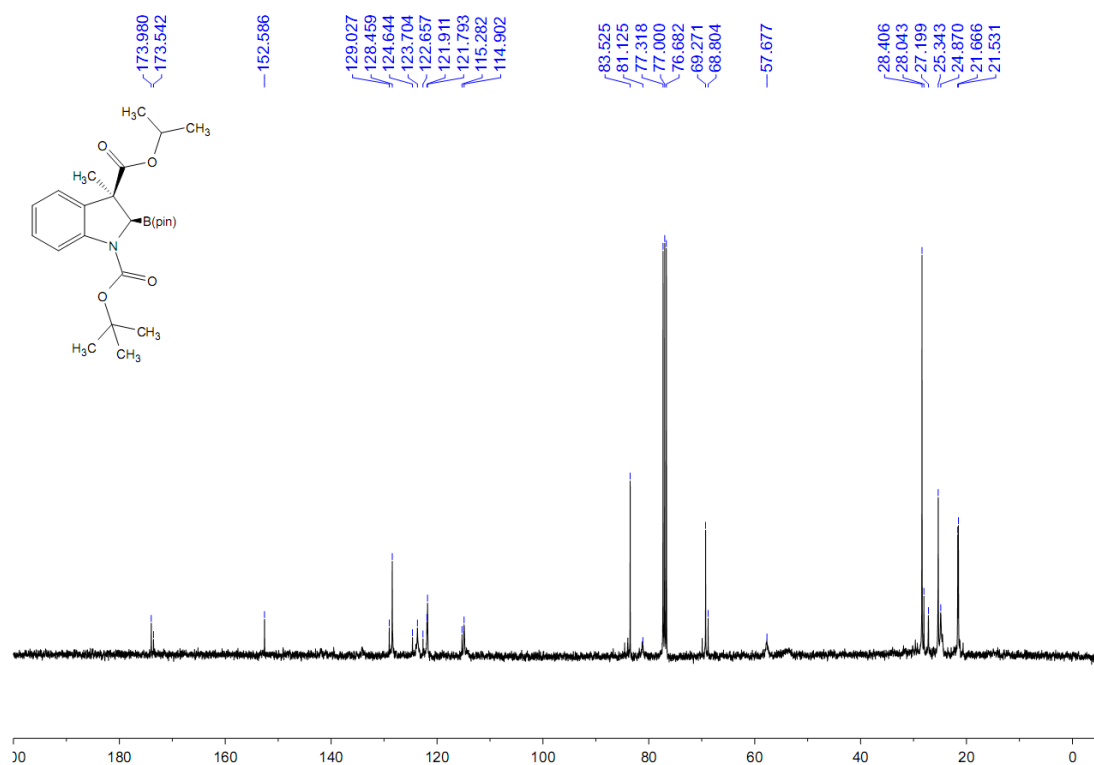



# Compound 4c

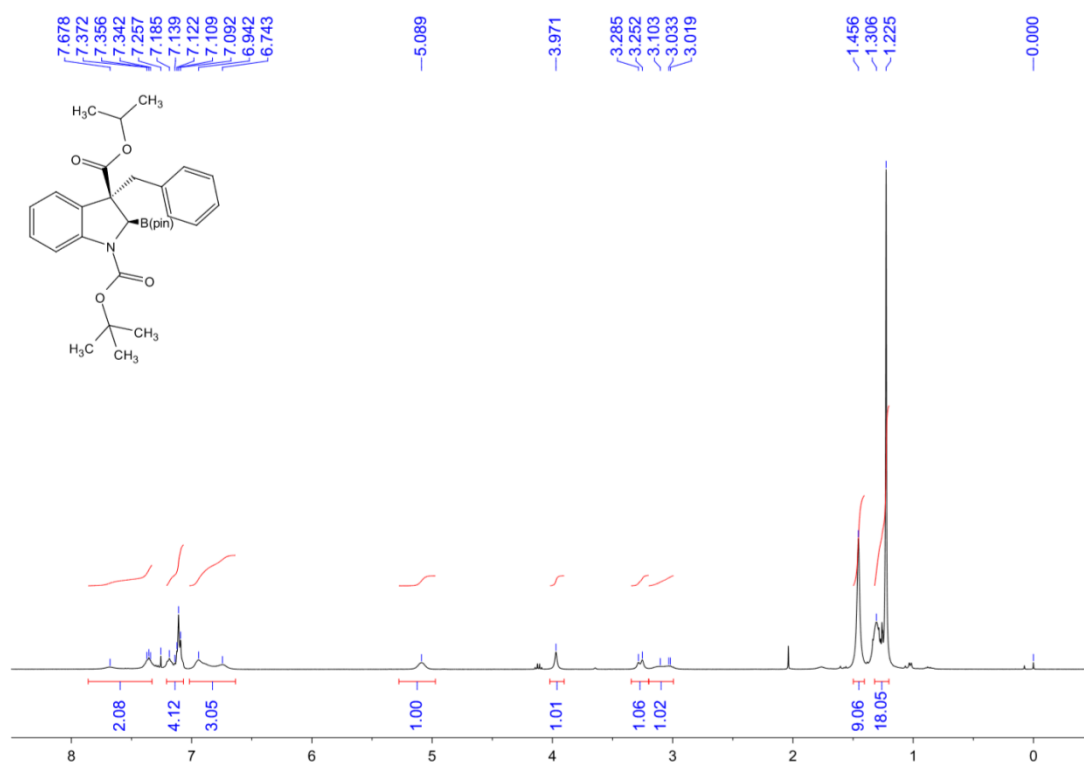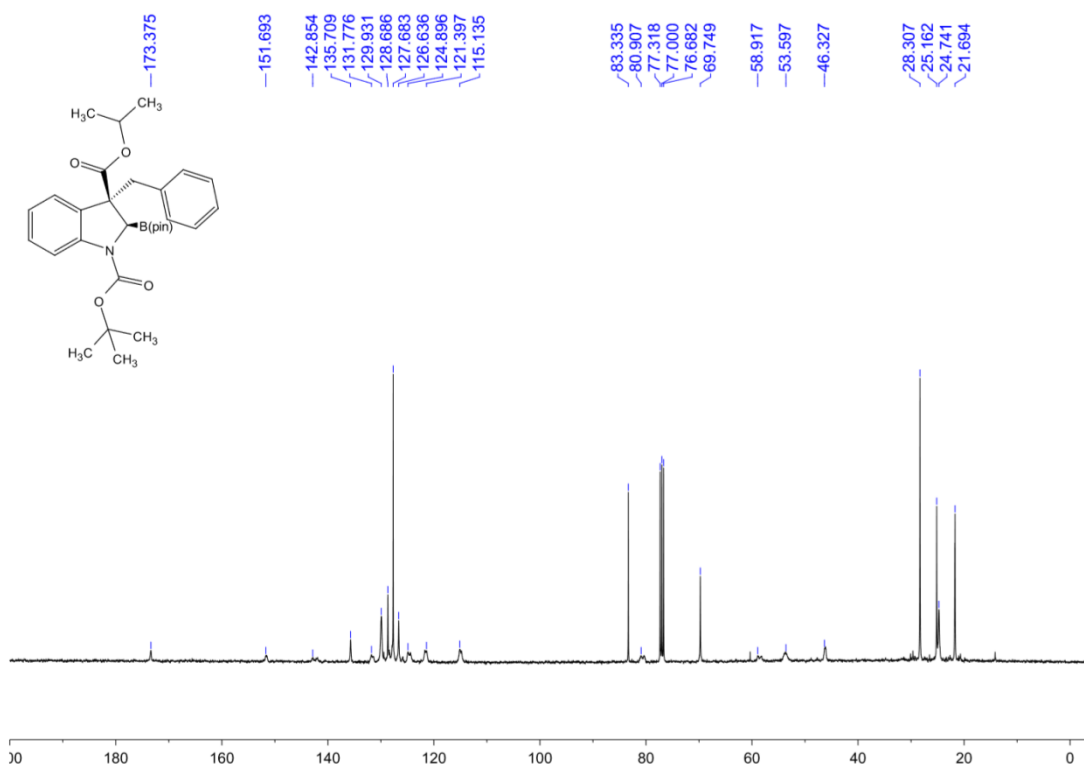

# Compound 4d

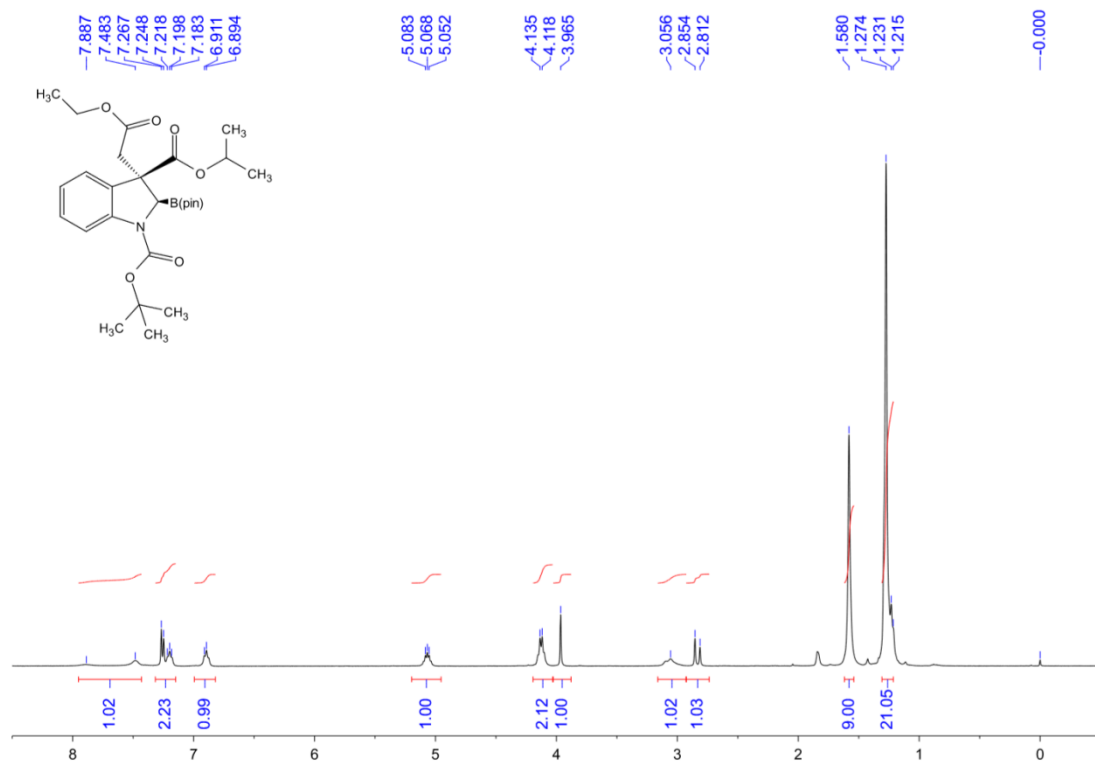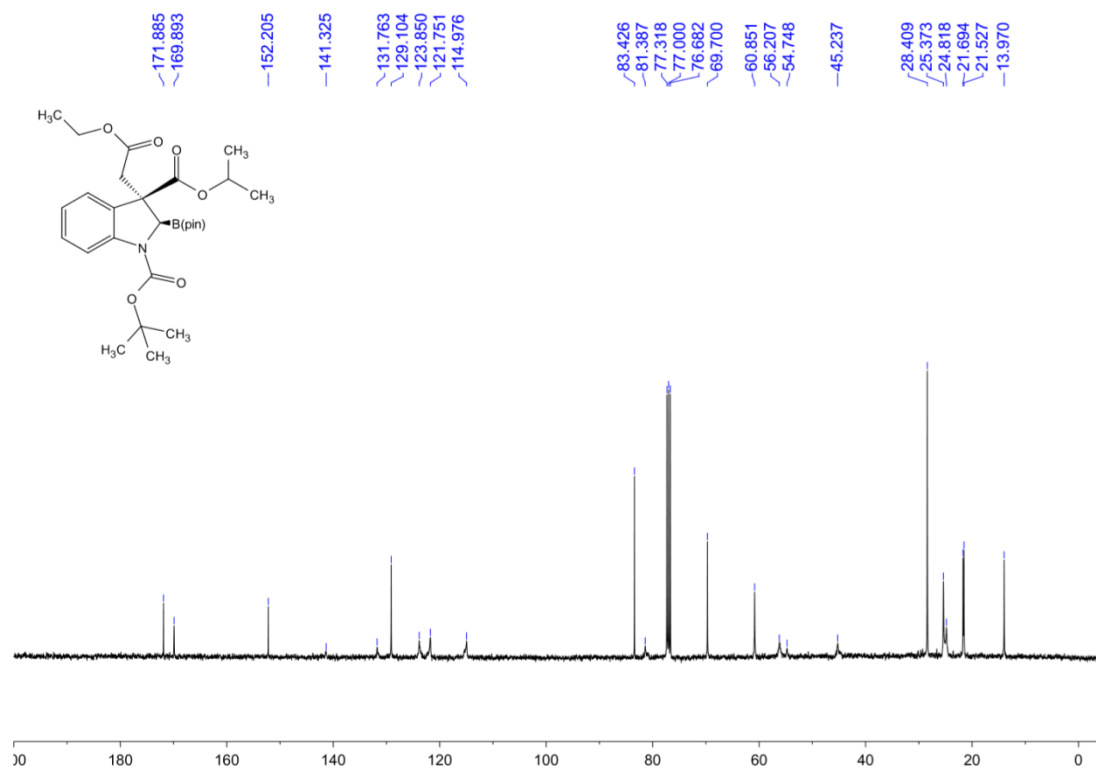

# Compound 5

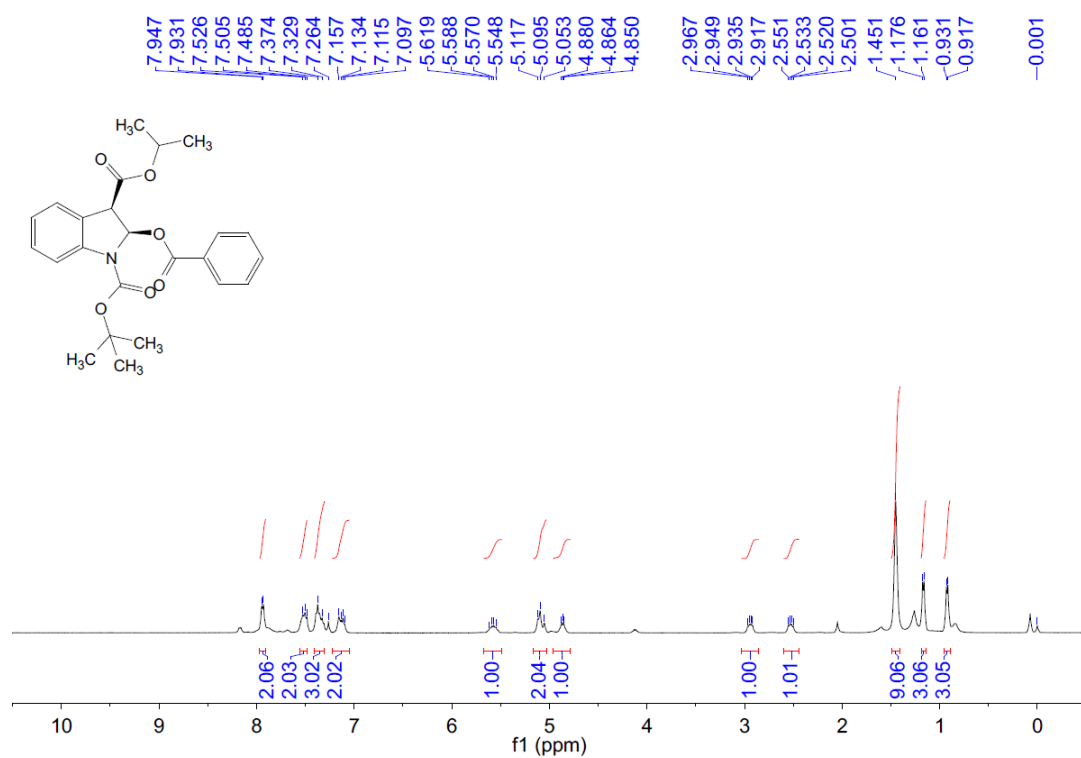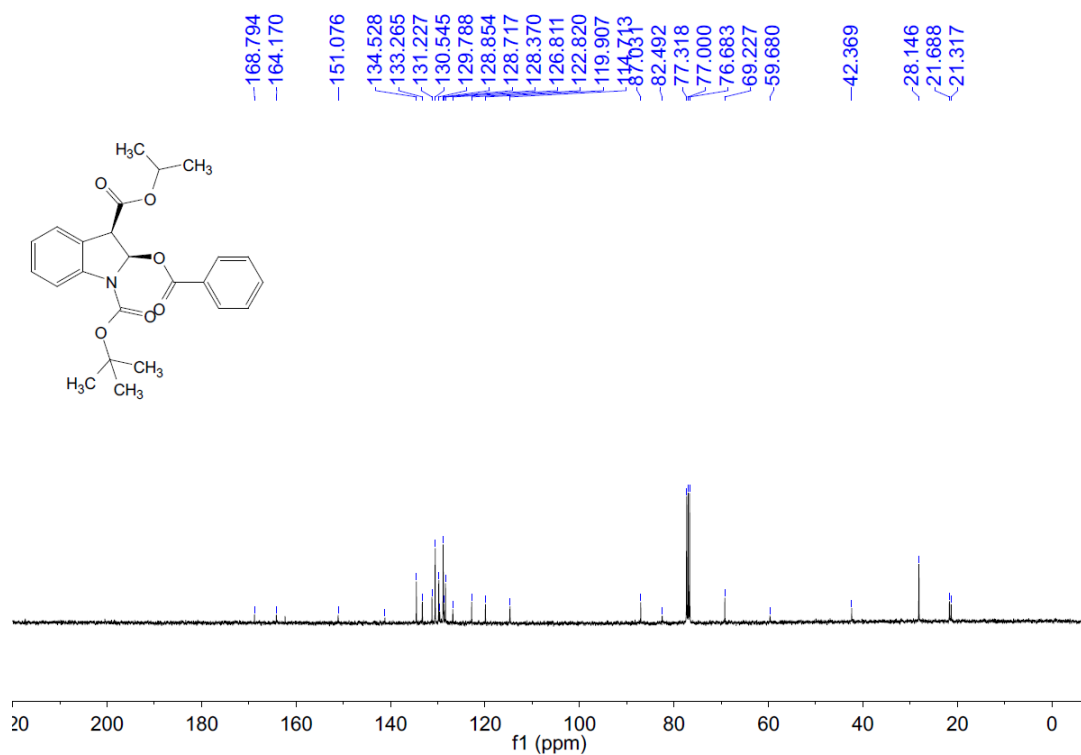

# Compound 6

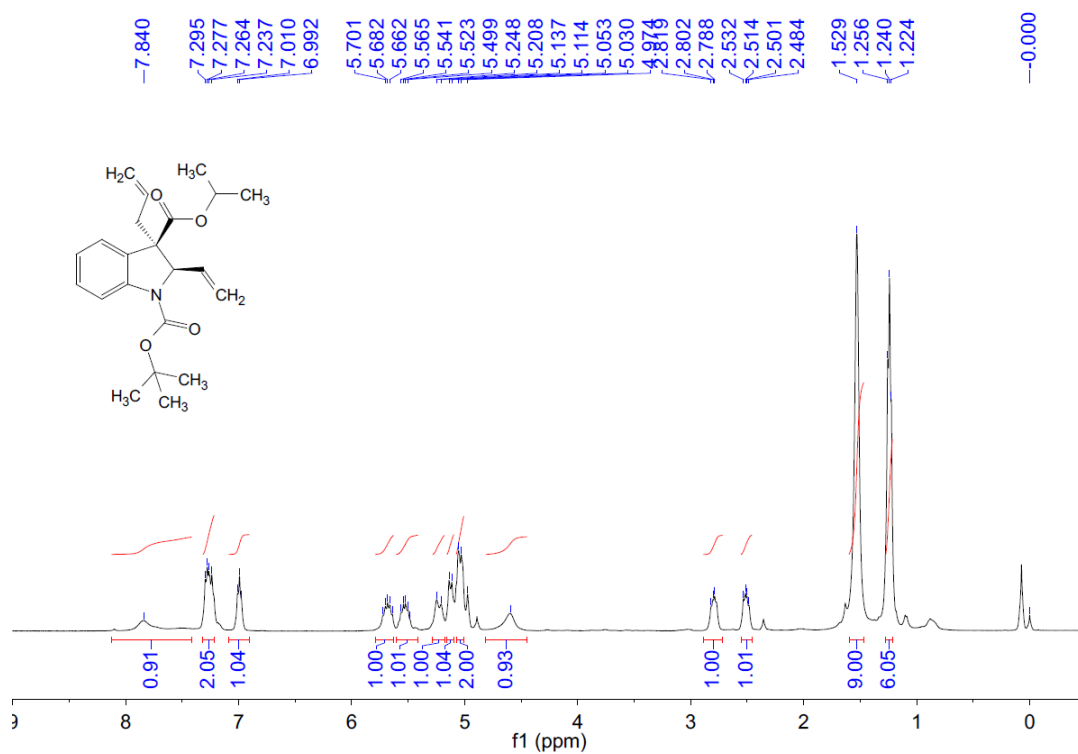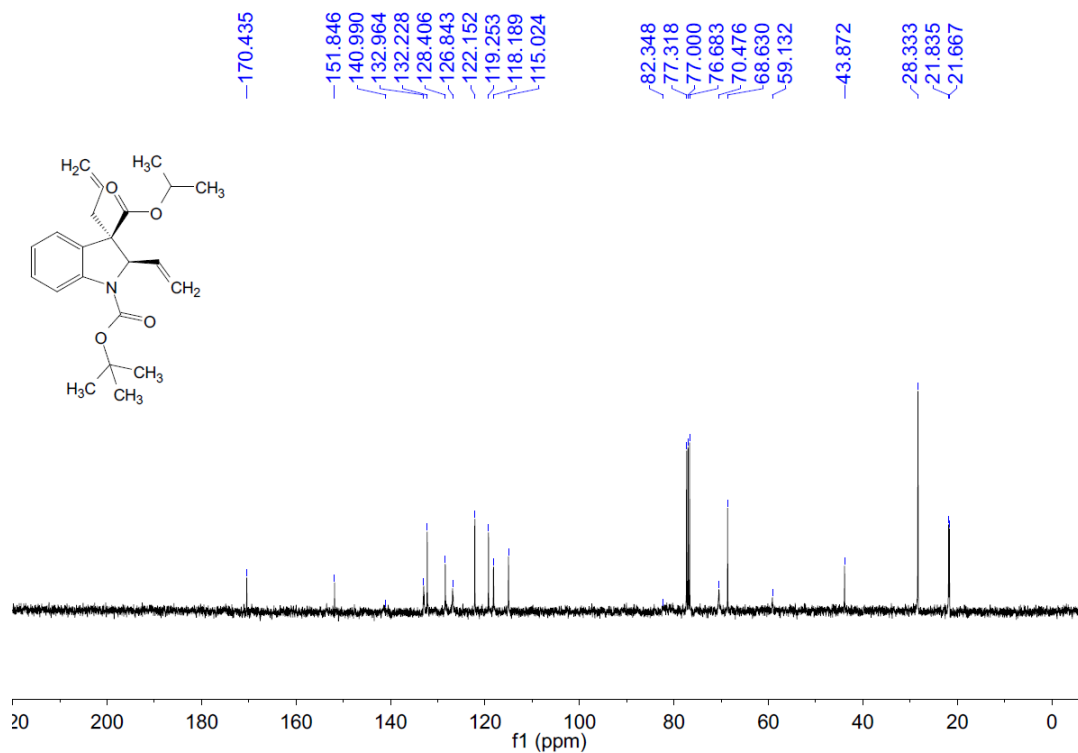

# Compound 7

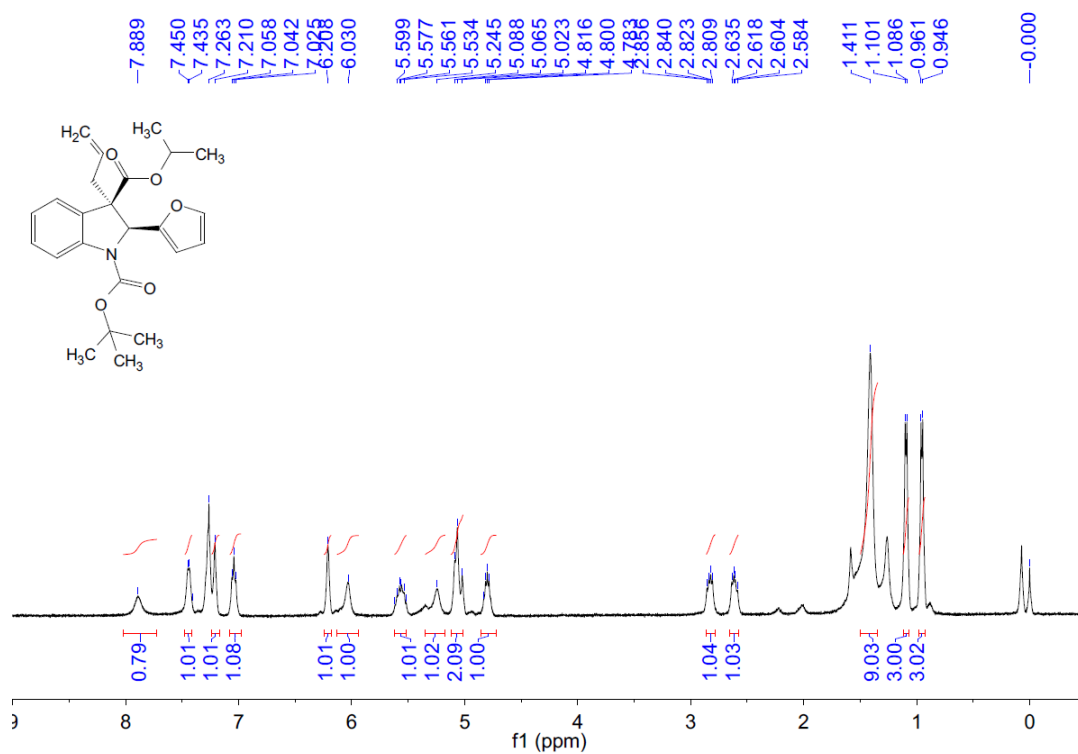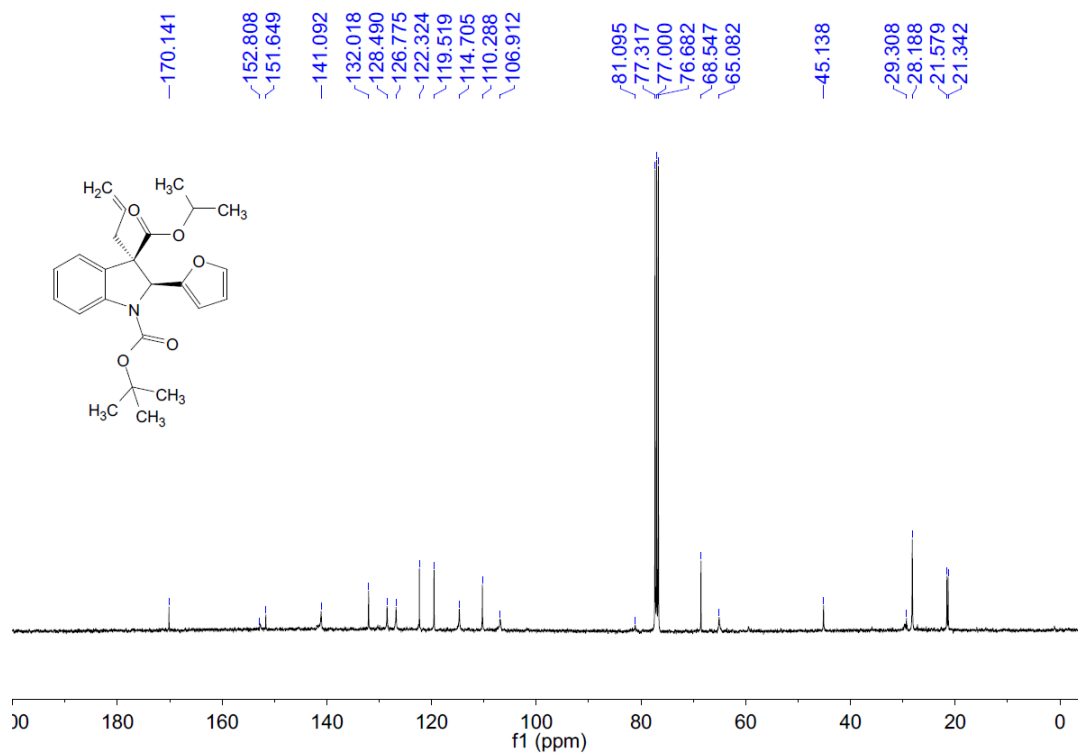

Supplement: SC-009-C8SC01815D-s001.pdf [file SC-009-C8SC01815D-s001.pdf]
